# Supplementary material for: A temperature- and stress-controlled failure criterion for ice-filledpermafrost rock joints
Source: Copernicus journal article supplement (doi:10.5194/tc-2018-57), 2018-03-28
Supplement: Supplementary file 1 [file tc-2018-57-supplement.zip]

Archive with 22 entries (22 files):
- Suppl. material_Mamot et al/data_acoustic_pdf_Fig. S4.xlsx
- Suppl. material_Mamot et al/data_experiments.xlsx
- Suppl. material_Mamot et al/data_frictioncoeff_cohesion_Fig. 8.xlsx
- Suppl. material_Mamot et al/data_timeseries_acoustic_exp1b_WSK_spec4_Fig. S3.xlsx
- Suppl. material_Mamot et al/data_timeseries_acoustic_exp2b_WSK_spec3_Fig. S3.xlsx
- Suppl. material_Mamot et al/data_timeseries_acoustic_exp3b_WSK_spec3_Fig. S3.xlsx
- Suppl. material_Mamot et al/data_timeseries_acoustic_exp5b_WSK_spec2_Fig. S3.xlsx
- Suppl. material_Mamot et al/data_timeseries_acoustic_exp5c_WSK_spec1_Fig. 5.xlsx
- Suppl. material_Mamot et al/data_timeseries_acoustic_exp5c_WSK_spec2_Fig. 5.xlsx
- Suppl. material_Mamot et al/data_timeseries_acoustic_exp5c_WSK_spec3_Fig. 5.xlsx
- Suppl. material_Mamot et al/data_timeseries_acoustic_exp5c_WSK_spec4_Fig. 5.xlsx
- Suppl. material_Mamot et al/data_timeseries_acoustic_exp6b_Fig. 4.xlsx
- Suppl. material_Mamot et al/data_timeseries_acoustic_exp6b_WSK_spec1_Fig. S3.xlsx
- Suppl. material_Mamot et al/data_timeseries_acoustic_exp7b_WSK_spec2_Fig. S3.xlsx
- Suppl. material_Mamot et al/data_timeseries_shearmachine_exp1b_WSK_spec4_Fig. S3.xlsx
- Suppl. material_Mamot et al/data_timeseries_shearmachine_exp2b_WSK_spec3_Fig. S3.xlsx
- Suppl. material_Mamot et al/data_timeseries_shearmachine_exp3b_WSK_spec3_Fig. S3.xlsx
- Suppl. material_Mamot et al/data_timeseries_shearmachine_exp5b_WSK_spec2_Fig. S3.xlsx
- Suppl. material_Mamot et al/data_timeseries_shearmachine_exp6b_Fig. 4.xlsx
- Suppl. material_Mamot et al/data_timeseries_shearmachine_exp6b_WSK_spec1_Fig. S3.xlsx
- Suppl. material_Mamot et al/data_timeseries_shearmachine_exp7b_WSK_spec2_Fig. S3.xlsx
- Suppl. material_Mamot et al/Supplements_Mamot et al..pdf
