# Supplementary material for: A temperature- and stress-controlled failure criterion for ice-filledpermafrost rock joints
Source: Copernicus journal article supplement (doi:10.5194/tc-2018-57), 2018-03-28
Supplement: Supplementary file 1 [file tc-2018-57-supplement.zip › Suppl. material_Mamot et al/data_acoustic_pdf_Fig. S4.xlsx]

## Sheet: Sheet1
temperature class_degree	normal load class_kPa	b_value	b_error
-10	100	1.73214	0.0876731
-10	200	1.85975	0.103632
-10	400	1.6771	0.123775
-8	100	1.7014	0.112728
-8	200	1.75541	0.165313
-8	400	1.79697	0.244935
-6	100	1.70266	0.148396
-6	200	1.64035	0.0746365
-6	400	1.76874	0.148679
-4	100	1.66072	0.228663
-4	200	1.96464	0.13272
-4	400	1.86265	0.132936
-2	100	1.90044	0.17867
-2	200	1.82735	0.212698
-2	400	1.8437	0.0422981
-1	100	1.74833	0.145968
-1	200	1.6755	0.190875
-1	400	1.82551	0.108309
