# Supplementary material for: A temperature- and stress-controlled failure criterion for ice-filledpermafrost rock joints
Source: Copernicus journal article supplement (doi:10.5194/tc-2018-57), 2018-03-28
Supplement: Supplementary file 1 [file tc-2018-57-supplement.zip › Suppl. material_Mamot et al/data_experiments.xlsx]

## Sheet: Sheet1
experiment	specimen	ice layer thickness_mm	temperature class_degree	temperature_degree	normal stress class_kPa	normal stress_kPa	time_start deformation_sec	time until rupture_sec	time_onset increase AE hits_sec	peak shear stress_kPa	failure type_code number	failure type_description	shear rate_from shear start_mm/min	shear deformation_mm
exp1a_WSK	spec1	3	-10	-10.3	100	104.73	350.675	778.203	725	807.918	2	ice	0.706	19.98
exp1a_WSK	spec2	2.5	-10	-10.1	100	100.927	373.485	586.796	525	1182.29	2	ice	0.688	19.93
exp1a_WSK	spec3	3.5	-10	-9.5	100	109.872	346.293	734.508	515	1324.18	2	ice	0.833	19.62
exp1a_WSK	spec4	2	-10	-10.3	100	109.525	338.747	1114.8	985	822.183	2	ice	0.562	17.88
exp1a_WSK	spec5	3	-10	-10.4	100	87.0286	374.85	862.85	815	561.626	2	ice	0.657	19.93
exp1b_WSK	spec1	2	-10	-9.43	200	208.807	441.07	864.799	765	1305.78	2	ice	0.457	19.82
exp1b_WSK	spec2	3	-10	-9.3	200	217.385	402.147	747.827	535	1228.95	2	ice	0.602	19.82
exp1b_WSK	spec4	2.5	-10	-9.9	200	208.783	347.7	790.644	655	1611.03	2	ice	0.806	19.93
exp1b_WSK	spec5	3	-10	-9.9	200	205.127	389.827	670.571	385	1107.4	2	ice	0.712	19.93
exp1c_WSK	spec1	3	-10	-10.35	400	399.324	416.583	935.03	825	1015.38	2	ice	0.564	19.88
exp1c_WSK	spec2	3	-10	-10.3	400	435.49	435.7	686.107	635	941.601	3	mixed	0.703	19.88
exp1c_WSK	spec5	2.5	-10	-9.35	400	436.153	399.365	977.565	905	1089.64	3	mixed	0.657	19.88
exp1c_WSK	spec6	2.5	-10	-9.84	400	431.516	399.458	1321.57	1075	2035.56	3	mixed	0.586	20.18
exp1c_WSK	spec7	2.5	-10	-10.47	400	430.303	409.909	1081.59	955	949.633	2	ice	0.635	19.98
exp2a_WSK	spec1	2.5	-8	-8.2	100	110.561	334.89	763.595	705	684.003	3	mixed	0.764	16.44
exp2a_WSK	spec2	2.5	-8	-7.9	100	123.682	339.849	672.633	575	736.204	3	mixed	0.917	19.98
exp2a_WSK	spec3	3	-8	-8	100	113.507	370.133	539.845	465	666.675	2	ice	0.82	12.04
exp2a_WSK	spec4	2.5	-8	-7.75	100	110.161	352.241	998.265	945	1190.93	2	ice	0.718	16.49
exp2a_WSK	spec5	2.5	-8	-7.9	100	110.611	345.419	860.434	685	772.801	2	ice	0.865	16.6
exp2b_WSK	spec2	2.5	-8	-8.02	200	200.944	403.474	569.969	535	734.88	2	ice	0.852	19.93
exp2b_WSK	spec3	2.5	-8	-7.89	200	224.068	418.494	756.678	655	1428.06	1	rock/ice	0.643	19.26
exp2b_WSK	spec4	2.5	-8	-7.9	200	208.92	354.427	900.587	805	1068.47	2	ice	0.829	19.88
exp2b_WSK	spec7	3	-8	-7.9	200	196.62	367.784	927.424	805	892.127	3	mixed	0.737	20.08
exp2c_WSK	spec1	2	-8	-8.25	400	410.233	400.716	855.852	400.716	926.713	2	ice	0.738	19.93
exp2c_WSK	spec2	2	-8	-8	400	400.768	356.122	861.506	745	1353.7	2	ice	0.829	20.18
exp2c_WSK	spec3	2	-8	-7.95	400	437.727	412.861	906.381	825	1285.18	2	ice	0.57	16.14
exp2c_WSK	spec4	2	-8	-7.8	400	410.422	416.858	1049.04	1015	1575.54	2	ice	0.824	17.67
exp3a_WSK	spec1	3.4	-6	-6.07	100	101.209	426.892	966.533	935	733.4	3	mixed	0.321	10.76
exp3a_WSK	spec2	2.5	-6	-6.3	100	123.299	368.804	1038.48	965	1325.09	3	mixed	0.66	14.34
exp3a_WSK	spec3	2.5	-6	-5.8	100	110.304	345.436	627.94	345.436	870.975	2	ice	0.939	19.88
exp3a_WSK	spec5	3	-6	-5.9	100	108.79	367.547	805.611	785	294.027	3	mixed	0.778	20.13
exp3a_WSK	spec6	2.5	-6	-5.96	100	102.084	364.563	695.899	535	665.006	2	ice	0.793	20.54
exp3b_WSK	spec1	2.5	-6	-5.55	200	208.579	411.515	1414.28	1305	1194.45	3	mixed	0.432	10.19
exp3b_WSK	spec3	3	-6	-6.3	200	219.595	410.524	1149.18	905	1338.77	3	mixed	0.603	19.93
exp3b_WSK	spec4	2.5	-6	-5.9	200	215.741	366.837	811.348	715	1555.68	3	mixed	0.895	19.06
exp3b_WSK	spec5	2.5	-6	-6.1	200	212.894	354.286	772.79	675	1354.24	3	mixed	0.88	19.88
exp3c_WSK	spec1	3	-6	-6.3	400	423.903	423.942	853.102	423.942	1199.33	2	ice	0.821	19.98
exp3c_WSK	spec3	2	-6	-5.8	400	421.943	467.758	927.895	715	1113.21	2	ice	0.807	17.93
exp3c_WSK	spec4	2	-6	-6.3	400	408.16	394.14	819.684	635	1544.55	1	rock/ice	0.739	17.52
exp3c_WSK	spec5	3	-6	-6.4	400	420.905	406.719	803.638	595	1485.55	3	mixed	0.89	19.93
exp3c_WSK	spec6	2.5	-6	-6.1	400	396.456	393.082	919.858	865	792.911	2	ice	0.657	20.03
exp4a_WSK	spec1	2.5	-5	-5.15	100	105.138	382.428	916.292	755	1171.54	3	mixed	0.927	17.78
exp4a_WSK	spec2	3	-5	-5.14	100	95.0778	365.46	694.835	505	322.688	1	rock/ice	0.637	14.09
exp4a_WSK	spec3	3	-5	-5.04	100	100.441	388.212	621.004	515	482.12	1	rock/ice	0.837	19.98
exp4a_WSK	spec4	2.5	-5	-4.8	100	101.529	355.995	607.443	555	359.702	3	mixed	0.726	18.34
exp4a_WSK	spec5	2	-5	-4.71	100	109.559	391.21	1397.07	1275	608.66	3	mixed	0.59	13.68
exp4a_WSK	spec6	2.5	-5	-5.21	100	103.709	374.9	814.092	705	956.428	3	mixed	0.658	19.93
exp4b_WSK	spec1	3	-5	-4.83	200	214.995	431.628	581.54	535	928.777	3	mixed	0.405	8.5
exp4b_WSK	spec2	2	-5	-4.73	200	211.454	346.411	613.186	605	331.468	1	rock/ice	0.634	18.65
exp4b_WSK	spec3	3.5	-5	-4.45	200	204.51	350.063	660.831	645	218.912	1	rock/ice	0.739	14.45
exp4b_WSK	spec5	2.5	-5	-4.95	200	210.079	352.15	818.525	785	583.553	3	mixed	0.7	17.06
exp4b_WSK	spec6	3.5	-5	-4.92	200	234.723	367.612	1328.44	1285	512.122	3	mixed	0.686	16.91
exp4b_WSK	spec7	2.5	-5	-4.98	200	206.117	397.204	1107.82	1045	706.687	2	ice	0.717	19.88
exp4c_WSK	spec1	3	-5	-4.84	400	401.907	436.252	729.909	655	1077.77	1	rock/ice	0.592	12.45
exp4c_WSK	spec2	3.5	-5	-5	400	411.297	350.91	785.502	675	1657.02	3	mixed	0.614	16.65
exp4c_WSK	spec3	2.5	-5	-5.4	400	428.373	397.875	684.539	645	932.002	3	mixed	0.798	19.88
exp4c_WSK	spec5	3	-5	-5	400	405.7	407.813	800.493	745	986.523	2	ice	0.83	19.93
exp4c_WSK	spec6	2.5	-5	-4.85	400	426.811	384.339	855.147	785	1177.41	2	ice	0.73	19.93
exp5a_WSK	spec1	3.5	-4	-4.3	100	131.94	361.738	764.082	361.738	439.8	3	mixed	0.731	19.98
exp5a_WSK	spec2	3.5	-4	-3.9	100	117.625	355.178	744.482	715	557.631	3	mixed	0.724	20.23
exp5a_WSK	spec6	3.5	-4	-3.9	100	105.291	352.348	801.692	352.348	362.668	2	ice	0.779	19.98
exp5a_WSK	spec7	2.5	-4	-3.98	100	107.611	385.292	1592.79	1445	430.445	1	rock/ice	0.616	19.31
exp5a_WSK	spec8	3.5	-4	-4.2	100	99.9863	376.219	555.875	405	662.768	2	ice	0.717	20.08
exp5b_WSK	spec2	3	-4	-4.18	200	204.532	407.068	856.565	785	1227.19	1	rock/ice	0.605	19.62
exp5b_WSK	spec3	3.5	-4	-4.4	200	204.735	373.757	460.469	425	545.959	3	mixed	0.574	19.98
exp5b_WSK	spec4	2	-4	-4.2	200	209.799	356.735	539.296	356.735	1011.64	2	ice	0.96	20.23
exp5b_WSK	spec5	2.5	-4	-4.3	200	218.44	358.565	606.7	555	781.178	1	rock/ice	0.837	19.98
exp5b_WSK	spec6	3	-4	-3.88	200	208.207	340.094	438.309	425	695.926	3	mixed	0.852	19.67
exp5c_WSK	spec1	3.5	-4	-3.84	400	431.312	386.521	639.465	525	1209.99	2	ice	0.698	12.5
exp5c_WSK	spec2	2.5	-4	-4.6	400	525.287	399.254	775.278	695	1840.77	1	rock/ice	0.889	17.47
exp5c_WSK	spec3	4	-4	-4.5	400	437.924	368.582	528.318	495	715.562	1	rock/ice	0.918	19.72
exp5c_WSK	spec4	2	-4	-3.95	400	397.882	414.27	629.43	414.27	790.039	3	mixed	0.84	20.03
exp5d_WSK	spec2	2	-4	-3.8	800	827.717	492.985	1159.22	1085	883.684	1	rock/ice	0.389	10.09
exp5d_WSK	spec3	3	-4	-3.8	800	868.632	469.168	1157.7	1025	1288.18	3	mixed	0.465	13.22
exp5d_WSK	spec4	2.5	-4	-4.1	800	822.463	27.686	370.551	295	905.569	3	mixed	0.754	19.52
exp5d_WSK	spec6	3	-4	-4.1	800	839.387	384.381	812.564	745	882.954	1	rock/ice	0.62	14.39
exp6a_WSK	spec1	2	-3	-3.2	100	110.685	358.78	736.165	358.78	466.04	3	mixed	0.799	20.08
exp6a_WSK	spec2	2	-3	-3	100	104.994	346.531	656.994	585	863.284	1	rock/ice	0.743	19.93
exp6a_WSK	spec3	2	-3	-2.8	100	97.7319	353.082	573.331	535	402.425	2	ice	0.82	20.13
exp6a_WSK	spec4	2	-3	-3	100	108.221	380.933	731.221	685	538.182	3	mixed	0.836	19.93
exp6a_WSK	spec5	2	-3	-3.15	100	107.368	375.98	882.54	865	684.836	1	rock/ice	0.701	17.72
exp6b_WSK	spec1	2	-3	-3.23	200	201.782	399.453	708.366	605	900.038	3	mixed	0.603	20.03
exp6b_WSK	spec2	2.5	-3	-2.75	200	211.511	441.861	559.94	485	703.132	3	mixed	0.729	15.27
exp6b_WSK	spec3	2.5	-3	-3.14	200	209.093	351.542	560.678	351.542	669.096	2	ice	0.71	15.27
exp6b_WSK	spec4	2.5	-3	-3.4	200	205.302	370.325	613.405	385	537.833	3	mixed	0.743	20.03
exp6b_WSK	spec5	2.5	-3	-2.9	200	207.199	358.013	769.045	685	525.292	3	mixed	0.666	19.88
exp6c_WSK	spec1	2	-3	-2.9	400	401.937	356.173	584.598	535	930.197	1	rock/ice	0.722	17.16
exp6c_WSK	spec2	3.5	-3	-3.2	400	414.761	359.811	702.011	655	487.271	3	mixed	0.705	19.93
exp6c_WSK	spec3	3.5	-3	-3	400	403.189	358.683	473.524	435	583.336	3	mixed	0.827	19.88
exp6d_WSK	spec1	2.5	-3	-3.4	800	841.272	371.941	791.477	725	867.653	3	mixed	0.879	19.88
exp6d_WSK	spec2	3.5	-3	-2.7	800	808.886	346.338	527.506	375	760.637	1	rock/ice	0.782	15.98
exp6d_WSK	spec3	1.5	-3	-3.6	800	842.061	358.934	769.406	715	765.51	1	rock/ice	0.707	19.88
exp6d_WSK	spec4	3.5	-3	-2.7	800	824.183	333.613	441.965	355	764.294	1	rock/ice	0.722	11.83
exp6d_WSK	spec5	3	-3	-3	800	822.591	335.132	566.675	515	669.618	1	rock/ice	0.611	20.03
exp7a_WSK	spec1	2.5	-2	-2.2	100	105.769	332.394	448.026	435	600.31	1	rock/ice	1.013	19.93
exp7a_WSK	spec2	2.5	-2	-2.4	100	109.327	350.277	489.733	435	374.013	3	mixed	0.747	13.52
exp7a_WSK	spec3	2.5	-2	-2.4	100	107.995	369.085	436.069	369.085	466.081	3	mixed	1.009	19.93
exp7a_WSK	spec4	3.5	-2	-1.95	100	104.111	342.999	750.463	725	254.493	1	rock/ice	0.534	19.26
exp7b_WSK	spec1	2.5	-2	-2.3	200	205.31	353.836	443.132	415	515.399	3	mixed	0.903	20.39
exp7b_WSK	spec2	2.5	-2	-2.2	200	207.148	354.868	399.467	365	272.414	1	rock/ice	0.962	19.98
exp7b_WSK	spec3	2	-2	-2	200	223.967	372.119	795.078	705	676.351	1	rock/ice	0.826	11.37
exp7b_WSK	spec4	3	-2	-2.2	200	214.052	386.565	532.581	525	667.841	2	ice	1.034	20.03
exp7b_WSK	spec5	2.5	-2	-2.12	200	200.468	359.902	971.206	915	347.08	3	mixed	0.666	10.35
exp7b_WSK	spec6	2.5	-2	-2.02	200	208.433	373.738	1016.36	965	226.298	3	mixed	0.793	18.8
exp7c_WSK	spec1	3	-2	-2	400	421.827	429.364	626.404	575	669.203	1	rock/ice	0.771	19.93
exp7c_WSK	spec2	2.5	-2	-2.1	400	401.849	372.518	481.63	405	906.298	2	ice	0.736	19.98
exp7c_WSK	spec3	2.5	-2	-2.5	400	433.293	379.131	653.499	395	612.738	1	rock/ice	0.669	19.82
exp7c_WSK	spec4	2.5	-2	-2.18	400	391.38	302.564	587.372	445	823.346	3	mixed	0.747	19.57
exp7c_WSK	spec5	3.5	-2	-1.98	400	413.681	372.508	1020.1	945	496.417	3	mixed	0.638	20.03
exp7d_WSK	spec1	2.5	-2	-2.4	800	818.247	381.135	758.719	635	659.223	3	mixed	0.844	19.93
exp7d_WSK	spec2	2.5	-2	-1.9	800	860.153	448.725	1325.26	1225	635.375	1	rock/ice	0.666	17.06
exp7d_WSK	spec3	2	-2	-1.9	800	817.071	364.397	777.797	705	669.825	1	rock/ice	0.774	19.98
exp8a_WSK	spec1	2.5	-1	-1.2	100	108.802	328.438	487.286	465	418.028	3	mixed	0.887	20.03
exp8a_WSK	spec2	3	-1	-1	100	100.893	409.684	813.844	795	216.407	3	mixed	0.741	19.88
exp8a_WSK	spec3	2.5	-1	-1.2	100	96.9144	367.101	577.821	525	421.862	1	rock/ice	0.779	14.4
exp8a_WSK	spec4	2.5	-1	-1.3	100	98.4696	356.55	615.934	575	393.878	2	ice	0.841	20.08
exp8b_WSK	spec1	4	-1	-1.4	200	220.428	370.804	542.547	485	618.343	3	mixed	0.77	19.88
exp8b_WSK	spec2	3	-1	-0.93	200	202.473	341.828	745.14	355	254.538	3	mixed	0.546	17.78
exp8b_WSK	spec3	3	-1	-0.89	200	206.587	355.429	548.676	525	401.696	1	rock/ice	0.752	19.83
exp8b_WSK	spec4	3.5	-1	-0.96	200	197.976	369.179	1091.09	1075	335.959	3	mixed	0.71	19.72
exp8b_WSK	spec5	2.5	-1	-1.05	200	204.357	354.355	836.203	785	315.294	1	rock/ice	0.743	17.47
exp8c_WSK	spec1	3.5	-1	-1.1	400	420.337	361.775	485.47	435	443.369	1	rock/ice	0.846	19.88
exp8c_WSK	spec2	2.5	-1	-1	400	426.601	389.713	807.256	715	433.931	3	mixed	0.656	19.93
exp8c_WSK	spec3	2.5	-1	-1.08	400	410.939	386.75	558.966	525	275.875	3	mixed	0.643	8.04
exp8c_WSK	spec4	2	-1	-0.82	400	414.131	392.924	916.052	905	486.532	1	rock/ice	0.586	20.08
exp8d_WSK	spec1	1.5	-1	-1.4	800	820.824	345.838	565.957	535	495.374	3	mixed	0.82	19.82
exp8d_WSK	spec2	2	-1	-1.2	800	813.043	344.965	431.124	385	614.046	1	rock/ice	0.748	19.72
exp8d_WSK	spec4	3.5	-1	-1.2	800	811.998	322.518	463.15	395	672.392	1	rock/ice	0.868	19.62
exp8d_WSK	spec5	2.5	-1	-1.1	800	830.467	328.796	557.98	525	491.262	1	rock/ice	0.973	14.96
exp9a_WSK	spec1	1.5	-0.5	-0.6	100	98.3499	340.332	432.661	375	222.357	1	rock/ice	0.973	10.5
exp9a_WSK	spec2	2.5	-0.5	-0.5	100	101.611	333.851	655.363	375	106.029	1	rock/ice	0.955	19.98
exp9a_WSK	spec3	2.5	-0.5	-0.5	100	100.371	358.558	373.43	358.558	135.713	1	rock/ice	0.718	12.04
exp9a_WSK	spec4	3	-0.5	-0.4	100	102.014	340.324	382.46	340.324	136.019	1	rock/ice	0.693	20.44
exp9b_WSK	spec3	2.5	-0.5	-0.47	200	200.4				106.9	1	rock/ice
exp9c_WSK	spec1	2.5	-0.5	-0.44	400	411.752	430.035	678.522	515	278.368	1	rock/ice	0.781	19.72
exp9c_WSK	spec2	2.5	-0.5	-0.6	400	404.898	419.564	559.091	435	317.123	1	rock/ice	0.76	19.82
exp9c_WSK	spec4	2.5	-0.5	-0.59	400	411.193	347.723	950.827	945	295.822	1	rock/ice	0.723	19.77
exp9d_WSK	spec2	3	-0.5	-0.6	800	812.403	398.772	768.052	695	332.999	1	rock/ice	0.681	19.82
exp9d_WSK	spec3	2.5	-0.5	-0.3	800	814.1	377.149	558.956	515	481.581	1	rock/ice	0.832	19.98
exp9d_WSK	spec4	2.5	-0.5	-0.55	800	835.93	400.867	927.531	895	235.473	1	rock/ice	0.717	15.78
exp9d_WSK	spec5	2.5	-0.5	-0.6	800	825.127	364.124	702.428	665	245.782	1	rock/ice	0.787	13.63
