# Supplementary material for: A temperature- and stress-controlled failure criterion for ice-filledpermafrost rock joints
Source: Copernicus journal article supplement (doi:10.5194/tc-2018-57), 2018-03-28
Supplement: Supplementary file 1 [file tc-2018-57-supplement.zip › Suppl. material_Mamot et al/data_frictioncoeff_cohesion_Fig. 8.xlsx]

## Sheet: Sheet1
Fig. 8a
temperature class_degree	-10	-8	-6	-5	-4	-3	-2	-1	-0.5
FRICTION: 100-400 kPa normal stress
mean of temperature class_degree	-9.96	-7.96	-6.06	-4.94	-4.15	-3.05	-2.17	-1.07	-0.51
temperature_degree_error	0.420073	0.140703	0.248927	0.220053	0.248261	0.187743	0.17042	0.166676	0.0787401
coefficient of friction_µ	0.700215	1.5677	1.29444	1.78764	2.02249	0.226575	0.968421	0.169601	0.489673
coefficient of friction_µ_error	0.699876	0.540049	0.712379	0.618483	0.555922	0.430276	0.363203	0.239053	0.13611
friction angle_degree
COHESION: 100-400 kPa normal stress
mean of temperature class_degree	-9.96	-7.96	-6.06	-4.94	-4.15	-3.05	-2.17	-1.07	-0.51
temperature_degree_error	0.420073	0.140703	0.248927	0.220053	0.248261	0.187743	0.17042	0.166676	0.0787401
cohesion_kPa	967.353	655.454	783.606	347.877	313.852	589.248	285.203	345.264	85.9823
cohesion_kPa_error	199.717	144.183	199.877	164.231	155.458	104.477	101.081	64.7371	36.8093
Fig. 8b
temperature class_degree	-4	-3	-2	-1	-0.5
FRICTION: 100-800 kPa normal stress
mean of temperature class_degree	-4.11	-3.06	-2.15	-1.11	-0.51
temperature_degree_error	0.244752	0.253667	0.187861	0.168246	0.0978364
coefficient of friction_µ	0.652142	0.211443	0.375354	0.288345	0.250827
coefficient of friction_µ_error	0.280618	0.122206	0.168445	0.0930702	0.0793556
COHESION: 100-800 kPa normal stress
mean of temperature class_degree	-4.11	-3.06	-2.15	-1.11	-0.51
temperature_degree_error	0.244752	0.253667	0.187861	0.168246	0.0978364
cohesion_kPa	601.348	591.939	418.276	320.449	133.119
cohesion_kPa_error	130.879	58.9854	71.4516	43.0495	41.5353
