# Supplementary material for: A temperature- and stress-controlled failure criterion for ice-filledpermafrost rock joints
Source: Copernicus journal article supplement (doi:10.5194/tc-2018-57), 2018-03-28
Supplement: Supplementary file 1 [file tc-2018-57-supplement.zip › Suppl. material_Mamot et al/data_timeseries_acoustic_exp1b_WSK_spec4_Fig. S3.xlsx]

## Sheet: Sheet1
time_sec	hits_cumulative
20.2241	1
28.134	2
38.3179	3
67.3215	4
67.7753	5
68.4565	6
68.9089	7
71.8558	8
72.7612	9
73.4397	10
74.1183	11
77.5099	12
81.5765	13
81.8022	14
82.0278	15
82.2528	16
94.6389	17
95.542	18
95.9901	19
96.438	20
97.5566	21
97.7805	22
97.998	23
98.0043	24
98.2217	25
98.2276	26
98.4452	27
98.4509	28
98.6739	29
99.1146	30
99.3433	31
99.5606	32
99.5664	33
99.7834	34
99.7895	35
100.012	36
100.229	37
100.235	38
100.451	39
100.457	40
100.68	41
100.903	42
101.126	43
101.342	44
101.348	45
101.571	46
101.794	47
102.017	48
102.239	49
102.456	50
102.679	51
102.685	52
102.901	53
102.907	54
103.123	55
103.129	56
103.345	57
103.351	58
103.574	59
103.79	60
103.796	61
104.013	62
104.019	63
104.235	64
104.241	65
104.457	66
104.463	67
104.685	68
104.902	69
104.908	70
105.124	71
105.13	72
105.346	73
105.352	74
105.567	75
105.573	76
105.789	77
105.795	78
106.012	79
106.018	80
106.233	81
106.239	82
106.455	83
106.461	84
106.677	85
106.682	86
106.898	87
106.904	88
107.12	89
107.126	90
107.341	91
107.348	92
107.563	93
107.569	94
107.784	95
107.79	96
108.006	97
108.011	98
108.226	99
108.232	100
108.448	101
108.669	102
108.675	103
108.89	104
108.896	105
109.111	106
109.332	107
109.553	108
109.774	109
109.78	110
109.995	111
110.001	112
110.216	113
110.223	114
110.437	115
110.658	116
110.664	117
110.879	118
110.885	119
111.1	120
111.106	121
111.321	122
111.327	123
111.542	124
111.548	125
111.763	126
111.769	127
111.983	128
111.989	129
112.204	130
112.21	131
112.424	132
112.43	133
112.645	134
112.865	135
113.086	136
113.092	137
113.306	138
113.313	139
113.527	140
113.534	141
113.748	142
113.754	143
113.969	144
113.974	145
114.189	146
114.195	147
114.409	148
114.415	149
114.63	150
114.636	151
114.85	152
114.856	153
115.07	154
115.076	155
115.291	156
115.297	157
115.511	158
115.518	159
115.731	160
115.738	161
115.951	162
115.957	163
116.171	164
116.177	165
116.39	166
116.397	167
116.61	168
116.83	169
116.836	170
117.051	171
117.057	172
117.271	173
117.277	174
117.491	175
117.497	176
117.71	177
117.717	178
117.931	179
117.937	180
118.15	181
118.157	182
118.37	183
118.377	184
118.59	185
118.596	186
118.81	187
118.816	188
119.03	189
119.036	190
119.249	191
119.256	192
119.469	193
119.475	194
119.689	195
119.695	196
119.908	197
119.914	198
120.128	199
120.347	200
120.353	201
120.567	202
120.573	203
120.787	204
121.225	205
121.231	206
121.445	207
121.451	208
121.665	209
121.884	210
122.103	211
122.109	212
122.323	213
122.542	214
122.548	215
122.761	216
122.767	217
122.981	218
122.987	219
123.2	220
123.206	221
123.419	222
123.425	223
123.639	224
123.645	225
123.858	226
123.864	227
124.076	228
124.082	229
124.296	230
124.515	231
124.521	232
124.734	233
124.74	234
124.952	235
124.958	236
125.171	237
125.178	238
125.391	239
125.61	240
125.616	241
125.829	242
125.835	243
126.048	244
126.267	245
126.273	246
126.486	247
126.492	248
126.705	249
126.711	250
126.924	251
126.93	252
127.144	253
127.15	254
127.362	255
127.369	256
127.581	257
127.587	258
127.8	259
127.806	260
128.018	261
128.237	262
128.244	263
128.457	264
128.463	265
128.676	266
128.682	267
128.895	268
129.113	269
129.119	270
129.331	271
129.338	272
129.55	273
129.769	274
129.775	275
129.988	276
129.994	277
130.206	278
130.213	279
130.425	280
130.431	281
130.643	282
130.649	283
130.861	284
130.867	285
131.079	286
131.085	287
131.298	288
131.304	289
131.516	290
131.522	291
131.735	292
131.741	293
131.953	294
131.959	295
132.173	296
132.179	297
132.391	298
132.397	299
132.61	300
132.616	301
132.827	302
133.046	303
133.052	304
133.264	305
133.27	306
133.482	307
133.488	308
133.7	309
133.706	310
133.917	311
133.924	312
134.135	313
134.141	314
134.353	315
134.358	316
134.571	317
134.788	318
134.794	319
135.007	320
135.225	321
135.231	322
135.443	323
135.449	324
135.661	325
135.667	326
135.878	327
135.885	328
136.096	329
136.102	330
136.314	331
136.531	332
136.537	333
136.748	334
136.754	335
136.966	336
136.972	337
137.183	338
137.402	339
137.408	340
137.62	341
137.627	342
137.838	343
138.056	344
138.063	345
138.273	346
138.492	347
138.498	348
138.71	349
138.716	350
138.928	351
138.934	352
139.146	353
139.364	354
139.37	355
139.582	356
139.588	357
139.8	358
139.806	359
140.017	360
140.023	361
140.235	362
140.453	363
140.459	364
140.671	365
140.889	366
140.896	367
141.107	368
141.325	369
141.331	370
141.543	371
141.55	372
141.761	373
141.979	374
142.197	375
142.414	376
142.631	377
142.849	378
143.066	379
143.282	380
143.289	381
143.499	382
143.716	383
143.723	384
143.932	385
144.15	386
144.367	387
144.585	388
144.802	389
145.019	390
145.237	391
145.454	392
145.671	393
145.677	394
145.888	395
146.104	396
146.32	397
146.327	398
146.537	399
146.544	400
146.754	401
146.971	402
147.187	403
147.404	404
147.62	405
147.837	406
148.054	407
148.27	408
148.486	409
148.702	410
148.919	411
149.135	412
149.351	413
149.352	414
149.568	415
149.569	416
149.785	417
150.001	418
150.217	419
150.434	420
150.65	421
150.866	422
151.083	423
151.299	424
151.516	425
151.733	426
151.948	427
151.955	428
152.164	429
152.38	430
152.597	431
152.813	432
153.029	433
153.245	434
153.462	435
153.678	436
153.894	437
154.11	438
154.326	439
154.541	440
154.756	441
154.972	442
154.979	443
155.189	444
155.196	445
155.405	446
155.621	447
155.836	448
156.053	449
156.266	450
156.482	451
156.697	452
156.913	453
156.92	454
157.129	455
157.347	456
157.562	457
157.776	458
157.991	459
158.207	460
158.422	461
158.638	462
158.644	463
158.853	464
159.069	465
159.284	466
159.501	467
159.716	468
159.931	469
160.146	470
160.361	471
160.577	472
160.793	473
161.007	474
161.014	475
161.223	476
161.438	477
161.445	478
161.654	479
161.87	480
161.876	481
162.086	482
162.3	483
162.517	484
162.73	485
162.946	486
163.162	487
163.168	488
163.376	489
163.383	490
163.591	491
163.592	492
163.807	493
164.023	494
164.237	495
164.452	496
164.453	497
164.669	498
164.675	499
164.886	500
165.1	501
165.106	502
165.315	503
165.53	504
165.745	505
165.962	506
166.176	507
166.182	508
166.393	509
166.606	510
166.822	511
167.037	512
167.252	513
167.467	514
167.684	515
167.898	516
167.905	517
168.114	518
168.328	519
168.544	520
168.757	521
168.758	522
168.972	523
168.973	524
169.187	525
169.188	526
169.195	527
169.403	528
169.619	529
169.833	530
169.84	531
170.049	532
170.263	533
170.264	534
170.479	535
170.694	536
170.909	537
171.125	538
171.34	539
171.554	540
171.555	541
171.769	542
171.77	543
171.983	544
171.986	545
172.201	546
172.414	547
172.628	548
172.629	549
172.636	550
172.843	551
172.844	552
172.851	553
173.058	554
173.059	555
173.273	556
173.274	557
173.489	558
173.49	559
173.497	560
173.703	561
173.704	562
173.92	563
173.926	564
174.134	565
174.348	566
174.349	567
174.564	568
174.778	569
174.78	570
174.994	571
175.208	572
175.209	573
175.422	574
175.423	575
175.637	576
175.64	577
175.853	578
175.854	579
176.067	580
176.068	581
176.282	582
176.283	583
176.497	584
176.713	585
176.926	586
176.933	587
177.141	588
177.355	589
177.569	590
177.784	591
178.001	592
178.213	593
178.214	594
178.428	595
178.429	596
178.643	597
178.857	598
178.858	599
178.864	600
179.073	601
179.287	602
179.503	603
179.716	604
179.931	605
180.145	606
180.146	607
180.361	608
180.574	609
180.576	610
180.788	611
180.791	612
181.003	613
181.004	614
181.217	615
181.218	616
181.433	617
181.649	618
181.862	619
182.077	620
182.292	621
182.506	622
182.723	623
182.936	624
183.15	625
183.364	626
183.578	627
183.58	628
183.794	629
184.008	630
184.222	631
184.439	632
184.651	633
184.652	634
184.658	635
184.865	636
184.868	637
185.081	638
185.295	639
185.51	640
185.724	641
185.939	642
185.946	643
186.156	644
186.368	645
186.583	646
186.799	647
187.012	648
187.226	649
187.442	650
187.655	651
187.868	652
187.869	653
188.083	654
188.084	655
188.298	656
188.512	657
188.726	658
188.94	659
189.155	660
189.37	661
189.582	662
189.796	663
190.01	664
190.224	665
190.438	666
190.652	667
190.866	668
191.08	669
191.294	670
191.508	671
191.722	672
191.935	673
192.149	674
192.362	675
192.576	676
192.789	677
193.003	678
193.217	679
193.43	680
193.644	681
193.858	682
194.072	683
194.285	684
194.498	685
194.713	686
194.925	687
194.932	688
195.138	689
195.352	690
195.566	691
195.779	692
195.786	693
195.992	694
196.206	695
196.421	696
196.632	697
196.846	698
197.06	699
197.273	700
197.488	701
197.699	702
197.912	703
198.125	704
198.339	705
198.553	706
198.764	707
198.979	708
199.191	709
199.403	710
199.616	711
199.829	712
200.041	713
200.042	714
200.049	715
200.254	716
200.467	717
200.68	718
200.892	719
201.104	720
201.316	721
201.529	722
201.741	723
201.953	724
201.954	725
202.166	726
202.168	727
202.378	728
202.381	729
202.591	730
202.804	731
203.017	732
203.228	733
203.229	734
203.441	735
203.653	736
203.866	737
204.078	738
204.293	739
204.503	740
204.714	741
204.926	742
205.14	743
205.351	744
205.563	745
205.774	746
205.776	747
205.986	748
205.987	749
205.994	750
206.199	751
206.413	752
206.624	753
206.836	754
207.048	755
207.26	756
207.474	757
207.686	758
207.899	759
208.111	760
208.323	761
208.534	762
208.748	763
208.959	764
209.172	765
209.383	766
209.596	767
209.807	768
210.019	769
210.231	770
210.444	771
210.657	772
210.867	773
211.081	774
211.292	775
211.504	776
211.716	777
211.93	778
212.141	779
212.353	780
212.567	781
212.777	782
212.989	783
213.203	784
213.414	785
213.624	786
213.625	787
213.837	788
214.05	789
214.26	790
214.263	791
214.475	792
214.686	793
214.898	794
215.112	795
215.322	796
215.534	797
215.746	798
215.958	799
216.17	800
216.382	801
216.595	802
216.806	803
217.017	804
217.229	805
217.236	806
217.441	807
217.653	808
217.865	809
218.078	810
218.288	811
218.5	812
218.711	813
218.712	814
218.923	815
219.135	816
219.347	817
219.559	818
219.77	819
219.983	820
220.195	821
220.405	822
220.618	823
220.83	824
221.042	825
221.251	826
221.252	827
221.463	828
221.676	829
221.886	830
222.099	831
222.311	832
222.522	833
222.733	834
222.945	835
223.154	836
223.155	837
223.366	838
223.578	839
223.791	840
224.001	841
224.001	842
224.213	843
224.424	844
224.636	845
224.643	846
224.847	847
225.059	848
225.27	849
225.483	850
225.693	851
225.905	852
226.118	853
226.329	854
226.541	855
226.752	856
226.964	857
227.174	858
227.385	859
227.597	860
227.811	861
228.02	862
228.233	863
228.443	864
228.655	865
228.866	866
229.078	867
229.289	868
229.501	869
229.713	870
229.924	871
230.136	872
230.348	873
230.354	874
230.559	875
230.771	876
230.982	877
231.194	878
231.405	879
231.617	880
231.828	881
232.04	882
232.251	883
232.463	884
232.674	885
232.886	886
233.097	887
233.309	888
233.52	889
233.732	890
233.943	891
234.155	892
234.367	893
234.578	894
234.788	895
234.789	896
235.001	897
235.212	898
235.424	899
235.635	900
235.847	901
236.058	902
236.269	903
236.276	904
236.481	905
236.692	906
236.699	907
236.903	908
237.115	909
237.326	910
237.538	911
237.749	912
237.961	913
238.173	914
238.384	915
238.597	916
238.807	917
239.018	918
239.229	919
239.44	920
239.652	921
239.863	922
240.074	923
240.285	924
240.497	925
240.708	926
240.919	927
241.13	928
241.342	929
241.552	930
241.764	931
241.975	932
242.188	933
242.397	934
242.608	935
242.819	936
243.03	937
243.241	938
243.454	939
243.663	940
243.876	941
244.085	942
244.298	943
244.507	944
244.72	945
244.931	946
245.142	947
245.351	948
245.562	949
245.773	950
245.985	951
246.196	952
246.407	953
246.617	954
246.828	955
247.039	956
247.249	957
247.46	958
247.67	959
247.881	960
248.092	961
248.303	962
248.514	963
248.724	964
248.935	965
249.146	966
249.358	967
249.567	968
249.778	969
249.988	970
250.198	971
250.199	972
250.41	973
250.62	974
250.831	975
251.042	976
251.252	977
251.462	978
251.673	979
251.885	980
252.094	981
252.304	982
252.514	983
252.724	984
252.935	985
253.145	986
253.356	987
253.566	988
253.775	989
253.776	990
253.988	991
254.196	992
254.406	993
254.617	994
254.828	995
255.038	996
255.247	997
255.457	998
255.669	999
255.877	1000
256.087	1001
256.299	1002
256.507	1003
256.718	1004
256.927	1005
257.138	1006
257.348	1007
257.559	1008
257.767	1009
257.975	1010
258.184	1011
258.187	1012
258.394	1013
258.395	1014
258.606	1015
258.816	1016
259.026	1017
259.235	1018
259.442	1019
259.444	1020
259.654	1021
259.863	1022
260.071	1023
260.28	1024
260.282	1025
260.49	1026
260.7	1027
260.909	1028
261.118	1029
261.327	1030
261.538	1031
261.748	1032
261.956	1033
262.162	1034
262.163	1035
262.371	1036
262.372	1037
262.582	1038
262.789	1039
262.999	1040
263.01	1041
263.207	1042
263.417	1043
263.624	1044
263.625	1045
263.833	1046
263.834	1047
264.042	1048
264.043	1049
264.251	1050
264.252	1051
264.461	1052
264.473	1053
264.67	1054
264.877	1055
264.878	1056
265.087	1057
265.296	1058
265.504	1059
265.713	1060
265.92	1061
265.921	1062
266.13	1063
266.337	1064
266.338	1065
266.547	1066
266.754	1067
266.755	1068
266.965	1069
267.171	1070
267.172	1071
267.381	1072
267.588	1073
267.589	1074
267.601	1075
267.797	1076
268.005	1077
268.213	1078
268.421	1079
268.629	1080
268.837	1081
269.045	1082
269.252	1083
269.253	1084
269.46	1085
269.668	1086
269.876	1087
270.084	1088
270.292	1089
270.498	1090
270.499	1091
270.707	1092
270.916	1093
271.124	1094
271.331	1095
271.332	1096
271.539	1097
271.54	1098
271.748	1099
271.954	1100
271.955	1101
272.162	1102
272.163	1103
272.369	1104
272.37	1105
272.578	1106
272.785	1107
272.992	1108
272.992	1109
273.2	1110
273.407	1111
273.408	1112
273.614	1113
273.615	1114
273.822	1115
273.823	1116
274.031	1117
274.237	1118
274.24	1119
274.444	1120
274.445	1121
274.651	1122
274.652	1123
274.859	1124
274.86	1125
275.066	1126
275.067	1127
275.274	1128
275.48	1129
275.481	1130
275.689	1131
275.895	1132
275.896	1133
276.103	1134
276.104	1135
276.31	1136
276.517	1137
276.518	1138
276.724	1139
276.725	1140
276.932	1141
277.139	1142
277.14	1143
277.346	1144
277.347	1145
277.553	1146
277.556	1147
277.76	1148
277.761	1149
277.97	1150
278.174	1151
278.175	1152
278.381	1153
278.382	1154
278.587	1155
278.588	1156
278.795	1157
279.001	1158
279.002	1159
279.209	1160
279.415	1161
279.416	1162
279.622	1163
279.623	1164
279.831	1165
280.037	1166
280.038	1167
280.245	1168
280.245	1169
280.453	1170
280.659	1171
280.661	1172
280.866	1173
280.867	1174
281.073	1175
281.074	1176
281.28	1177
281.281	1178
281.488	1179
281.694	1180
281.695	1181
281.902	1182
282.108	1183
282.109	1184
282.316	1185
282.522	1186
282.523	1187
282.729	1188
282.73	1189
282.937	1190
283.143	1191
283.144	1192
283.35	1193
283.351	1194
283.557	1195
283.56	1196
283.765	1197
283.766	1198
283.974	1199
284.179	1200
284.18	1201
284.387	1202
284.389	1203
284.595	1204
284.801	1205
284.803	1206
285.008	1207
285.009	1208
285.216	1209
285.216	1210
285.422	1211
285.423	1212
285.63	1213
285.631	1214
285.837	1215
285.838	1216
286.044	1217
286.045	1218
286.251	1219
286.252	1220
286.458	1221
286.459	1222
286.665	1223
286.666	1224
286.872	1225
286.874	1226
287.08	1227
287.081	1228
287.287	1229
287.288	1230
287.495	1231
287.701	1232
287.704	1233
287.908	1234
287.911	1235
288.118	1236
288.322	1237
288.325	1238
288.53	1239
288.737	1240
288.738	1241
288.943	1242
288.944	1243
289.15	1244
289.151	1245
289.357	1246
289.36	1247
289.564	1248
289.565	1249
289.772	1250
289.773	1251
289.979	1252
289.98	1253
290.186	1254
290.189	1255
290.396	1256
290.601	1257
290.601	1258
290.808	1259
291.015	1260
291.016	1261
291.222	1262
291.223	1263
291.429	1264
291.431	1265
291.636	1266
291.639	1267
291.843	1268
291.844	1269
292.05	1270
292.052	1271
292.259	1272
292.464	1273
292.465	1274
292.671	1275
292.674	1276
292.881	1277
293.085	1278
293.088	1279
293.295	1280
293.502	1281
293.707	1282
293.71	1283
293.914	1284
293.915	1285
294.121	1286
294.124	1287
294.331	1288
294.535	1289
294.536	1290
294.745	1291
294.95	1292
294.953	1293
295.156	1294
295.159	1295
295.363	1296
295.366	1297
295.571	1298
295.572	1299
295.778	1300
295.781	1301
295.986	1302
295.987	1303
296.193	1304
296.194	1305
296.4	1306
296.401	1307
296.608	1308
296.61	1309
296.815	1310
296.817	1311
297.025	1312
297.231	1313
297.44	1314
297.644	1315
297.647	1316
297.852	1317
297.853	1318
298.06	1319
298.061	1320
298.269	1321
298.475	1322
298.478	1323
298.683	1324
298.684	1325
298.891	1326
299.1	1327
299.305	1328
299.306	1329
299.513	1330
299.514	1331
299.72	1332
299.721	1333
299.929	1334
300.138	1335
300.343	1336
300.347	1337
300.551	1338
300.552	1339
300.761	1340
300.965	1341
300.966	1342
301.172	1343
301.174	1344
301.381	1345
301.586	1346
301.587	1347
301.796	1348
302.001	1349
302.003	1350
302.208	1351
302.209	1352
302.415	1353
302.416	1354
302.622	1355
302.625	1356
302.83	1357
302.832	1358
303.037	1359
303.039	1360
303.244	1361
303.247	1362
303.451	1363
303.454	1364
303.658	1365
303.66	1366
303.866	1367
303.868	1368
304.074	1369
304.076	1370
304.282	1371
304.284	1372
304.49	1373
304.492	1374
304.697	1375
304.7	1376
304.905	1377
304.906	1378
305.113	1379
305.116	1380
305.321	1381
305.322	1382
305.529	1383
305.531	1384
305.738	1385
305.739	1386
305.947	1387
305.948	1388
306.158	1389
306.366	1390
306.577	1391
306.786	1392
306.992	1393
306.993	1394
307.202	1395
307.41	1396
307.411	1397
307.619	1398
307.827	1399
307.828	1400
308.037	1401
308.038	1402
308.247	1403
308.455	1404
308.666	1405
308.875	1406
309.082	1407
309.293	1408
309.5	1409
309.708	1410
309.709	1411
309.918	1412
310.127	1413
310.336	1414
310.546	1415
310.755	1416
310.963	1417
311.174	1418
311.382	1419
311.591	1420
311.801	1421
312.009	1422
312.219	1423
312.43	1424
312.639	1425
312.848	1426
313.056	1427
313.266	1428
313.476	1429
313.683	1430
313.686	1431
313.896	1432
314.105	1433
314.314	1434
314.524	1435
314.733	1436
314.941	1437
314.942	1438
315.153	1439
315.36	1440
315.363	1441
315.57	1442
315.573	1443
315.78	1444
315.781	1445
315.99	1446
315.991	1447
316.201	1448
316.41	1449
316.411	1450
316.621	1451
316.623	1452
316.831	1453
316.833	1454
317.04	1455
317.041	1456
317.25	1457
317.251	1458
317.46	1459
317.461	1460
317.67	1461
317.673	1462
317.88	1463
317.881	1464
318.091	1465
318.091	1466
318.301	1467
318.303	1468
318.511	1469
318.513	1470
318.721	1471
318.723	1472
318.932	1473
318.933	1474
319.142	1475
319.146	1476
319.353	1477
319.356	1478
319.564	1479
319.565	1480
319.776	1481
319.778	1482
319.987	1483
319.988	1484
320.198	1485
320.2	1486
320.409	1487
320.412	1488
320.62	1489
320.623	1490
320.831	1491
320.834	1492
321.043	1493
321.043	1494
321.254	1495
321.256	1496
321.465	1497
321.466	1498
321.677	1499
321.679	1500
321.888	1501
321.889	1502
322.099	1503
322.102	1504
322.31	1505
322.313	1506
322.522	1507
322.523	1508
322.734	1509
322.734	1510
322.945	1511
322.946	1512
323.157	1513
323.157	1514
323.368	1515
323.369	1516
323.579	1517
323.58	1518
323.791	1519
323.792	1520
324.002	1521
324.005	1522
324.213	1523
324.214	1524
324.425	1525
324.428	1526
324.635	1527
324.637	1528
324.846	1529
324.849	1530
325.057	1531
325.06	1532
325.269	1533
325.27	1534
325.48	1535
325.482	1536
325.691	1537
325.692	1538
325.902	1539
325.903	1540
326.114	1541
326.117	1542
326.325	1543
326.326	1544
326.537	1545
326.538	1546
326.748	1547
326.751	1548
326.959	1549
326.962	1550
327.171	1551
327.174	1552
327.382	1553
327.385	1554
327.593	1555
327.594	1556
327.804	1557
327.807	1558
328.016	1559
328.018	1560
328.227	1561
328.23	1562
328.439	1563
328.441	1564
328.65	1565
328.651	1566
328.862	1567
328.865	1568
329.073	1569
329.075	1570
329.287	1571
329.495	1572
329.498	1573
329.705	1574
329.708	1575
329.915	1576
329.918	1577
330.126	1578
330.127	1579
330.337	1580
330.339	1581
330.546	1582
330.549	1583
330.757	1584
330.76	1585
330.966	1586
330.969	1587
331.177	1588
331.179	1589
331.387	1590
331.388	1591
331.596	1592
331.597	1593
331.806	1594
331.809	1595
332.016	1596
332.019	1597
332.227	1598
332.23	1599
332.436	1600
332.438	1601
332.646	1602
332.65	1603
332.857	1604
332.86	1605
333.067	1606
333.068	1607
333.277	1608
333.279	1609
333.487	1610
333.49	1611
333.698	1612
333.701	1613
333.908	1614
333.91	1615
334.118	1616
334.121	1617
334.328	1618
334.331	1619
334.539	1620
334.542	1621
334.749	1622
334.752	1623
334.959	1624
334.961	1625
335.17	1626
335.173	1627
335.38	1628
335.381	1629
335.59	1630
335.594	1631
335.801	1632
335.804	1633
336.011	1634
336.014	1635
336.221	1636
336.222	1637
336.431	1638
336.434	1639
336.642	1640
336.643	1641
336.852	1642
336.853	1643
337.063	1644
337.065	1645
337.273	1646
337.274	1647
337.483	1648
337.486	1649
337.694	1650
337.695	1651
337.904	1652
337.905	1653
338.115	1654
338.116	1655
338.325	1656
338.328	1657
338.536	1658
338.537	1659
338.746	1660
338.747	1661
338.956	1662
338.957	1663
339.166	1664
339.167	1665
339.376	1666
339.379	1667
339.586	1668
339.587	1669
339.796	1670
339.797	1671
340.006	1672
340.007	1673
340.217	1674
340.218	1675
340.427	1676
340.429	1677
340.637	1678
340.64	1679
340.846	1680
340.847	1681
341.056	1682
341.057	1683
341.266	1684
341.268	1685
341.476	1686
341.478	1687
341.686	1688
341.687	1689
341.896	1690
341.897	1691
342.106	1692
342.107	1693
342.316	1694
342.317	1695
342.526	1696
342.526	1697
342.735	1698
342.736	1699
342.944	1700
342.945	1701
343.154	1702
343.156	1703
343.364	1704
343.365	1705
343.573	1706
343.574	1707
343.782	1708
343.784	1709
343.992	1710
343.995	1711
344.202	1712
344.205	1713
344.411	1714
344.414	1715
344.62	1716
344.621	1717
344.829	1718
344.832	1719
345.038	1720
345.042	1721
345.249	1722
345.257	1723
345.302	1724
345.302	1725
345.459	1726
345.464	1727
345.669	1728
345.88	1729
346.091	1730
346.301	1731
346.512	1732
346.722	1733
346.932	1734
347.142	1735
347.352	1736
347.561	1737
347.771	1738
347.981	1739
348.19	1740
348.399	1741
348.609	1742
348.818	1743
349.028	1744
349.237	1745
349.446	1746
349.656	1747
349.865	1748
350.075	1749
350.284	1750
350.493	1751
350.702	1752
350.911	1753
351.121	1754
351.33	1755
351.54	1756
351.749	1757
351.958	1758
352.167	1759
352.376	1760
352.586	1761
352.795	1762
353.004	1763
353.213	1764
353.422	1765
353.643	1766
353.896	1767
354.131	1768
354.348	1769
354.562	1770
354.774	1771
354.987	1772
355.199	1773
355.411	1774
355.623	1775
355.834	1776
356.046	1777
356.258	1778
356.47	1779
356.682	1780
356.894	1781
357.106	1782
357.318	1783
357.53	1784
357.742	1785
357.954	1786
358.588	1787
359.012	1788
359.224	1789
359.436	1790
359.647	1791
359.858	1792
360.069	1793
360.915	1794
361.126	1795
361.338	1796
361.973	1797
362.183	1798
362.395	1799
362.607	1800
363.029	1801
363.24	1802
363.662	1803
363.873	1804
364.084	1805
364.296	1806
364.507	1807
364.718	1808
364.93	1809
365.141	1810
365.353	1811
365.564	1812
365.775	1813
365.986	1814
366.197	1815
366.408	1816
366.619	1817
366.83	1818
367.041	1819
367.252	1820
367.463	1821
367.675	1822
367.886	1823
368.096	1824
368.308	1825
368.519	1826
368.73	1827
368.942	1828
369.153	1829
369.364	1830
369.575	1831
369.786	1832
369.996	1833
370.207	1834
370.418	1835
370.629	1836
370.84	1837
371.051	1838
371.262	1839
371.473	1840
371.684	1841
371.895	1842
372.107	1843
372.317	1844
372.528	1845
372.739	1846
372.95	1847
373.16	1848
373.372	1849
375.269	1850
375.692	1851
376.323	1852
378.432	1853
378.85	1854
379.064	1855
379.275	1856
379.485	1857
380.539	1858
380.749	1859
380.957	1860
381.17	1861
381.801	1862
382.219	1863
383.059	1864
383.479	1865
384.325	1866
384.532	1867
384.743	1868
384.953	1869
385.168	1870
385.586	1871
385.796	1872
386.006	1873
386.217	1874
386.428	1875
386.637	1876
386.848	1877
386.852	1878
387.058	1879
387.479	1880
387.689	1881
387.899	1882
388.109	1883
388.319	1884
388.529	1885
388.738	1886
388.948	1887
389.158	1888
389.368	1889
389.578	1890
389.789	1891
389.999	1892
390.208	1893
390.418	1894
390.628	1895
390.838	1896
391.047	1897
391.256	1898
391.465	1899
391.676	1900
391.885	1901
392.095	1902
392.305	1903
392.516	1904
392.726	1905
392.936	1906
393.146	1907
393.355	1908
393.566	1909
393.776	1910
393.985	1911
394.195	1912
394.405	1913
394.615	1914
394.824	1915
395.034	1916
395.243	1917
395.453	1918
395.663	1919
395.872	1920
396.082	1921
396.292	1922
396.501	1923
396.711	1924
396.921	1925
397.13	1926
397.34	1927
397.55	1928
397.97	1929
398.391	1930
398.81	1931
399.019	1932
399.23	1933
399.44	1934
399.859	1935
400.279	1936
401.117	1937
401.536	1938
401.745	1939
401.977	1940
402.441	1941
402.659	1942
402.873	1943
403.087	1944
403.3	1945
403.513	1946
403.726	1947
403.939	1948
404.152	1949
404.365	1950
404.578	1951
404.791	1952
405.004	1953
405.217	1954
405.43	1955
405.643	1956
405.855	1957
406.068	1958
406.28	1959
406.493	1960
406.705	1961
406.917	1962
407.129	1963
407.341	1964
407.553	1965
407.766	1966
407.978	1967
408.19	1968
408.402	1969
408.614	1970
408.826	1971
409.038	1972
409.249	1973
409.462	1974
409.885	1975
410.309	1976
410.519	1977
410.73	1978
410.942	1979
411.153	1980
411.364	1981
411.576	1982
411.787	1983
411.997	1984
412.208	1985
412.419	1986
412.629	1987
412.84	1988
413.051	1989
413.263	1990
413.473	1991
413.683	1992
414.105	1993
414.316	1994
414.737	1995
415.789	1996
416.001	1997
416.211	1998
416.422	1999
[truncated: 6,111 more rows]
