# Supplementary material for: A temperature- and stress-controlled failure criterion for ice-filledpermafrost rock joints
Source: Copernicus journal article supplement (doi:10.5194/tc-2018-57), 2018-03-28
Supplement: Supplementary file 1 [file tc-2018-57-supplement.zip › Suppl. material_Mamot et al/data_timeseries_acoustic_exp2b_WSK_spec3_Fig. S3.xlsx]

## Sheet: Sheet1
time_sec	hits_cumulative
16.4581	1
16.8621	2
17.0239	3
19.4081	4
20.0239	5
21.1402	6
21.1413	7
21.3462	8
23.7303	9
24.1483	10
29.8584	11
29.8595	12
29.9861	13
101.726	14
101.956	15
102.415	16
102.645	17
102.875	18
103.105	19
103.335	20
103.565	21
103.794	22
104.024	23
104.255	24
104.485	25
104.715	26
104.945	27
105.174	28
105.404	29
105.633	30
105.863	31
106.091	32
106.32	33
106.549	34
106.779	35
107.008	36
107.237	37
107.466	38
107.695	39
107.924	40
108.153	41
108.383	42
108.612	43
108.842	44
109.071	45
109.301	46
109.53	47
109.759	48
109.989	49
110.218	50
110.447	51
110.677	52
110.906	53
111.135	54
111.365	55
111.594	56
111.823	57
112.053	58
112.283	59
112.512	60
112.742	61
112.972	62
113.202	63
113.432	64
113.662	65
113.892	66
114.122	67
114.353	68
114.584	69
114.814	70
115.045	71
115.275	72
115.506	73
115.736	74
115.967	75
116.197	76
116.427	77
116.658	78
116.888	79
117.119	80
117.349	81
117.579	82
117.809	83
118.04	84
118.27	85
118.5	86
118.73	87
118.961	88
119.191	89
119.421	90
119.651	91
119.881	92
120.111	93
120.342	94
120.572	95
120.802	96
121.032	97
121.262	98
121.492	99
121.722	100
121.951	101
122.181	102
122.411	103
122.641	104
122.871	105
123.101	106
123.331	107
123.561	108
123.792	109
124.022	110
124.252	111
124.482	112
124.711	113
124.941	114
125.172	115
125.402	116
125.632	117
125.861	118
126.092	119
126.322	120
126.552	121
126.783	122
127.013	123
127.243	124
127.473	125
127.704	126
127.934	127
128.164	128
128.394	129
128.624	130
128.854	131
129.084	132
129.314	133
129.544	134
129.774	135
130.004	136
130.233	137
130.463	138
130.693	139
130.924	140
131.153	141
131.383	142
131.612	143
131.842	144
132.072	145
132.302	146
132.532	147
132.762	148
132.991	149
133.221	150
133.45	151
133.68	152
133.91	153
134.14	154
134.369	155
134.599	156
134.828	157
135.058	158
135.288	159
135.517	160
135.746	161
135.975	162
136.205	163
136.435	164
136.664	165
136.893	166
137.123	167
137.353	168
137.582	169
137.812	170
138.041	171
138.271	172
138.501	173
138.73	174
138.959	175
139.189	176
139.419	177
139.648	178
139.878	179
140.107	180
140.337	181
140.566	182
140.795	183
141.025	184
141.254	185
141.484	186
141.713	187
141.943	188
142.172	189
142.402	190
142.632	191
142.861	192
143.09	193
143.32	194
143.55	195
143.779	196
144.009	197
144.239	198
144.468	199
144.698	200
144.927	201
145.157	202
145.386	203
145.616	204
145.845	205
146.076	206
146.305	207
146.534	208
146.764	209
146.994	210
147.223	211
147.453	212
147.683	213
147.912	214
148.142	215
148.371	216
148.6	217
148.83	218
149.059	219
149.289	220
149.518	221
149.748	222
149.977	223
150.207	224
150.437	225
150.666	226
150.896	227
151.125	228
151.355	229
151.584	230
151.814	231
152.043	232
152.273	233
152.503	234
152.733	235
152.962	236
153.192	237
153.422	238
153.651	239
153.881	240
154.111	241
154.341	242
154.569	243
154.571	244
154.8	245
155.03	246
155.26	247
155.49	248
155.72	249
155.95	250
156.18	251
156.41	252
156.64	253
156.869	254
157.099	255
157.329	256
157.559	257
157.788	258
158.018	259
158.248	260
158.477	261
158.707	262
158.937	263
159.167	264
159.397	265
159.627	266
159.857	267
160.087	268
160.317	269
160.547	270
160.777	271
161.007	272
161.237	273
161.467	274
161.697	275
161.928	276
162.158	277
162.388	278
162.618	279
162.848	280
163.077	281
163.307	282
163.537	283
163.767	284
163.996	285
164.226	286
164.456	287
164.686	288
164.916	289
165.146	290
165.376	291
165.377	292
165.607	293
165.837	294
166.067	295
166.297	296
166.527	297
166.757	298
166.987	299
167.217	300
167.447	301
167.677	302
167.907	303
168.137	304
168.367	305
168.597	306
168.826	307
168.827	308
169.057	309
169.287	310
169.517	311
169.748	312
169.978	313
170.208	314
170.438	315
170.668	316
170.898	317
171.128	318
171.357	319
171.358	320
171.587	321
171.588	322
171.818	323
172.048	324
172.279	325
172.509	326
172.738	327
172.968	328
172.969	329
173.199	330
173.887	331
173.888	332
174.118	333
174.348	334
174.576	335
174.578	336
174.806	337
174.807	338
175.037	339
175.267	340
175.497	341
175.727	342
175.958	343
176.187	344
176.417	345
176.647	346
176.877	347
177.107	348
177.335	349
177.336	350
177.566	351
177.796	352
178.026	353
178.256	354
178.486	355
178.714	356
178.715	357
178.945	358
179.175	359
179.405	360
179.634	361
179.864	362
180.092	363
180.093	364
180.322	365
180.323	366
180.552	367
180.781	368
181.01	369
181.24	370
181.469	371
181.699	372
181.929	373
182.158	374
182.388	375
182.617	376
182.618	377
182.847	378
182.848	379
183.078	380
183.307	381
183.536	382
183.537	383
183.766	384
183.767	385
183.997	386
184.226	387
184.227	388
184.455	389
184.456	390
184.686	391
184.916	392
185.375	393
185.604	394
185.833	395
186.063	396
186.291	397
186.521	398
186.749	399
186.75	400
186.98	401
187.208	402
187.209	403
187.438	404
187.439	405
187.668	406
187.898	407
188.126	408
188.127	409
188.586	410
188.815	411
189.043	412
189.044	413
189.274	414
189.503	415
189.732	416
189.96	417
190.188	418
190.189	419
190.417	420
190.646	421
190.877	422
191.104	423
191.105	424
191.335	425
191.565	426
191.794	427
192.023	428
192.023	429
192.251	430
192.48	431
192.481	432
192.711	433
192.941	434
193.169	435
193.172	436
193.398	437
193.399	438
193.627	439
193.858	440
194.086	441
194.089	442
194.317	443
194.546	444
194.776	445
195.005	446
195.233	447
195.462	448
195.693	449
195.921	450
196.15	451
196.15	452
196.379	453
196.61	454
196.837	455
196.837	456
196.84	457
197.066	458
197.066	459
197.295	460
197.296	461
197.524	462
197.524	463
197.754	464
197.985	465
198.213	466
198.671	467
198.671	468
198.901	469
198.901	470
199.13	471
199.36	472
199.36	473
199.589	474
199.591	475
199.818	476
200.047	477
200.05	478
200.276	479
200.277	480
200.279	481
200.505	482
200.509	483
200.738	484
200.964	485
200.967	486
201.195	487
201.196	488
201.424	489
201.881	490
201.884	491
202.112	492
202.343	493
202.571	494
202.8	495
202.803	496
203.031	497
203.259	498
203.487	499
203.49	500
203.718	501
203.72	502
203.949	503
204.176	504
204.405	505
204.408	506
204.634	507
204.637	508
204.866	509
204.869	510
205.324	511
205.554	512
205.554	513
205.557	514
205.782	515
205.785	516
206.011	517
206.014	518
206.242	519
206.245	520
206.47	521
206.472	522
206.473	523
206.703	524
206.929	525
206.932	526
207.159	527
207.162	528
207.389	529
207.39	530
207.392	531
207.619	532
207.85	533
208.077	534
208.078	535
208.081	536
208.305	537
208.308	538
208.536	539
208.538	540
208.767	541
208.995	542
208.995	543
209.224	544
209.455	545
209.682	546
209.685	547
209.912	548
209.912	549
209.915	550
210.141	551
210.142	552
210.371	553
210.372	554
210.599	555
210.602	556
210.83	557
210.833	558
211.059	559
211.059	560
211.062	561
211.288	562
211.291	563
211.518	564
211.747	565
211.747	566
211.75	567
211.975	568
211.978	569
212.204	570
212.207	571
212.434	572
212.435	573
212.437	574
212.664	575
212.665	576
212.667	577
212.893	578
212.896	579
213.123	580
213.126	581
213.354	582
213.584	583
213.814	584
214.041	585
214.043	586
214.044	587
214.271	588
214.274	589
214.5	590
214.502	591
214.503	592
214.731	593
214.732	594
214.734	595
214.962	596
214.964	597
215.19	598
215.193	599
215.42	600
215.422	601
215.423	602
215.65	603
215.652	604
215.653	605
215.88	606
215.883	607
216.112	608
216.113	609
216.34	610
216.343	611
216.57	612
216.572	613
216.573	614
216.8	615
216.803	616
217.03	617
217.033	618
217.259	619
217.261	620
217.263	621
217.494	622
217.719	623
217.722	624
217.949	625
217.95	626
217.952	627
218.18	628
218.18	629
218.183	630
218.41	631
218.413	632
218.638	633
218.641	634
218.869	635
218.872	636
219.098	637
219.101	638
219.327	639
219.33	640
219.558	641
219.558	642
219.561	643
219.787	644
219.79	645
220.017	646
220.02	647
220.25	648
220.48	649
220.707	650
220.71	651
220.937	652
220.938	653
220.94	654
221.167	655
221.168	656
221.17	657
221.399	658
221.402	659
221.628	660
221.629	661
221.631	662
221.859	663
221.859	664
221.862	665
222.087	666
222.091	667
222.317	668
222.32	669
222.547	670
222.55	671
222.777	672
222.778	673
222.78	674
223.007	675
223.01	676
223.237	677
223.24	678
223.467	679
223.47	680
223.697	681
223.699	682
223.7	683
223.927	684
223.93	685
224.156	686
224.159	687
224.386	688
224.389	689
224.616	690
224.619	691
224.846	692
224.85	693
225.076	694
225.079	695
225.306	696
225.307	697
225.309	698
225.535	699
225.537	700
225.538	701
225.765	702
225.768	703
225.995	704
225.998	705
226.224	706
226.227	707
226.454	708
226.457	709
226.683	710
226.686	711
226.913	712
226.914	713
226.916	714
227.142	715
227.144	716
227.145	717
227.372	718
227.375	719
227.602	720
227.605	721
227.831	722
227.833	723
227.834	724
228.061	725
228.064	726
228.294	727
228.521	728
228.524	729
228.751	730
228.753	731
228.754	732
228.981	733
228.985	734
229.211	735
229.214	736
229.441	737
229.442	738
229.444	739
229.671	740
229.672	741
229.674	742
229.901	743
229.902	744
229.904	745
230.131	746
230.133	747
230.134	748
230.361	749
230.362	750
230.364	751
230.591	752
230.592	753
230.594	754
230.82	755
230.822	756
230.823	757
231.05	758
231.052	759
231.053	760
231.28	761
231.282	762
231.283	763
231.51	764
231.513	765
231.74	766
231.743	767
231.97	768
231.973	769
232.2	770
232.203	771
232.433	772
232.662	773
232.892	774
233.119	775
233.122	776
233.349	777
233.352	778
233.58	779
233.583	780
233.81	781
233.813	782
234.04	783
234.043	784
234.27	785
234.273	786
234.5	787
234.503	788
234.729	789
234.731	790
234.732	791
234.959	792
234.962	793
235.19	794
235.193	795
235.421	796
235.421	797
235.649	798
235.651	799
235.652	800
235.879	801
235.881	802
235.883	803
236.11	804
236.113	805
236.34	806
236.343	807
236.57	808
236.573	809
236.801	810
236.804	811
237.031	812
237.032	813
237.034	814
237.261	815
237.263	816
237.264	817
237.492	818
237.495	819
237.723	820
237.726	821
237.954	822
237.957	823
238.185	824
238.186	825
238.188	826
238.416	827
238.419	828
238.647	829
238.65	830
238.877	831
238.88	832
239.107	833
239.109	834
239.11	835
239.338	836
239.339	837
239.341	838
239.568	839
239.569	840
239.571	841
239.798	842
239.8	843
239.801	844
240.028	845
240.031	846
240.259	847
240.261	848
240.262	849
240.49	850
240.492	851
240.493	852
240.721	853
240.723	854
240.724	855
240.952	856
240.955	857
241.182	858
241.185	859
241.414	860
241.416	861
241.643	862
241.645	863
241.646	864
241.874	865
241.876	866
242.103	867
242.105	868
242.106	869
242.334	870
242.335	871
242.337	872
242.567	873
242.796	874
242.798	875
243.025	876
243.027	877
243.028	878
243.257	879
243.26	880
243.487	881
243.489	882
243.49	883
243.719	884
243.721	885
243.95	886
243.951	887
244.179	888
244.18	889
244.182	890
244.409	891
244.412	892
244.639	893
244.643	894
244.87	895
244.872	896
244.873	897
245.1	898
245.103	899
245.331	900
245.334	901
245.561	902
245.563	903
245.564	904
245.792	905
245.793	906
245.795	907
246.022	908
246.024	909
246.025	910
246.253	911
246.256	912
246.483	913
246.486	914
246.714	915
246.717	916
246.944	917
246.946	918
246.947	919
247.176	920
247.178	921
247.405	922
247.408	923
247.635	924
247.636	925
247.638	926
247.865	927
247.866	928
247.868	929
248.094	930
248.097	931
248.325	932
248.326	933
248.328	934
248.555	935
248.557	936
248.558	937
248.786	938
248.788	939
248.789	940
249.018	941
249.019	942
249.021	943
249.249	944
249.25	945
249.252	946
249.479	947
249.481	948
249.483	949
249.71	950
249.712	951
249.713	952
249.941	953
249.944	954
250.172	955
250.175	956
250.403	957
250.406	958
250.633	959
250.636	960
250.864	961
250.865	962
250.867	963
251.095	964
251.096	965
251.098	966
251.329	967
251.556	968
251.558	969
251.559	970
251.787	971
251.79	972
252.018	973
252.02	974
252.021	975
252.249	976
252.25	977
252.252	978
252.479	979
252.481	980
252.483	981
252.71	982
252.713	983
252.941	984
252.942	985
252.944	986
253.171	987
253.174	988
253.402	989
253.403	990
253.405	991
253.633	992
253.634	993
253.636	994
253.863	995
253.865	996
253.866	997
254.094	998
254.095	999
254.097	1000
254.325	1001
254.326	1002
254.328	1003
254.555	1004
254.557	1005
254.558	1006
254.786	1007
254.789	1008
255.017	1009
255.018	1010
255.02	1011
255.247	1012
255.25	1013
255.478	1014
255.48	1015
255.481	1016
255.709	1017
255.712	1018
255.939	1019
255.94	1020
255.942	1021
256.169	1022
256.171	1023
256.172	1024
256.4	1025
256.403	1026
256.63	1027
256.632	1028
256.633	1029
256.862	1030
256.864	1031
257.091	1032
257.093	1033
257.094	1034
257.322	1035
257.325	1036
257.553	1037
257.556	1038
257.784	1039
257.787	1040
258.014	1041
258.016	1042
258.017	1043
258.245	1044
258.248	1045
258.475	1046
258.477	1047
258.479	1048
258.706	1049
258.709	1050
258.94	1051
259.168	1052
259.169	1053
259.171	1054
259.398	1055
259.401	1056
259.629	1057
259.631	1058
259.632	1059
259.86	1060
259.863	1061
260.09	1062
260.092	1063
260.093	1064
260.321	1065
260.324	1066
260.552	1067
260.553	1068
260.555	1069
260.782	1070
260.784	1071
260.785	1072
261.013	1073
261.014	1074
261.016	1075
261.244	1076
261.245	1077
261.247	1078
261.475	1079
261.478	1080
261.706	1081
261.707	1082
261.709	1083
261.937	1084
261.94	1085
262.167	1086
262.169	1087
262.171	1088
262.398	1089
262.401	1090
262.629	1091
262.631	1092
262.632	1093
262.86	1094
262.862	1095
262.863	1096
263.091	1097
263.092	1098
263.094	1099
263.322	1100
263.323	1101
263.325	1102
263.553	1103
263.554	1104
263.556	1105
263.783	1106
263.785	1107
263.786	1108
264.014	1109
264.015	1110
264.017	1111
264.245	1112
264.248	1113
264.476	1114
264.479	1115
264.707	1116
264.71	1117
264.937	1118
264.939	1119
264.94	1120
265.168	1121
265.172	1122
265.399	1123
265.403	1124
265.63	1125
265.633	1126
265.861	1127
265.862	1128
265.864	1129
266.092	1130
266.093	1131
266.095	1132
266.322	1133
266.324	1134
266.325	1135
266.553	1136
266.556	1137
266.784	1138
266.787	1139
267.015	1140
267.017	1141
267.018	1142
267.246	1143
267.249	1144
267.477	1145
267.48	1146
267.707	1147
267.71	1148
267.938	1149
267.939	1150
267.941	1151
268.169	1152
268.172	1153
268.4	1154
268.401	1155
268.403	1156
268.63	1157
268.634	1158
268.861	1159
268.863	1160
268.864	1161
269.092	1162
269.094	1163
269.095	1164
269.323	1165
269.325	1166
269.327	1167
269.554	1168
269.557	1169
269.785	1170
269.788	1171
270.015	1172
270.019	1173
270.246	1174
270.249	1175
270.477	1176
270.478	1177
270.48	1178
270.707	1179
270.71	1180
270.938	1181
270.942	1182
271.169	1183
271.172	1184
271.4	1185
271.401	1186
271.403	1187
271.631	1188
271.634	1189
271.862	1190
271.865	1191
272.093	1192
272.094	1193
272.096	1194
272.323	1195
272.325	1196
272.327	1197
272.554	1198
272.556	1199
272.557	1200
272.785	1201
272.786	1202
272.788	1203
273.015	1204
273.017	1205
273.018	1206
273.246	1207
273.249	1208
273.476	1209
273.478	1210
273.48	1211
273.707	1212
273.71	1213
273.938	1214
273.939	1215
273.941	1216
274.168	1217
274.171	1218
274.399	1219
274.402	1220
274.63	1221
274.633	1222
274.86	1223
274.862	1224
274.863	1225
275.091	1226
275.094	1227
275.321	1228
275.324	1229
275.552	1230
275.555	1231
275.783	1232
275.784	1233
275.786	1234
276.014	1235
276.017	1236
276.245	1237
276.246	1238
276.248	1239
276.476	1240
276.479	1241
276.707	1242
276.708	1243
276.71	1244
276.938	1245
276.939	1246
276.941	1247
277.169	1248
277.17	1249
277.172	1250
277.4	1251
277.402	1252
277.404	1253
277.631	1254
277.633	1255
277.635	1256
277.863	1257
277.864	1258
277.866	1259
278.094	1260
278.096	1261
278.097	1262
278.326	1263
278.329	1264
278.557	1265
278.56	1266
278.789	1267
278.79	1268
278.792	1269
279.021	1270
279.024	1271
279.253	1272
279.254	1273
279.256	1274
279.484	1275
279.485	1276
279.487	1277
279.716	1278
279.717	1279
279.719	1280
279.947	1281
279.951	1282
280.179	1283
280.18	1284
280.182	1285
280.41	1286
280.411	1287
280.413	1288
280.642	1289
280.645	1290
280.874	1291
280.877	1292
281.106	1293
281.107	1294
281.109	1295
281.338	1296
281.341	1297
281.57	1298
281.572	1299
281.574	1300
281.803	1301
281.806	1302
282.035	1303
282.038	1304
282.267	1305
282.271	1306
282.5	1307
282.503	1308
282.732	1309
282.735	1310
282.965	1311
282.968	1312
283.198	1313
283.201	1314
283.431	1315
283.434	1316
283.664	1317
283.667	1318
283.897	1319
283.9	1320
284.129	1321
284.131	1322
284.133	1323
284.362	1324
284.595	1325
284.597	1326
284.598	1327
284.828	1328
284.831	1329
285.062	1330
285.063	1331
285.065	1332
285.295	1333
285.296	1334
285.298	1335
285.528	1336
285.529	1337
285.531	1338
285.761	1339
285.764	1340
285.994	1341
285.997	1342
286.227	1343
286.228	1344
286.23	1345
286.461	1346
286.464	1347
286.694	1348
286.695	1349
286.697	1350
286.927	1351
286.929	1352
286.931	1353
287.161	1354
287.164	1355
287.395	1356
287.399	1357
287.629	1358
287.63	1359
287.632	1360
287.862	1361
287.863	1362
287.865	1363
288.096	1364
288.098	1365
288.1	1366
288.331	1367
288.332	1368
288.334	1369
288.566	1370
288.568	1371
288.569	1372
288.801	1373
288.804	1374
289.036	1375
289.039	1376
289.271	1377
289.274	1378
289.506	1379
289.51	1380
289.742	1381
289.743	1382
289.745	1383
289.978	1384
289.98	1385
289.983	1386
290.214	1387
290.217	1388
290.448	1389
290.451	1390
290.683	1391
290.685	1392
290.686	1393
290.919	1394
290.922	1395
291.155	1396
291.159	1397
291.391	1398
291.395	1399
291.627	1400
291.628	1401
291.63	1402
291.864	1403
291.867	1404
292.098	1405
292.101	1406
292.334	1407
292.337	1408
292.57	1409
292.572	1410
292.575	1411
292.806	1412
292.808	1413
293.043	1414
293.046	1415
293.279	1416
293.281	1417
293.515	1418
293.516	1419
293.752	1420
293.753	1421
293.755	1422
293.988	1423
293.993	1424
294.225	1425
294.228	1426
294.462	1427
294.463	1428
294.465	1429
294.699	1430
294.701	1431
294.702	1432
294.936	1433
294.94	1434
295.174	1435
295.177	1436
295.411	1437
295.412	1438
295.414	1439
295.648	1440
295.649	1441
295.651	1442
295.885	1443
295.886	1444
295.888	1445
296.123	1446
296.126	1447
296.36	1448
296.361	1449
296.597	1450
296.599	1451
296.6	1452
296.835	1453
296.838	1454
297.073	1455
297.076	1456
297.31	1457
297.313	1458
297.548	1459
297.551	1460
297.785	1461
297.787	1462
297.788	1463
298.023	1464
298.026	1465
298.26	1466
298.498	1467
298.501	1468
298.735	1469
298.738	1470
298.973	1471
299.21	1472
299.213	1473
299.447	1474
299.684	1475
299.921	1476
299.923	1477
299.924	1478
300.159	1479
300.163	1480
300.396	1481
300.401	1482
300.633	1483
300.635	1484
300.87	1485
301.107	1486
301.109	1487
301.344	1488
301.346	1489
301.583	1490
301.584	1491
301.586	1492
301.82	1493
301.822	1494
302.058	1495
302.059	1496
302.061	1497
302.296	1498
302.535	1499
302.536	1500
302.773	1501
302.775	1502
302.776	1503
303.011	1504
303.25	1505
303.251	1506
303.488	1507
303.49	1508
303.493	1509
303.727	1510
303.731	1511
303.965	1512
303.967	1513
303.968	1514
304.204	1515
304.205	1516
304.208	1517
304.442	1518
304.681	1519
304.919	1520
304.922	1521
305.158	1522
305.396	1523
305.397	1524
305.4	1525
305.634	1526
305.636	1527
305.639	1528
305.872	1529
306.111	1530
306.112	1531
306.114	1532
306.349	1533
306.354	1534
306.588	1535
306.589	1536
306.592	1537
306.826	1538
307.065	1539
307.066	1540
307.303	1541
307.305	1542
307.542	1543
307.543	1544
307.546	1545
307.78	1546
308.018	1547
308.256	1548
308.258	1549
308.495	1550
308.498	1551
308.734	1552
308.735	1553
308.739	1554
308.972	1555
308.974	1556
308.975	1557
309.21	1558
309.212	1559
309.449	1560
309.687	1561
309.926	1562
309.927	1563
310.164	1564
310.169	1565
310.402	1566
310.404	1567
310.641	1568
310.642	1569
310.644	1570
310.88	1571
310.881	1572
311.118	1573
311.12	1574
311.121	1575
311.357	1576
311.358	1577
311.596	1578
311.597	1579
311.835	1580
311.836	1581
311.838	1582
312.073	1583
312.074	1584
312.078	1585
312.312	1586
312.551	1587
312.79	1588
313.029	1589
313.03	1590
313.267	1591
313.269	1592
313.27	1593
313.506	1594
313.507	1595
313.511	1596
313.745	1597
313.746	1598
313.984	1599
313.988	1600
314.223	1601
314.462	1602
314.7	1603
314.702	1604
314.939	1605
314.941	1606
315.178	1607
315.18	1608
315.417	1609
315.419	1610
315.422	1611
315.656	1612
315.895	1613
315.897	1614
315.898	1615
316.134	1616
316.137	1617
316.373	1618
316.375	1619
316.613	1620
316.852	1621
316.856	1622
317.091	1623
317.33	1624
317.331	1625
317.569	1626
317.573	1627
317.808	1628
317.81	1629
318.047	1630
318.05	1631
318.286	1632
318.288	1633
318.289	1634
318.525	1635
318.527	1636
318.764	1637
318.769	1638
319.003	1639
319.004	1640
319.242	1641
319.243	1642
319.481	1643
319.486	1644
319.72	1645
319.725	1646
319.959	1647
320.199	1648
320.438	1649
320.677	1650
320.679	1651
320.917	1652
320.918	1653
321.157	1654
321.158	1655
321.161	1656
321.396	1657
321.397	1658
321.635	1659
321.874	1660
322.113	1661
322.117	1662
322.352	1663
322.591	1664
322.831	1665
322.832	1666
323.07	1667
323.071	1668
323.31	1669
323.549	1670
323.551	1671
323.553	1672
323.788	1673
323.789	1674
324.027	1675
324.028	1676
324.266	1677
324.268	1678
324.27	1679
324.506	1680
324.508	1681
324.746	1682
324.748	1683
324.986	1684
324.987	1685
325.225	1686
325.23	1687
325.465	1688
325.467	1689
325.705	1690
325.944	1691
326.184	1692
326.187	1693
326.423	1694
326.663	1695
326.665	1696
326.903	1697
326.904	1698
326.906	1699
327.143	1700
327.144	1701
327.146	1702
327.382	1703
327.384	1704
327.622	1705
327.862	1706
327.864	1707
328.102	1708
328.104	1709
328.342	1710
328.582	1711
328.583	1712
328.822	1713
329.061	1714
329.301	1715
329.541	1716
329.781	1717
329.782	1718
330.021	1719
330.022	1720
330.261	1721
330.263	1722
330.501	1723
330.503	1724
330.504	1725
330.741	1726
330.743	1727
330.981	1728
330.983	1729
330.984	1730
331.221	1731
331.224	1732
331.461	1733
331.462	1734
331.701	1735
331.704	1736
331.941	1737
332.181	1738
332.182	1739
332.421	1740
332.422	1741
332.661	1742
332.901	1743
332.903	1744
332.904	1745
333.142	1746
333.143	1747
333.145	1748
333.382	1749
333.383	1750
333.622	1751
333.624	1752
333.625	1753
333.862	1754
333.864	1755
333.867	1756
334.102	1757
334.104	1758
334.342	1759
334.344	1760
334.345	1761
334.583	1762
334.584	1763
334.823	1764
334.825	1765
335.063	1766
335.065	1767
335.304	1768
335.305	1769
335.544	1770
335.546	1771
335.785	1772
335.786	1773
335.788	1774
336.025	1775
336.028	1776
336.266	1777
336.268	1778
336.506	1779
336.508	1780
336.747	1781
336.748	1782
336.987	1783
336.989	1784
336.99	1785
337.227	1786
337.229	1787
337.468	1788
337.469	1789
337.708	1790
337.71	1791
337.711	1792
337.949	1793
337.95	1794
338.189	1795
338.429	1796
338.67	1797
338.671	1798
338.911	1799
338.912	1800
339.151	1801
339.391	1802
339.393	1803
339.632	1804
339.634	1805
339.635	1806
339.873	1807
339.874	1808
340.114	1809
340.115	1810
340.117	1811
340.354	1812
340.356	1813
340.359	1814
340.596	1815
340.597	1816
340.836	1817
340.838	1818
341.077	1819
341.078	1820
341.318	1821
341.319	1822
341.559	1823
341.56	1824
341.8	1825
341.801	1826
342.04	1827
342.041	1828
342.281	1829
342.283	1830
342.522	1831
342.523	1832
342.525	1833
342.763	1834
342.764	1835
343.004	1836
343.006	1837
343.245	1838
343.247	1839
343.486	1840
343.488	1841
343.728	1842
343.729	1843
343.969	1844
343.97	1845
344.21	1846
344.211	1847
344.451	1848
344.452	1849
344.692	1850
344.693	1851
344.934	1852
344.935	1853
345.175	1854
345.176	1855
345.178	1856
345.415	1857
345.417	1858
345.42	1859
345.656	1860
345.658	1861
345.898	1862
345.899	1863
346.139	1864
346.141	1865
346.381	1866
346.382	1867
346.622	1868
346.623	1869
346.863	1870
346.865	1871
347.104	1872
347.106	1873
347.109	1874
347.346	1875
347.347	1876
347.351	1877
347.587	1878
347.588	1879
347.592	1880
347.828	1881
347.83	1882
347.833	1883
348.069	1884
348.071	1885
348.072	1886
348.31	1887
348.552	1888
348.553	1889
348.793	1890
348.795	1891
348.798	1892
349.035	1893
349.036	1894
349.039	1895
349.277	1896
349.278	1897
349.518	1898
349.52	1899
349.521	1900
349.76	1901
349.761	1902
350.001	1903
350.003	1904
350.243	1905
350.244	1906
350.484	1907
350.725	1908
350.727	1909
350.73	1910
350.967	1911
350.968	1912
351.208	1913
351.21	1914
351.45	1915
351.452	1916
351.692	1917
351.693	1918
351.697	1919
351.933	1920
352.174	1921
352.416	1922
352.417	1923
352.657	1924
352.659	1925
352.898	1926
352.9	1927
352.903	1928
353.14	1929
353.143	1930
353.382	1931
353.622	1932
353.625	1933
353.864	1934
354.107	1935
354.108	1936
354.35	1937
354.351	1938
354.589	1939
354.591	1940
354.832	1941
354.833	1942
355.074	1943
355.315	1944
355.556	1945
355.559	1946
355.797	1947
355.799	1948
356.039	1949
356.04	1950
356.281	1951
356.282	1952
356.522	1953
356.523	1954
356.763	1955
356.765	1956
357.005	1957
357.007	1958
357.248	1959
357.249	1960
357.491	1961
357.734	1962
357.735	1963
357.738	1964
357.977	1965
358.217	1966
358.218	1967
358.458	1968
358.459	1969
358.461	1970
358.7	1971
358.704	1972
358.941	1973
358.943	1974
358.946	1975
359.183	1976
359.424	1977
359.426	1978
359.666	1979
359.667	1980
359.908	1981
359.909	1982
360.15	1983
360.391	1984
360.392	1985
360.632	1986
360.874	1987
360.875	1988
361.115	1989
361.117	1990
361.357	1991
361.599	1992
361.84	1993
362.082	1994
362.083	1995
362.323	1996
362.324	1997
362.326	1998
362.564	1999
[truncated: 4,929 more rows]
