# Supplementary material for: A temperature- and stress-controlled failure criterion for ice-filledpermafrost rock joints
Source: Copernicus journal article supplement (doi:10.5194/tc-2018-57), 2018-03-28
Supplement: Supplementary file 1 [file tc-2018-57-supplement.zip › Suppl. material_Mamot et al/data_timeseries_acoustic_exp3b_WSK_spec3_Fig. S3.xlsx]

## Sheet: Sheet1
time_sec	hits_cumulative
3.96625	1
4.16742	2
5.57299	3
5.77397	4
5.97477	5
6.17578	6
6.37669	7
6.5775	8
6.77822	9
6.97929	10
7.18027	11
7.38127	12
7.38517	13
7.58229	14
7.78343	15
7.98437	16
8.18553	17
8.38653	18
8.58764	19
8.59146	20
8.78877	21
8.79253	22
8.99005	23
8.99376	24
9.19099	25
9.39205	26
9.59313	27
9.59686	28
9.79418	29
9.99516	30
9.99873	31
10.1963	32
10.3974	33
10.5984	34
10.7994	35
11.0004	36
11.004	37
11.2016	38
11.2052	39
11.4028	40
11.4064	41
11.6039	42
11.6075	43
11.8052	44
11.8086	45
12.0064	46
12.0099	47
12.2075	48
12.2109	49
12.4087	50
12.412	51
12.6099	52
12.6132	53
12.8111	54
12.8144	55
13.0118	56
13.0153	57
13.2133	58
13.2166	59
13.4142	60
13.4175	61
13.6149	62
13.6184	63
13.816	64
13.8193	65
14.0171	66
14.0203	67
14.2182	68
14.2213	69
14.4191	70
14.4223	71
14.6206	72
14.8218	73
15.0231	74
15.2254	75
15.4262	76
15.627	77
15.8279	78
16.0287	79
16.2313	80
16.4343	81
16.6394	82
16.8425	83
17.0448	84
17.2469	85
17.4491	86
17.6513	87
17.8536	88
18.0565	89
18.2611	90
18.469	91
221.113	92
221.791	93
222.243	94
222.469	95
222.92	96
224.049	97
224.952	98
225.404	99
225.63	100
225.856	101
226.082	102
226.308	103
226.534	104
226.76	105
227.212	106
227.437	107
227.664	108
227.89	109
228.343	110
228.569	111
228.796	112
229.022	113
229.248	114
229.474	115
229.7	116
229.927	117
230.153	118
230.379	119
230.605	120
230.832	121
231.058	122
231.284	123
231.51	124
231.736	125
231.963	126
232.189	127
232.415	128
232.642	129
232.868	130
233.094	131
233.32	132
233.547	133
233.773	134
234	135
234.226	136
234.453	137
234.679	138
234.905	139
235.132	140
235.358	141
235.585	142
235.812	143
236.039	144
236.265	145
236.491	146
236.718	147
236.944	148
237.171	149
237.398	150
237.625	151
237.851	152
238.078	153
238.305	154
238.532	155
238.759	156
238.986	157
239.212	158
239.438	159
239.665	160
239.891	161
240.118	162
240.344	163
240.571	164
240.798	165
241.025	166
241.252	167
241.479	168
241.705	169
241.932	170
242.159	171
242.386	172
242.613	173
242.84	174
243.068	175
243.295	176
243.522	177
243.75	178
243.977	179
244.203	180
244.431	181
244.658	182
244.885	183
245.112	184
245.339	185
245.567	186
245.793	187
246.02	188
246.247	189
246.475	190
246.702	191
246.929	192
247.156	193
247.383	194
247.611	195
247.838	196
248.066	197
248.294	198
248.522	199
248.75	200
248.977	201
249.205	202
249.432	203
249.66	204
249.887	205
250.115	206
250.342	207
250.57	208
250.798	209
251.025	210
251.253	211
251.481	212
251.709	213
251.937	214
252.164	215
252.392	216
252.62	217
252.847	218
253.075	219
253.303	220
253.531	221
253.758	222
253.985	223
254.213	224
254.441	225
254.669	226
254.897	227
255.125	228
255.352	229
255.58	230
255.808	231
256.036	232
256.263	233
256.49	234
256.717	235
256.945	236
257.173	237
257.401	238
257.629	239
257.856	240
258.084	241
258.312	242
258.539	243
258.767	244
258.994	245
259.222	246
259.45	247
259.677	248
259.905	249
260.133	250
260.361	251
260.588	252
260.815	253
261.043	254
261.27	255
261.498	256
261.726	257
261.953	258
262.181	259
262.408	260
262.636	261
262.864	262
263.092	263
263.319	264
263.546	265
263.774	266
264.002	267
264.229	268
264.457	269
264.685	270
265.14	271
265.368	272
265.596	273
265.824	274
266.052	275
266.28	276
266.508	277
266.736	278
266.964	279
267.192	280
267.42	281
267.649	282
267.877	283
268.105	284
268.333	285
268.561	286
268.789	287
269.017	288
269.245	289
269.473	290
269.701	291
269.929	292
270.157	293
270.385	294
270.613	295
270.841	296
271.07	297
271.298	298
271.526	299
271.755	300
271.983	301
272.212	302
272.44	303
272.669	304
272.897	305
273.126	306
273.354	307
273.583	308
273.812	309
274.04	310
274.268	311
274.497	312
274.726	313
274.954	314
275.183	315
275.412	316
275.64	317
275.869	318
276.097	319
276.326	320
276.555	321
276.784	322
277.012	323
277.241	324
277.469	325
277.697	326
277.925	327
278.154	328
278.383	329
278.611	330
278.84	331
279.068	332
279.297	333
279.525	334
279.753	335
279.982	336
280.211	337
280.439	338
280.668	339
280.896	340
281.125	341
281.353	342
281.582	343
281.811	344
282.04	345
282.269	346
282.497	347
282.726	348
282.955	349
283.183	350
283.411	351
283.64	352
283.869	353
284.098	354
284.326	355
284.555	356
284.784	357
285.013	358
285.242	359
285.471	360
285.7	361
285.928	362
286.157	363
286.387	364
286.615	365
286.844	366
287.073	367
287.302	368
287.531	369
287.76	370
287.989	371
288.218	372
288.447	373
288.676	374
288.905	375
289.134	376
289.363	377
289.592	378
289.821	379
290.05	380
290.28	381
290.509	382
290.738	383
290.967	384
291.196	385
291.425	386
291.654	387
291.883	388
292.113	389
292.342	390
292.571	391
292.801	392
293.03	393
293.259	394
293.488	395
293.717	396
293.947	397
294.176	398
294.405	399
294.634	400
294.863	401
295.093	402
295.322	403
295.551	404
295.78	405
296.008	406
296.237	407
296.466	408
296.696	409
296.925	410
297.154	411
297.383	412
297.611	413
297.84	414
298.069	415
298.298	416
298.527	417
298.757	418
298.986	419
299.215	420
299.443	421
299.671	422
299.9	423
300.129	424
300.358	425
300.586	426
300.815	427
301.043	428
301.272	429
301.5	430
301.729	431
301.958	432
302.186	433
302.415	434
302.643	435
302.872	436
303.1	437
303.329	438
303.557	439
303.786	440
304.014	441
304.243	442
304.471	443
304.7	444
304.928	445
305.157	446
305.385	447
305.614	448
305.842	449
306.071	450
306.299	451
306.528	452
306.756	453
306.985	454
307.213	455
307.441	456
307.67	457
307.899	458
308.127	459
308.356	460
308.584	461
308.813	462
309.042	463
309.27	464
309.499	465
309.728	466
309.956	467
310.185	468
310.414	469
310.642	470
310.871	471
311.1	472
311.328	473
311.557	474
311.786	475
312.014	476
312.243	477
312.472	478
312.7	479
312.929	480
313.158	481
313.386	482
313.615	483
313.844	484
314.072	485
314.301	486
314.53	487
314.759	488
314.988	489
315.217	490
315.446	491
315.675	492
315.904	493
316.133	494
316.361	495
316.59	496
316.819	497
317.048	498
317.277	499
317.506	500
317.735	501
317.964	502
318.194	503
318.423	504
318.652	505
318.881	506
319.11	507
319.339	508
319.568	509
319.797	510
320.026	511
320.255	512
320.484	513
320.713	514
320.942	515
321.171	516
321.4	517
321.629	518
321.858	519
322.087	520
322.316	521
322.545	522
322.774	523
323.004	524
323.233	525
323.462	526
323.692	527
323.921	528
324.151	529
324.38	530
324.609	531
324.838	532
325.067	533
325.297	534
325.526	535
325.755	536
325.984	537
326.213	538
326.443	539
326.672	540
326.901	541
327.131	542
327.36	543
327.589	544
327.818	545
328.047	546
328.277	547
328.506	548
328.736	549
328.965	550
329.195	551
329.424	552
329.653	553
329.882	554
330.111	555
330.34	556
330.57	557
330.799	558
331.029	559
331.258	560
331.487	561
331.716	562
331.946	563
332.175	564
332.404	565
332.634	566
332.863	567
333.092	568
333.321	569
333.55	570
333.779	571
334.009	572
334.238	573
334.467	574
334.697	575
334.926	576
335.155	577
335.385	578
335.614	579
335.843	580
336.072	581
336.302	582
336.531	583
336.76	584
336.989	585
337.218	586
337.448	587
337.677	588
337.907	589
338.136	590
338.366	591
338.596	592
338.825	593
339.054	594
339.284	595
339.513	596
339.743	597
339.972	598
340.202	599
340.432	600
340.661	601
340.891	602
341.12	603
341.35	604
341.579	605
341.809	606
342.039	607
342.269	608
342.499	609
342.729	610
342.959	611
343.189	612
343.419	613
343.648	614
343.878	615
344.108	616
344.338	617
344.568	618
344.798	619
345.028	620
345.258	621
345.488	622
345.718	623
345.947	624
346.177	625
346.407	626
346.637	627
346.867	628
347.096	629
347.326	630
347.556	631
347.786	632
348.016	633
348.245	634
348.475	635
348.705	636
348.935	637
349.166	638
349.395	639
349.626	640
349.856	641
350.086	642
350.316	643
350.546	644
350.776	645
351.006	646
351.236	647
351.466	648
351.696	649
351.926	650
352.157	651
352.387	652
352.617	653
352.847	654
353.078	655
353.307	656
353.537	657
353.767	658
353.996	659
354.225	660
354.455	661
354.685	662
354.914	663
355.145	664
355.375	665
355.605	666
355.834	667
356.064	668
356.295	669
356.525	670
356.755	671
356.985	672
357.215	673
357.445	674
357.675	675
357.904	676
358.134	677
358.363	678
358.593	679
358.823	680
359.053	681
359.283	682
359.513	683
359.744	684
359.974	685
360.204	686
360.434	687
360.663	688
360.893	689
361.124	690
361.353	691
361.581	692
361.581	693
361.808	694
362.032	695
362.27	696
362.49	697
403.69	698
411.869	699
411.87	700
412.015	701
412.098	702
412.099	703
412.244	704
412.327	705
412.328	706
412.473	707
412.556	708
412.557	709
412.785	710
412.786	711
412.793	712
412.93	713
413.015	714
413.016	715
413.022	716
413.159	717
413.16	718
413.244	719
413.245	720
413.25	721
413.388	722
413.389	723
413.473	724
413.474	725
413.48	726
413.481	727
413.617	728
413.618	729
413.702	730
413.703	731
413.709	732
413.71	733
413.846	734
413.847	735
413.931	736
413.932	737
413.937	738
413.938	739
414.075	740
414.076	741
414.16	742
414.161	743
414.167	744
414.168	745
414.304	746
414.305	747
414.389	748
414.39	749
414.396	750
414.397	751
414.533	752
414.534	753
414.619	754
414.62	755
414.626	756
414.627	757
414.764	758
414.765	759
414.849	760
414.85	761
414.995	762
415.079	763
415.08	764
415.308	765
415.309	766
415.537	767
415.538	768
415.766	769
415.767	770
415.995	771
415.996	772
418.41	773
418.411	774
470.256	775
470.257	776
651.133	777
651.368	778
651.601	779
651.836	780
652.305	781
652.539	782
672.271	783
672.272	784
672.503	785
672.504	786
672.735	787
672.736	788
672.968	789
672.969	790
673.2	791
673.201	792
673.433	793
673.434	794
673.666	795
690.767	796
690.768	797
753.474	798
753.709	799
760.297	800
761.001	801
761.002	802
761.235	803
761.469	804
761.47	805
761.703	806
762.171	807
762.639	808
762.872	809
763.105	810
764.038	811
764.738	812
765.203	813
765.204	814
765.436	815
765.437	816
765.669	817
765.67	818
765.902	819
765.903	820
766.134	821
766.135	822
766.367	823
766.368	824
766.6	825
766.834	826
766.835	827
767.067	828
767.068	829
767.3	830
767.532	831
767.533	832
767.766	833
767.767	834
767.999	835
768.232	836
768.233	837
768.464	838
768.465	839
768.697	840
768.698	841
768.929	842
768.93	843
769.161	844
769.162	845
769.394	846
769.626	847
770.091	848
770.092	849
770.323	850
770.324	851
770.556	852
770.557	853
770.788	854
770.789	855
771.021	856
771.254	857
771.255	858
771.486	859
771.718	860
771.95	861
771.951	862
772.183	863
772.416	864
772.417	865
772.648	866
772.649	867
772.881	868
772.882	869
773.113	870
773.114	871
773.346	872
773.347	873
773.578	874
773.579	875
773.81	876
773.811	877
774.042	878
774.043	879
774.275	880
774.276	881
774.508	882
774.509	883
774.741	884
774.741	885
774.973	886
774.974	887
775.206	888
775.207	889
775.439	890
775.44	891
775.671	892
775.672	893
775.904	894
775.905	895
776.137	896
776.138	897
776.37	898
776.371	899
776.603	900
776.604	901
776.835	902
776.836	903
777.068	904
777.069	905
777.3	906
777.301	907
777.533	908
777.534	909
777.765	910
777.998	911
777.999	912
778.231	913
778.231	914
778.463	915
778.464	916
778.696	917
778.697	918
778.928	919
778.929	920
779.16	921
779.161	922
779.393	923
779.394	924
779.626	925
779.627	926
779.858	927
780.091	928
780.091	929
780.323	930
780.323	931
780.555	932
780.556	933
780.787	934
780.788	935
781.019	936
781.251	937
781.252	938
781.483	939
781.484	940
781.715	941
781.716	942
781.948	943
781.949	944
782.18	945
782.181	946
782.413	947
782.414	948
782.645	949
782.646	950
782.877	951
782.878	952
783.109	953
783.11	954
783.341	955
783.342	956
783.573	957
783.575	958
783.807	959
784.038	960
784.039	961
784.27	962
784.271	963
784.502	964
784.503	965
784.735	966
784.736	967
784.967	968
785.199	969
785.199	970
785.432	971
785.664	972
785.896	973
785.897	974
786.129	975
786.13	976
786.361	977
786.593	978
786.825	979
787.058	980
787.058	981
787.29	982
787.291	983
787.523	984
787.755	985
787.987	986
788.219	987
788.219	988
788.451	989
788.683	990
788.916	991
788.917	992
789.148	993
789.381	994
789.613	995
789.845	996
790.077	997
790.31	998
790.311	999
790.353	1000
790.354	1001
790.542	1002
790.574	1003
790.575	1004
790.775	1005
790.803	1006
790.804	1007
791.007	1008
791.035	1009
791.036	1010
791.239	1011
791.266	1012
791.267	1013
791.472	1014
791.498	1015
791.499	1016
791.704	1017
791.705	1018
791.729	1019
791.73	1020
791.936	1021
791.961	1022
791.962	1023
792.169	1024
792.176	1025
792.401	1026
792.407	1027
792.408	1028
792.633	1029
792.634	1030
792.639	1031
792.639	1032
792.865	1033
792.87	1034
792.871	1035
793.098	1036
793.103	1037
793.103	1038
793.331	1039
793.335	1040
793.336	1041
793.562	1042
793.567	1043
793.568	1044
793.794	1045
793.798	1046
793.799	1047
794.03	1048
794.031	1049
794.262	1050
794.263	1051
794.495	1052
794.495	1053
794.727	1054
794.728	1055
794.956	1056
794.959	1057
794.96	1058
795.191	1059
795.192	1060
795.423	1061
795.424	1062
795.652	1063
795.655	1064
795.656	1065
795.887	1066
795.888	1067
796.119	1068
796.12	1069
796.352	1070
796.353	1071
796.584	1072
796.585	1073
796.816	1074
796.817	1075
797.048	1076
797.049	1077
797.28	1078
797.281	1079
797.512	1080
797.514	1081
797.745	1082
797.746	1083
797.977	1084
797.978	1085
798.209	1086
798.21	1087
798.441	1088
798.443	1089
798.673	1090
798.674	1091
798.905	1092
798.906	1093
799.137	1094
799.137	1095
799.369	1096
799.37	1097
799.601	1098
799.602	1099
799.833	1100
799.834	1101
800.066	1102
800.066	1103
800.298	1104
800.299	1105
800.53	1106
800.531	1107
800.762	1108
800.763	1109
800.995	1110
800.996	1111
801.227	1112
801.228	1113
801.46	1114
801.461	1115
801.692	1116
801.693	1117
801.924	1118
801.925	1119
802.156	1120
802.157	1121
802.389	1122
802.39	1123
802.621	1124
802.622	1125
802.853	1126
802.854	1127
803.086	1128
803.087	1129
803.318	1130
804.763	1131
804.764	1132
805.49	1133
840.637	1134
840.871	1135
840.872	1136
841.105	1137
842.039	1138
851.39	1139
851.39	1140
858.932	1141
858.932	1142
859.165	1143
859.166	1144
859.399	1145
859.4	1146
859.406	1147
859.407	1148
859.637	1149
859.638	1150
859.869	1151
859.87	1152
859.962	1153
859.962	1154
860.102	1155
860.102	1156
860.335	1157
860.336	1158
860.568	1159
860.569	1160
860.802	1161
860.803	1162
861.016	1163
861.016	1164
861.035	1165
861.036	1166
861.248	1167
861.249	1168
861.269	1169
861.269	1170
861.481	1171
861.482	1172
861.501	1173
861.502	1174
861.715	1175
861.715	1176
861.948	1177
861.948	1178
862.181	1179
862.182	1180
862.415	1181
862.416	1182
862.648	1183
862.649	1184
862.881	1185
862.882	1186
863.115	1187
863.116	1188
863.349	1189
863.349	1190
863.582	1191
863.583	1192
863.816	1193
863.816	1194
864.049	1195
864.05	1196
864.209	1197
864.283	1198
864.283	1199
864.517	1200
864.75	1201
864.983	1202
865.218	1203
865.452	1204
867.719	1205
867.953	1206
868.421	1207
868.655	1208
868.89	1209
870.295	1210
870.764	1211
870.998	1212
871.232	1213
871.466	1214
902.956	1215
903.191	1216
981.978	1217
981.978	1218
982.618	1219
982.9	1220
982.901	1221
984.679	1222
984.679	1223
988.37	1224
988.371	1225
1012.21	1226
1012.21	1227
1014.3	1228
1014.3	1229
1015.73	1230
1015.73	1231
1022.46	1232
1022.47	1233
1023.72	1234
1023.72	1235
1025.68	1236
1025.68	1237
1026.72	1238
1026.72	1239
1030.47	1240
1030.47	1241
1030.75	1242
1030.76	1243
1031.33	1244
1031.33	1245
1031.99	1246
1036.67	1247
1036.67	1248
1039.09	1249
1039.09	1250
1040.29	1251
1040.29	1252
1040.55	1253
1040.55	1254
1040.87	1255
1040.87	1256
1041.44	1257
1041.44	1258
1041.96	1259
1041.96	1260
1043.32	1261
1043.99	1262
1043.99	1263
1045.18	1264
1045.18	1265
1045.22	1266
1045.22	1267
1045.34	1268
1045.34	1269
1045.42	1270
1045.42	1271
1052.68	1272
1052.68	1273
1054.35	1274
1054.35	1275
1054.88	1276
1054.88	1277
1055.54	1278
1055.54	1279
1056.18	1280
1056.19	1281
1057.43	1282
1057.43	1283
1058.33	1284
1058.33	1285
1058.47	1286
1058.47	1287
1058.87	1288
1059.05	1289
1059.05	1290
1059.37	1291
1059.37	1292
1059.65	1293
1059.65	1294
1059.7	1295
1059.7	1296
1059.93	1297
1059.93	1298
1061.09	1299
1061.09	1300
1062.2	1301
1062.2	1302
1062.41	1303
1062.41	1304
1063.54	1305
1063.54	1306
1066.36	1307
1066.36	1308
1067.53	1309
1067.53	1310
1067.83	1311
1067.83	1312
1068.27	1313
1068.27	1314
1069.3	1315
1069.3	1316
1069.83	1317
1069.83	1318
1070.17	1319
1070.32	1320
1070.32	1321
1070.81	1322
1070.81	1323
1071.13	1324
1071.13	1325
1071.49	1326
1071.49	1327
1071.79	1328
1071.79	1329
1072.01	1330
1072.01	1331
1072.05	1332
1072.05	1333
1072.2	1334
1072.2	1335
1072.86	1336
1072.86	1337
1072.87	1338
1072.87	1339
1073.13	1340
1073.14	1341
1074.73	1342
1074.73	1343
1074.95	1344
1074.95	1345
1075.54	1346
1075.54	1347
1075.77	1348
1075.77	1349
1075.8	1350
1075.8	1351
1076.04	1352
1076.04	1353
1076.18	1354
1076.18	1355
1076.37	1356
1076.37	1357
1076.61	1358
1076.61	1359
1076.63	1360
1076.63	1361
1076.71	1362
1076.71	1363
1077.19	1364
1077.19	1365
1077.46	1366
1077.46	1367
1077.61	1368
1077.61	1369
1078.41	1370
1078.41	1371
1079.03	1372
1079.03	1373
1079.18	1374
1079.18	1375
1079.61	1376
1079.62	1377
1080.47	1378
1080.47	1379
1080.54	1380
1080.54	1381
1080.63	1382
1080.63	1383
1080.86	1384
1080.86	1385
1081.17	1386
1081.17	1387
1081.21	1388
1081.21	1389
1081.32	1390
1081.32	1391
1081.58	1392
1081.58	1393
1081.6	1394
1081.6	1395
1081.63	1396
1081.63	1397
1081.66	1398
1081.67	1399
1081.67	1400
1081.86	1401
1081.86	1402
1081.92	1403
1081.98	1404
1081.99	1405
1082.04	1406
1082.04	1407
1082.15	1408
1082.15	1409
1082.31	1410
1082.31	1411
1082.53	1412
1082.53	1413
1082.63	1414
1082.63	1415
1082.68	1416
1082.68	1417
1082.68	1418
1082.68	1419
1082.88	1420
1082.88	1421
1083.2	1422
1083.21	1423
1083.51	1424
1083.52	1425
1083.73	1426
1083.73	1427
1083.74	1428
1083.74	1429
1083.78	1430
1083.78	1431
1083.79	1432
1083.8	1433
1083.87	1434
1083.87	1435
1083.95	1436
1083.95	1437
1083.99	1438
1083.99	1439
1084.08	1440
1084.08	1441
1084.17	1442
1084.17	1443
1084.21	1444
1084.21	1445
1084.25	1446
1084.29	1447
1084.29	1448
1084.33	1449
1084.33	1450
1084.36	1451
1084.36	1452
1084.38	1453
1084.41	1454
1084.61	1455
1084.61	1456
1084.62	1457
1084.62	1458
1084.74	1459
1084.74	1460
1084.77	1461
1084.78	1462
1084.79	1463
1084.83	1464
1084.84	1465
1084.84	1466
1084.93	1467
1084.93	1468
1084.95	1469
1084.95	1470
1085.2	1471
1085.2	1472
1085.44	1473
1085.44	1474
1085.45	1475
1085.45	1476
1085.52	1477
1085.52	1478
1085.52	1479
1085.53	1480
1085.58	1481
1085.58	1482
1085.89	1483
1085.89	1484
1085.92	1485
1085.92	1486
1086.13	1487
1086.13	1488
1086.26	1489
1086.26	1490
1086.3	1491
1086.3	1492
1086.31	1493
1086.47	1494
1086.48	1495
1086.51	1496
1086.51	1497
1086.53	1498
1086.66	1499
1086.66	1500
1086.69	1501
1086.69	1502
1086.69	1503
1086.71	1504
1086.72	1505
1086.74	1506
1086.74	1507
1086.79	1508
1086.79	1509
1086.91	1510
1086.91	1511
1086.94	1512
1086.94	1513
1087.13	1514
1087.13	1515
1087.23	1516
1087.23	1517
1087.24	1518
1087.25	1519
1087.39	1520
1087.4	1521
1087.41	1522
1087.41	1523
1087.64	1524
1087.64	1525
1087.72	1526
1087.72	1527
1088.04	1528
1088.05	1529
1088.16	1530
1088.17	1531
1088.18	1532
1088.18	1533
1088.27	1534
1088.27	1535
1088.39	1536
1088.39	1537
1088.41	1538
1088.42	1539
1088.46	1540
1088.46	1541
1088.49	1542
1088.5	1543
1088.51	1544
1088.52	1545
1088.55	1546
1088.55	1547
1088.58	1548
1088.58	1549
1088.6	1550
1088.6	1551
1088.62	1552
1088.66	1553
1088.66	1554
1088.95	1555
1088.98	1556
1088.98	1557
1089.28	1558
1089.28	1559
1089.33	1560
1089.33	1561
1089.34	1562
1089.34	1563
1089.39	1564
1089.39	1565
1089.55	1566
1089.55	1567
1089.56	1568
1089.57	1569
1089.65	1570
1089.65	1571
1089.66	1572
1089.66	1573
1089.75	1574
1089.75	1575
1090.02	1576
1090.14	1577
1090.14	1578
1090.22	1579
1090.22	1580
1090.3	1581
1090.3	1582
1090.31	1583
1090.31	1584
1090.35	1585
1090.36	1586
1090.41	1587
1090.41	1588
1090.55	1589
1090.55	1590
1090.56	1591
1090.77	1592
1090.77	1593
1091.01	1594
1091.01	1595
1091.14	1596
1091.14	1597
1091.37	1598
1091.37	1599
1091.75	1600
1091.75	1601
1091.8	1602
1091.8	1603
1091.91	1604
1091.91	1605
1091.94	1606
1091.94	1607
1092.2	1608
1092.2	1609
1092.23	1610
1092.23	1611
1092.46	1612
1092.46	1613
1092.63	1614
1092.65	1615
1092.79	1616
1092.84	1617
1092.84	1618
1092.88	1619
1092.88	1620
1092.9	1621
1092.9	1622
1092.96	1623
1092.96	1624
1093.04	1625
1093.04	1626
1093.05	1627
1093.05	1628
1093.11	1629
1093.11	1630
1093.16	1631
1093.16	1632
1093.33	1633
1093.33	1634
1093.35	1635
1093.39	1636
1093.39	1637
1093.46	1638
1093.46	1639
1093.49	1640
1093.49	1641
1093.51	1642
1093.51	1643
1093.52	1644
1093.57	1645
1093.58	1646
1093.63	1647
1093.63	1648
1093.71	1649
1093.71	1650
1093.72	1651
1093.83	1652
1093.83	1653
1093.87	1654
1094.03	1655
1094.03	1656
1094.26	1657
1094.26	1658
1094.28	1659
1094.28	1660
1094.29	1661
1094.3	1662
1094.3	1663
1094.31	1664
1094.56	1665
1094.56	1666
1094.63	1667
1094.63	1668
1094.81	1669
1094.81	1670
1094.9	1671
1094.92	1672
1094.92	1673
1095.16	1674
1095.16	1675
1095.2	1676
1095.21	1677
1095.21	1678
1095.25	1679
1095.25	1680
1095.27	1681
1095.27	1682
1095.53	1683
1095.53	1684
1095.73	1685
1095.73	1686
1095.75	1687
1095.75	1688
1095.83	1689
1095.83	1690
1095.85	1691
1095.85	1692
1095.88	1693
1095.88	1694
1096.04	1695
1096.04	1696
1096.05	1697
1096.05	1698
1096.16	1699
1096.16	1700
1096.22	1701
1096.22	1702
1096.25	1703
1096.25	1704
1096.3	1705
1096.3	1706
1096.38	1707
1096.38	1708
1096.73	1709
1096.73	1710
1096.8	1711
1096.8	1712
1096.81	1713
1096.95	1714
1096.95	1715
1097.01	1716
1097.01	1717
1097.05	1718
1097.05	1719
1097.1	1720
1097.1	1721
1097.13	1722
1097.13	1723
1097.4	1724
1097.4	1725
1097.4	1726
1097.4	1727
1097.57	1728
1097.57	1729
1097.67	1730
1097.67	1731
1097.79	1732
1097.96	1733
1097.96	1734
1098.51	1735
1098.51	1736
1098.66	1737
1098.7	1738
1098.7	1739
1098.89	1740
1098.89	1741
1099.07	1742
1099.07	1743
1099.18	1744
1099.18	1745
1099.27	1746
1099.27	1747
1099.51	1748
1099.52	1749
1099.58	1750
1099.66	1751
1099.71	1752
1099.71	1753
1099.79	1754
1099.79	1755
1099.86	1756
1099.86	1757
1099.93	1758
1099.93	1759
1100	1760
1100	1761
1100.01	1762
1100.01	1763
1100.09	1764
1100.09	1765
1100.25	1766
1100.25	1767
1100.6	1768
1100.6	1769
1100.88	1770
1100.88	1771
1101.06	1772
1101.07	1773
1101.14	1774
1101.15	1775
1101.31	1776
1101.31	1777
1101.44	1778
1101.49	1779
1101.5	1780
1101.79	1781
1101.79	1782
1101.92	1783
1101.92	1784
1102.12	1785
1102.12	1786
1102.17	1787
1102.17	1788
1102.5	1789
1102.5	1790
1102.53	1791
1102.53	1792
1102.76	1793
1102.77	1794
1102.84	1795
1102.84	1796
1102.88	1797
1102.88	1798
1103.05	1799
1103.05	1800
1103.38	1801
1103.43	1802
1103.43	1803
1103.44	1804
1103.44	1805
1103.48	1806
1103.48	1807
1103.74	1808
1103.74	1809
1103.86	1810
1103.86	1811
1103.91	1812
1103.91	1813
1104.02	1814
1104.02	1815
1104.12	1816
1104.12	1817
1104.28	1818
1104.28	1819
1104.34	1820
1104.34	1821
1104.39	1822
1104.39	1823
1104.54	1824
1104.62	1825
1104.62	1826
1104.63	1827
1104.64	1828
1104.67	1829
1104.67	1830
1104.74	1831
1104.74	1832
1104.8	1833
1104.81	1834
1104.82	1835
1104.82	1836
1104.84	1837
1104.84	1838
1104.91	1839
1104.91	1840
1105.13	1841
1105.13	1842
1105.15	1843
1105.15	1844
1105.19	1845
1105.25	1846
1105.25	1847
1105.42	1848
1105.42	1849
1105.6	1850
1105.61	1851
1105.69	1852
1105.69	1853
1105.88	1854
1105.88	1855
1105.98	1856
1105.98	1857
1106.02	1858
1106.02	1859
1106.09	1860
1106.09	1861
1106.5	1862
1106.5	1863
1106.52	1864
1106.52	1865
1106.63	1866
1106.63	1867
1106.66	1868
1106.83	1869
1106.83	1870
1106.86	1871
1106.86	1872
1107.3	1873
1107.33	1874
1107.33	1875
1107.44	1876
1107.51	1877
1107.51	1878
1107.59	1879
1107.59	1880
1107.67	1881
1107.67	1882
1107.69	1883
1107.7	1884
1107.71	1885
1107.94	1886
1107.94	1887
1107.96	1888
1107.96	1889
1108.04	1890
1108.04	1891
1108.06	1892
1108.06	1893
1108.1	1894
1108.1	1895
1108.16	1896
1108.16	1897
1108.3	1898
1108.3	1899
1108.37	1900
1108.46	1901
1108.46	1902
1108.71	1903
1108.74	1904
1108.74	1905
1108.91	1906
1108.91	1907
1108.91	1908
1108.91	1909
1108.99	1910
1108.99	1911
1109.36	1912
1109.36	1913
1109.46	1914
1109.46	1915
1109.59	1916
1109.59	1917
1109.63	1918
1109.63	1919
1109.74	1920
1109.74	1921
1109.78	1922
1109.78	1923
1109.85	1924
1109.85	1925
1109.89	1926
1109.89	1927
1109.96	1928
1109.96	1929
1110.05	1930
1110.05	1931
1110.07	1932
1110.07	1933
1110.17	1934
1110.37	1935
1110.37	1936
1110.5	1937
1110.5	1938
1110.59	1939
1110.77	1940
1110.77	1941
1110.83	1942
1110.84	1943
1110.84	1944
1110.95	1945
1110.95	1946
1111.04	1947
1111.04	1948
1111.15	1949
1111.15	1950
1111.28	1951
1111.46	1952
1111.47	1953
1111.59	1954
1111.59	1955
1111.75	1956
1111.75	1957
1111.82	1958
1111.82	1959
1111.83	1960
1111.93	1961
1111.93	1962
1111.94	1963
1111.94	1964
1111.97	1965
1111.97	1966
1112.08	1967
1112.1	1968
1112.1	1969
1112.16	1970
1112.16	1971
1112.24	1972
1112.24	1973
1112.26	1974
1112.26	1975
1112.31	1976
1112.31	1977
1112.32	1978
1112.45	1979
1112.46	1980
1112.46	1981
1112.54	1982
1112.54	1983
1112.63	1984
1112.68	1985
1112.68	1986
1112.7	1987
1112.7	1988
1112.71	1989
1112.71	1990
1112.73	1991
1112.73	1992
1112.78	1993
1112.78	1994
1112.88	1995
1112.99	1996
1113.02	1997
1113.02	1998
1113.14	1999
[truncated: 6,016 more rows]
