# Supplementary material for: A temperature- and stress-controlled failure criterion for ice-filledpermafrost rock joints
Source: Copernicus journal article supplement (doi:10.5194/tc-2018-57), 2018-03-28
Supplement: Supplementary file 1 [file tc-2018-57-supplement.zip › Suppl. material_Mamot et al/data_timeseries_acoustic_exp5b_WSK_spec2_Fig. S3.xlsx]

## Sheet: Sheet1
time_sec	hits_cumulative
82.7075	1
82.9504	2
83.191	3
83.4334	4
83.676	5
83.9186	6
84.1605	7
84.4024	8
84.6453	9
86.8102	10
87.535	11
88.0138	12
88.0206	13
88.2608	14
88.4967	15
88.5035	16
88.9851	17
89.2211	18
89.2259	19
89.2274	20
89.4676	21
89.7102	22
89.9451	23
90.1915	24
90.4331	25
90.674	26
91.1567	27
91.3977	28
91.6392	29
91.8803	30
92.121	31
92.3609	32
92.6019	33
92.8425	34
93.0828	35
93.3242	36
93.5657	37
93.8062	38
94.0458	39
94.2876	40
94.5277	41
95.0094	42
95.2496	43
95.4906	44
95.7308	45
95.9717	46
96.2119	47
96.215	48
96.4527	49
96.4537	50
96.4559	51
96.6907	52
96.6924	53
96.9323	54
96.9337	55
97.1728	56
97.1742	57
97.4128	58
97.4145	59
97.6539	60
97.655	61
97.6591	62
97.8932	63
97.8948	64
97.8962	65
98.1355	66
98.1374	67
98.139	68
98.3757	69
98.376	70
98.3795	71
98.6164	72
98.6168	73
98.6207	74
98.8553	75
98.8568	76
99.0968	77
99.0977	78
99.3356	79
99.3371	80
99.5778	81
99.5794	82
99.8158	83
99.8173	84
100.057	85
100.058	86
100.297	87
100.298	88
100.537	89
100.541	90
100.773	91
100.777	92
100.778	93
100.799	94
101.018	95
101.02	96
101.258	97
101.259	98
101.495	99
101.498	100
101.499	101
101.501	102
101.74	103
101.741	104
101.978	105
101.979	106
101.981	107
102.218	108
102.22	109
102.454	110
102.458	111
102.46	112
102.7	113
102.701	114
102.703	115
102.705	116
102.941	117
102.942	118
103.181	119
103.183	120
103.422	121
103.423	122
103.658	123
103.661	124
103.662	125
103.664	126
103.901	127
103.903	128
104.142	129
104.144	130
104.378	131
104.382	132
104.384	133
104.623	134
104.625	135
104.864	136
104.865	137
105.1	138
105.101	139
105.104	140
105.105	141
105.343	142
105.344	143
105.346	144
105.585	145
105.586	146
105.821	147
105.823	148
105.826	149
105.827	150
106.061	151
106.063	152
106.065	153
106.067	154
106.304	155
106.306	156
106.308	157
106.545	158
106.546	159
106.548	160
106.784	161
106.786	162
106.788	163
107.027	164
107.028	165
107.268	166
107.269	167
107.505	168
107.508	169
107.509	170
107.745	171
107.747	172
107.749	173
107.984	174
107.985	175
107.987	176
107.989	177
108.226	178
108.229	179
108.23	180
108.464	181
108.466	182
108.468	183
108.469	184
108.709	185
108.71	186
108.945	187
108.949	188
108.95	189
109.189	190
109.191	191
109.429	192
109.431	193
109.669	194
109.67	195
109.672	196
109.908	197
109.91	198
109.912	199
110.151	200
110.153	201
110.388	202
110.389	203
110.392	204
110.393	205
110.63	206
110.632	207
110.634	208
110.868	209
110.87	210
110.872	211
110.874	212
111.112	213
111.113	214
111.35	215
111.353	216
111.354	217
111.591	218
111.593	219
111.594	220
111.829	221
111.831	222
111.833	223
111.834	224
112.069	225
112.074	226
112.074	227
112.309	228
112.313	229
112.314	230
112.549	231
112.553	232
112.554	233
112.793	234
112.795	235
113.029	236
113.031	237
113.034	238
113.034	239
113.274	240
113.274	241
113.514	242
113.515	243
113.753	244
113.755	245
113.992	246
113.994	247
113.995	248
114.231	249
114.234	250
114.235	251
114.47	252
114.471	253
114.474	254
114.475	255
114.712	256
114.715	257
114.715	258
114.95	259
114.951	260
114.954	261
114.955	262
115.192	263
115.194	264
115.196	265
115.197	266
115.43	267
115.434	268
115.435	269
115.672	270
115.674	271
115.675	272
115.91	273
115.912	274
115.914	275
115.915	276
116.152	277
116.154	278
116.155	279
116.39	280
116.392	281
116.394	282
116.396	283
116.632	284
116.635	285
116.874	286
116.876	287
117.112	288
117.113	289
117.116	290
117.116	291
117.354	292
117.354	293
117.358	294
117.591	295
117.593	296
117.595	297
117.596	298
117.832	299
117.832	300
117.835	301
117.835	302
118.069	303
118.071	304
118.073	305
118.074	306
118.309	307
118.31	308
118.313	309
118.313	310
118.55	311
118.552	312
118.553	313
118.789	314
118.792	315
118.793	316
118.795	317
119.029	318
119.03	319
119.033	320
119.034	321
119.271	322
119.273	323
119.274	324
119.508	325
119.51	326
119.512	327
119.514	328
119.748	329
119.75	330
119.753	331
119.988	332
119.989	333
119.991	334
119.993	335
120.227	336
120.229	337
120.231	338
120.232	339
120.467	340
120.469	341
120.472	342
120.709	343
120.712	344
120.712	345
120.95	346
120.954	347
120.955	348
121.188	349
121.19	350
121.195	351
121.429	352
121.431	353
121.433	354
121.434	355
121.693	356
121.694	357
121.696	358
121.698	359
121.971	360
121.973	361
121.974	362
121.976	363
122.221	364
122.223	365
122.226	366
122.227	367
122.472	368
122.473	369
122.71	370
122.711	371
122.714	372
122.715	373
122.953	374
122.955	375
122.957	376
122.959	377
123.196	378
123.2	379
123.201	380
123.204	381
123.441	382
123.443	383
123.444	384
123.684	385
123.687	386
123.687	387
123.926	388
123.929	389
123.929	390
124.171	391
124.173	392
124.176	393
124.412	394
124.415	395
124.415	396
124.658	397
124.659	398
124.897	399
124.898	400
124.901	401
124.902	402
125.142	403
125.144	404
125.145	405
125.384	406
125.387	407
125.387	408
125.626	409
125.63	410
125.632	411
125.872	412
125.875	413
126.118	414
126.118	415
126.121	416
126.358	417
126.361	418
126.362	419
126.604	420
126.606	421
126.849	422
126.849	423
127.092	424
127.092	425
127.096	426
127.336	427
127.336	428
127.574	429
127.579	430
127.579	431
127.587	432
127.823	433
127.823	434
127.826	435
128.066	436
128.066	437
128.305	438
128.308	439
128.31	440
128.311	441
128.551	442
128.554	443
128.555	444
128.793	445
128.794	446
128.797	447
128.798	448
129.036	449
129.041	450
129.043	451
129.28	452
129.282	453
129.285	454
129.286	455
129.524	456
129.528	457
129.529	458
129.768	459
129.77	460
129.772	461
129.773	462
130.011	463
130.013	464
130.015	465
130.016	466
130.255	467
130.255	468
130.26	469
130.499	470
130.5	471
130.503	472
130.505	473
130.742	474
130.744	475
130.747	476
130.748	477
130.986	478
130.988	479
130.99	480
130.991	481
131.229	482
131.231	483
131.234	484
131.235	485
131.473	486
131.475	487
131.478	488
131.479	489
131.719	490
131.723	491
131.961	492
131.962	493
131.965	494
131.967	495
132.205	496
132.206	497
132.209	498
132.21	499
132.45	500
132.453	501
132.455	502
132.694	503
132.695	504
132.698	505
132.938	506
132.941	507
132.942	508
133.181	509
133.184	510
133.185	511
133.425	512
133.428	513
133.429	514
133.671	515
133.671	516
133.91	517
133.912	518
133.915	519
133.916	520
134.155	521
134.159	522
134.397	523
134.398	524
134.401	525
134.402	526
134.642	527
134.645	528
134.646	529
134.885	530
134.89	531
135.129	532
135.132	533
135.133	534
135.371	535
135.372	536
135.375	537
135.376	538
135.616	539
135.619	540
135.62	541
135.858	542
135.86	543
135.862	544
135.865	545
136.107	546
136.345	547
136.347	548
136.35	549
136.35	550
136.588	551
136.59	552
136.592	553
136.594	554
136.83	555
136.832	556
136.834	557
136.835	558
137.072	559
137.074	560
137.076	561
137.078	562
137.315	563
137.316	564
137.319	565
137.321	566
137.558	567
137.559	568
137.562	569
137.563	570
137.801	571
137.801	572
137.805	573
137.805	574
138.044	575
138.044	576
138.048	577
138.048	578
138.287	579
138.288	580
138.291	581
138.292	582
138.531	583
138.535	584
138.772	585
138.774	586
138.776	587
138.778	588
139.017	589
139.019	590
139.02	591
139.26	592
139.263	593
139.263	594
139.501	595
139.502	596
139.505	597
139.506	598
139.744	599
139.746	600
139.747	601
139.749	602
139.986	603
139.988	604
139.99	605
139.992	606
140.229	607
140.231	608
140.233	609
140.236	610
140.472	611
140.474	612
140.475	613
140.478	614
140.715	615
140.716	616
140.719	617
140.72	618
140.959	619
140.959	620
140.963	621
141.201	622
141.204	623
141.205	624
141.444	625
141.447	626
141.45	627
141.686	628
141.687	629
141.69	630
141.927	631
141.928	632
141.931	633
141.932	634
142.171	635
142.172	636
142.175	637
142.412	638
142.414	639
142.416	640
142.418	641
142.656	642
142.659	643
142.66	644
142.898	645
142.901	646
142.902	647
143.139	648
143.141	649
143.143	650
143.145	651
143.383	652
143.386	653
143.387	654
143.624	655
143.626	656
143.628	657
143.63	658
143.866	659
143.87	660
143.87	661
144.108	662
144.11	663
144.112	664
144.113	665
144.352	666
144.353	667
144.356	668
144.357	669
144.595	670
144.596	671
144.599	672
144.599	673
144.838	674
144.841	675
145.079	676
145.081	677
145.083	678
145.085	679
145.322	680
145.323	681
145.326	682
145.327	683
145.565	684
145.568	685
145.569	686
145.808	687
145.809	688
145.812	689
146.049	690
146.05	691
146.052	692
146.054	693
146.291	694
146.293	695
146.295	696
146.296	697
146.535	698
146.535	699
146.539	700
146.777	701
146.778	702
146.78	703
146.781	704
147.018	705
147.02	706
147.022	707
147.024	708
147.261	709
147.265	710
147.265	711
147.505	712
147.507	713
147.509	714
147.746	715
147.747	716
147.749	717
147.751	718
147.989	719
147.991	720
147.992	721
148.23	722
148.232	723
148.234	724
148.236	725
148.474	726
148.474	727
148.478	728
148.716	729
148.72	730
148.956	731
148.958	732
148.96	733
148.961	734
149.199	735
149.2	736
149.202	737
149.204	738
149.441	739
149.442	740
149.444	741
149.446	742
149.683	743
149.684	744
149.686	745
149.688	746
149.925	747
149.927	748
149.929	749
149.931	750
150.167	751
150.169	752
150.17	753
150.172	754
150.409	755
150.411	756
150.413	757
150.415	758
150.651	759
150.652	760
150.655	761
150.656	762
150.895	763
150.898	764
151.135	765
151.137	766
151.139	767
151.14	768
151.377	769
151.378	770
151.38	771
151.382	772
151.619	773
151.62	774
151.622	775
151.624	776
151.862	777
151.863	778
151.866	779
152.103	780
152.105	781
152.106	782
152.108	783
152.344	784
152.347	785
152.348	786
152.35	787
152.587	788
152.588	789
152.59	790
152.592	791
152.829	792
152.83	793
152.832	794
152.836	795
153.073	796
153.073	797
153.077	798
153.313	799
153.314	800
153.316	801
153.318	802
153.555	803
153.556	804
153.558	805
153.56	806
153.798	807
153.798	808
153.802	809
154.04	810
154.042	811
154.044	812
154.28	813
154.281	814
154.283	815
154.286	816
154.522	817
154.523	818
154.525	819
154.527	820
154.763	821
154.765	822
154.767	823
154.768	824
155.005	825
155.007	826
155.009	827
155.012	828
155.247	829
155.249	830
155.251	831
155.253	832
155.49	833
155.491	834
155.493	835
155.495	836
155.731	837
155.733	838
155.734	839
155.737	840
155.973	841
155.974	842
155.976	843
156.215	844
156.216	845
156.218	846
156.22	847
156.456	848
156.458	849
156.46	850
156.461	851
156.698	852
156.699	853
156.701	854
156.702	855
156.939	856
156.941	857
156.942	858
156.945	859
157.18	860
157.182	861
157.184	862
157.186	863
157.422	864
157.424	865
157.426	866
157.428	867
157.664	868
157.665	869
157.667	870
157.67	871
157.907	872
157.908	873
157.911	874
158.146	875
158.148	876
158.149	877
158.151	878
158.387	879
158.389	880
158.391	881
158.393	882
158.63	883
158.632	884
158.634	885
158.87	886
158.871	887
158.873	888
159.113	889
159.115	890
159.117	891
159.353	892
159.354	893
159.356	894
159.593	895
159.595	896
159.597	897
159.599	898
159.835	899
159.836	900
159.838	901
159.84	902
160.076	903
160.077	904
160.08	905
160.08	906
160.319	907
160.32	908
160.56	909
160.561	910
160.563	911
160.8	912
160.801	913
160.803	914
161.041	915
161.043	916
161.045	917
161.283	918
161.284	919
161.286	920
161.289	921
161.524	922
161.526	923
161.527	924
161.765	925
161.766	926
161.769	927
162.006	928
162.008	929
162.009	930
162.011	931
162.246	932
162.248	933
162.25	934
162.253	935
162.488	936
162.489	937
162.492	938
162.493	939
162.729	940
162.73	941
162.732	942
162.733	943
162.969	944
162.971	945
162.973	946
163.211	947
163.212	948
163.214	949
163.451	950
163.453	951
163.454	952
163.694	953
163.695	954
163.698	955
163.933	956
163.935	957
163.936	958
164.174	959
164.176	960
164.177	961
164.18	962
164.415	963
164.417	964
164.418	965
164.42	966
164.657	967
164.66	968
164.662	969
164.896	970
164.898	971
164.9	972
165.137	973
165.138	974
165.14	975
165.142	976
165.377	977
165.378	978
165.381	979
165.617	980
165.619	981
165.621	982
165.859	983
165.859	984
165.863	985
166.098	986
166.1	987
166.101	988
166.338	989
166.34	990
166.341	991
166.578	992
166.58	993
166.582	994
166.584	995
166.818	996
166.82	997
166.822	998
166.824	999
167.058	1000
167.06	1001
167.062	1002
167.064	1003
167.299	1004
167.3	1005
167.303	1006
167.539	1007
167.54	1008
167.543	1009
167.546	1010
167.779	1011
167.78	1012
167.782	1013
167.783	1014
168.019	1015
168.02	1016
168.022	1017
168.259	1018
168.26	1019
168.262	1020
168.264	1021
168.499	1022
168.501	1023
168.502	1024
168.504	1025
168.74	1026
168.741	1027
168.745	1028
168.981	1029
168.982	1030
168.984	1031
169.221	1032
169.222	1033
169.224	1034
169.459	1035
169.461	1036
169.462	1037
169.465	1038
169.699	1039
169.701	1040
169.703	1041
169.704	1042
169.94	1043
169.942	1044
169.943	1045
169.945	1046
170.18	1047
170.182	1048
170.184	1049
170.42	1050
170.422	1051
170.423	1052
170.425	1053
170.66	1054
170.662	1055
170.664	1056
170.901	1057
170.903	1058
170.904	1059
171.14	1060
171.142	1061
171.143	1062
171.38	1063
171.381	1064
171.383	1065
171.62	1066
171.621	1067
171.624	1068
171.625	1069
171.859	1070
171.861	1071
171.863	1072
172.099	1073
172.101	1074
172.103	1075
172.339	1076
172.341	1077
172.342	1078
172.579	1079
172.58	1080
172.582	1081
172.82	1082
172.82	1083
173.058	1084
173.059	1085
173.061	1086
173.297	1087
173.299	1088
173.301	1089
173.537	1090
173.538	1091
173.54	1092
173.776	1093
173.778	1094
173.78	1095
174.015	1096
174.017	1097
174.019	1098
174.255	1099
174.256	1100
174.258	1101
174.26	1102
174.494	1103
174.496	1104
174.498	1105
174.733	1106
174.735	1107
174.737	1108
174.973	1109
174.975	1110
174.977	1111
174.978	1112
175.213	1113
175.214	1114
175.216	1115
175.452	1116
175.453	1117
175.456	1118
175.691	1119
175.692	1120
175.694	1121
175.696	1122
175.93	1123
175.932	1124
175.934	1125
176.171	1126
176.171	1127
176.409	1128
176.41	1129
176.412	1130
176.413	1131
176.648	1132
176.65	1133
176.652	1134
176.653	1135
176.888	1136
176.889	1137
176.891	1138
176.893	1139
177.129	1140
177.131	1141
177.133	1142
177.367	1143
177.368	1144
177.37	1145
177.606	1146
177.608	1147
177.609	1148
177.848	1149
177.848	1150
177.851	1151
178.086	1152
178.088	1153
178.089	1154
178.091	1155
178.326	1156
178.327	1157
178.329	1158
178.331	1159
178.565	1160
178.567	1161
178.568	1162
178.805	1163
178.806	1164
178.809	1165
178.81	1166
179.044	1167
179.046	1168
179.048	1169
179.284	1170
179.285	1171
179.288	1172
179.524	1173
179.525	1174
179.528	1175
179.764	1176
179.766	1177
179.768	1178
180.004	1179
180.006	1180
180.008	1181
180.244	1182
180.246	1183
180.248	1184
180.485	1185
180.486	1186
180.488	1187
180.724	1188
180.727	1189
180.963	1190
180.965	1191
181.203	1192
181.205	1193
181.444	1194
181.445	1195
181.447	1196
181.448	1197
181.684	1198
181.685	1199
181.687	1200
181.923	1201
181.925	1202
181.927	1203
182.164	1204
182.165	1205
182.168	1206
182.404	1207
182.405	1208
182.408	1209
182.643	1210
182.645	1211
182.647	1212
182.883	1213
182.884	1214
182.887	1215
183.123	1216
183.125	1217
183.127	1218
183.363	1219
183.365	1220
183.368	1221
183.603	1222
183.605	1223
183.843	1224
183.846	1225
183.847	1226
184.082	1227
184.084	1228
184.322	1229
184.323	1230
184.326	1231
184.329	1232
184.562	1233
184.565	1234
184.566	1235
184.802	1236
184.803	1237
185.042	1238
185.042	1239
185.045	1240
185.046	1241
185.282	1242
185.284	1243
185.286	1244
185.521	1245
185.522	1246
185.525	1247
185.761	1248
185.761	1249
185.764	1250
186.001	1251
186.002	1252
186.005	1253
186.241	1254
186.242	1255
186.245	1256
186.481	1257
186.482	1258
186.51	1259
186.721	1260
186.722	1261
186.725	1262
186.751	1263
186.96	1264
186.961	1265
186.965	1266
186.989	1267
187.2	1268
187.201	1269
187.205	1270
187.23	1271
187.439	1272
187.442	1273
187.468	1274
187.679	1275
187.68	1276
187.708	1277
187.918	1278
187.919	1279
187.922	1280
187.948	1281
188.159	1282
188.162	1283
188.162	1284
188.398	1285
188.398	1286
188.402	1287
188.427	1288
188.638	1289
188.639	1290
188.642	1291
188.642	1292
188.668	1293
188.878	1294
188.878	1295
188.881	1296
189.118	1297
189.118	1298
189.121	1299
189.122	1300
189.357	1301
189.358	1302
189.361	1303
189.597	1304
189.6	1305
189.837	1306
189.837	1307
189.841	1308
189.841	1309
190.077	1310
190.078	1311
190.081	1312
190.108	1313
190.316	1314
190.316	1315
190.32	1316
190.32	1317
190.345	1318
190.556	1319
190.558	1320
190.586	1321
190.796	1322
190.796	1323
190.799	1324
190.799	1325
191.035	1326
191.037	1327
191.039	1328
191.275	1329
191.275	1330
191.279	1331
191.515	1332
191.516	1333
191.519	1334
191.519	1335
191.754	1336
191.755	1337
191.758	1338
191.766	1339
191.993	1340
191.994	1341
191.997	1342
191.997	1343
192.234	1344
192.235	1345
192.474	1346
192.475	1347
192.477	1348
192.503	1349
192.714	1350
192.716	1351
192.718	1352
192.744	1353
192.954	1354
192.955	1355
192.958	1356
192.958	1357
192.983	1358
193.193	1359
193.195	1360
193.198	1361
193.222	1362
193.433	1363
193.433	1364
193.436	1365
193.438	1366
193.462	1367
193.673	1368
193.675	1369
193.676	1370
193.702	1371
193.913	1372
193.913	1373
193.916	1374
193.917	1375
193.942	1376
194.153	1377
194.154	1378
194.181	1379
194.392	1380
194.393	1381
194.396	1382
194.42	1383
194.631	1384
194.633	1385
194.635	1386
194.644	1387
194.871	1388
194.872	1389
194.875	1390
194.884	1391
195.11	1392
195.111	1393
195.114	1394
195.123	1395
195.349	1396
195.351	1397
195.353	1398
195.589	1399
195.589	1400
195.592	1401
195.593	1402
195.828	1403
195.83	1404
195.832	1405
195.841	1406
196.067	1407
196.069	1408
196.079	1409
196.307	1410
196.307	1411
196.31	1412
196.546	1413
196.546	1414
196.549	1415
196.549	1416
196.785	1417
196.787	1418
197.025	1419
197.025	1420
197.028	1421
197.028	1422
197.264	1423
197.268	1424
197.271	1425
197.504	1426
197.504	1427
197.508	1428
197.508	1429
197.743	1430
197.743	1431
197.746	1432
197.747	1433
197.982	1434
197.982	1435
197.986	1436
197.987	1437
198.222	1438
198.226	1439
198.226	1440
198.462	1441
198.462	1442
198.465	1443
198.466	1444
198.701	1445
198.703	1446
198.705	1447
198.714	1448
198.941	1449
198.942	1450
198.945	1451
199.181	1452
199.184	1453
199.184	1454
199.42	1455
199.423	1456
199.424	1457
199.659	1458
199.662	1459
199.663	1460
199.899	1461
199.9	1462
199.903	1463
199.911	1464
200.138	1465
200.141	1466
200.142	1467
200.377	1468
200.377	1469
200.381	1470
200.381	1471
200.616	1472
200.617	1473
200.62	1474
200.62	1475
200.856	1476
200.857	1477
201.095	1478
201.097	1479
201.107	1480
201.335	1481
201.335	1482
201.338	1483
201.338	1484
201.574	1485
201.574	1486
201.578	1487
201.578	1488
201.813	1489
201.813	1490
201.816	1491
201.816	1492
202.052	1493
202.052	1494
202.055	1495
202.056	1496
202.291	1497
202.291	1498
202.294	1499
202.295	1500
202.529	1501
202.53	1502
202.533	1503
202.533	1504
202.769	1505
202.771	1506
202.773	1507
203.008	1508
203.009	1509
203.247	1510
203.249	1511
203.25	1512
203.258	1513
203.486	1514
203.486	1515
203.489	1516
203.496	1517
203.725	1518
203.725	1519
203.728	1520
203.964	1521
203.964	1522
203.967	1523
204.203	1524
204.205	1525
204.214	1526
204.442	1527
204.442	1528
204.445	1529
204.681	1530
204.681	1531
204.684	1532
204.691	1533
204.92	1534
204.92	1535
204.924	1536
205.16	1537
205.161	1538
205.163	1539
205.171	1540
205.398	1541
205.398	1542
205.401	1543
205.403	1544
205.637	1545
205.637	1546
205.64	1547
205.876	1548
205.876	1549
205.879	1550
206.115	1551
206.115	1552
206.119	1553
206.354	1554
206.357	1555
206.357	1556
206.593	1557
206.594	1558
206.832	1559
206.833	1560
207.07	1561
207.07	1562
207.073	1563
207.309	1564
207.309	1565
207.312	1566
207.313	1567
207.547	1568
207.548	1569
207.551	1570
207.551	1571
207.786	1572
207.786	1573
207.789	1574
207.79	1575
208.025	1576
208.025	1577
208.028	1578
208.028	1579
208.263	1580
208.263	1581
208.266	1582
208.267	1583
208.502	1584
208.503	1585
208.512	1586
208.74	1587
208.742	1588
208.978	1589
208.978	1590
208.981	1591
209.216	1592
209.216	1593
209.22	1594
209.226	1595
209.454	1596
209.455	1597
209.457	1598
209.459	1599
209.693	1600
209.694	1601
209.93	1602
209.93	1603
209.934	1604
209.939	1605
210.168	1606
210.168	1607
210.171	1608
210.406	1609
210.406	1610
210.409	1611
210.409	1612
210.644	1613
210.644	1614
210.647	1615
210.881	1616
210.881	1617
210.884	1618
211.119	1619
211.121	1620
211.357	1621
211.358	1622
211.594	1623
211.596	1624
211.605	1625
211.832	1626
211.834	1627
211.835	1628
212.069	1629
212.069	1630
212.072	1631
212.307	1632
212.307	1633
212.31	1634
212.316	1635
212.544	1636
212.547	1637
212.553	1638
212.782	1639
212.784	1640
213.019	1641
213.019	1642
213.022	1643
213.023	1644
213.256	1645
213.258	1646
213.26	1647
213.494	1648
213.494	1649
213.497	1650
213.731	1651
213.732	1652
213.968	1653
213.971	1654
214.204	1655
214.204	1656
214.207	1657
214.441	1658
214.441	1659
214.444	1660
214.444	1661
214.677	1662
214.677	1663
214.68	1664
214.914	1665
214.914	1666
214.917	1667
215.15	1668
215.15	1669
215.153	1670
215.386	1671
215.386	1672
215.39	1673
215.622	1674
215.623	1675
215.859	1676
215.859	1677
215.862	1678
216.095	1679
216.096	1680
216.331	1681
216.331	1682
216.334	1683
216.567	1684
216.567	1685
216.57	1686
216.576	1687
216.802	1688
216.803	1689
216.805	1690
216.811	1691
217.038	1692
217.038	1693
217.041	1694
217.046	1695
217.274	1696
217.274	1697
217.277	1698
217.282	1699
217.509	1700
217.51	1701
217.513	1702
217.518	1703
217.745	1704
217.745	1705
217.748	1706
217.981	1707
217.981	1708
217.984	1709
217.985	1710
218.216	1711
218.217	1712
218.451	1713
218.451	1714
218.454	1715
218.685	1716
218.686	1717
218.689	1718
218.922	1719
218.925	1720
219.157	1721
219.16	1722
219.391	1723
219.391	1724
219.394	1725
219.399	1726
219.626	1727
219.629	1728
219.862	1729
219.862	1730
219.865	1731
219.87	1732
220.098	1733
220.101	1734
220.333	1735
220.333	1736
220.336	1737
220.336	1738
220.569	1739
220.57	1740
220.573	1741
220.803	1742
220.804	1743
220.808	1744
221.04	1745
221.04	1746
221.043	1747
221.275	1748
221.276	1749
221.279	1750
221.511	1751
221.511	1752
221.515	1753
221.747	1754
221.747	1755
221.75	1756
221.751	1757
221.983	1758
221.983	1759
221.986	1760
222.219	1761
222.219	1762
222.222	1763
222.454	1764
222.454	1765
222.457	1766
222.462	1767
222.69	1768
222.692	1769
222.693	1770
222.925	1771
222.926	1772
222.929	1773
222.929	1774
223.161	1775
223.161	1776
223.164	1777
223.169	1778
223.396	1779
223.396	1780
223.399	1781
223.405	1782
223.631	1783
223.632	1784
223.635	1785
223.64	1786
223.867	1787
223.867	1788
223.87	1789
223.875	1790
224.102	1791
224.103	1792
224.106	1793
224.111	1794
224.338	1795
224.338	1796
224.341	1797
224.346	1798
224.572	1799
224.572	1800
224.575	1801
224.58	1802
224.807	1803
224.808	1804
224.811	1805
225.039	1806
225.04	1807
225.042	1808
225.044	1809
225.274	1810
225.275	1811
225.278	1812
225.283	1813
225.509	1814
225.509	1815
225.512	1816
225.513	1817
225.744	1818
225.744	1819
225.747	1820
225.752	1821
225.976	1822
225.977	1823
225.979	1824
225.981	1825
226.211	1826
226.211	1827
226.214	1828
226.219	1829
226.444	1830
226.444	1831
226.447	1832
226.452	1833
226.677	1834
226.678	1835
226.681	1836
226.685	1837
226.91	1838
226.911	1839
226.914	1840
226.919	1841
227.144	1842
227.146	1843
227.147	1844
227.376	1845
227.377	1846
227.379	1847
227.381	1848
227.61	1849
227.611	1850
227.614	1851
227.619	1852
227.843	1853
227.843	1854
227.846	1855
227.851	1856
228.077	1857
228.077	1858
228.08	1859
228.082	1860
228.309	1861
228.309	1862
228.313	1863
228.317	1864
228.542	1865
228.542	1866
228.546	1867
228.55	1868
228.775	1869
228.775	1870
228.778	1871
228.783	1872
229.008	1873
229.008	1874
229.011	1875
229.016	1876
229.241	1877
229.242	1878
229.244	1879
229.473	1880
229.474	1881
229.476	1882
229.481	1883
229.704	1884
229.706	1885
229.707	1886
229.709	1887
229.939	1888
229.94	1889
229.943	1890
229.947	1891
230.171	1892
230.171	1893
230.175	1894
230.18	1895
230.405	1896
230.405	1897
230.408	1898
230.413	1899
230.637	1900
230.638	1901
230.641	1902
230.646	1903
230.87	1904
230.87	1905
230.874	1906
230.878	1907
231.103	1908
231.103	1909
231.107	1910
231.111	1911
231.335	1912
231.336	1913
231.34	1914
231.343	1915
231.568	1916
231.568	1917
231.571	1918
231.576	1919
231.801	1920
231.801	1921
231.804	1922
231.809	1923
232.034	1924
232.034	1925
232.037	1926
232.042	1927
232.267	1928
232.268	1929
232.27	1930
232.499	1931
232.5	1932
232.503	1933
232.508	1934
232.732	1935
232.732	1936
232.74	1937
232.743	1938
232.964	1939
232.964	1940
232.968	1941
232.972	1942
233.196	1943
233.197	1944
233.2	1945
233.205	1946
233.429	1947
233.429	1948
233.437	1949
233.439	1950
233.661	1951
233.661	1952
233.665	1953
233.669	1954
233.892	1955
233.894	1956
233.895	1957
233.906	1958
234.126	1959
234.126	1960
234.13	1961
234.134	1962
234.358	1963
234.358	1964
234.366	1965
234.59	1966
234.591	1967
234.594	1968
234.598	1969
234.822	1970
234.823	1971
234.827	1972
235.054	1973
235.055	1974
235.066	1975
235.287	1976
235.287	1977
235.29	1978
235.294	1979
235.518	1980
235.519	1981
235.523	1982
235.527	1983
235.749	1984
235.75	1985
235.752	1986
235.754	1987
235.981	1988
235.983	1989
235.984	1990
235.987	1991
236.214	1992
236.215	1993
236.223	1994
236.446	1995
236.446	1996
236.45	1997
236.678	1998
236.678	1999
[truncated: 12,810 more rows]
