# Supplementary material for: A temperature- and stress-controlled failure criterion for ice-filledpermafrost rock joints
Source: Copernicus journal article supplement (doi:10.5194/tc-2018-57), 2018-03-28
Supplement: Supplementary file 1 [file tc-2018-57-supplement.zip › Suppl. material_Mamot et al/data_timeseries_acoustic_exp5c_WSK_spec1_Fig. 5.xlsx]

## Sheet: Sheet1
time_sec	hits_cumulative
0.715513	1
0.927452	2
0.929204	3
1.14053	4
1.14209	5
1.3532	6
1.3549	7
1.56583	8
1.56752	9
1.77816	10
1.77973	11
1.99042	12
1.99164	13
2.20445	14
12.5941	15
12.8108	16
13.0275	17
13.2439	18
13.4603	19
13.677	20
13.8939	21
14.3281	22
14.5451	23
14.7625	24
14.9166	25
15.4091	26
15.9109	27
15.9123	28
15.9162	29
16.1434	30
16.2056	31
16.207	32
16.3776	33
16.7123	34
16.7138	35
18.6759	36
28.3966	37
30.079	38
30.318	39
30.5573	40
31.2732	41
31.4133	42
31.4143	43
31.5117	44
31.6516	45
31.6533	46
31.7507	47
31.8904	48
31.8919	49
32.1339	50
46.4959	51
50.7852	52
52.0499	53
52.5583	54
54.0662	55
54.5669	56
54.8173	57
59.2017	58
61.4499	59
61.705	60
61.9599	61
64.5608	62
72.1417	63
73.3726	64
231.518	65
238.868	66
238.874	67
238.896	68
239.758	69
239.762	70
239.764	71
240.532	72
240.834	73
252.263	74
252.329	75
252.653	76
253.857	77
253.862	78
254.163	79
254.166	80
254.59	81
254.969	82
254.975	83
255.189	84
260.523	85
379.032	86
379.033	87
385.696	88
385.698	89
407.258	90
447.794	91
447.795	92
448.007	93
448.239	94
448.263	95
448.264	96
448.288	97
448.495	98
448.497	99
448.707	100
448.709	101
448.728	102
448.73	103
448.941	104
448.942	105
448.963	106
449.175	107
449.177	108
450.609	109
450.611	110
450.84	111
450.842	112
451.055	113
451.056	114
451.075	115
451.076	116
451.288	117
451.289	118
451.308	119
451.31	120
451.521	121
451.523	122
451.542	123
451.543	124
451.756	125
451.757	126
451.776	127
451.778	128
451.99	129
451.991	130
452.224	131
452.226	132
452.458	133
452.46	134
452.693	135
452.694	136
452.927	137
452.928	138
453.893	139
454.807	140
454.833	141
454.834	142
456.004	143
456.005	144
456.706	145
456.707	146
456.94	147
456.942	148
456.963	149
456.964	150
456.989	151
456.99	152
457.151	153
457.152	154
457.171	155
457.172	156
457.179	157
457.18	158
457.384	159
457.386	160
457.403	161
457.405	162
457.409	163
457.432	164
457.434	165
457.544	166
457.545	167
457.617	168
457.618	169
457.64	170
457.641	171
457.801	172
457.802	173
457.827	174
457.828	175
457.849	176
457.851	177
458.058	178
458.06	179
458.086	180
458.791	181
459.521	182
459.522	183
459.732	184
459.965	185
459.988	186
459.99	187
464.063	188
464.065	189
465.014	190
465.016	191
487.312	192
487.314	193
490.693	194
490.695	195
510.213	196
510.215	197
525.649	198
527.619	199
527.62	200
534.57	201
534.571	202
535.501	203
536.617	204
537.719	205
537.72	206
538.495	207
538.85	208
538.851	209
539.191	210
540.165	211
540.166	212
540.461	213
541.039	214
541.041	215
541.694	216
541.695	217
541.897	218
541.897	219
542.054	220
542.055	221
542.192	222
542.426	223
542.428	224
542.684	225
542.919	226
542.92	227
543.104	228
543.105	229
543.159	230
544.069	231
544.133	232
544.135	233
544.69	234
544.739	235
544.74	236
545.642	237
545.643	238
545.724	239
545.725	240
546.32	241
546.321	242
547.269	243
547.27	244
547.383	245
547.384	246
548.077	247
548.669	248
548.671	249
548.722	250
548.724	251
548.739	252
549.094	253
549.148	254
549.174	255
549.175	256
549.289	257
549.379	258
549.963	259
550.737	260
551.045	261
551.046	262
551.373	263
551.375	264
551.408	265
551.409	266
551.723	267
551.724	268
551.768	269
551.769	270
551.929	271
551.931	272
552.23	273
552.245	274
552.25	275
552.885	276
552.886	277
552.981	278
552.983	279
553.041	280
553.042	281
553.053	282
553.054	283
553.312	284
553.519	285
553.815	286
553.821	287
553.822	288
553.984	289
553.985	290
553.989	291
553.992	292
554.03	293
554.031	294
554.452	295
554.453	296
554.641	297
554.827	298
554.829	299
554.897	300
554.899	301
555.093	302
555.142	303
555.143	304
555.239	305
555.37	306
555.372	307
555.473	308
555.475	309
555.532	310
555.556	311
555.557	312
555.642	313
555.718	314
555.719	315
555.784	316
555.785	317
555.892	318
555.893	319
555.96	320
555.961	321
556.03	322
556.031	323
556.096	324
556.097	325
556.301	326
556.445	327
556.446	328
556.46	329
556.462	330
556.477	331
556.479	332
556.492	333
556.686	334
556.687	335
556.728	336
556.729	337
556.773	338
556.775	339
556.987	340
557.035	341
557.037	342
557.349	343
557.35	344
557.437	345
557.439	346
557.56	347
557.643	348
557.645	349
557.675	350
557.676	351
557.713	352
557.715	353
557.768	354
557.769	355
557.912	356
557.913	357
557.953	358
558.003	359
558.004	360
558.039	361
558.041	362
558.092	363
558.093	364
558.2	365
558.253	366
558.29	367
558.291	368
558.369	369
558.384	370
558.386	371
558.424	372
558.426	373
558.482	374
558.483	375
558.568	376
558.569	377
558.596	378
558.68	379
558.681	380
558.782	381
558.784	382
558.835	383
558.836	384
558.838	385
558.84	386
558.955	387
558.956	388
558.978	389
559.152	390
559.2	391
559.201	392
559.305	393
559.329	394
559.33	395
559.455	396
559.457	397
559.486	398
559.546	399
559.547	400
559.572	401
559.595	402
559.618	403
559.625	404
559.637	405
559.638	406
559.656	407
559.679	408
559.692	409
559.696	410
559.746	411
559.747	412
559.792	413
559.827	414
559.893	415
559.895	416
559.912	417
559.913	418
559.943	419
559.991	420
559.992	421
560.1	422
560.1	423
560.178	424
560.198	425
560.2	426
560.205	427
560.207	428
560.222	429
560.231	430
560.298	431
560.425	432
560.426	433
560.44	434
560.442	435
560.463	436
560.464	437
560.493	438
560.496	439
560.505	440
560.521	441
560.522	442
560.543	443
560.544	444
560.599	445
560.6	446
560.651	447
560.666	448
560.675	449
560.696	450
560.807	451
560.809	452
560.816	453
560.818	454
560.883	455
560.888	456
560.926	457
560.927	458
560.969	459
560.97	460
561.003	461
561.027	462
561.029	463
561.108	464
561.115	465
561.116	466
561.138	467
561.139	468
561.183	469
561.184	470
561.213	471
561.215	472
561.23	473
561.231	474
561.278	475
561.3	476
561.301	477
561.319	478
561.32	479
561.392	480
561.393	481
561.396	482
561.398	483
561.412	484
561.443	485
561.444	486
561.46	487
561.461	488
561.474	489
561.553	490
561.559	491
561.634	492
561.664	493
561.664	494
561.709	495
561.731	496
561.77	497
561.771	498
561.774	499
561.776	500
561.813	501
561.814	502
561.881	503
561.882	504
561.893	505
561.901	506
561.928	507
561.945	508
561.946	509
561.964	510
562.011	511
562.012	512
562.025	513
562.05	514
562.051	515
562.061	516
562.081	517
562.103	518
562.127	519
562.127	520
562.146	521
562.147	522
562.229	523
562.258	524
562.27	525
562.277	526
562.293	527
562.298	528
562.309	529
562.311	530
562.34	531
562.34	532
562.357	533
562.357	534
562.375	535
562.392	536
562.396	537
562.509	538
562.51	539
562.533	540
562.534	541
562.563	542
562.573	543
562.607	544
562.608	545
562.627	546
562.742	547
562.744	548
562.792	549
