# Supplementary material for: A temperature- and stress-controlled failure criterion for ice-filledpermafrost rock joints
Source: Copernicus journal article supplement (doi:10.5194/tc-2018-57), 2018-03-28
Supplement: Supplementary file 1 [file tc-2018-57-supplement.zip › Suppl. material_Mamot et al/data_timeseries_acoustic_exp5c_WSK_spec2_Fig. 5.xlsx]

## Sheet: Sheet1
time_sec	hits_cumulative
6.88619	1
7.09984	2
8.14291	3
8.3248	4
21.963	5
22.3745	6
22.3757	7
22.4228	8
22.4241	9
27.7341	10
468.753	11
605.163	12
605.163	13
606.488	14
610.733	15
610.734	16
611.503	17
612.017	18
617.341	19
617.472	20
617.473	21
617.69	22
617.691	23
617.866	24
620.804	25
621.076	26
623.186	27
623.835	28
623.947	29
624.037	30
624.139	31
624.276	32
624.814	33
624.925	34
624.926	35
625.079	36
625.08	37
625.192	38
625.402	39
625.403	40
625.418	41
625.429	42
625.619	43
625.893	44
625.894	45
626.034	46
626.076	47
626.131	48
626.132	49
626.649	50
626.65	51
626.844	52
627.228	53
627.412	54
627.493	55
627.857	56
627.866	57
627.867	58
627.892	59
627.899	60
628.181	61
628.363	62
628.814	63
628.95	64
629.196	65
629.362	66
629.388	67
629.932	68
630.528	69
630.633	70
630.634	71
630.688	72
630.785	73
631.084	74
631.085	75
631.305	76
631.695	77
631.696	78
640.033	79
640.327	80
643.26	81
643.639	82
644.095	83
644.096	84
646.357	85
647.543	86
647.544	87
650.696	88
650.696	89
654.332	90
654.333	91
658.704	92
659.463	93
660.306	94
660.307	95
660.813	96
665.834	97
665.834	98
666.31	99
666.311	100
668.312	101
668.313	102
669.168	103
669.169	104
671.423	105
671.424	106
672.081	107
672.082	108
672.108	109
673.418	110
673.419	111
677.48	112
677.481	113
679.341	114
684.165	115
684.166	116
684.705	117
686.596	118
687.091	119
687.28	120
687.281	121
688.065	122
688.066	123
688.212	124
688.213	125
689.361	126
690.168	127
690.388	128
690.451	129
690.613	130
691.106	131
691.791	132
693.32	133
694.39	134
694.962	135
697.732	136
697.733	137
698.509	138
702.712	139
703.669	140
703.67	141
704.446	142
704.447	143
704.548	144
705.024	145
705.042	146
706.961	147
706.962	148
707.411	149
708.236	150
708.236	151
709.317	152
709.318	153
710.263	154
711.48	155
711.722	156
711.722	157
712.005	158
712.332	159
712.332	160
712.818	161
712.895	162
713.304	163
713.305	164
713.514	165
713.515	166
713.948	167
713.949	168
714.01	169
714.011	170
714.044	171
714.318	172
714.52	173
714.521	174
714.643	175
714.644	176
714.659	177
714.66	178
714.859	179
714.859	180
714.923	181
714.924	182
715.2	183
715.206	184
715.787	185
715.788	186
715.828	187
715.829	188
715.849	189
716.123	190
716.124	191
716.176	192
716.176	193
716.305	194
716.306	195
716.486	196
716.486	197
716.691	198
716.692	199
716.787	200
716.788	201
716.803	202
716.843	203
716.844	204
716.889	205
716.89	206
717.297	207
717.298	208
717.632	209
718.097	210
718.098	211
718.361	212
718.365	213
718.366	214
718.739	215
718.788	216
718.788	217
719.18	218
719.233	219
719.508	220
719.508	221
719.527	222
719.6	223
719.601	224
719.785	225
719.786	226
719.885	227
719.992	228
720.051	229
720.052	230
720.172	231
720.172	232
720.304	233
720.304	234
720.364	235
720.365	236
720.424	237
720.599	238
720.6	239
720.646	240
720.726	241
720.983	242
721.05	243
721.052	244
721.066	245
721.067	246
721.091	247
721.16	248
721.169	249
721.17	250
721.2	251
721.201	252
721.207	253
721.207	254
721.224	255
721.258	256
721.261	257
721.263	258
721.357	259
721.659	260
721.754	261
721.755	262
721.839	263
721.84	264
721.882	265
721.882	266
721.896	267
721.897	268
722.098	269
722.099	270
722.152	271
722.153	272
722.286	273
722.287	274
722.351	275
722.352	276
722.366	277
722.366	278
722.424	279
722.46	280
722.461	281
722.51	282
722.511	283
722.533	284
722.809	285
722.809	286
722.836	287
723.079	288
723.085	289
723.087	290
723.152	291
723.153	292
723.287	293
723.288	294
723.308	295
723.309	296
723.561	297
723.562	298
723.632	299
723.686	300
723.686	301
723.826	302
724.007	303
724.008	304
724.215	305
724.215	306
724.23	307
724.231	308
724.246	309
724.25	310
724.276	311
724.277	312
724.376	313
724.377	314
724.615	315
724.615	316
724.696	317
724.749	318
724.852	319
724.853	320
725.016	321
725.017	322
725.041	323
725.042	324
725.115	325
725.116	326
725.229	327
725.23	328
725.293	329
725.294	330
725.305	331
725.306	332
725.319	333
725.323	334
725.338	335
725.355	336
725.36	337
725.409	338
725.41	339
725.49	340
725.49	341
725.596	342
725.63	343
725.631	344
725.64	345
725.642	346
725.692	347
725.693	348
725.698	349
725.827	350
725.827	351
725.874	352
725.874	353
725.948	354
725.948	355
725.989	356
725.99	357
726.031	358
726.202	359
726.203	360
726.21	361
726.211	362
726.243	363
726.243	364
726.366	365
726.407	366
726.423	367
726.424	368
726.428	369
726.43	370
726.494	371
726.495	372
726.536	373
726.574	374
726.575	375
726.605	376
726.605	377
726.62	378
726.62	379
726.734	380
726.748	381
726.776	382
726.777	383
726.793	384
726.793	385
726.823	386
726.824	387
726.908	388
726.909	389
726.937	390
726.978	391
726.979	392
727.078	393
727.126	394
727.127	395
727.131	396
727.134	397
727.166	398
727.211	399
727.211	400
727.221	401
727.222	402
727.244	403
727.266	404
727.349	405
727.349	406
727.359	407
727.463	408
727.464	409
727.489	410
727.508	411
727.636	412
727.713	413
727.72	414
727.72	415
727.743	416
727.744	417
727.784	418
727.833	419
727.833	420
727.838	421
727.894	422
727.91	423
727.911	424
727.933	425
727.934	426
727.94	427
727.943	428
727.97	429
727.996	430
727.997	431
728.045	432
728.096	433
728.102	434
728.102	435
728.14	436
728.141	437
728.179	438
728.179	439
728.211	440
728.211	441
728.229	442
728.23	443
728.281	444
728.331	445
728.371	446
728.372	447
728.441	448
728.457	449
728.529	450
728.553	451
728.554	452
728.626	453
728.627	454
728.645	455
728.646	456
728.668	457
728.669	458
728.678	459
728.706	460
728.851	461
728.852	462
728.861	463
728.863	464
728.885	465
728.887	466
728.958	467
728.959	468
729.028	469
729.052	470
729.052	471
729.126	472
729.162	473
729.163	474
729.199	475
729.199	476
729.217	477
729.218	478
729.224	479
729.284	480
729.308	481
729.34	482
729.341	483
729.407	484
729.407	485
729.441	486
729.442	487
729.482	488
729.483	489
729.596	490
729.597	491
729.618	492
729.634	493
729.634	494
729.644	495
729.672	496
729.746	497
729.746	498
729.794	499
729.795	500
729.856	501
729.858	502
729.86	503
729.911	504
729.911	505
729.92	506
729.927	507
729.936	508
730.026	509
730.027	510
730.055	511
730.06	512
730.061	513
730.068	514
730.074	515
730.11	516
730.111	517
730.169	518
730.177	519
730.179	520
730.22	521
730.22	522
730.228	523
730.276	524
730.277	525
730.312	526
730.313	527
730.338	528
730.339	529
730.403	530
730.403	531
730.419	532
730.42	533
730.492	534
730.493	535
730.503	536
730.532	537
730.532	538
730.594	539
730.595	540
730.744	541
730.745	542
730.749	543
730.777	544
730.785	545
730.845	546
730.846	547
730.927	548
730.938	549
