# Supplementary material for: A temperature- and stress-controlled failure criterion for ice-filledpermafrost rock joints
Source: Copernicus journal article supplement (doi:10.5194/tc-2018-57), 2018-03-28
Supplement: Supplementary file 1 [file tc-2018-57-supplement.zip › Suppl. material_Mamot et al/data_timeseries_acoustic_exp5c_WSK_spec3_Fig. 5.xlsx]

## Sheet: Sheet1
time_sec	hits_cumulative
4.38863	1
5.08883	2
5.84138	3
6.52361	4
6.52532	5
6.75383	6
7.15227	7
7.15395	8
14.0739	9
14.8093	10
15.0531	11
16.0579	12
16.0597	13
16.3116	14
16.3134	15
34.5814	16
34.5831	17
34.8282	18
34.8299	19
35.0767	20
35.0785	21
35.3255	22
35.3273	23
35.5761	24
35.8237	25
35.8255	26
36.0731	27
36.0749	28
36.3223	29
36.3242	30
37.0714	31
39.813	32
41.5573	33
42.5543	34
43.0534	35
43.8016	36
54.3245	37
75.7445	38
75.7462	39
144.614	40
150.335	41
150.852	42
151.369	43
152.925	44
153.184	45
153.443	46
153.701	47
156.559	48
158.901	49
161.24	50
162.021	51
162.544	52
162.803	53
163.585	54
163.844	55
164.367	56
164.888	57
165.408	58
165.931	59
168.02	60
171.413	61
171.675	62
173.234	63
174.012	64
174.271	65
174.534	66
175.053	67
176.096	68
176.356	69
177.137	70
177.913	71
177.915	72
178.697	73
179.741	74
179.999	75
180.261	76
180.78	77
181.04	78
181.558	79
182.079	80
182.339	81
182.858	82
183.117	83
183.377	84
183.638	85
183.897	86
184.677	87
184.938	88
185.197	89
185.455	90
185.715	91
185.974	92
186.236	93
186.497	94
186.757	95
187.018	96
187.278	97
187.539	98
188.059	99
188.317	100
188.577	101
189.097	102
189.878	103
190.138	104
190.398	105
190.658	106
190.918	107
191.177	108
191.438	109
191.699	110
191.959	111
192.219	112
192.74	113
193.001	114
193.26	115
193.261	116
193.52	117
193.521	118
193.782	119
194.042	120
194.303	121
194.823	122
195.084	123
195.605	124
196.125	125
196.386	126
197.168	127
197.69	128
197.949	129
198.209	130
198.47	131
198.989	132
199.25	133
199.511	134
200.292	135
200.552	136
200.813	137
201.334	138
202.116	139
202.377	140
202.637	141
202.897	142
203.158	143
203.679	144
203.94	145
211.62	146
212.147	147
212.149	148
212.677	149
214.527	150
214.528	151
215.054	152
215.316	153
215.578	154
215.838	155
216.098	156
216.099	157
216.36	158
217.143	159
217.402	160
217.404	161
217.664	162
217.925	163
218.186	164
218.446	165
218.707	166
219.228	167
219.489	168
219.75	169
220.01	170
220.532	171
221.052	172
221.835	173
222.095	174
222.355	175
222.875	176
223.395	177
223.915	178
224.175	179
224.434	180
224.954	181
225.475	182
225.733	183
225.735	184
226.256	185
226.516	186
226.777	187
227.036	188
227.296	189
228.075	190
228.335	191
230.414	192
230.933	193
231.972	194
232.233	195
232.752	196
234.051	197
234.831	198
235.612	199
236.131	200
238.993	201
239.253	202
240.295	203
240.554	204
242.904	205
244.21	206
244.47	207
244.73	208
244.99	209
245.77	210
247.073	211
247.592	212
247.852	213
248.894	214
249.156	215
249.677	216
250.974	217
251.235	218
251.757	219
252.537	220
253.058	221
253.318	222
253.579	223
254.1	224
254.36	225
254.878	226
255.136	227
255.654	228
256.692	229
257.468	230
257.726	231
257.984	232
258.501	233
258.761	234
259.02	235
260.572	236
261.089	237
261.603	238
262.634	239
263.151	240
264.437	241
286.956	242
295.071	243
301.143	244
305.441	245
307.207	246
310.244	247
313.534	248
314.549	249
315.311	250
316.329	251
317.596	252
317.85	253
319.878	254
320.386	255
322.652	256
323.648	257
325.644	258
325.892	259
326.14	260
326.388	261
327.382	262
328.378	263
328.628	264
328.876	265
329.374	266
329.621	267
329.622	268
330.122	269
330.372	270
330.621	271
331.12	272
331.619	273
332.867	274
333.616	275
333.866	276
334.361	277
334.865	278
335.115	279
335.614	280
336.623	281
336.876	282
337.126	283
337.881	284
338.133	285
338.383	286
339.137	287
339.386	288
339.887	289
340.637	290
341.138	291
342.139	292
342.391	293
342.644	294
342.892	295
343.143	296
343.648	297
343.901	298
344.152	299
344.152	300
344.401	301
344.655	302
344.91	303
345.157	304
345.659	305
345.66	306
345.911	307
346.159	308
346.909	309
347.157	310
347.407	311
347.66	312
347.907	313
348.16	314
348.407	315
348.659	316
348.906	317
349.406	318
349.656	319
349.904	320
349.905	321
350.155	322
350.403	323
350.405	324
350.655	325
350.901	326
350.902	327
351.152	328
351.399	329
351.4	330
351.648	331
351.896	332
352.143	333
352.144	334
352.392	335
352.394	336
352.64	337
352.641	338
353.136	339
353.387	340
353.632	341
353.633	342
353.883	343
354.131	344
354.132	345
354.378	346
354.379	347
354.626	348
354.627	349
354.873	350
354.875	351
355.123	352
355.37	353
355.371	354
355.618	355
355.619	356
355.868	357
356.115	358
356.361	359
356.363	360
356.611	361
356.859	362
357.106	363
357.352	364
357.597	365
357.598	366
357.847	367
358.091	368
358.338	369
358.585	370
358.833	371
359.077	372
359.078	373
359.323	374
359.57	375
359.818	376
360.063	377
360.064	378
360.31	379
360.558	380
360.801	381
360.802	382
361.047	383
361.293	384
361.539	385
361.786	386
362.033	387
362.278	388
362.279	389
362.527	390
362.774	391
362.776	392
363.021	393
363.268	394
363.27	395
363.514	396
363.516	397
363.76	398
363.761	399
364.006	400
364.008	401
364.253	402
364.255	403
364.498	404
364.5	405
364.745	406
364.991	407
365.483	408
365.725	409
365.726	410
365.972	411
366.217	412
366.708	413
366.954	414
366.955	415
367.198	416
367.199	417
367.447	418
367.692	419
367.694	420
367.937	421
367.939	422
368.182	423
368.183	424
368.428	425
368.673	426
368.674	427
368.918	428
368.919	429
369.164	430
369.165	431
369.41	432
369.412	433
369.657	434
369.658	435
369.905	436
370.147	437
370.149	438
370.394	439
370.395	440
370.639	441
370.641	442
370.884	443
370.886	444
371.131	445
371.374	446
371.376	447
371.622	448
371.865	449
372.112	450
372.356	451
372.356	452
372.602	453
372.847	454
373.092	455
373.093	456
373.335	457
373.337	458
373.583	459
373.826	460
373.827	461
374.071	462
374.072	463
374.317	464
374.318	465
374.561	466
374.562	467
374.805	468
375.049	469
375.05	470
375.295	471
375.539	472
375.783	473
375.784	474
376.031	475
376.273	476
376.274	477
376.52	478
376.762	479
377.007	480
377.008	481
377.253	482
377.498	483
377.742	484
377.988	485
378.232	486
378.475	487
378.477	488
378.721	489
378.965	490
379.209	491
379.698	492
380.186	493
380.675	494
380.919	495
381.408	496
381.652	497
381.896	498
382.141	499
382.384	500
382.63	501
382.874	502
383.606	503
383.85	504
384.095	505
384.338	506
384.582	507
385.071	508
385.316	509
385.805	510
386.293	511
386.537	512
387.025	513
387.757	514
388.001	515
389.953	516
390.927	517
395.312	518
396.529	519
402.787	520
409.845	521
416.34	522
416.58	523
419.941	524
420.662	525
421.146	526
422.12	527
423.367	528
423.618	529
423.867	530
424.367	531
424.617	532
424.619	533
424.871	534
425.123	535
425.374	536
425.375	537
425.627	538
425.88	539
426.13	540
426.132	541
426.382	542
426.384	543
427.141	544
427.391	545
427.393	546
427.644	547
427.645	548
427.897	549
