# Supplementary material for: A temperature- and stress-controlled failure criterion for ice-filledpermafrost rock joints
Source: Copernicus journal article supplement (doi:10.5194/tc-2018-57), 2018-03-28
Supplement: Supplementary file 1 [file tc-2018-57-supplement.zip › Suppl. material_Mamot et al/data_timeseries_acoustic_exp5c_WSK_spec4_Fig. 5.xlsx]

## Sheet: Sheet1
time_sec	hits_cumulative
8.1786	1
8.25273	2
8.28051	3
8.31175	4
8.31211	5
8.3152	6
8.38679	7
8.4261	8
8.44138	9
8.45107	10
8.49325	11
8.6329	12
8.64682	13
8.65643	14
8.65749	15
8.66072	16
8.67149	17
9.41745	18
9.42163	19
9.62031	20
10.839	21
11.0713	22
11.2196	23
11.2232	24
13.9867	25
13.9879	26
17.9655	27
18.5294	28
19.0274	29
23.4611	30
27.964	31
47.0804	32
54.952	33
54.9533	34
56.4395	35
56.4408	36
56.8068	37
56.8081	38
64.3239	39
64.4223	40
64.4293	41
64.4633	42
111.866	43
134.045	44
558.327	45
563.595	46
564.45	47
564.451	48
568.734	49
568.904	50
569.242	51
569.243	52
575.112	53
575.238	54
575.365	55
575.867	56
576.435	57
577.439	58
577.44	59
577.936	60
577.937	61
578.018	62
578.019	63
579.036	64
579.193	65
580.491	66
582.076	67
582.082	68
583.798	69
584.375	70
584.514	71
584.515	72
584.527	73
584.83	74
584.831	75
585.177	76
585.178	77
585.398	78
585.399	79
585.416	80
585.665	81
585.666	82
585.815	83
585.818	84
585.82	85
587.092	86
587.961	87
587.961	88
588.444	89
589.46	90
590.074	91
590.074	92
590.373	93
590.824	94
590.825	95
591.183	96
591.184	97
591.51	98
591.511	99
591.981	100
592.054	101
592.055	102
592.484	103
592.485	104
592.527	105
592.826	106
592.827	107
592.852	108
592.853	109
593.036	110
593.398	111
593.398	112
593.457	113
593.466	114
593.467	115
593.502	116
593.503	117
593.511	118
593.711	119
593.826	120
593.827	121
594.192	122
594.193	123
594.834	124
595.169	125
595.287	126
595.314	127
595.315	128
596.343	129
596.344	130
596.435	131
596.436	132
596.646	133
596.948	134
596.999	135
597.034	136
597.196	137
597.377	138
597.579	139
597.58	140
597.603	141
597.604	142
597.62	143
597.621	144
597.858	145
597.859	146
597.987	147
597.988	148
598.05	149
598.06	150
598.061	151
598.447	152
598.497	153
598.498	154
598.706	155
599.131	156
599.509	157
599.51	158
599.607	159
599.644	160
599.645	161
599.676	162
599.677	163
599.923	164
599.924	165
600.026	166
600.256	167
600.257	168
600.385	169
600.386	170
600.64	171
600.641	172
600.712	173
600.723	174
600.724	175
600.967	176
601.083	177
601.165	178
601.166	179
601.268	180
601.269	181
601.32	182
601.321	183
601.387	184
601.388	185
601.416	186
601.417	187
601.679	188
601.68	189
601.788	190
601.79	191
601.817	192
601.864	193
601.865	194
601.968	195
601.968	196
602.05	197
602.052	198
602.055	199
602.11	200
602.111	201
602.237	202
602.238	203
602.254	204
602.279	205
602.28	206
602.39	207
602.427	208
602.428	209
602.436	210
602.517	211
602.563	212
602.675	213
602.676	214
602.791	215
602.792	216
602.803	217
602.804	218
602.987	219
602.988	220
602.992	221
602.994	222
603.063	223
603.092	224
603.234	225
603.34	226
603.341	227
603.372	228
603.422	229
603.501	230
603.502	231
603.566	232
603.567	233
603.689	234
603.69	235
604.036	236
604.037	237
604.223	238
604.224	239
604.287	240
604.349	241
604.35	242
604.64	243
604.713	244
604.814	245
604.815	246
604.836	247
604.913	248
605.017	249
605.018	250
605.071	251
605.078	252
605.079	253
605.134	254
605.135	255
605.179	256
605.18	257
605.228	258
605.229	259
605.242	260
605.35	261
605.452	262
605.674	263
605.701	264
605.702	265
606.193	266
606.194	267
606.266	268
606.267	269
606.37	270
606.37	271
606.386	272
606.386	273
606.395	274
606.442	275
606.488	276
606.514	277
606.537	278
606.614	279
606.615	280
606.633	281
606.672	282
606.674	283
606.842	284
607.128	285
607.129	286
607.726	287
607.78	288
607.781	289
607.791	290
607.855	291
607.856	292
607.882	293
607.9	294
607.99	295
607.991	296
608.046	297
608.047	298
608.14	299
608.235	300
608.276	301
608.277	302
608.286	303
608.286	304
608.34	305
608.508	306
608.575	307
608.632	308
608.686	309
608.793	310
608.879	311
608.88	312
608.991	313
608.992	314
609.012	315
609.046	316
609.047	317
609.072	318
609.085	319
609.125	320
609.162	321
609.36	322
609.396	323
609.415	324
609.416	325
609.442	326
609.443	327
609.591	328
609.592	329
609.652	330
609.653	331
609.664	332
609.704	333
609.736	334
609.74	335
609.741	336
609.854	337
609.885	338
609.886	339
609.903	340
609.904	341
609.933	342
609.983	343
610.166	344
610.166	345
610.333	346
610.334	347
610.494	348
610.495	349
610.515	350
610.516	351
610.588	352
610.589	353
610.674	354
610.675	355
610.797	356
610.837	357
610.838	358
610.902	359
610.984	360
610.985	361
611.053	362
611.302	363
611.351	364
611.395	365
611.453	366
611.454	367
611.605	368
611.606	369
611.678	370
611.679	371
611.774	372
611.775	373
611.779	374
611.78	375
611.814	376
611.881	377
611.953	378
611.954	379
611.961	380
611.962	381
611.978	382
611.983	383
612.004	384
612.005	385
612.062	386
612.063	387
612.072	388
612.073	389
612.137	390
612.143	391
612.144	392
612.217	393
612.274	394
612.32	395
612.451	396
612.452	397
612.471	398
612.504	399
612.505	400
612.517	401
612.518	402
612.575	403
612.576	404
612.687	405
612.688	406
612.738	407
612.952	408
612.953	409
612.977	410
612.977	411
612.986	412
613.026	413
613.027	414
613.062	415
613.071	416
613.087	417
613.088	418
613.096	419
613.118	420
613.149	421
613.15	422
613.189	423
613.189	424
613.207	425
613.248	426
613.266	427
613.353	428
613.354	429
613.397	430
613.444	431
613.447	432
613.495	433
613.496	434
613.512	435
613.558	436
613.569	437
613.57	438
613.586	439
613.587	440
613.608	441
613.632	442
613.633	443
613.638	444
613.701	445
613.705	446
613.723	447
613.81	448
613.855	449
613.867	450
613.924	451
613.925	452
613.944	453
613.945	454
613.971	455
613.972	456
613.998	457
614.017	458
614.019	459
614.123	460
614.152	461
614.153	462
614.213	463
614.213	464
614.245	465
614.249	466
614.25	467
614.265	468
614.405	469
614.466	470
614.467	471
614.519	472
614.524	473
614.525	474
614.539	475
614.54	476
614.629	477
614.635	478
614.635	479
614.689	480
614.695	481
614.696	482
614.756	483
614.774	484
614.778	485
614.804	486
614.853	487
615.054	488
615.09	489
615.107	490
615.127	491
615.128	492
615.216	493
615.343	494
615.344	495
615.372	496
615.373	497
615.482	498
615.482	499
615.536	500
615.574	501
615.575	502
615.591	503
615.592	504
615.694	505
615.695	506
615.752	507
615.752	508
615.811	509
615.811	510
615.814	511
615.884	512
615.89	513
615.891	514
616.011	515
616.012	516
616.114	517
616.156	518
616.366	519
616.409	520
616.425	521
616.535	522
616.618	523
616.619	524
616.637	525
616.664	526
616.665	527
616.696	528
616.916	529
616.94	530
616.941	531
617.032	532
617.033	533
617.038	534
617.039	535
617.059	536
617.067	537
617.079	538
617.135	539
617.209	540
617.247	541
617.248	542
617.386	543
617.503	544
617.517	545
617.518	546
617.541	547
617.55	548
617.577	549
