# Supplementary material for: A temperature- and stress-controlled failure criterion for ice-filledpermafrost rock joints
Source: Copernicus journal article supplement (doi:10.5194/tc-2018-57), 2018-03-28
Supplement: Supplementary file 1 [file tc-2018-57-supplement.zip › Suppl. material_Mamot et al/data_timeseries_acoustic_exp6b_WSK_spec1_Fig. S3.xlsx]

## Sheet: Sheet1
time_sec	hits_cumulative
21.2966	1
133.406	2
133.415	3
133.745	4
133.749	5
133.764	6
133.818	7
133.82	8
133.824	9
134.212	10
134.215	11
134.215	12
134.307	13
134.319	14
134.505	15
134.514	16
134.561	17
134.568	18
134.571	19
134.575	20
134.831	21
134.939	22
134.942	23
134.942	24
138.227	25
138.375	26
138.751	27
138.781	28
138.783	29
138.795	30
138.796	31
138.827	32
138.831	33
138.936	34
138.974	35
138.975	36
138.979	37
139.281	38
139.287	39
139.301	40
139.591	41
139.711	42
139.715	43
139.746	44
139.748	45
139.751	46
140.07	47
140.179	48
140.18	49
140.186	50
140.187	51
140.215	52
140.569	53
140.711	54
140.857	55
140.861	56
141.04	57
141.064	58
141.07	59
141.088	60
141.107	61
141.108	62
141.122	63
141.141	64
141.172	65
141.18	66
141.226	67
141.233	68
141.613	69
142.108	70
142.112	71
142.161	72
142.167	73
142.189	74
142.252	75
142.253	76
142.258	77
142.447	78
142.452	79
142.469	80
142.486	81
142.693	82
142.783	83
142.785	84
142.788	85
142.845	86
142.849	87
142.924	88
142.935	89
143.1	90
143.104	91
143.124	92
143.154	93
143.161	94
143.178	95
143.194	96
143.211	97
143.23	98
143.246	99
143.262	100
143.28	101
143.296	102
143.314	103
143.449	104
143.483	105
143.488	106
143.494	107
143.516	108
143.533	109
143.552	110
143.569	111
143.639	112
143.801	113
143.847	114
143.851	115
143.875	116
144.114	117
144.259	118
144.354	119
144.499	120
146.651	121
146.957	122
147.087	123
147.104	124
147.109	125
147.191	126
147.261	127
147.38	128
147.601	129
147.891	130
166.739	131
166.742	132
166.743	133
167.124	134
168.357	135
168.93	136
168.963	137
169.01	138
169.101	139
169.358	140
169.385	141
169.386	142
169.395	143
169.443	144
169.474	145
169.926	146
170.592	147
172.527	148
172.531	149
172.554	150
172.655	151
172.662	152
172.675	153
172.695	154
172.819	155
172.897	156
172.898	157
172.907	158
172.932	159
172.948	160
172.949	161
172.963	162
173.428	163
173.435	164
174.064	165
174.102	166
174.108	167
174.135	168
174.191	169
174.197	170
174.263	171
174.639	172
174.642	173
174.659	174
174.675	175
174.71	176
174.713	177
174.729	178
174.882	179
174.89	180
174.906	181
174.907	182
174.928	183
175.116	184
175.12	185
175.144	186
175.152	187
175.224	188
175.227	189
175.247	190
175.263	191
175.278	192
175.544	193
175.548	194
175.564	195
175.71	196
175.724	197
175.725	198
175.745	199
175.751	200
175.773	201
176.116	202
177.671	203
177.677	204
177.701	205
177.713	206
196.165	207
215.188	208
218.285	209
218.475	210
223.431	211
223.435	212
223.451	213
223.469	214
223.49	215
223.504	216
223.519	217
223.536	218
223.553	219
223.571	220
223.592	221
223.607	222
223.664	223
223.67	224
223.685	225
223.706	226
223.719	227
224.388	228
224.392	229
224.428	230
224.437	231
224.455	232
224.687	233
224.689	234
225.083	235
225.087	236
225.21	237
225.217	238
226.095	239
229.929	240
229.968	241
255.96	242
259.866	243
262.398	244
265.942	245
265.946	246
265.961	247
265.992	248
265.995	249
266.02	250
266.033	251
266.225	252
266.227	253
266.244	254
266.271	255
266.309	256
266.313	257
266.339	258
266.348	259
266.373	260
266.381	261
267.389	262
267.392	263
267.464	264
267.544	265
267.58	266
267.58	267
267.585	268
267.586	269
267.602	270
268.307	271
268.311	272
268.86	273
268.863	274
271.201	275
287.024	276
287.219	277
287.859	278
287.861	279
288.758	280
288.861	281
405.671	282
456.177	283
457.539	284
457.54	285
459.057	286
459.058	287
601.187	288
601.189	289
665.811	290
669.174	291
669.176	292
669.934	293
672.142	294
675.429	295
675.431	296
676.859	297
676.86	298
681.046	299
681.54	300
681.713	301
685.629	302
685.631	303
690.003	304
690.787	305
690.789	306
691.217	307
691.218	308
691.582	309
694.316	310
695.121	311
695.123	312
695.279	313
695.281	314
695.351	315
695.353	316
695.839	317
695.846	318
695.848	319
696.037	320
696.038	321
696.761	322
696.762	323
696.931	324
696.933	325
697.383	326
697.428	327
697.43	328
698.905	329
698.906	330
699.45	331
699.451	332
699.501	333
699.503	334
699.752	335
700.766	336
700.767	337
700.812	338
700.813	339
700.89	340
700.892	341
700.966	342
700.968	343
701.123	344
701.125	345
701.57	346
701.673	347
701.783	348
701.785	349
702.082	350
702.083	351
702.183	352
702.184	353
702.307	354
702.309	355
702.419	356
703.041	357
703.043	358
703.379	359
703.38	360
703.438	361
703.48	362
703.76	363
703.761	364
704.265	365
704.293	366
704.336	367
704.338	368
704.36	369
704.362	370
704.799	371
704.95	372
704.952	373
705.197	374
705.199	375
705.294	376
705.296	377
705.331	378
705.332	379
705.374	380
705.376	381
705.494	382
705.496	383
705.526	384
705.719	385
705.72	386
705.778	387
705.779	388
705.786	389
705.808	390
705.809	391
705.87	392
705.871	393
705.976	394
705.986	395
705.988	396
705.996	397
705.999	398
706.068	399
706.07	400
706.118	401
706.126	402
706.244	403
706.247	404
706.268	405
706.27	406
706.276	407
706.432	408
706.434	409
706.44	410
706.442	411
706.485	412
706.507	413
706.508	414
706.515	415
706.517	416
706.703	417
706.728	418
706.729	419
706.734	420
706.834	421
706.836	422
706.886	423
706.906	424
706.908	425
706.915	426
706.917	427
706.986	428
706.988	429
707.035	430
707.037	431
707.071	432
707.073	433
707.098	434
707.099	435
707.169	436
707.17	437
707.177	438
707.178	439
707.223	440
707.225	441
707.234	442
707.235	443
707.259	444
707.28	445
707.281	446
707.355	447
707.359	448
707.365	449
707.463	450
707.464	451
707.497	452
707.498	453
707.504	454
707.506	455
707.524	456
707.539	457
707.542	458
707.622	459
707.624	460
707.637	461
707.664	462
707.666	463
707.678	464
707.7	465
707.702	466
707.708	467
707.708	468
707.736	469
707.753	470
707.768	471
707.769	472
707.778	473
707.791	474
707.819	475
707.821	476
707.851	477
707.853	478
707.918	479
707.936	480
707.938	481
707.942	482
707.943	483
707.961	484
707.994	485
707.996	486
708.003	487
708.021	488
708.04	489
708.042	490
708.065	491
708.117	492
708.121	493
708.123	494
708.15	495
708.151	496
708.16	497
708.183	498
708.185	499
708.199	500
708.202	501
708.209	502
708.225	503
708.231	504
708.247	505
708.254	506
708.286	507
708.288	508
708.308	509
708.315	510
708.316	511
708.322	512
708.327	513
708.344	514
708.37	515
708.371	516
708.38	517
708.4	518
708.418	519
708.423	520
708.444	521
708.446	522
708.461	523
708.466	524
708.485	525
708.492	526
708.507	527
708.51	528
708.528	529
708.533	530
708.55	531
708.555	532
708.576	533
708.577	534
708.594	535
708.656	536
708.658	537
854.622	538
1388.64	539
1389.31	540
1390.42	541
1390.42	542
1390.47	543
1391.05	544
1391.05	545
1763.12	546
1763.12	547
1763.4	548
1763.4	549
