# Supplementary material for: A temperature- and stress-controlled failure criterion for ice-filledpermafrost rock joints
Source: Copernicus journal article supplement (doi:10.5194/tc-2018-57), 2018-03-28
Supplement: Supplementary file 1 [file tc-2018-57-supplement.zip › Suppl. material_Mamot et al/data_timeseries_acoustic_exp7b_WSK_spec2_Fig. S3.xlsx]

## Sheet: Sheet1
time_sec	hits_cumulative
153.644	1
354.3	2
354.302	3
356.553	4
356.554	5
359.794	6
369.316	7
369.318	8
371.037	9
371.039	10
371.62	11
371.621	12
374.549	13
374.55	14
376.059	15
376.061	16
376.811	17
376.813	18
377.853	19
377.854	20
377.918	21
377.92	22
378.149	23
378.15	24
378.58	25
378.581	26
378.922	27
378.923	28
379.073	29
379.074	30
381.578	31
381.58	32
382.513	33
382.892	34
382.893	35
383.649	36
383.651	37
383.657	38
383.658	39
383.757	40
383.758	41
384.277	42
384.279	43
384.432	44
384.434	45
385.092	46
385.093	47
385.157	48
385.159	49
385.37	50
385.371	51
385.651	52
385.652	53
386.627	54
386.628	55
386.851	56
386.853	57
387.027	58
387.029	59
387.514	60
387.553	61
387.555	62
388.006	63
388.007	64
388.136	65
388.137	66
388.242	67
388.771	68
388.773	69
388.873	70
388.875	71
389.313	72
389.315	73
389.483	74
389.484	75
390.011	76
390.012	77
390.26	78
390.261	79
390.307	80
390.309	81
390.687	82
390.689	83
390.93	84
391.115	85
391.117	86
391.373	87
391.374	88
391.399	89
391.4	90
391.662	91
391.664	92
391.746	93
391.747	94
391.807	95
391.809	96
391.829	97
391.831	98
391.877	99
391.879	100
392.003	101
392.004	102
392.139	103
392.14	104
392.318	105
392.319	106
392.357	107
392.36	108
392.362	109
392.709	110
392.71	111
392.74	112
392.741	113
392.761	114
392.762	115
393.012	116
393.013	117
393.745	118
393.747	119
393.965	120
393.967	121
394.031	122
394.033	123
394.067	124
394.069	125
394.112	126
394.114	127
394.541	128
394.543	129
394.779	130
394.781	131
394.804	132
394.806	133
394.931	134
395.119	135
395.121	136
395.31	137
395.311	138
395.508	139
395.632	140
395.633	141
396.848	142
396.85	143
397.035	144
397.037	145
397.079	146
397.08	147
397.178	148
397.18	149
397.334	150
397.335	151
397.352	152
397.354	153
397.363	154
397.364	155
397.486	156
397.488	157
397.621	158
397.75	159
397.82	160
397.822	161
397.877	162
397.879	163
398.002	164
398.004	165
398.041	166
398.042	167
398.161	168
398.228	169
398.231	170
398.233	171
398.326	172
398.328	173
398.376	174
398.378	175
398.671	176
398.672	177
398.912	178
398.914	179
399.041	180
399.043	181
399.062	182
399.089	183
399.211	184
399.258	185
399.259	186
399.286	187
399.288	188
399.31	189
399.311	190
399.322	191
399.324	192
399.356	193
399.357	194
399.362	195
399.542	196
399.713	197
399.714	198
399.802	199
399.803	200
399.809	201
399.812	202
399.961	203
399.963	204
400.179	205
400.25	206
400.251	207
400.437	208
400.438	209
400.524	210
400.526	211
400.564	212
400.565	213
400.643	214
400.663	215
400.783	216
400.905	217
400.907	218
400.965	219
400.966	220
401.086	221
401.088	222
401.231	223
401.52	224
401.564	225
401.566	226
401.572	227
401.6	228
401.602	229
401.725	230
401.726	231
401.863	232
401.864	233
401.917	234
401.919	235
402.181	236
402.183	237
402.218	238
402.22	239
402.3	240
402.301	241
402.305	242
402.307	243
402.376	244
402.378	245
402.49	246
402.491	247
402.548	248
402.549	249
402.795	250
402.797	251
402.858	252
402.859	253
403.13	254
403.131	255
403.146	256
403.148	257
403.164	258
403.196	259
403.198	260
403.205	261
403.207	262
403.276	263
403.278	264
403.341	265
403.424	266
403.425	267
403.43	268
403.431	269
403.557	270
403.584	271
403.585	272
403.634	273
403.654	274
403.689	275
403.691	276
403.731	277
403.732	278
403.817	279
403.818	280
403.869	281
403.87	282
403.909	283
403.923	284
403.978	285
404.162	286
404.33	287
404.332	288
404.353	289
404.408	290
404.409	291
404.583	292
404.585	293
404.868	294
404.869	295
405.061	296
405.062	297
405.09	298
405.091	299
405.143	300
405.144	301
405.196	302
405.198	303
405.332	304
405.334	305
405.41	306
405.412	307
405.484	308
405.485	309
405.584	310
405.585	311
405.715	312
405.754	313
405.757	314
405.759	315
405.795	316
405.797	317
405.844	318
405.873	319
405.875	320
405.959	321
405.96	322
406.078	323
406.095	324
406.097	325
406.136	326
406.138	327
406.16	328
406.161	329
406.278	330
406.28	331
406.287	332
406.289	333
406.401	334
406.402	335
406.411	336
406.413	337
406.431	338
406.433	339
406.539	340
406.541	341
406.583	342
406.585	343
406.681	344
406.682	345
406.684	346
406.687	347
406.709	348
406.784	349
406.785	350
406.803	351
406.805	352
406.836	353
406.837	354
406.997	355
406.998	356
407.024	357
407.044	358
407.046	359
407.077	360
407.079	361
407.157	362
407.158	363
407.164	364
407.281	365
407.283	366
407.294	367
407.296	368
407.33	369
407.332	370
407.402	371
407.426	372
407.427	373
407.439	374
407.44	375
407.544	376
407.546	377
407.548	378
407.564	379
407.675	380
407.677	381
407.694	382
407.695	383
407.724	384
407.726	385
407.752	386
407.76	387
407.762	388
407.78	389
407.802	390
407.803	391
407.842	392
407.843	393
407.866	394
407.868	395
407.954	396
407.955	397
407.978	398
407.98	399
408.011	400
408.012	401
408.048	402
408.05	403
408.151	404
408.153	405
408.192	406
408.193	407
408.211	408
408.212	409
408.232	410
408.234	411
408.242	412
408.329	413
408.331	414
408.352	415
408.353	416
408.392	417
408.393	418
408.42	419
408.422	420
408.439	421
408.445	422
408.486	423
408.487	424
408.494	425
408.517	426
408.55	427
408.551	428
408.563	429
408.564	430
408.576	431
408.593	432
408.607	433
408.614	434
408.617	435
408.633	436
408.67	437
408.68	438
408.681	439
408.714	440
408.72	441
408.724	442
408.741	443
408.756	444
408.825	445
408.826	446
447.543	447
447.544	448
449.051	449
459.528	450
469.723	451
472.768	452
472.769	453
479.372	454
479.374	455
497.634	456
497.636	457
513.142	458
513.144	459
522.553	460
524.957	461
524.959	462
528.437	463
528.439	464
551.554	465
551.555	466
553.244	467
553.246	468
571.326	469
571.327	470
576.142	471
581.157	472
583.155	473
585.046	474
585.048	475
585.154	476
585.155	477
587.621	478
593.434	479
593.436	480
597.536	481
597.537	482
597.857	483
597.936	484
597.937	485
598.22	486
598.717	487
598.718	488
598.831	489
598.833	490
601.379	491
601.38	492
602.284	493
602.286	494
603.487	495
603.488	496
604.172	497
604.173	498
606.734	499
607.557	500
607.559	501
607.945	502
607.947	503
609.485	504
609.486	505
609.712	506
609.713	507
610.606	508
611.369	509
611.37	510
612.236	511
612.237	512
614.598	513
614.6	514
615.758	515
615.76	516
616.334	517
616.336	518
616.764	519
616.766	520
617.991	521
618.308	522
618.309	523
620.331	524
620.332	525
621.357	526
621.359	527
621.576	528
621.578	529
621.599	530
622.14	531
622.141	532
623.348	533
623.349	534
624.047	535
624.049	536
625.129	537
625.131	538
625.135	539
626.326	540
626.327	541
626.531	542
626.758	543
626.76	544
631.704	545
631.705	546
634.176	547
634.178	548
640.08	549
640.082	550
640.191	551
641.849	552
641.851	553
643.443	554
643.705	555
643.707	556
647.264	557
647.266	558
647.817	559
650.737	560
650.738	561
656.367	562
664.976	563
664.978	564
665.612	565
665.614	566
665.952	567
666.75	568
671.527	569
671.528	570
677.965	571
678.576	572
678.577	573
679.06	574
679.062	575
679.296	576
679.298	577
679.55	578
679.551	579
680.134	580
680.136	581
681.896	582
681.898	583
686.698	584
686.7	585
691.261	586
691.262	587
692.57	588
693.661	589
693.663	590
698.381	591
698.382	592
699.284	593
699.285	594
700.163	595
700.235	596
700.236	597
700.807	598
700.808	599
701.792	600
702.04	601
702.473	602
702.475	603
703.862	604
703.864	605
704.09	606
704.092	607
704.28	608
707.108	609
711.298	610
711.299	611
724.678	612
724.68	613
725.124	614
725.126	615
726.997	616
727.347	617
727.59	618
737.463	619
737.464	620
741.552	621
741.554	622
756.09	623
756.092	624
758.593	625
758.594	626
771.338	627
771.34	628
800.208	629
800.209	630
803.533	631
803.534	632
829.365	633
829.367	634
831.609	635
837.033	636
837.672	637
837.673	638
842.208	639
842.209	640
845.716	641
845.718	642
846.137	643
846.139	644
849.125	645
849.127	646
858.702	647
858.703	648
861.964	649
861.966	650
863.824	651
863.825	652
888.363	653
888.365	654
890.646	655
890.647	656
896.756	657
896.757	658
899.132	659
899.133	660
906.175	661
906.177	662
916.326	663
916.328	664
916.582	665
916.583	666
925.893	667
925.894	668
925.908	669
925.91	670
932.911	671
932.912	672
942.078	673
945.325	674
945.326	675
945.699	676
945.701	677
946.273	678
946.275	679
947.207	680
947.209	681
956.246	682
956.568	683
956.569	684
969.987	685
969.988	686
974.766	687
980.928	688
980.929	689
984.347	690
984.349	691
986.226	692
986.227	693
994.59	694
994.826	695
994.827	696
1001.82	697
1001.82	698
1002.04	699
1002.05	700
1002.27	701
1002.27	702
1002.28	703
1002.5	704
1002.5	705
1003.43	706
1003.66	707
1003.66	708
1004.13	709
1004.83	710
1004.83	711
1005.99	712
1022.18	713
1039.07	714
1039.07	715
1048.91	716
1048.92	717
1057.79	718
1057.79	719
1093.2	720
1093.2	721
1103.55	722
1112.83	723
1112.83	724
1120.5	725
1120.5	726
1128.62	727
1128.62	728
1151.1	729
1151.1	730
1160.85	731
1160.85	732
1161.47	733
1161.81	734
1161.81	735
1186.76	736
1187.23	737
1196.04	738
1207.16	739
1207.16	740
1251.53	741
1251.54	742
1251.58	743
1251.59	744
1251.59	745
1251.6	746
1251.6	747
1286.75	748
1336.36	749
1336.37	750
1349.8	751
1349.8	752
1350.12	753
1350.12	754
1350.56	755
1350.56	756
1351.25	757
1385.1	758
1389.38	759
1389.38	760
1395.9	761
1395.9	762
1396.29	763
1413.1	764
1413.1	765
1413.96	766
1421.96	767
1421.96	768
1524.9	769
1524.91	770
1528.45	771
1528.45	772
1528.46	773
1528.46	774
1531.64	775
1531.64	776
1531.98	777
1531.98	778
1536.88	779
1536.88	780
1553.97	781
1553.97	782
1557.84	783
1557.84	784
1557.85	785
1567.43	786
1567.44	787
1574.69	788
1574.7	789
1577.3	790
1577.3	791
1577.3	792
1577.3	793
1583.32	794
1583.33	795
1583.33	796
1589.72	797
1589.72	798
1596.22	799
1596.22	800
