# Supplementary material for: A temperature- and stress-controlled failure criterion for ice-filledpermafrost rock joints
Source: Copernicus journal article supplement (doi:10.5194/tc-2018-57), 2018-03-28
Supplement: Supplementary file 1 [file tc-2018-57-supplement.zip › Suppl. material_Mamot et al/data_timeseries_shearmachine_exp1b_WSK_spec4_Fig. S3.xlsx]

## Sheet: Sheet1
time_sec	shear_stress_kPa	shear_deform_mm
0.076	0	0.0198472
2.132	0	0.0198472
4.132	0	0.0198472
6.189	0	0.0313798
8.237	0	0.0198472
10.285	0	0.0313798
12.301	0	0.0313798
14.324	0	0.0198472
16.356	0	0.0313798
18.396	0	0.0313798
20.404	0	0.0313798
22.42	0	0.0198472
24.437	0	0.0198472
26.461	0	0.0313798
28.493	0	0.0313798
30.517	0	0.0198472
32.548	0	0.0198472
34.556	0	0.0198472
36.588	0	0.0198472
38.612	0	0.0198472
40.613	0	0.0198472
42.669	0	0.0198472
44.669	0	0.0826058
46.677	0	0.0198472
48.692	0	0.0313798
50.708	0	0.0198472
52.732	0	0.0198472
54.74	0	0.0313798
56.756	0	0.0198472
58.773	0	0.0313798
60.781	0	0.0198472
62.805	0	0.0198472
64.861	0	0.0198472
66.924	0	0.0198472
68.956	0	0.0198472
70.964	0	0.0313798
72.996	0	0.0198472
75.005	0	0.0198472
77.013	0	0.0198472
79.013	0	0.0710712
81.021	0	0.0198472
83.028	0	0.0313798
85.036	0	0.0198472
87.084	0	0.0198472
89.1	0	0.0198472
91.108	0	0.0198472
93.117	0	0.0198472
95.165	0	0.0313798
97.213	0	0.0198472
99.261	0	0.0198472
101.308	0	0.0313798
103.308	0	0.0198472
105.356	0	0.0198472
107.404	0	0.0313798
109.404	0	0.0313798
111.453	0	0.0198472
113.501	0	0.0198472
115.549	0	0.0313798
117.597	0	0.0198472
119.644	0	0.0198472
121.668	0	0.0198472
123.684	0	0.0313798
125.732	0	0.0198472
127.757	0	0.0313798
129.765	0	0.0710712
131.781	0	0.0198472
133.781	0	0.0198472
135.788	0	0.0313798
137.812	0	0.0313798
139.812	0	0.0313798
141.812	0	0.0198472
143.86	0	0.0198472
145.909	0	0.0198472
147.909	0	0.0198472
149.965	0	0.0313798
151.989	0	0.0313798
152.181	5.63957	0.0313798
152.893	0	0.0198472
152.965	5.63902	0.0198472
153.029	0	0.0313798
154.244	5.63902	0.0198472
156.244	5.63902	0.0198472
157.076	0	0.0198472
157.212	5.63902	0.0198472
157.276	0	0.0313798
157.532	5.63902	0.0198472
157.596	0	0.0313798
159.644	0	0.0198472
159.772	5.63957	0.0313798
159.836	0	0.0313798
160.156	5.63957	0.0313798
160.284	0	0.0826058
161.572	5.63902	0.0198472
161.644	0	0.0198472
161.708	5.63957	0.0313798
161.772	0	0.0313798
161.836	5.63902	0.0198472
161.9	0	0.0313798
163.917	0	0.0313798
165.973	0	0.0198472
168.021	0	0.0313798
170.029	0	0.0313798
172.076	0	0.0313798
174.124	0	0.0313798
176.172	0	0.0313798
178.228	0	0.0198472
180.277	0	0.0198472
182.325	0	0.0198472
184.381	0	0.0198472
186.429	0	0.0313798
188.476	0	0.0198472
190.524	0	0.0198472
192.572	0	0.0313798
194.62	0	0.0313798
196.668	0	0.0313798
198.717	0	0.0313798
200.765	0	0.0313798
202.813	0	0.0198472
204.861	0	0.0313798
206.908	0	0.0313798
208.956	0	0.0198472
211.004	0	0.0198472
213.02	0	0.0198472
215.021	0	0.0313798
217.021	0	0.0198472
219.069	0	0.0313798
221.117	0	0.0198472
223.117	0	0.0313798
225.132	0	0.0198472
227.18	0	0.0198472
229.236	0	0.0313798
231.292	0	0.0198472
233.341	0	0.0313798
235.397	0	0.0198472
237.445	0	0.0198472
239.445	0	0.0313798
241.508	0	0.0313798
243.556	0	0.0198472
245.604	0	0.0198472
247.652	0	0.0313798
249.708	0	0.0313798
251.765	0	0.0313798
253.781	0	0.0313798
255.829	0	0.0313798
257.877	0	0.0313798
259.932	0	0.0198472
261.988	0	0.0198472
264.044	0	0.0198472
266.092	0	0.0198472
268.141	0	0.0313798
270.189	0	0.0198472
272.237	0	0.0198472
274.285	0	0.0198472
276.332	0	0.0313798
278.38	0	0.0198472
280.428	0	0.0313798
282.476	0	0.0313798
284.524	0	0.0313798
286.573	0	0.0198472
288.629	0	0.0198472
290.677	0	0.0313798
292.725	0	0.0313798
294.78	0	0.0710712
296.828	0	0.0313798
298.876	0	0.0198472
300.924	0	0.0313798
302.973	0	0.0313798
305.037	0	0.0198472
307.093	0	0.0313798
309.093	0	0.0313798
311.156	0	0.0198472
313.156	0	0.0198472
315.156	0	0.0198472
317.164	0	0.0313798
319.164	0	0.0198472
321.213	0	0.0198472
323.269	0	0.0313798
325.325	0	0.0198472
327.325	0	0.0198472
329.388	0	0.0313798
331.436	0	0.0313798
333.444	0	0.0313798
335.444	0	0.0198472
337.493	0	0.0313798
339.493	0	0.0198472
340.837	5.63957	0.0313798
340.965	0	0.0313798
343.021	0	0.0710712
345.045	0	0.122298
347.06	0	0.173524
347.7	5.64704	0.173524
349.7	5.65201	0.275977
350.98	11.304	0.275977
352.988	11.314	0.378428
354.997	11.314	0.378428
357.053	11.324	0.480881
359.061	11.324	0.480881
361.077	11.334	0.583334
363.093	11.334	0.583334
365.108	11.344	0.685785
367.156	11.344	0.685785
369.204	11.354	0.788238
371.228	11.354	0.788238
373.277	11.3641	0.890691
375.277	11.3641	0.890691
377.301	11.3741	0.993142
379.309	11.3691	0.941918
381.356	11.3792	1.04437
383.356	11.3842	1.0956
385.356	11.3842	1.0956
387.356	11.3893	1.14682
389.404	11.3943	1.19805
391.453	11.3994	1.24927
393.501	11.4044	1.3005
395.557	11.4146	1.40295
397.557	11.4146	1.40295
399.62	11.4196	1.45418
401.668	11.4196	1.45418
403.724	11.4247	1.50541
405.732	11.4298	1.55663
407.765	11.44	1.65908
409.765	11.4451	1.71031
411.821	11.4451	1.71031
413.845	11.4502	1.76154
415.909	11.4553	1.81276
417.964	11.4604	1.86399
419.988	11.4655	1.91522
422.004	11.4707	1.96644
423.668	17.2131	2.01767
425.669	17.2131	2.01767
427.677	22.9612	2.06889
429.693	22.9715	2.12012
431.693	22.9818	2.17135
433.7	22.9921	2.22257
434.428	28.7397	2.22257
436.484	28.7525	2.2738
438.54	28.7654	2.32502
439.964	34.5187	2.32502
442.012	34.5342	2.37625
444.013	34.5497	2.42748
446.013	34.5497	2.42748
446.333	40.3082	2.42748
448.349	40.3263	2.4787
450.373	40.3444	2.52993
452.38	40.3625	2.58115
453.66	46.1489	2.63238
455.716	46.1489	2.63238
457.764	46.1489	2.63238
459.773	46.1696	2.68361
461.821	46.1904	2.73483
463.869	46.1904	2.73483
465.917	46.232	2.83729
467.964	46.232	2.83729
469.964	46.2528	2.88851
471.98	46.2736	2.93974
473.98	46.2736	2.93974
475.996	46.2945	2.99096
478.013	46.3153	3.04219
480.029	46.3153	3.04219
482.077	46.3362	3.09342
484.125	46.3571	3.14464
486.172	46.3571	3.14464
488.228	46.3781	3.19587
488.876	52.1755	3.19587
490.876	52.1991	3.24709
492.436	57.9992	3.24709
493.868	63.8276	3.29832
495.085	69.6303	3.29832
496.317	75.4665	3.34955
497.357	81.2718	3.34955
498.461	87.0772	3.34955
499.621	92.8819	3.34955
500.661	98.7319	3.40077
501.709	104.54	3.40077
502.757	110.397	3.452
503.676	116.208	3.452
504.468	122.018	3.452
505.244	127.828	3.452
506.084	133.699	3.50322
506.932	139.512	3.50322
507.852	145.325	3.50322
508.62	151.139	3.50322
509.484	157.093	3.60568
510.26	162.838	3.55445
511.092	168.577	3.50322
511.996	174.469	3.55445
512.973	180.285	3.55445
513.893	186.1	3.55445
514.877	192.003	3.60568
515.589	197.822	3.60568
516.373	203.732	3.6569
517.213	209.458	3.60568
517.997	215.276	3.60568
518.837	221.095	3.60568
519.709	226.913	3.60568
520.485	232.731	3.60568
521.196	238.549	3.60568
521.924	244.479	3.6569
522.636	250.413	3.70813
523.412	256.353	3.75936
524.188	262.06	3.70813
524.98	267.883	3.70813
525.636	273.707	3.70813
526.212	279.53	3.70813
526.804	285.354	3.70813
527.388	291.178	3.70813
528.036	296.866	3.6569
528.74	302.825	3.70813
529.46	308.788	3.75936
530.229	314.472	3.70813
530.885	320.441	3.75936
531.469	326.267	3.75936
532.045	332.093	3.75936
532.621	337.92	3.75936
533.333	343.745	3.75936
533.981	349.572	3.75936
534.773	355.398	3.75936
535.557	361.224	3.75936
536.285	367.384	3.86181
536.877	372.876	3.75936
537.533	378.703	3.75936
538.252	384.878	3.86181
539.028	390.709	3.86181
539.748	396.541	3.86181
540.532	402.372	3.86181
541.372	408.204	3.86181
542.092	414.036	3.86181
542.684	419.867	3.86181
543.404	425.892	3.91303
544.124	431.726	3.91303
544.908	437.56	3.91303
545.62	443.394	3.91303
546.396	449.228	3.91303
547.237	455.062	3.91303
547.941	460.897	3.91303
548.517	466.943	3.96426
549.293	472.565	3.91303
550.125	478.617	3.96426
550.893	484.453	3.96426
551.677	490.067	3.91303
552.445	496.127	3.96426
553.229	501.736	3.91303
553.813	508.031	4.01549
554.533	514.104	4.06671
555.373	519.474	3.96426
556.204	525.55	4.01549
556.972	531.389	4.01549
557.812	537.473	4.06671
558.716	543.068	4.01549
559.492	548.907	4.01549
560.404	554.747	4.01549
561.18	560.586	4.01549
561.948	566.683	4.06671
562.788	572.265	4.01549
563.628	578.104	4.01549
564.46	584.476	4.11794
565.173	590.051	4.06671
565.949	595.894	4.06671
566.725	602.01	4.11794
567.573	607.578	4.06671
568.341	613.699	4.11794
569.189	619.544	4.11794
569.909	625.389	4.11794
570.749	630.947	4.06671
571.461	637.078	4.11794
572.245	643.216	4.16916
573.02	649.063	4.16916
573.86	654.91	4.16916
574.764	660.758	4.16916
575.54	666.606	4.16916
576.38	672.453	4.16916
576.964	678.3	4.16916
577.74	684.147	4.16916
578.58	689.995	4.16916
579.428	696.16	4.22039
580.268	702.009	4.22039
581.044	707.86	4.22039
581.82	713.71	4.22039
582.541	719.56	4.22039
583.309	725.41	4.22039
584.085	731.593	4.27162
584.981	737.11	4.22039
585.957	743.299	4.27162
586.917	749.151	4.27162
587.893	755.004	4.27162
588.733	760.857	4.27162
589.773	766.71	4.27162
590.748	772.915	4.32284
591.596	778.415	4.27162
592.372	784.625	4.32284
593.212	790.481	4.32284
593.988	796.336	4.32284
594.9	802.558	4.37407
595.804	808.047	4.32284
596.964	813.902	4.32284
597.924	820.132	4.37407
598.956	825.99	4.37407
599.925	831.848	4.37407
601.277	837.324	4.32284
602.429	843.564	4.37407
603.525	849.422	4.37407
604.701	855.281	4.37407
605.941	861.138	4.37407
607.173	866.997	4.37407
608.205	872.854	4.37407
609.372	878.713	4.37407
610.532	884.571	4.37407
611.756	890.429	4.37407
612.852	896.287	4.37407
614.012	902.557	4.4253
615.356	908.417	4.4253
616.388	914.278	4.4253
617.477	920.139	4.4253
618.509	926	4.4253
619.597	931.861	4.4253
621.013	938.149	4.47652
622.357	944.013	4.47652
623.581	949.876	4.47652
624.885	955.74	4.47652
626.18	961.603	4.47652
627.308	967.908	4.52775
628.348	973.33	4.47652
629.852	979.641	4.52775
630.892	985.507	4.52775
631.988	991.373	4.52775
633.036	997.239	4.52775
634.196	1003.1	4.52775
635.541	1009.43	4.57897
636.821	1015.3	4.57897
638.109	1020.7	4.52775
639.525	1027.04	4.57897
640.749	1032.91	4.57897
641.909	1038.78	4.57897
643.188	1044.65	4.57897
644.604	1050.51	4.57897
645.892	1056.38	4.57897
646.98	1062.74	4.6302
648.068	1068.61	4.6302
649.228	1073.99	4.57897
650.772	1080.85	4.68143
652.253	1086.22	4.6302
654.181	1092.09	4.6302
655.661	1097.97	4.6302
656.813	1103.84	4.6302
658.029	1110.22	4.68143
659.453	1116.09	4.68143
660.877	1121.96	4.68143
662.82	1127.84	4.68143
664.828	1128.35	4.73265
664.892	1133.71	4.68143
666.756	1140.11	4.73265
668.428	1145.99	4.73265
669.909	1152.39	4.78388
671.325	1157.21	4.68143
672.741	1163.62	4.73265
674.221	1170.03	4.78388
675.893	1175.91	4.78388
677.508	1181.79	4.78388
679.38	1187.67	4.78388
681.1	1193.55	4.78388
682.58	1199.43	4.78388
684.02	1205.31	4.78388
685.452	1211.18	4.78388
686.997	1217.62	4.83511
688.661	1222.94	4.78388
690.717	1229.39	4.83511
692.645	1235.27	4.83511
694.325	1241.72	4.88633
695.94	1247.03	4.83511
697.484	1252.91	4.83511
698.836	1258.8	4.83511
700.188	1265.26	4.88633
701.22	1271.14	4.88633
702.06	1277.03	4.88633
703.02	1283.5	4.93756
703.924	1289.39	4.93756
704.829	1295.28	4.93756
705.861	1301.16	4.93756
706.829	1307.65	4.98878
707.989	1312.94	4.93756
709.149	1318.83	4.93756
710.245	1324.72	4.93756
711.469	1329.99	4.88633
712.621	1337.1	4.98878
713.908	1342.99	4.98878
714.868	1348.88	4.98878
715.908	1355.4	5.04001
717.068	1360.66	4.98878
718.428	1366.55	4.98878
719.588	1372.45	4.98878
721.388	1378.97	5.04001
722.997	1384.86	5.04001
724.341	1390.75	5.04001
725.693	1396.65	5.04001
727.109	1403.18	5.09124
728.549	1409.08	5.09124
730.173	1414.33	5.04001
731.98	1420.87	5.09124
733.716	1427.42	5.14246
735.34	1432.66	5.09124
736.884	1438.56	5.09124
738.5	1445.12	5.14246
740.117	1450.35	5.09124
741.925	1456.25	5.09124
743.717	1462.81	5.14246
745.765	1462.81	5.14246
746.149	1468.71	5.14246
748.196	1468.71	5.14246
749.156	1474.61	5.14246
751.212	1474.61	5.14246
751.916	1480.51	5.14246
753.972	1481.87	5.24492
754.676	1487.09	5.19369
756.684	1487.09	5.19369
756.82	1492.99	5.19369
758.493	1498.2	5.14246
760.021	1504.1	5.14246
761.565	1510.69	5.19369
763.613	1516.59	5.19369
765.341	1523.2	5.24492
766.948	1529.1	5.24492
768.428	1535	5.24492
769.652	1540.91	5.24492
771.068	1547.52	5.29614
772.604	1553.43	5.29614
774.276	1558.62	5.24492
776.069	1564.52	5.24492
778.125	1565.24	5.29614
778.189	1570.43	5.24492
779.949	1577.78	5.34737
781.573	1582.96	5.29614
783.117	1589.6	5.34737
784.804	1595.51	5.34737
786.772	1601.42	5.34737
788.78	1602.16	5.39859
789.036	1607.33	5.34737
790.644	1611.03	5.6035
790.732	1599.19	5.6035
790.796	1581.42	5.6035
790.86	1570.3	5.65472
790.932	1552.52	5.65472
790.996	1534.74	5.65472
791.068	1522.89	5.65472
791.132	1505.11	5.65472
791.196	1488.02	5.70595
791.26	1475.49	5.65472
791.324	1457.71	5.65472
791.396	1439.93	5.65472
791.46	1422.15	5.65472
791.524	1410.3	5.65472
791.588	1392.53	5.65472
791.652	1374.75	5.65472
791.724	1362.27	5.6035
791.788	1345.12	5.65472
791.853	1327.34	5.65472
791.917	1310.17	5.70595
791.981	1298.32	5.70595
792.053	1279.94	5.65472
792.117	1262.74	5.70595
792.181	1250.31	5.65472
792.245	1233.1	5.70595
792.309	1216.44	5.8084
792.381	1198.64	5.8084
792.445	1185.68	5.70595
792.509	1167.89	5.70595
792.573	1150.11	5.70595
792.637	1138.77	5.75718
792.717	1120.46	5.70595
792.781	1102.68	5.70595
792.845	1084.89	5.70595
792.909	1073.53	5.75718
792.973	1055.25	5.70595
793.045	1037.47	5.70595
793.109	1025.14	5.65472
793.173	1008.29	5.75718
793.237	990.497	5.75718
793.301	972.255	5.70595
793.373	960.841	5.75718
793.437	942.613	5.70595
793.501	924.828	5.70595
793.565	912.971	5.70595
793.629	895.599	5.75718
793.701	877.806	5.75718
793.765	859.615	5.70595
793.829	847.759	5.70595
793.893	830.357	5.75718
793.957	812.188	5.70595
794.029	800.332	5.70595
794.093	782.908	5.75718
794.157	765.114	5.75718
794.221	747.321	5.75718
794.285	735.119	5.70595
794.357	717.665	5.75718
794.421	699.872	5.75718
794.493	688.01	5.75718
794.557	669.907	5.70595
794.621	652.423	5.75718
794.693	634.63	5.75718
794.757	622.48	5.70595
794.821	604.695	5.70595
794.885	587.181	5.75718
794.949	569.387	5.75718
795.021	557.525	5.75718
795.085	539.483	5.70595
795.149	521.938	5.75718
795.213	510.076	5.75718
795.277	492.283	5.75718
795.349	474.489	5.75718
795.413	456.696	5.75718
795.477	444.834	5.75718
795.541	427.238	5.8084
795.605	409.247	5.75718
795.677	397.385	5.75718
795.741	379.591	5.75718
795.805	361.631	5.70595
795.869	344.005	5.75718
795.933	332.143	5.75718
796.005	314.494	5.8084
796.069	296.556	5.75718
796.133	284.694	5.75718
796.197	266.9	5.75718
796.269	249.222	5.8084
796.341	231.314	5.75718
796.405	219.553	5.8084
796.469	201.752	5.8084
796.533	183.865	5.75718
796.597	166.148	5.8084
796.669	154.281	5.8084
796.733	136.479	5.8084
796.797	118.677	5.8084
796.861	106.761	5.75718
796.925	88.9671	5.75718
796.997	71.1737	5.75718
797.061	53.3803	5.75718
797.125	41.5374	5.8084
797.189	23.7248	5.75718
797.253	5.93408	5.8084
797.389	0	5.8084
799.397	0	5.8084
799.461	5.93408	5.8084
801.532	5.93408	5.8084
803.532	5.93683	5.85963
805.58	5.93957	5.91086
807.636	5.93957	5.91086
809.685	5.93957	5.91086
811.733	5.94232	5.96208
813.733	5.94507	6.01331
815.789	5.94782	6.06453
817.805	5.94782	6.06453
819.868	5.94782	6.06453
821.916	5.95057	6.11576
823.964	5.95333	6.16699
826.012	5.95057	6.11576
828.061	5.95333	6.16699
829.917	11.9122	6.21821
830.045	5.95609	6.21821
832.093	5.95609	6.21821
834.093	5.95609	6.21821
836.156	5.95885	6.26944
838.156	5.96162	6.32067
840.212	5.96162	6.32067
842.26	5.96162	6.32067
844.261	5.96438	6.37189
846.317	5.96438	6.37189
848.365	5.96715	6.42312
850.413	5.96715	6.42312
852.461	5.96715	6.42312
854.508	5.96993	6.47434
856.516	5.96993	6.47434
858.54	5.96993	6.47434
860.556	5.97548	6.57679
862.565	5.9727	6.52557
864.565	5.9727	6.52557
866.565	5.97548	6.57679
868.565	5.97548	6.57679
870.581	5.97548	6.57679
872.652	5.97826	6.62802
874.676	5.97826	6.62802
876.212	11.9621	6.67925
876.276	5.98104	6.67925
876.34	11.9565	6.62802
876.54	5.97826	6.62802
878.572	5.98104	6.67925
880.573	5.98383	6.73047
882.573	5.98383	6.73047
884.621	5.98383	6.73047
885.709	11.9677	6.73047
885.837	5.98383	6.73047
885.965	11.9677	6.73047
886.029	5.98383	6.73047
887.765	11.9732	6.7817
887.901	5.98383	6.73047
889.916	5.98383	6.73047
891.964	5.9894	6.83293
894.012	5.98661	6.7817
896.06	5.9894	6.83293
898.117	5.9894	6.83293
900.133	5.9894	6.83293
902.133	5.99779	6.98661
904.189	5.99499	6.93538
906.125	11.9956	6.98661
908.188	11.9956	6.98661
910.244	12.0012	7.03783
912.308	12.0068	7.08905
914.317	12.018	7.19151
916.373	12.0124	7.14028
918.381	12.0236	7.24273
920.381	12.0293	7.29396
922.429	12.0293	7.29396
924.476	12.0405	7.39641
926.476	12.0405	7.39641
928.524	12.0518	7.49887
930.54	12.0518	7.49887
932.589	12.0631	7.60132
934.645	12.0631	7.60132
936.645	12.0631	7.60132
938.693	12.0688	7.65255
940.741	12.0745	7.70377
942.788	12.0801	7.75499
944.804	12.0745	7.70377
946.812	12.0801	7.75499
948.868	12.0801	7.75499
950.877	12.0915	7.85745
952.933	12.0915	7.85745
954.933	12.0915	7.85745
956.981	12.0915	7.85745
959.044	12.1086	8.01113
959.492	18.1451	7.90867
961.508	18.1537	7.9599
963.508	18.1537	7.9599
965.508	18.1622	8.01113
967.517	18.1622	8.01113
969.517	18.1622	8.01113
970.157	24.2279	8.06235
972.157	24.2279	8.06235
974.165	24.2279	8.06235
976.212	24.2394	8.11358
978.212	24.2394	8.11358
979.692	30.2987	8.11358
981.692	30.313	8.16481
983.74	30.313	8.16481
983.996	36.393	8.21603
986.045	36.3759	8.16481
986.173	42.4587	8.21603
988.197	42.4587	8.21603
988.325	48.5238	8.21603
989.997	54.5895	8.21603
991.421	60.6552	8.21603
992.924	66.7833	8.31849
994.436	72.8548	8.31849
995.916	78.9256	8.31849
997.652	84.997	8.31849
999.212	91.1115	8.36971
1000.97	97.1852	8.36971
1002.98	97.1852	8.36971
1003.69	103.259	8.36971
1005.69	103.259	8.36971
1006.34	109.385	8.42094
1007.97	115.462	8.42094
1009.66	121.539	8.42094
1011.46	127.616	8.42094
1013.48	127.616	8.42094
1013.62	133.693	8.42094
1015.32	139.836	8.47216
1017.01	145.985	8.52339
1018.64	151.996	8.47216
1020.46	158.151	8.52339
1022.38	164.233	8.52339
1024.12	170.316	8.52339
1025.72	176.482	8.57462
1027.45	182.567	8.57462
1029.44	188.653	8.57462
1031.5	188.742	8.62584
1031.69	194.738	8.57462
1033.74	194.831	8.62584
1034.58	200.919	8.62584
1036.6	200.824	8.57462
1036.93	206.91	8.57462
1038.93	213.096	8.62584
1040.6	219.185	8.62584
1042.6	219.185	8.62584
1043.31	225.379	8.67707
1045.32	225.379	8.67707
1046.03	231.581	8.72829
1048.08	237.563	8.67707
1050.09	237.563	8.67707
1050.28	243.654	8.67707
1052.34	243.654	8.67707
1053.82	249.745	8.67707
1055.82	249.982	8.77952
1057.84	249.863	8.72829
1058.36	255.958	8.72829
1060.41	255.958	8.72829
1062.46	255.958	8.72829
1063.48	262.052	8.72829
1065.54	262.052	8.72829
1067.6	262.176	8.77952
1069.64	262.176	8.77952
1071.65	262.176	8.77952
1073.32	256.201	8.83075
1075.37	256.079	8.77952
1077.42	250.101	8.83075
1079.47	250.101	8.83075
1081.52	250.101	8.83075
1082.48	244	8.83075
1084.54	244	8.83075
1086.59	244.116	8.88197
1087.74	238.127	8.9332
1089.76	238.127	8.9332
1091.77	238.127	8.9332
1092.04	232.021	8.9332
1094.05	232.021	8.9332
1096.1	232.021	8.9332
1098.15	232.021	8.9332
1100.2	232.021	8.9332
1100.52	225.914	8.9332
1102.53	226.022	8.98442
1104.53	226.022	8.98442
1106.59	226.022	8.98442
1108.64	226.022	8.98442
1110.69	226.129	9.03565
1112.73	226.022	8.98442
1114.73	226.129	9.03565
1116.79	226.129	9.03565
1118.8	226.129	9.03565
1120.81	226.129	9.03565
1122.82	226.237	9.08688
1124.83	226.344	9.1381
1126.88	226.344	9.1381
1128.89	226.237	9.08688
1130.9	226.237	9.08688
1132.96	226.344	9.1381
1134.04	220.227	9.1381
1136.06	220.332	9.18933
1138.06	220.332	9.18933
1140.06	220.437	9.24056
1142.12	220.227	9.1381
1144.12	220.332	9.18933
1146.17	220.437	9.24056
1148.21	220.332	9.18933
1150.26	220.437	9.24056
1152.31	220.437	9.24056
1154.36	220.437	9.24056
1156.4	220.437	9.24056
1158.45	220.437	9.24056
1160.45	220.542	9.29178
1162.47	220.542	9.29178
1164.53	220.542	9.29178
1166.54	220.647	9.34301
1167.32	226.668	9.29178
1169.33	226.776	9.34301
1171.35	226.776	9.34301
1173.36	226.884	9.39423
1175.37	226.884	9.39423
1177.42	226.776	9.34301
1178.45	220.752	9.39423
1180.45	220.752	9.39423
1182.46	220.857	9.44546
1184.01	226.992	9.44546
1186.06	226.992	9.44546
1187.08	233.238	9.49669
1188.79	239.491	9.54791
1190.46	245.631	9.54791
1192.51	245.514	9.49669
1194.56	245.866	9.65036
1195.78	239.72	9.65036
1197.83	239.72	9.65036
1198.66	233.684	9.70159
1200.72	233.796	9.75282
1201.68	227.535	9.70159
1203.68	227.643	9.75282
1205.73	227.752	9.80404
1205.8	221.491	9.75282
1207.8	221.703	9.85527
1209.84	221.809	9.9065
1211.26	215.648	9.9065
1213.26	215.751	9.95772
1215.32	215.855	10.0089
1217.37	215.958	10.0602
1219.44	215.855	10.0089
1221.44	216.062	10.1114
1223.49	216.165	10.1626
1225.52	216.165	10.1626
1227.52	216.165	10.1626
1228.04	210.091	10.2139
1230.06	210.091	10.2139
1232.07	210.191	10.2651
1234.08	210.191	10.2651
1236.08	210.394	10.3675
1238.13	210.394	10.3675
1240.17	210.495	10.4188
1242.23	210.596	10.47
1244.28	210.596	10.47
1246.33	210.596	10.47
1248.36	210.698	10.5212
1250.37	210.596	10.47
1252.42	216.999	10.5724
1253.07	210.799	10.5724
1255.08	210.901	10.6237
1257.13	211.002	10.6749
1259.18	211.002	10.6749
1261.24	211.104	10.7261
1263.29	211.206	10.7773
1265.29	211.206	10.7773
1267.34	211.206	10.7773
1268.05	205.093	10.8286
1270.1	205.39	10.9822
1272.15	205.192	10.8798
1274.2	205.291	10.931
1276.2	205.39	10.9822
1278.22	205.39	10.9822
1280.22	205.39	10.9822
1281.38	199.262	11.0335
1283.4	199.262	11.0335
1285.4	199.359	11.0847
1287.41	199.455	11.1359
1289.42	199.455	11.1359
1291.44	199.552	11.1871
1293.47	199.552	11.1871
1295.48	199.649	11.2384
1297.53	199.552	11.1871
1299.56	199.649	11.2384
1301.57	199.746	11.2896
1303.59	199.746	11.2896
1305.59	199.842	11.3408
1307.61	199.939	11.3921
1309.63	199.939	11.3921
1311.63	200.036	11.4433
1313.68	200.036	11.4433
1315.72	200.134	11.4945
1317.77	200.134	11.4945
1319.8	200.231	11.5457
1321.84	200.231	11.5457
1323.89	200.231	11.5457
1325.95	200.328	11.597
1328	200.328	11.597
1328.32	194.068	11.597
1330.32	194.163	11.6482
1332.37	194.163	11.6482
1334.43	194.257	11.6994
1335.84	200.523	11.6994
1337.89	200.523	11.6994
1339.9	200.621	11.7506
1341.96	200.719	11.8019
1344.01	200.523	11.6994
1346.07	200.621	11.7506
1348.12	200.621	11.7506
1350.13	200.719	11.8019
1350.39	194.541	11.8531
1352.41	194.446	11.8019
1354.45	194.352	11.7506
1355.95	188.174	11.8019
1357.96	188.174	11.8019
1358.03	194.541	11.8531
1360.04	194.541	11.8531
1362.04	194.541	11.8531
1364.04	194.636	11.9043
1366.1	194.636	11.9043
1368.11	194.636	11.9043
1370.11	194.636	11.9043
1372.11	194.636	11.9043
1372.3	200.914	11.9043
1374.3	200.914	11.9043
1376.35	201.012	11.9555
1378.4	201.012	11.9555
1380.28	194.731	11.9555
1380.4	201.012	11.9555
1380.8	194.731	11.9555
1381.84	201.11	12.0068
1383.76	207.395	12.0068
1385.05	213.68	12.0068
1386.15	219.964	12.0068
1387.31	226.47	12.1092
1388.79	232.761	12.1092
1390.79	232.875	12.1604
1392.84	232.988	12.2117
1393.24	226.581	12.1604
1395.24	226.692	12.2117
1396.21	220.502	12.2629
1397.83	214.203	12.2629
1399.58	207.902	12.2629
1401.58	208.004	12.3141
1402.28	201.701	12.3141
1404.34	201.701	12.3141
1406.39	201.8	12.3654
1406.77	195.398	12.3141
1408.82	195.398	12.3141
1410.82	195.494	12.3654
1410.95	189.187	12.3654
1412.95	189.28	12.4166
1415	189.187	12.3654
1417.04	189.187	12.3654
1419.1	189.28	12.4166
1421.16	189.373	12.4678
1422.06	195.781	12.519
1424.07	195.781	12.519
1426.09	195.685	12.4678
1428.09	195.781	12.519
1430.09	195.781	12.519
1432.15	195.973	12.6215
1433.81	189.651	12.6215
1435.87	189.651	12.6215
1436.96	195.877	12.5703
1439.01	195.973	12.6215
1441.01	195.973	12.6215
1443.01	195.973	12.6215
1445.06	196.07	12.6727
1446.53	202.394	12.6727
1448.58	202.394	12.6727
1450.64	202.493	12.7239
1452.36	196.166	12.7239
1454.42	196.166	12.7239
1455.57	189.838	12.7239
1457.63	189.838	12.7239
1459.68	189.931	12.7752
1460.7	196.262	12.7752
1462.75	196.359	12.8264
1463.9	202.593	12.7752
1465.95	202.692	12.8264
1468	202.692	12.8264
1470.04	202.792	12.8776
1472.09	202.792	12.8776
1474.14	202.892	12.9288
1476.19	202.792	12.8776
1478.2	196.455	12.8776
1480.22	196.552	12.9288
1482.24	196.746	13.0313
1484.25	196.746	13.0313
1484.64	202.992	12.9801
1486.65	202.992	12.9801
1488.67	203.092	13.0313
1490.69	203.092	13.0313
1492.71	203.092	13.0313
1494.72	203.192	13.0825
1496.72	203.192	13.0825
1497.05	196.939	13.1337
1499.08	196.939	13.1337
1501.08	196.939	13.1337
1503.08	196.939	13.1337
1505.13	197.037	13.185
1507.18	197.037	13.185
1509.23	197.231	13.2874
1511.28	197.134	13.2362
1513.32	197.134	13.2362
1515.37	197.231	13.2874
1517.42	197.231	13.2874
1519.47	197.329	13.3386
1521.52	197.231	13.2874
1523.56	197.329	13.3386
1524.27	190.963	13.3386
1526.32	190.963	13.3386
1528.37	190.963	13.3386
1529.33	184.597	13.3386
1531.33	184.78	13.4411
1533.33	184.597	13.3386
1535.38	184.688	13.3899
1537.39	184.688	13.3899
1539.4	184.78	13.4411
1539.97	190.963	13.3386
1542	191.152	13.4411
1544.04	191.152	13.4411
1546.09	191.246	13.4923
1548.15	191.246	13.4923
1550.16	191.246	13.4923
1550.79	197.621	13.4923
1551.25	191.246	13.4923
1553.28	191.341	13.5436
1555.31	191.246	13.4923
1555.84	197.621	13.4923
1557.86	197.719	13.5436
1559.92	197.817	13.5948
1561.92	197.915	13.646
1563.93	197.915	13.646
1564.06	204.299	13.646
1565.17	210.788	13.6972
1566.34	217.176	13.6972
1567.45	223.563	13.6972
1568.61	230.178	13.7997
1570.61	230.293	13.8509
1572.28	223.895	13.8509
1574.09	217.499	13.8509
1575.9	211.416	14.0046
1577.96	211.416	14.0046
1579.43	205.111	14.0558
1581.48	205.213	14.107
1583.53	205.315	14.1583
1585.53	205.52	14.2607
1587.55	205.622	14.3119
1589.6	205.622	14.3119
1591.64	205.827	14.4144
1593.69	205.93	14.4656
1595.73	206.136	14.5681
1596.37	199.595	14.5169
1596.44	206.033	14.5169
1596.5	199.694	14.5681
1598.5	199.794	14.6193
1600.04	206.239	14.6193
1600.17	199.894	14.6705
1600.23	206.239	14.6193
1601.45	199.894	14.6705
1601.52	206.342	14.6705
1603.56	206.548	14.773
1605.59	206.755	14.8754
1607.64	206.755	14.8754
1609.68	206.962	14.9779
1611.68	206.859	14.9267
1613.73	207.066	15.0291
1615.73	207.274	15.1316
1617.78	207.378	15.1828
1619.7	201.201	15.3365
1621.7	201.1	15.2852
1623.71	201.302	15.3877
1625.76	201.404	15.4389
1625.95	195.005	15.4901
1627.98	195.005	15.4901
1630.03	195.103	15.5414
1632.08	195.201	15.5926
1634.13	195.3	15.6438
1636.13	195.398	15.6951
1637.48	202.116	15.7975
1639.49	202.116	15.7975
1639.63	195.694	15.8487
1641.66	195.793	15.9
1643.68	195.892	15.9512
1645.68	195.991	16.0024
1647.71	196.19	16.1049
1649.72	196.289	16.1561
1651.72	196.289	16.1561
1653.74	196.489	16.2585
1655.74	196.489	16.2585
1657.74	196.688	16.361
1659.79	196.788	16.4122
1661.84	196.888	16.4634
1663.9	196.988	16.5147
1665.91	197.188	16.6171
1667.65	190.615	16.6171
1669.65	190.809	16.7196
1671.66	190.809	16.7196
1673.72	190.907	16.7708
1675.77	190.907	16.7708
1677.18	197.691	16.8733
1679.24	197.792	16.9245
1681.28	197.893	16.9757
1682.05	191.296	16.9757
1684.05	191.296	16.9757
1686.05	191.296	16.9757
1688.1	191.492	17.0782
1690.15	191.59	17.1294
1692.2	191.59	17.1294
1694.24	191.688	17.1806
1696.27	191.786	17.2318
1698.3	191.786	17.2318
1699	198.399	17.2318
1701.01	198.501	17.2831
1703.01	198.704	17.3855
1703.2	205.328	17.3855
1705.2	205.433	17.4367
1707.23	205.433	17.4367
1709.28	199.113	17.5904
1711.33	199.113	17.5904
1713.38	199.215	17.6416
1715.39	199.317	17.6929
1717.44	199.42	17.7441
1719.45	199.42	17.7441
1721.5	199.522	17.7953
1722.59	192.97	17.8465
1722.65	199.522	17.7953
1723.1	192.871	17.7953
1724.32	199.625	17.8465
1726.38	199.831	17.949
1728.43	199.831	17.949
1728.62	193.169	17.949
1728.76	199.933	18.0002
1729.21	193.169	17.949
1729.41	199.831	17.949
1729.48	193.269	18.0002
1729.92	199.831	17.949
1731.08	193.269	18.0002
1733.14	193.368	18.0515
1735.19	193.468	18.1027
1737.24	193.568	18.1539
1739.29	193.568	18.1539
1741.33	193.668	18.2051
1741.91	187.087	18.2564
1743.96	187.087	18.2564
1744.86	193.868	18.3076
1746.92	193.768	18.2564
1748.96	193.968	18.3588
1749.93	200.761	18.41
1751.98	200.865	18.4613
1754.07	200.865	18.4613
1756.07	200.969	18.5125
1758.12	201.073	18.5637
1760.18	201.177	18.6149
1762.2	201.282	18.6662
1764.01	194.774	18.7686
1766.07	194.875	18.8198
1768.07	194.774	18.7686
1770.07	194.875	18.8198
1772.08	195.078	18.9223
1774.08	195.179	18.9735
1775.84	188.449	18.9735
1777.89	188.547	19.0248
1779.94	188.645	19.076
1781.96	195.484	19.1272
1783.96	195.688	19.2297
1785.96	195.586	19.1784
1787.63	188.842	19.1784
1789.69	189.039	19.2809
1790.45	195.892	19.3321
1792.51	195.994	19.3833
1794.56	195.994	19.3833
1796.6	195.994	19.3833
1796.86	189.236	19.3833
1798.9	189.434	19.4858
