# Supplementary material for: A temperature- and stress-controlled failure criterion for ice-filledpermafrost rock joints
Source: Copernicus journal article supplement (doi:10.5194/tc-2018-57), 2018-03-28
Supplement: Supplementary file 1 [file tc-2018-57-supplement.zip › Suppl. material_Mamot et al/data_timeseries_shearmachine_exp2b_WSK_spec3_Fig. S3.xlsx]

## Sheet: Sheet1
time_sec	shear_stress_kPa	shear_deform_mm
0.078	0	0.0675794
2.134	0	0.0348716
4.166	0	0.0348716
4.622	5.7948	0.0348716
6.67	5.79387	0.0163534
8.703	5.7948	0.0348716
10.735	5.79645	0.0675794
12.767	5.7948	0.0348716
14.798	5.79387	0.0163534
16.838	5.7948	0.0348716
18.87	5.79387	0.0163534
20.902	5.7948	0.0348716
22.942	5.79387	0.0163534
24.974	5.79387	0.0163534
27.023	5.79387	0.0163534
29.055	5.7948	0.0348716
31.086	5.79387	0.0163534
33.118	5.79387	0.0163534
35.15	5.7948	0.0348716
35.878	0	0.0163534
35.942	5.79387	0.0163534
36.134	0	0.0348716
36.206	5.79387	0.0163534
38.238	5.79387	0.0163534
40.27	5.79387	0.0163534
42.302	5.79387	0.0163534
43.687	0	0.0163534
43.895	5.79387	0.0163534
45.935	5.79645	0.0675794
47.967	5.7948	0.0348716
50.006	5.79387	0.0163534
52.038	5.79387	0.0163534
54.07	5.79387	0.0163534
56.102	5.7948	0.0348716
58.134	5.79387	0.0163534
60.174	5.79387	0.0163534
62.207	5.7948	0.0348716
64.247	5.7948	0.0348716
66.287	5.79387	0.0163534
68.318	5.7948	0.0348716
70.358	5.7948	0.0348716
72.39	5.79387	0.0163534
74.422	5.79387	0.0163534
76.454	5.79739	0.0860976
78.486	5.79387	0.0163534
80.527	5.79387	0.0163534
82.559	5.79387	0.0163534
84.598	5.79387	0.0163534
86.638	5.7948	0.0348716
88.67	5.7948	0.0348716
90.71	5.79387	0.0163534
92.742	5.7948	0.0348716
94.774	5.79387	0.0163534
96.807	5.7948	0.0348716
98.847	5.7948	0.0348716
100.887	5.79387	0.0163534
102.926	5.79387	0.0163534
104.958	5.79387	0.0163534
106.998	5.7948	0.0348716
109.03	5.7948	0.0348716
111.07	5.79387	0.0163534
113.102	5.79645	0.0675794
115.135	5.79387	0.0163534
117.167	5.7948	0.0348716
119.199	5.7948	0.0348716
121.238	5.7948	0.0348716
123.278	5.79387	0.0163534
125.31	5.79387	0.0163534
127.35	5.79387	0.0163534
129.382	5.7948	0.0348716
131.423	5.79645	0.0675794
133.455	5.79387	0.0163534
135.487	5.7948	0.0348716
137.518	5.7948	0.0348716
139.55	5.7948	0.0348716
141.59	5.7948	0.0348716
143.63	5.7948	0.0348716
145.662	5.79387	0.0163534
147.694	5.79387	0.0163534
149.727	5.79645	0.0675794
151.767	5.7948	0.0348716
153.807	5.79387	0.0163534
155.838	5.79387	0.0163534
157.87	5.7948	0.0348716
159.902	5.79387	0.0163534
161.942	5.79739	0.0860976
163.966	5.7948	0.0348716
165.974	5.79387	0.0163534
167.991	5.7948	0.0348716
170.015	5.79387	0.0163534
172.055	5.79387	0.0163534
174.078	5.79387	0.0163534
176.102	5.79387	0.0163534
178.134	5.7948	0.0348716
180.142	5.79387	0.0163534
182.15	5.79387	0.0163534
184.175	5.79739	0.0860976
186.215	5.7948	0.0348716
188.239	5.7948	0.0348716
190.254	5.79387	0.0163534
192.294	5.79645	0.0675794
194.31	5.79645	0.0675794
196.334	5.79387	0.0163534
198.366	5.7948	0.0348716
200.39	5.7948	0.0348716
202.431	5.79387	0.0163534
204.471	5.79739	0.0860976
206.51	5.7948	0.0348716
208.55	5.7948	0.0348716
210.582	5.7948	0.0348716
212.622	5.7948	0.0348716
214.654	5.79645	0.0675794
216.662	5.7948	0.0348716
218.671	5.79387	0.0163534
220.735	5.79387	0.0163534
222.743	5.79387	0.0163534
224.766	5.79387	0.0163534
226.782	5.7948	0.0348716
228.806	5.79387	0.0163534
230.838	5.79387	0.0163534
232.838	5.7948	0.0348716
234.862	5.7948	0.0348716
236.895	5.79387	0.0163534
238.903	5.7948	0.0348716
240.943	5.7948	0.0348716
242.982	5.79387	0.0163534
245.014	5.7948	0.0348716
247.046	5.79387	0.0163534
249.078	5.79387	0.0163534
251.11	5.79387	0.0163534
253.118	5.7948	0.0348716
255.119	5.79387	0.0163534
257.127	5.79387	0.0163534
259.135	5.79739	0.0860976
261.166	5.7948	0.0348716
263.198	5.79387	0.0163534
265.23	5.79387	0.0163534
267.246	5.79387	0.0163534
269.27	5.79387	0.0163534
271.295	5.7948	0.0348716
273.303	5.7948	0.0348716
275.327	5.7948	0.0348716
277.358	5.79739	0.0860976
279.382	5.7948	0.0348716
281.422	5.79387	0.0163534
283.438	5.79387	0.0163534
285.462	5.7948	0.0348716
287.486	5.7948	0.0348716
289.503	5.79387	0.0163534
291.519	5.79387	0.0163534
293.543	5.79387	0.0163534
295.574	5.79387	0.0163534
297.606	5.7948	0.0348716
299.638	5.79387	0.0163534
301.678	5.79387	0.0163534
303.694	5.7948	0.0348716
305.718	5.7948	0.0348716
307.743	5.79387	0.0163534
309.775	5.7948	0.0348716
311.806	5.79387	0.0163534
313.822	5.7948	0.0348716
315.854	5.79387	0.0163534
317.894	5.79387	0.0163534
319.918	5.7948	0.0348716
321.958	5.79387	0.0163534
323.983	5.7948	0.0348716
326.015	5.79387	0.0163534
328.031	5.7948	0.0348716
330.046	5.7948	0.0348716
332.062	5.79387	0.0163534
334.086	5.79387	0.0163534
336.102	5.7948	0.0348716
338.134	5.79387	0.0163534
340.142	5.79387	0.0163534
342.183	5.79387	0.0163534
344.215	5.7948	0.0348716
346.238	5.7948	0.0348716
348.254	5.79645	0.0675794
350.278	5.79387	0.0163534
352.31	5.79387	0.0163534
354.318	5.79387	0.0163534
356.326	5.7948	0.0348716
358.383	5.7948	0.0348716
360.391	5.79387	0.0163534
362.391	5.7948	0.0348716
364.407	5.7948	0.0348716
366.422	5.79387	0.0163534
368.446	5.79387	0.0163534
370.478	5.79387	0.0163534
372.502	5.7948	0.0348716
374.534	5.79387	0.0163534
376.559	5.79387	0.0163534
378.559	5.79387	0.0163534
380.575	5.7948	0.0348716
382.598	5.7948	0.0348716
384.614	5.79387	0.0163534
386.646	5.79387	0.0163534
388.662	5.79387	0.0163534
390.686	5.79387	0.0163534
392.702	5.79387	0.0163534
394.719	5.79645	0.0675794
396.735	5.79387	0.0163534
398.759	5.7948	0.0348716
400.766	5.7948	0.0348716
402.79	5.79387	0.0163534
404.798	5.7948	0.0348716
406.822	5.79387	0.0163534
408.822	5.79645	0.0675794
410.422	11.5935	0.0675794
412.455	11.6038	0.170032
414.471	11.6038	0.170032
416.494	11.6038	0.170032
418.494	11.609	0.221259
420.518	11.6142	0.272485
420.774	17.4216	0.272485
422.79	17.4216	0.272485
424.814	17.4216	0.272485
426.83	17.4294	0.323712
428.831	17.4372	0.374936
430.863	17.4372	0.374936
431.911	11.6298	0.426163
433.967	11.635	0.477389
435.974	11.635	0.477389
437.99	11.635	0.477389
439.422	17.4605	0.528616
439.614	11.6402	0.528616
439.742	17.4605	0.528616
439.998	11.6454	0.579842
440.062	17.4684	0.579842
440.318	11.6402	0.528616
440.774	17.4684	0.579842
440.838	11.6506	0.631069
442.894	11.6454	0.579842
444.902	11.6506	0.631069
445.03	17.4762	0.631069
445.094	11.6506	0.631069
445.158	17.484	0.682293
445.23	11.6506	0.631069
447.247	11.6558	0.682293
448.095	17.484	0.682293
448.231	11.6558	0.682293
448.423	17.484	0.682293
449.071	11.6558	0.682293
449.151	17.484	0.682293
449.735	11.6558	0.682293
451.791	11.6558	0.682293
453.358	17.484	0.682293
455.382	17.4918	0.73352
457.406	17.5075	0.835973
459.438	17.5154	0.887199
461.446	17.5154	0.887199
463.447	17.5154	0.887199
464.279	23.3639	0.938426
465.255	29.2052	0.938426
466.311	35.0459	0.938426
467.167	40.9055	0.98965
468.015	46.7494	0.98965
468.863	52.5927	0.98965
469.774	58.4367	0.98965
470.814	64.2806	0.98965
472.646	70.1869	1.0921
474.27	76.0361	1.0921
475.63	81.8846	1.0921
476.742	87.7338	1.0921
477.926	93.625	1.14333
479.174	99.4762	1.14333
480.35	105.328	1.14333
481.591	111.23	1.19456
483.007	117.136	1.24578
484.183	122.938	1.19456
485.175	128.85	1.24578
486.151	134.707	1.24578
487.135	140.564	1.24578
488.174	146.486	1.29701
489.286	152.415	1.34823
490.462	158.206	1.29701
491.71	164.065	1.29701
493.006	169.924	1.29701
494.246	175.863	1.34823
495.422	181.725	1.34823
496.662	187.587	1.34823
497.966	193.449	1.34823
499.087	199.401	1.39946
500.135	205.266	1.39946
501.399	211.131	1.39946
502.495	216.996	1.39946
503.407	223.061	1.50191
504.319	228.828	1.45069
505.422	234.696	1.45069
506.542	240.563	1.45069
507.518	246.43	1.45069
508.55	252.184	1.39946
509.654	258.281	1.50191
510.894	264.152	1.50191
511.998	269.9	1.45069
513.11	276.016	1.55314
514.414	281.889	1.55314
515.967	287.632	1.50191
517.455	293.634	1.55314
518.951	299.507	1.55314
520.511	305.38	1.55314
522.262	311.534	1.65559
524.286	311.534	1.65559
524.478	317.411	1.65559
526.51	317.411	1.65559
527.022	323.436	1.70682
528.902	329.316	1.70682
530.854	335.348	1.75804
532.862	335.197	1.70682
533.183	341.386	1.80927
535.191	347.429	1.8605
536.735	353.158	1.80927
537.839	359.044	1.80927
538.895	365.095	1.8605
539.934	370.816	1.80927
541.054	376.873	1.8605
542.302	382.761	1.8605
543.35	388.65	1.8605
544.462	394.717	1.91172
545.646	400.608	1.91172
546.758	406.5	1.91172
547.606	412.39	1.91172
548.582	418.282	1.91172
549.55	424.174	1.91172
550.542	430.259	1.96295
551.463	435.956	1.91172
552.439	441.848	1.91172
553.431	447.941	1.96295
554.479	454.041	2.01417
555.455	459.729	1.96295
556.375	465.623	1.96295
557.486	471.731	2.01417
558.67	477.627	2.01417
559.79	483.524	2.01417
560.838	489.643	2.0654
561.822	495.542	2.0654
562.902	501.441	2.0654
563.742	507.57	2.11663
564.662	513.24	2.0654
565.646	519.375	2.11663
566.622	525.276	2.11663
567.606	531.179	2.11663
568.519	537.081	2.11663
569.631	543.229	2.16785
570.671	548.885	2.11663
571.591	555.038	2.16785
572.511	560.943	2.16785
573.495	566.848	2.16785
574.415	572.492	2.11663
575.326	578.657	2.16785
576.174	584.562	2.16785
576.966	590.734	2.21908
577.638	596.371	2.16785
578.494	602.275	2.16785
579.286	608.456	2.21908
580.134	614.364	2.21908
581.046	620.834	2.32153
581.966	626.463	2.27031
582.942	632.086	2.21908
584.11	638.283	2.27031
585.19	644.193	2.27031
586.167	650.102	2.27031
587.079	656.311	2.32153
588.127	661.923	2.27031
589.183	668.136	2.32153
590.167	674.049	2.32153
591.142	679.962	2.32153
592.126	685.563	2.27031
593.23	691.787	2.32153
594.134	697.7	2.32153
595.054	703.932	2.37276
596.038	709.848	2.37276
597.078	715.763	2.37276
598.142	721.679	2.37276
599.062	727.594	2.37276
600.094	733.509	2.37276
601.142	739.761	2.42398
602.062	745.679	2.42398
603.046	751.597	2.42398
604.095	757.171	2.37276
605.519	763.433	2.42398
606.631	769.701	2.47521
607.743	775.975	2.52644
608.991	781.543	2.47521
610.174	787.464	2.47521
611.022	793.384	2.47521
611.87	799.669	2.52644
612.982	805.96	2.57766
614.03	811.516	2.52644
615.142	817.44	2.52644
616.182	823.363	2.52644
617.366	829.286	2.52644
618.462	835.21	2.52644
619.438	841.133	2.52644
620.494	847.057	2.52644
621.543	853.369	2.57766
622.711	859.295	2.57766
623.759	865.221	2.57766
624.807	871.148	2.57766
625.975	877.873	2.68011
627.078	883.402	2.62889
628.126	889.331	2.62889
629.11	895.668	2.68011
630.27	901.189	2.62889
631.574	907.531	2.68011
632.702	913.462	2.68011
633.814	919.394	2.68011
635.118	925.747	2.73134
636.294	931.682	2.73134
637.278	937.616	2.73134
638.327	943.55	2.73134
639.567	949.485	2.73134
640.935	955.419	2.73134
642.111	961.353	2.73134
643.415	967.729	2.78257
644.846	973.666	2.78257
646.094	979.603	2.78257
647.206	985.539	2.78257
648.454	991.477	2.78257
649.63	997.414	2.78257
651.062	1003.35	2.78257
652.294	1008.83	2.73134
653.598	1015.69	2.83379
654.902	1022.09	2.88502
656.071	1027.57	2.83379
657.103	1033.51	2.83379
658.215	1039.45	2.83379
659.399	1045.86	2.88502
660.639	1051.81	2.88502
661.807	1057.27	2.83379
663.046	1064.66	2.98747
664.358	1070.12	2.93625
665.542	1076.07	2.93625
666.662	1082.01	2.93625
667.71	1087.46	2.88502
668.886	1093.9	2.93625
670.054	1099.85	2.93625
671.174	1105.79	2.93625
672.486	1111.74	2.93625
673.799	1117.68	2.93625
675.039	1123.63	2.93625
676.279	1130.09	2.98747
677.527	1136.56	3.0387
678.774	1141.99	2.98747
680.406	1147.41	2.93625
681.886	1153.88	2.98747
683.374	1160.36	3.0387
684.934	1166.31	3.0387
686.158	1172.26	3.0387
687.382	1178.21	3.0387
688.55	1185.24	3.14115
689.782	1190.11	3.0387
691.327	1196.06	3.0387
692.887	1202.56	3.08992
694.463	1208.52	3.08992
696.111	1214.47	3.08992
697.286	1220.98	3.14115
698.526	1226.94	3.14115
699.702	1232.89	3.14115
701.006	1238.85	3.14115
702.574	1245.37	3.19238
704.334	1250.76	3.14115
706.214	1256.72	3.14115
707.918	1262.67	3.14115
709.551	1269.21	3.19238
711.111	1274.58	3.14115
712.535	1281.13	3.19238
714.095	1287.09	3.19238
715.734	1293.64	3.2436
717.542	1300.19	3.29483
719.574	1305.56	3.2436
721.334	1311.52	3.2436
722.766	1317.48	3.2436
724.326	1323.44	3.2436
725.038	1325.26	3.39728
725.294	1323.44	3.2436
725.422	1325.26	3.39728
725.487	1323.44	3.2436
725.815	1329.41	3.2436
726.679	1331.23	3.39728
726.943	1329.41	3.2436
727.207	1335.98	3.29483
728.951	1341.94	3.29483
730.847	1347.91	3.29483
731.039	1349.76	3.44851
731.135	1347.91	3.29483
732.574	1353.87	3.29483
733.822	1355.74	3.44851
734.278	1361.08	3.39728
735.982	1367.05	3.39728
737.614	1373.02	3.39728
739.318	1379.62	3.44851
740.95	1385.6	3.44851
742.702	1390.93	3.39728
744.727	1391.57	3.44851
744.855	1398.18	3.49973
746.887	1396.9	3.39728
747.343	1403.51	3.44851
749.231	1409.49	3.44851
751.182	1415.46	3.44851
753.182	1416.76	3.55096
753.246	1417.41	3.60219
753.774	1422.08	3.49973
755.774	1422.08	3.49973
756.678	1428.06	3.49973
757.07	1424.7	3.70464
757.134	1413.38	3.75586
757.206	1396.05	3.80709
757.27	1383.43	3.75586
757.334	1371.46	3.75586
757.398	1353.49	3.75586
757.462	1342.13	3.80709
757.534	1330.14	3.80709
757.606	1312.17	3.80709
757.67	1300.19	3.80709
757.734	1288.2	3.80709
757.798	1269.64	3.75586
757.87	1258.25	3.80709
757.934	1246.26	3.80709
757.998	1228.29	3.80709
758.062	1216.86	3.85832
758.126	1198.33	3.80709
758.198	1186.89	3.85832
758.262	1174.36	3.80709
758.326	1156.39	3.80709
758.39	1145.46	3.90954
758.454	1132.94	3.85832
758.526	1114.45	3.80709
758.59	1102.97	3.85832
758.654	1090.48	3.80709
758.718	1073	3.85832
758.782	1061.01	3.85832
758.854	1043.03	3.85832
758.918	1031.04	3.85832
758.982	1018.58	3.80709
759.046	1001.07	3.85832
759.11	989.077	3.85832
759.182	976.638	3.80709
759.246	959.105	3.85832
759.31	947.115	3.85832
759.382	935.127	3.85832
759.446	917.144	3.85832
759.518	905.155	3.85832
759.582	887.172	3.85832
759.646	875.183	3.85832
759.71	863.194	3.85832
759.774	845.211	3.85832
759.846	833.99	3.96077
759.91	821.611	3.90954
759.974	803.25	3.85832
760.038	791.261	3.85832
760.102	773.278	3.85832
760.174	761.64	3.90954
760.238	749.646	3.90954
760.302	731.317	3.85832
760.366	719.329	3.85832
760.43	707.665	3.90954
760.503	689.357	3.85832
760.567	677.367	3.85832
760.631	659.688	3.90954
760.695	647.097	3.80709
760.759	635.699	3.90954
760.831	617.708	3.90954
760.895	605.714	3.90954
760.959	593.446	3.85832
761.023	575.728	3.90954
761.087	563.474	3.85832
761.167	551.485	3.85832
761.231	533.502	3.85832
761.295	521.513	3.85832
761.359	503.298	3.80709
761.423	491.767	3.90954
761.495	479.773	3.90954
761.559	461.569	3.85832
761.623	449.58	3.85832
761.687	431.796	3.90954
761.751	419.801	3.90954
761.823	407.619	3.85832
761.887	389.815	3.90954
761.951	377.821	3.90954
762.015	365.827	3.90954
762.079	347.836	3.90954
762.151	335.841	3.90954
762.215	317.85	3.90954
762.279	305.997	3.96077
762.343	293.861	3.90954
762.407	275.742	3.85832
762.479	263.875	3.90954
762.543	251.881	3.90954
762.607	233.997	3.96077
762.671	221.895	3.90954
762.735	203.904	3.90954
762.807	191.909	3.90954
762.871	179.915	3.90954
762.943	161.924	3.90954
763.007	149.86	3.85832
763.071	131.937	3.90954
763.143	119.943	3.90954
763.207	107.949	3.90954
763.271	89.9573	3.90954
763.335	77.9631	3.90954
763.399	65.9993	3.96077
763.471	47.9773	3.90954
763.535	35.9991	3.96077
763.599	17.9999	3.96077
763.663	11.9942	3.90954
763.727	5.99678	3.90954
764.127	11.9942	3.90954
766.151	11.9997	3.96077
768.182	12.0052	4.012
769.43	18.0082	4.012
771.43	18.0082	4.012
773.43	18.0082	4.012
775.438	18.0082	4.012
777.47	18.0248	4.11445
779.503	18.0248	4.11445
781.511	18.0414	4.2169
783.527	18.0414	4.2169
785.59	18.0414	4.2169
787.646	18.0414	4.2169
789.67	18.0498	4.26812
791.71	18.0581	4.31935
793.734	18.0581	4.31935
795.767	18.0665	4.37058
797.799	18.0665	4.37058
799.823	18.0581	4.31935
801.879	18.0748	4.4218
803.886	18.0748	4.4218
805.918	18.0832	4.47303
807.942	18.0916	4.52426
809.974	18.0832	4.47303
811.982	18.0916	4.52426
813.983	18.1	4.57548
815.999	18.0916	4.52426
818.015	18.1084	4.62671
820.07	18.1084	4.62671
822.086	18.1168	4.67794
824.11	18.1168	4.67794
826.134	18.1084	4.62671
828.19	18.1252	4.72916
830.238	18.1336	4.78039
832.263	18.1336	4.78039
834.279	18.1336	4.78039
836.311	18.1336	4.78039
838.374	18.1504	4.88284
840.382	18.1504	4.88284
842.406	18.1504	4.88284
844.438	18.1504	4.88284
846.494	18.1589	4.93406
848.519	18.1589	4.93406
850.527	18.1673	4.98529
852.559	18.1758	5.03652
854.63	18.1758	5.03652
856.646	18.1842	5.08774
858.406	24.2452	5.08774
860.438	24.2678	5.1902
861.926	30.3069	5.08774
863.83	36.3848	5.13897
865.791	42.4492	5.13897
867.791	42.4888	5.24142
868.575	48.5589	5.24142
870.607	48.5589	5.24142
871.846	54.6284	5.24142
873.854	54.6284	5.24142
875.886	54.6284	5.24142
877.91	54.6539	5.29265
879.918	54.6794	5.34388
881.934	54.6794	5.34388
883.503	60.7551	5.34388
885.527	60.7551	5.34388
887.583	60.7551	5.34388
889.599	60.7835	5.3951
891.622	60.8119	5.44633
893.646	60.8119	5.44633
895.662	60.7835	5.3951
897.542	66.8933	5.44633
899.542	66.9558	5.54878
901.543	66.9246	5.49755
903.551	66.9558	5.54878
905.551	66.9558	5.54878
907.614	66.9871	5.6
909.622	66.9871	5.6
911.662	66.9558	5.54878
913.662	66.9558	5.54878
915.662	66.9558	5.54878
917.694	67.0185	5.65123
919.711	67.0185	5.65123
921.719	66.9871	5.6
923.727	66.9871	5.6
925.734	67.0185	5.65123
927.75	67.0499	5.70246
929.774	67.0499	5.70246
931.79	67.0499	5.70246
933.822	67.0499	5.70246
934.606	73.1792	5.75368
936.623	73.1792	5.75368
938.639	73.1792	5.75368
940.655	73.2134	5.80491
942.678	73.1792	5.75368
944.694	73.2134	5.80491
946.734	73.2134	5.80491
948.774	73.2478	5.85614
950.79	73.2478	5.85614
952.799	73.2478	5.85614
954.807	73.2478	5.85614
956.831	73.2821	5.90736
958.855	73.2821	5.90736
958.983	79.4264	5.95859
961.006	79.352	5.85614
963.022	79.3892	5.90736
965.062	79.3892	5.90736
967.094	79.4264	5.95859
969.126	79.4637	6.00982
970.567	85.5759	6.00982
972.591	85.5358	5.95859
974.607	85.5759	6.00982
976.623	85.6161	6.06104
976.687	91.7318	6.06104
978.702	91.7318	6.06104
980.542	97.8475	6.06104
982.574	97.8475	6.06104
984.598	97.8935	6.11227
985.654	104.06	6.16349
987.686	104.011	6.11227
989.711	104.06	6.16349
991.759	104.06	6.16349
993.511	110.182	6.16349
995.534	110.182	6.16349
997.55	110.182	6.16349
999.574	110.234	6.21472
1000.56	116.358	6.21472
1002.57	116.358	6.21472
1004.58	116.413	6.26594
1005.81	122.539	6.26594
1007.84	122.539	6.26594
1009.85	122.539	6.26594
1011.86	122.597	6.31717
1012.71	116.467	6.31717
1014.52	110.337	6.31717
1016.02	104.207	6.31717
1017.5	98.124	6.3684
1019.53	98.0778	6.31717
1020.53	91.991	6.3684
1022.55	91.991	6.3684
1022.87	98.1702	6.41962
1024.9	98.1702	6.41962
1026.93	98.2164	6.47085
1028.95	98.2164	6.47085
1030.98	98.2628	6.52208
1031.97	92.1211	6.52208
1033.97	92.1646	6.5733
1035.98	92.208	6.62453
1038	92.208	6.62453
1040.03	92.2516	6.67576
1042.05	92.2952	6.72698
1044.06	92.2516	6.67576
1046.11	92.3388	6.77821
1048.17	92.3824	6.82943
1050.21	92.4261	6.88066
1052.21	92.4261	6.88066
1054.24	92.4261	6.88066
1056.25	92.4699	6.93189
1058.26	92.5136	6.98311
1060.3	92.5136	6.98311
1062.33	92.6013	7.08556
1064.36	92.6013	7.08556
1066.38	92.6013	7.08556
1068.38	92.6452	7.13679
1070.42	92.6892	7.18802
1072.45	92.6892	7.18802
1074.45	92.6892	7.18802
1076.46	92.7331	7.23924
1078.48	92.7772	7.29047
1080.5	92.7772	7.29047
1082.53	92.7772	7.29047
1084.55	92.7772	7.29047
1086.57	92.8212	7.3417
1088.58	92.8653	7.39292
1090.61	92.8653	7.39292
1092.64	92.8653	7.39292
1094.66	92.9095	7.44415
1096.67	92.9537	7.49537
1098.68	92.9537	7.49537
1099.65	99.1508	7.49537
1101.66	99.198	7.5466
1103.72	99.198	7.5466
1105.73	99.2452	7.59783
1107.74	99.2452	7.59783
1108.26	93.0422	7.59783
1108.46	99.2452	7.59783
1109.05	93.0422	7.59783
1110.09	99.2925	7.64905
1112.13	99.2925	7.64905
1114.16	99.3398	7.70028
1116.18	99.3872	7.75151
1118.25	99.4346	7.80273
1120.26	99.3872	7.75151
1122.27	99.4346	7.80273
1124.29	99.3872	7.75151
1126.3	99.482	7.85396
1128.31	99.482	7.85396
1130.37	99.482	7.85396
1132.42	99.5295	7.90518
1134.45	99.5295	7.90518
1136.46	99.5295	7.90518
1138.49	99.5295	7.90518
1140.53	99.577	7.95641
1142.55	99.6246	8.00763
1144.55	99.6246	8.00763
1146.55	99.6722	8.05886
1148.59	99.6722	8.05886
1150.61	99.6246	8.00763
1152.64	99.6722	8.05886
1154.65	99.7199	8.11009
1156.67	99.7199	8.11009
1158.68	99.7199	8.11009
1160.69	99.7676	8.16131
1162.72	99.7676	8.16131
1164.74	99.8153	8.21254
1165.26	93.5766	8.21254
1167.27	93.5319	8.16131
1169.28	93.5766	8.21254
1171.29	93.6215	8.26377
1173.29	93.6215	8.26377
1175.3	93.6215	8.26377
1177.31	93.6215	8.26377
1179.35	93.6663	8.31499
1179.54	99.911	8.31499
1179.93	93.5766	8.21254
1181.95	93.6663	8.31499
1182.21	99.911	8.31499
1183.13	93.6663	8.31499
1185.16	93.6663	8.31499
1187.2	93.6663	8.31499
1189.2	93.6663	8.31499
1191.21	93.6663	8.31499
1193.26	93.6663	8.31499
1195.29	93.6663	8.31499
1197.29	93.7112	8.36622
1199.33	93.7112	8.36622
1201.36	93.7112	8.36622
1203.38	93.8011	8.46867
1203.84	100.007	8.41745
1205.87	100.055	8.46867
1207.89	100.103	8.5199
1209.91	100.103	8.5199
1211.21	93.8462	8.5199
1213.24	93.9815	8.67357
1215.26	93.9363	8.62235
1217.29	93.9815	8.67357
1219.31	93.9815	8.67357
1221.32	94.0267	8.7248
1223.35	94.0719	8.77603
1225.37	94.0719	8.77603
1227.39	94.0719	8.77603
1229.4	94.1625	8.87848
1231.44	94.1172	8.82725
1233.46	94.2079	8.92971
1235.47	94.2079	8.92971
1237.48	94.2079	8.92971
1239.48	94.3442	9.08339
1241.5	94.2987	9.03216
1243.53	94.2987	9.03216
1245.59	94.3442	9.08339
1247.62	94.3897	9.13461
1249.65	94.3442	9.08339
1251.67	94.3897	9.13461
1253.69	94.3897	9.13461
1254.2	100.683	9.13461
1254.85	94.3897	9.13461
1256.87	94.4353	9.18584
1258.93	94.4809	9.23706
1260.95	94.4353	9.18584
1262.97	94.4809	9.23706
1264.98	94.5723	9.33951
1266.98	94.4809	9.23706
1268.98	94.5266	9.28829
1270.99	94.4809	9.23706
1273.01	94.5723	9.33951
1274.89	100.877	9.33951
1276.92	100.877	9.33951
1278.93	100.877	9.33951
1280.94	100.926	9.39074
1282.94	100.975	9.44197
1284.46	94.7556	9.54442
1286.46	94.6639	9.44197
1288.51	94.7097	9.49319
1290.57	94.7097	9.49319
1292.62	94.7097	9.49319
1294.62	94.7556	9.54442
1295.21	101.073	9.54442
1297.26	101.073	9.54442
1299.19	94.8015	9.59565
1301.2	94.8015	9.59565
1303.21	94.8015	9.59565
1305.26	94.8475	9.64687
1305.97	101.171	9.64687
1308.03	101.171	9.64687
1308.35	94.8935	9.6981
1310.4	94.8935	9.6981
1312.41	94.9395	9.74933
1313.96	101.22	9.6981
1314.42	94.9395	9.74933
1316.43	94.9395	9.74933
1318.48	95.0318	9.85178
1320.53	94.9856	9.80055
1322.54	95.0318	9.85178
1324.6	94.9856	9.80055
1325.25	101.417	9.903
1327.31	101.367	9.85178
1329.37	101.367	9.85178
1331.41	101.417	9.903
1332.05	95.0318	9.85178
1334.11	95.0779	9.903
1336.12	95.1242	9.95423
1338.17	95.1242	9.95423
1340.21	95.1242	9.95423
1342.26	95.1242	9.95423
1342.85	101.466	9.95423
1344.91	101.466	9.95423
1345.43	95.1704	10.0055
1347.45	95.1242	9.95423
1349.51	95.1704	10.0055
1351.51	95.2168	10.0567
1353.56	95.1704	10.0055
1355.57	95.1704	10.0055
1357.57	95.1704	10.0055
1358.93	88.8255	10.0055
1360.98	88.8255	10.0055
1363.03	88.8255	10.0055
1365.04	88.8255	10.0055
1367.09	88.8255	10.0055
1369.09	88.8687	10.0567
1371.09	88.8687	10.0567
1371.41	95.2168	10.0567
1371.61	88.8687	10.0567
1371.99	95.2168	10.0567
1374.02	95.2168	10.0567
1376.08	95.2168	10.0567
1378.13	95.2168	10.0567
1380.17	95.2168	10.0567
1382.23	95.2168	10.0567
1384.23	95.2631	10.1079
1384.36	101.614	10.1079
1386.41	101.614	10.1079
1387.44	108.017	10.1591
1389.44	108.07	10.2104
1390.42	101.664	10.1591
1392.44	101.713	10.2104
1394.1	95.4025	10.2616
1395.39	101.763	10.2616
1397.4	101.813	10.3128
1399.08	95.449	10.3128
1401.13	95.4956	10.364
1403.13	95.4956	10.364
1403.26	101.912	10.4153
1405.29	101.912	10.4153
1407.35	101.962	10.4665
1408.57	95.5889	10.4665
1410.62	95.6356	10.5177
1412.65	95.5889	10.4665
1414.65	95.7292	10.6202
1416.71	95.7292	10.6202
1417.53	102.012	10.5177
1417.85	95.6824	10.5689
1417.97	102.111	10.6202
1418.93	95.7292	10.6202
1420.93	95.776	10.6714
1421.19	102.111	10.6202
1423.24	102.111	10.6202
1423.95	95.776	10.6714
1424.93	102.111	10.6202
1425.33	95.776	10.6714
1425.41	102.111	10.6202
1425.66	95.7292	10.6202
1427.67	95.776	10.6714
1429.68	95.8229	10.7226
1431.73	95.8229	10.7226
1433.8	95.776	10.6714
1435.8	95.8229	10.7226
1437.85	95.776	10.6714
1439.85	95.8229	10.7226
1441.85	95.776	10.6714
1443.91	95.8229	10.7226
1445.97	95.8698	10.7738
1448.02	95.8229	10.7226
1450.07	95.8698	10.7738
1452.12	95.8698	10.7738
1454.17	95.8229	10.7226
1456.21	95.8698	10.7738
1458.21	95.8698	10.7738
1460.21	95.8698	10.7738
1462.21	95.8698	10.7738
1464.26	95.8698	10.7738
1466.28	95.8698	10.7738
1468.33	95.8698	10.7738
1470.33	95.8698	10.7738
1472.34	95.8698	10.7738
1474.17	102.312	10.8251
1475.53	95.9168	10.8251
1476.7	89.6099	10.9275
1478.26	83.2504	10.9788
1480.31	83.2504	10.9788
1482.36	83.3322	11.0812
1482.42	89.6979	11.03
1483.39	96.1524	11.0812
1485.15	102.613	11.1324
1487.18	102.664	11.1837
1489.24	102.664	11.1837
1491.29	102.714	11.2349
1493.29	102.765	11.2861
1495.35	102.765	11.2861
1497.41	102.866	11.3886
1499.46	102.866	11.3886
1501.5	102.917	11.4398
1503.53	102.967	11.491
1505.53	103.069	11.5935
1507.54	102.967	11.491
1509.54	103.12	11.6447
1511.57	103.069	11.5935
1513.61	103.171	11.6959
1515.62	103.171	11.6959
1517.64	103.222	11.7471
1519.65	103.324	11.8496
1521.65	103.375	11.9008
1523.67	103.375	11.9008
1525.69	103.426	11.952
1527.74	103.477	12.0033
1529.77	103.58	12.1057
1531.8	103.58	12.1057
1533.81	103.631	12.157
1535.87	103.683	12.2082
1537.89	103.683	12.2082
1539.94	103.734	12.2594
1541.99	97.2991	12.3106
1544.01	97.3474	12.3619
1545.17	103.837	12.3619
1545.49	97.3474	12.3619
1545.55	103.837	12.3619
1547.59	103.889	12.4131
1549.6	103.889	12.4131
1551.61	103.941	12.4643
1553.62	103.993	12.5155
1555.68	103.993	12.5155
1557.73	104.096	12.618
1559.73	104.096	12.618
1561.73	104.148	12.6692
1563.79	104.148	12.6692
1565.81	104.252	12.7717
1567.81	104.252	12.7717
1569.83	104.252	12.7717
1571.85	104.304	12.8229
1573.86	104.356	12.8741
1575.89	104.356	12.8741
1577.89	104.408	12.9253
1579.9	104.46	12.9766
1581.96	104.408	12.9253
1582.54	97.9313	12.9766
1584.57	97.9313	12.9766
1586.62	97.9803	13.0278
1588.68	98.0293	13.079
1589.64	104.513	13.0278
1589.7	98.0293	13.079
1590.28	104.565	13.079
1591.18	98.0293	13.079
1591.7	104.565	13.079
1593.76	104.565	13.079
1595.77	104.617	13.1303
1596.73	98.1274	13.1815
1597.64	104.67	13.1815
1599.45	98.1274	13.1815
1601.48	98.1274	13.1815
1603.49	98.1766	13.2327
1605.5	98.1766	13.2327
1606.14	104.774	13.2839
1608.21	104.774	13.2839
1610.22	104.827	13.3352
1612.23	104.827	13.3352
1614.23	104.88	13.3864
1614.75	98.2751	13.3352
1616.77	98.3737	13.4376
1618.8	98.3243	13.3864
1620.81	98.3737	13.4376
1622.81	104.932	13.4376
1623.78	98.3737	13.4376
1625.85	98.4231	13.4888
1626.68	104.985	13.4888
1628.23	98.3737	13.4376
1629.15	104.985	13.4888
1629.66	98.4231	13.4888
1630.24	104.985	13.4888
1632.29	105.038	13.5401
1633.13	98.4231	13.4888
1635.18	98.4725	13.5401
1637.24	105.09	13.5913
1639.24	105.09	13.5913
1641.29	105.09	13.5913
1643.29	105.143	13.6425
1644.21	98.5716	13.6425
1646.22	98.5716	13.6425
1648.27	98.6211	13.6937
1650.33	98.5716	13.6425
1652.38	98.6211	13.6937
1654.38	98.6211	13.6937
1656.38	98.6708	13.745
1656.45	105.196	13.6937
1658.47	105.249	13.745
1660.48	105.196	13.6937
1662.53	105.249	13.745
1664.59	105.249	13.745
1666.65	105.302	13.7962
1668.7	105.302	13.7962
1669.98	98.7702	13.8474
1672.03	98.82	13.8986
1673.89	105.355	13.8474
1675.94	105.355	13.8474
1678	105.355	13.8474
1680	105.461	13.9499
1682.05	105.408	13.8986
1684.05	105.408	13.8986
1686.07	105.461	13.9499
1688.09	105.461	13.9499
1690.14	105.461	13.9499
1692.14	105.568	14.0523
1694.16	105.568	14.0523
1696.17	105.568	14.0523
1696.69	98.9696	14.0523
1698.71	98.9696	14.0523
1700.72	99.0196	14.1035
1702.39	105.675	14.1548
1703.77	99.0696	14.1548
1704.16	105.728	14.206
1704.29	99.1197	14.206
1704.49	105.728	14.206
1706.51	105.781	14.2572
1707.15	99.1698	14.2572
1707.28	105.781	14.2572
1708.9	99.22	14.3085
1710.92	99.22	14.3085
1712.14	105.835	14.3085
1714.2	105.942	14.4109
1716.21	99.3708	14.4621
1716.28	105.996	14.4621
1718.29	106.103	14.5646
1718.62	99.3708	14.4621
1720.64	99.4211	14.5134
1722.53	106.103	14.5646
1724.55	106.157	14.6158
1726.57	106.157	14.6158
1728.61	106.211	14.667
1730.68	106.265	14.7183
1732.68	106.211	14.667
1734.68	106.265	14.7183
1736.69	106.319	14.7695
1738.5	99.7244	14.8207
1738.95	106.373	14.8207
1741.01	106.427	14.8719
1743.01	106.427	14.8719
1745.03	106.427	14.8719
1747.09	106.427	14.8719
1749.09	106.535	14.9744
1751.11	106.535	14.9744
1753.11	106.59	15.0256
1755.13	106.59	15.0256
1757.01	99.9275	15.0256
1759.01	99.9784	15.0768
1761.01	99.9275	15.0256
1763.02	99.9784	15.0768
1765.02	99.9784	15.0768
1767.02	99.9784	15.0768
1769.07	99.9784	15.0768
1771.12	99.9784	15.0768
1773.17	99.9784	15.0768
1775.19	99.9784	15.0768
1777.2	99.9784	15.0768
1779.25	99.9784	15.0768
1781.3	99.9784	15.0768
1783.37	100.029	15.1281
1784.54	93.3129	15.0768
1786.55	93.3605	15.1281
1788.61	93.4081	15.1793
1790.61	100.08	15.1793
1792.56	106.698	15.1281
1794.57	106.753	15.1793
1794.76	100.131	15.2305
1796.05	93.4081	15.1793
1797.02	86.7365	15.1793
1797.98	80.105	15.2305
1799.09	73.43	15.2305
