# Supplementary material for: A temperature- and stress-controlled failure criterion for ice-filledpermafrost rock joints
Source: Copernicus journal article supplement (doi:10.5194/tc-2018-57), 2018-03-28
Supplement: Supplementary file 1 [file tc-2018-57-supplement.zip › Suppl. material_Mamot et al/data_timeseries_shearmachine_exp3b_WSK_spec3_Fig. S3.xlsx]

## Sheet: Sheet1
time_sec	shear_stress_kPa	shear_deform_mm
0.077	0	0.00755487
1.78	5.67659	0.00755487
3.78	5.67835	0.0436711
4.612	0	0.00755487
6.236	5.67659	0.00755487
6.3	0	0.00755487
6.364	5.67835	0.0436711
7.644	0	0.00755487
9.692	0	0.00755487
11.741	0	0.0436711
13.789	0	0.0436711
15.837	0	0.0436711
17.837	0	0.00755487
19.844	0	0.00755487
21.868	0	0.00755487
23.9	0	0.00755487
25.924	0	0.00755487
27.965	0	0.00755487
29.981	0	0.00755487
31.989	0	0.00755487
34.013	0	0.0587819
36.036	0	0.00755487
38.06	0	0.00755487
40.068	0	0.00755487
42.084	0	0.0587819
44.108	0	0.00755487
46.173	0	0.0587819
48.181	0	0.0436711
50.181	0	0.0436711
52.197	0	0.00755487
54.212	0	0.00755487
56.22	0	0.00755487
58.22	0	0.00755487
60.22	0	0.00755487
62.276	0	0.0436711
64.333	0	0.0436711
66.389	0	0.0948971
68.437	0	0.00755487
70.493	0	0.00755487
72.54	0	0.00755487
74.54	0	0.0436711
76.54	0	0.0436711
78.588	0	0.00755487
80.637	0	0.00755487
82.685	0	0.0436711
84.733	0	0.00755487
86.781	0	0.00755487
88.828	0	0.00755487
90.876	0	0.00755487
92.924	0	0.00755487
94.972	0	0.00755487
97.02	0	0.00755487
99.069	0	0.0436711
101.117	0	0.00755487
103.173	0	0.0436711
105.221	0	0.00755487
107.268	0	0.00755487
109.316	0	0.00755487
111.364	0	0.0587819
113.412	0	0.00755487
115.461	0	0.00755487
117.509	0	0.00755487
119.557	0	0.00755487
121.605	0	0.00755487
123.652	0	0.0436711
125.7	0	0.00755487
127.748	0	0.00755487
129.796	0	0.00755487
131.844	0	0.00755487
133.893	0	0.0436711
135.941	0	0.0436711
137.989	0	0.00755487
140.037	0	0.00755487
142.084	0	0.00755487
144.14	0	0.00755487
146.188	0	0.00755487
148.236	0	0.0587819
150.285	0	0.00755487
152.333	0	0.00755487
154.381	0	0.0587819
156.437	0	0.0587819
158.492	0	0.0436711
158.556	5.67659	0.00755487
158.82	0	0.00755487
159.404	5.67659	0.00755487
161.46	5.67659	0.00755487
163.508	5.67659	0.00755487
163.572	0	0.00755487
165.62	0	0.0436711
167.669	0	0.00755487
169.717	0	0.0436711
171.765	0	0.00755487
173.813	0	0.00755487
175.868	0	0.00755487
177.916	0	0.00755487
179.916	0	0.00755487
180.5	5.67659	0.00755487
180.572	0	0.00755487
180.764	5.67659	0.00755487
180.956	0	0.00755487
183.004	0	0.0587819
185.053	0	0.00755487
187.101	0	0.00755487
189.157	0	0.0436711
189.413	5.67835	0.0436711
189.541	0	0.00755487
189.861	5.67659	0.00755487
191.917	5.67659	0.00755487
193.972	5.67659	0.00755487
196.02	5.67659	0.00755487
196.596	0	0.00755487
198.652	0	0.00755487
200.7	0	0.00755487
202.749	0	0.0436711
204.797	0	0.00755487
206.845	0	0.00755487
208.893	0	0.00755487
209.597	5.67659	0.00755487
209.661	0	0.0436711
211.012	5.67835	0.0436711
213.068	5.67659	0.00755487
215.116	5.67659	0.00755487
217.172	5.67659	0.00755487
219.22	5.67659	0.00755487
221.269	5.68085	0.0948971
223.317	5.67659	0.00755487
225.365	5.67659	0.00755487
225.877	0	0.00755487
226.077	5.67659	0.00755487
226.397	0	0.0436711
228.452	0	0.00755487
229.156	5.67659	0.00755487
229.292	0	0.00755487
231.348	0	0.00755487
231.476	5.67659	0.00755487
231.612	0	0.00755487
231.876	5.67659	0.00755487
232.132	0	0.00755487
232.196	5.67909	0.0587819
234.244	5.67659	0.00755487
236.292	5.67659	0.00755487
238.341	5.67659	0.00755487
239.109	0	0.0436711
240.581	5.67659	0.00755487
240.773	0	0.00755487
242.309	5.67659	0.00755487
242.637	0	0.0436711
243.797	5.67659	0.00755487
243.925	0	0.00755487
244.053	5.67659	0.00755487
244.956	0	0.00755487
245.021	5.67835	0.0436711
245.085	0	0.00755487
245.405	5.67659	0.00755487
245.669	0	0.00755487
245.796	5.67659	0.00755487
246.308	0	0.0436711
247.34	5.67659	0.00755487
247.748	0	0.00755487
249.772	0	0.00755487
251.772	0	0.00755487
253.804	0	0.00755487
255.861	0	0.00755487
257.717	5.67659	0.00755487
257.781	0	0.00755487
257.973	5.67659	0.00755487
258.101	0	0.00755487
258.293	5.67659	0.00755487
258.357	0	0.0436711
260.405	5.67659	0.00755487
260.469	0	0.00755487
260.597	5.67659	0.00755487
262.517	0	0.0436711
262.581	5.67659	0.00755487
262.645	0	0.00755487
262.708	5.67835	0.0436711
263.668	0	0.00755487
263.932	5.67659	0.00755487
264.06	0	0.00755487
264.188	5.67659	0.00755487
266.244	5.67659	0.00755487
266.372	0	0.0587819
268.428	0	0.00755487
270.476	0	0.0436711
272.525	0	0.00755487
274.573	5.67659	0.00755487
274.701	0	0.00755487
274.765	5.67659	0.00755487
276.765	5.67659	0.00755487
278.821	5.67659	0.00755487
280.868	5.67659	0.00755487
282.916	5.67659	0.00755487
283.62	0	0.00755487
285.676	0	0.00755487
287.724	0	0.00755487
289.773	0	0.00755487
291.821	0	0.0587819
293.869	0	0.00755487
295.917	0	0.00755487
297.069	5.67659	0.00755487
297.909	0	0.00755487
299.964	5.67659	0.00755487
300.028	0	0.00755487
300.22	5.67659	0.00755487
300.484	0	0.0587819
300.548	5.67659	0.00755487
300.612	0	0.00755487
300.74	5.67835	0.0436711
301.252	0	0.00755487
303.308	0	0.00755487
305.356	0	0.00755487
307.413	0	0.00755487
309.077	5.67659	0.00755487
309.205	0	0.0587819
309.269	5.67659	0.00755487
311.317	5.67659	0.00755487
311.837	0	0.00755487
313.837	0	0.0948971
314.029	5.67835	0.0436711
314.413	0	0.0436711
314.669	5.67659	0.00755487
314.997	0	0.00755487
317.052	0	0.0436711
319.1	0	0.00755487
321.148	0	0.00755487
323.196	0	0.00755487
325.245	0	0.00755487
326.845	5.67659	0.00755487
327.037	0	0.00755487
327.165	5.67659	0.00755487
329.221	5.67835	0.0436711
331.269	5.67659	0.00755487
333.316	5.67659	0.00755487
335.364	5.67659	0.00755487
337.412	5.67835	0.0436711
339.46	5.67659	0.00755487
341.508	5.67659	0.00755487
343.557	5.67659	0.00755487
345.605	5.67659	0.00755487
347.661	5.67659	0.00755487
349.709	5.67659	0.00755487
351.756	5.67659	0.00755487
353.804	5.67659	0.00755487
354.324	0	0.00755487
354.516	5.67659	0.00755487
354.58	0	0.00755487
355.988	5.67659	0.00755487
358.036	5.67659	0.00755487
360.085	5.67909	0.0587819
362.133	5.67659	0.00755487
364.141	5.67659	0.00755487
366.173	5.67659	0.00755487
368.204	5.67659	0.00755487
370.244	5.67659	0.00755487
372.244	5.67659	0.00755487
374.276	5.67659	0.00755487
376.3	5.67659	0.00755487
378.301	5.67659	0.00755487
380.301	5.67659	0.00755487
382.357	5.67835	0.0436711
384.421	5.67659	0.00755487
386.468	5.67659	0.00755487
388.516	5.67659	0.00755487
390.564	5.67659	0.00755487
392.62	5.67659	0.00755487
394.677	5.67659	0.00755487
396.725	5.67835	0.0436711
398.141	0	0.00755487
400.189	0	0.00755487
400.509	5.67659	0.00755487
400.581	0	0.00755487
400.709	5.67659	0.00755487
402.317	0	0.00755487
402.389	5.67659	0.00755487
404.444	5.67835	0.0436711
406.492	5.67835	0.0436711
408.54	5.68085	0.0948971
410.524	11.3673	0.146124
412.573	11.3723	0.197349
414.621	11.3773	0.248575
416.669	11.3773	0.248575
417.245	17.0663	0.248575
419.293	17.0738	0.299801
420.253	22.7647	0.299801
422.284	22.7748	0.351028
422.412	28.4688	0.351028
424.46	28.494	0.453481
426.516	28.494	0.453481
428.572	28.494	0.453481
430.621	28.5066	0.504705
432.669	28.5192	0.555932
434.717	28.5572	0.709611
436.765	28.5445	0.658385
438.82	28.5572	0.709611
440.868	28.5572	0.709611
442.916	28.5698	0.760838
444.972	28.5825	0.812062
447.028	28.5952	0.863289
449.077	28.6079	0.914516
451.125	28.6079	0.914516
453.173	28.6206	0.965742
455.221	28.6333	1.01697
457.268	28.6333	1.01697
459.316	28.6461	1.0682
461.364	28.6588	1.11942
463.412	28.6716	1.17065
465.461	28.6843	1.22187
467.509	28.6716	1.17065
469.557	28.6843	1.22187
471.605	28.7099	1.32433
473.652	28.7227	1.37555
475.7	28.7227	1.37555
477.748	28.7355	1.42678
479.796	28.7484	1.478
481.852	28.7484	1.478
483.901	28.7612	1.52923
485.949	28.7612	1.52923
487.997	28.774	1.58046
490.045	28.7869	1.63168
492.092	28.7869	1.63168
494.14	28.7998	1.68291
496.188	28.8127	1.73413
498.236	28.8127	1.73413
500.285	28.8256	1.78536
502.341	28.8385	1.83659
504.389	28.8385	1.83659
506.445	28.8385	1.83659
508.492	28.8643	1.93904
510.548	28.8643	1.93904
512.596	28.8773	1.99027
514.644	28.8773	1.99027
516.7	28.9032	2.09272
518.749	28.9032	2.09272
520.797	28.9161	2.14394
522.845	28.9161	2.14394
524.892	28.9421	2.2464
526.94	28.9421	2.2464
528.988	28.9421	2.2464
531.036	28.9551	2.29762
533.084	28.9551	2.29762
535.133	28.9682	2.34885
537.181	28.9682	2.34885
539.229	28.9812	2.40007
541.285	28.9942	2.4513
543.332	28.9942	2.4513
545.38	29.0073	2.50253
547.436	29.0073	2.50253
549.444	29.0204	2.55375
551.492	29.0465	2.6562
553.541	29.0204	2.55375
555.565	29.0465	2.6562
557.565	29.0596	2.70743
559.613	29.0596	2.70743
561.66	29.0728	2.75866
563.708	29.0728	2.75866
565.756	29.0728	2.75866
567.804	29.0859	2.80988
569.853	29.0859	2.80988
571.901	29.099	2.86111
573.949	29.099	2.86111
575.997	29.099	2.86111
578.053	29.1253	2.96356
580.06	29.1253	2.96356
582.108	29.1253	2.96356
584.164	29.1253	2.96356
586.212	29.1517	3.06601
588.261	29.1649	3.11724
590.309	29.1649	3.11724
592.357	29.1649	3.11724
594.405	29.1781	3.16847
596.452	29.1781	3.16847
598.5	29.1649	3.11724
600.556	29.1913	3.21969
602.604	29.2046	3.27092
604.653	29.2046	3.27092
606.701	29.2046	3.27092
608.749	29.2178	3.32214
610.797	29.2178	3.32214
612.836	29.2311	3.37337
614.892	29.2311	3.37337
616.94	29.2443	3.4246
618.988	29.2576	3.47582
621.036	29.2443	3.4246
623.085	29.2576	3.47582
625.133	29.2576	3.47582
627.181	29.2709	3.52705
629.229	29.2576	3.47582
631.276	29.2709	3.52705
633.324	29.2709	3.52705
635.372	29.2842	3.57828
637.42	29.2842	3.57828
639.469	29.2842	3.57828
641.517	29.2842	3.57828
643.565	29.2842	3.57828
645.613	29.2975	3.6295
647.661	29.3109	3.68073
647.789	35.1727	3.68073
649.836	35.1887	3.73195
651.884	35.1887	3.73195
653.932	35.1887	3.73195
654.828	41.0351	3.68073
656.877	41.0538	3.73195
657.133	46.9188	3.73195
659.189	46.9402	3.78318
659.509	52.8074	3.78318
661.509	52.8074	3.78318
663.173	58.6751	3.78318
665.229	58.7018	3.83441
666.636	64.5723	3.83441
668.692	64.5723	3.83441
669.652	70.4742	3.88563
671.708	70.4421	3.83441
672.796	76.3473	3.88563
674.797	76.3473	3.88563
676.845	76.3473	3.88563
677.165	82.2573	3.93686
679.213	82.2198	3.88563
681.213	82.2573	3.93686
683.069	88.1733	3.98809
685.124	88.2135	4.03931
687.148	88.1733	3.98809
688.62	94.0517	3.98809
690.676	94.0517	3.98809
692.725	94.1376	4.09054
694.733	94.0517	3.98809
694.925	100.021	4.09054
696.981	100.021	4.09054
698.981	100.021	4.09054
701.036	100.067	4.14176
703.068	100.067	4.14176
705.116	100.112	4.19299
706.14	94.2237	4.19299
708.172	94.2237	4.19299
708.236	88.3345	4.19299
709.973	82.4453	4.19299
712.029	82.4453	4.19299
713.213	76.5917	4.24422
715.229	76.5917	4.24422
716.765	70.6998	4.24422
718.82	70.7321	4.29544
720.804	64.8678	4.34667
722.852	64.8381	4.29544
724.9	64.8678	4.34667
726.949	64.8381	4.29544
728.997	64.8678	4.34667
729.061	58.9435	4.29544
731.117	58.9975	4.3979
733.173	58.9975	4.3979
735.229	58.9975	4.3979
737.284	58.9975	4.3979
739.332	58.9975	4.3979
741.388	58.9975	4.3979
743.436	59.0245	4.44912
745.485	59.0245	4.44912
747.533	59.0516	4.50035
749.581	59.0516	4.50035
751.629	59.0786	4.55157
753.676	59.0786	4.55157
755.724	59.0786	4.55157
757.78	59.1057	4.6028
759.828	59.1328	4.65403
761.885	59.1328	4.65403
763.933	59.1057	4.6028
765.981	59.16	4.70525
768.029	59.16	4.70525
770.077	59.2144	4.8077
772.132	59.2144	4.8077
774.18	59.2144	4.8077
776.228	59.2144	4.8077
778.284	59.2416	4.85893
778.412	65.166	4.85893
780.461	65.2259	4.96138
782.509	65.1959	4.91016
784.557	65.2259	4.96138
785.773	71.1552	4.96138
787.829	71.1552	4.96138
789.876	71.1879	5.01261
791.924	71.1879	5.01261
793.652	77.1205	5.01261
795.708	77.1205	5.01261
797.757	77.1916	5.11506
799.037	83.0907	5.06384
801.093	83.129	5.11506
803.109	83.1673	5.16629
803.749	89.0671	5.11506
805.749	89.1081	5.16629
807.684	95.0927	5.21751
809.74	95.0927	5.21751
811.284	100.989	5.16629
813.34	101.082	5.26874
815.389	101.082	5.26874
816.093	107.029	5.26874
818.149	107.078	5.31997
820.165	107.029	5.26874
820.613	113.027	5.31997
822.669	113.027	5.31997
823.116	119.03	5.37119
825.172	119.03	5.37119
825.428	124.982	5.37119
827.428	124.982	5.37119
829.476	124.982	5.37119
829.732	130.994	5.42242
831.789	131.054	5.47364
833.837	131.054	5.47364
835.309	137.011	5.47364
837.365	137.011	5.47364
839.413	137.011	5.47364
841.02	143.035	5.52487
843.02	143.035	5.52487
845.068	143.167	5.62732
847.116	143.035	5.52487
848.012	149.063	5.5761
850.069	149.132	5.62732
852.125	149.132	5.62732
854.173	155.098	5.62732
856.221	155.098	5.62732
858.268	155.169	5.67855
858.396	161.063	5.62732
860.396	161.138	5.67855
861.292	167.105	5.67855
863.348	167.105	5.67855
863.804	173.074	5.67855
865.852	173.074	5.67855
866.62	179.124	5.72978
868.677	179.124	5.72978
869.509	185.095	5.72978
871.557	185.267	5.83223
871.941	191.155	5.781
873.989	191.155	5.781
874.501	197.128	5.781
876.548	197.128	5.781
878.02	203.196	5.83223
880.076	203.102	5.781
881.1	209.173	5.83223
883.028	215.249	5.88345
884.957	221.228	5.88345
887.013	221.331	5.93468
887.781	227.207	5.88345
889.837	227.207	5.88345
890.221	233.186	5.88345
892.157	239.165	5.88345
893.956	245.144	5.88345
896.012	245.258	5.93468
896.908	251.357	5.98591
898.964	251.24	5.93468
899.988	257.222	5.93468
901.981	263.326	5.98591
903.965	269.311	5.98591
906.013	275.423	6.03713
907.813	281.411	6.03713
909.485	287.398	6.03713
911.348	293.385	6.03713
913.404	293.385	6.03713
913.532	299.373	6.03713
915.588	299.373	6.03713
916.1	305.361	6.03713
917.964	311.348	6.03713
919.565	317.336	6.03713
921.429	323.473	6.08836
923.477	323.473	6.08836
923.541	329.617	6.13958
925.541	329.463	6.08836
925.797	335.454	6.08836
927.852	335.454	6.08836
928.237	341.444	6.08836
930.26	341.602	6.13958
930.58	347.434	6.08836
932.62	353.589	6.13958
934.228	359.415	6.08836
935.9	365.405	6.08836
937.445	371.568	6.13958
939.501	377.561	6.13958
941.165	383.376	6.08836
942.837	389.728	6.19081
944.892	389.728	6.19081
945.404	395.724	6.19081
947.46	395.724	6.19081
947.588	401.72	6.19081
949.068	407.715	6.19081
950.108	413.711	6.19081
950.94	419.707	6.19081
951.908	425.703	6.19081
952.948	431.9	6.24204
953.916	437.898	6.24204
954.885	443.897	6.24204
955.717	450.315	6.34449
956.621	456.106	6.29326
957.645	462.108	6.29326
958.549	468.109	6.29326
959.389	474.111	6.29326
960.357	480.336	6.34449
961.253	486.34	6.34449
962.221	492.573	6.39572
963.308	498.348	6.34449
964.428	504.352	6.34449
965.588	510.594	6.39572
966.612	516.601	6.39572
967.708	522.608	6.39572
968.796	528.616	6.39572
969.948	534.871	6.44694
971.044	540.881	6.44694
972.205	546.891	6.44694
973.293	552.901	6.44694
974.773	558.911	6.44694
975.869	564.92	6.44694
976.901	570.93	6.44694
978.053	577.209	6.49817
979.333	582.95	6.44694
980.493	589.234	6.49817
981.46	595.247	6.49817
982.492	601.259	6.49817
983.532	607.272	6.49817
984.5	613.571	6.54939
985.34	619.297	6.49817
986.236	625.602	6.54939
987.26	631.617	6.54939
988.284	637.632	6.54939
989.317	643.949	6.60062
990.341	649.663	6.54939
991.373	656.291	6.65185
992.397	662.312	6.65185
993.629	668.333	6.65185
994.677	674.04	6.60062
995.709	680.057	6.60062
996.677	686.396	6.65185
997.701	692.417	6.65185
998.788	698.112	6.60062
999.956	704.459	6.65185
1001.05	710.48	6.65185
1002.08	716.501	6.65185
1003.37	722.86	6.70307
1004.79	728.543	6.65185
1005.95	734.907	6.70307
1007.17	740.932	6.70307
1008.4	746.955	6.70307
1009.48	753.331	6.7543
1010.45	759.357	6.7543
1011.41	765.384	6.7543
1012.44	771.411	6.7543
1013.78	777.801	6.80552
1015.01	783.464	6.7543
1016.16	789.86	6.80552
1017.45	795.517	6.7543
1018.74	801.544	6.7543
1019.82	807.948	6.80552
1021.04	813.978	6.80552
1022.4	819.624	6.7543
1023.49	826.037	6.80552
1024.6	832.455	6.85675
1025.76	838.096	6.80552
1026.93	844.52	6.85675
1028.02	850.552	6.85675
1028.99	856.184	6.80552
1030.01	862.617	6.85675
1031.11	868.649	6.85675
1032.53	874.272	6.80552
1034.07	880.714	6.85675
1036.12	886.746	6.85675
1037.72	892.778	6.85675
1039.08	898.811	6.85675
1040.49	905.266	6.90798
1041.9	910.875	6.85675
1043.44	916.908	6.85675
1044.79	923.372	6.90798
1046.08	928.972	6.85675
1047.56	935.442	6.90798
1049.23	941.477	6.90798
1050.84	947.512	6.90798
1052.2	953.547	6.90798
1053.42	959.582	6.90798
1054.64	965.618	6.90798
1056.19	971.652	6.90798
1057.92	977.688	6.90798
1059.53	984.184	6.9592
1061.08	990.221	6.9592
1062.43	995.793	6.90798
1063.58	1002.3	6.9592
1064.87	1008.34	6.9592
1066.37	1014.37	6.9592
1067.79	1020.41	6.9592
1069.13	1026.45	6.9592
1070.6	1032.97	7.01043
1072.08	1039.01	7.01043
1073.5	1045.05	7.01043
1074.78	1051.09	7.01043
1076	1057.13	7.01043
1077.24	1063.17	7.01043
1078.84	1069.72	7.06165
1080.5	1075.26	7.01043
1082.49	1081.8	7.06165
1083.97	1087.34	7.01043
1085.39	1093.89	7.06165
1086.8	1099.93	7.06165
1088.09	1105.98	7.06165
1089.57	1112.02	7.06165
1090.99	1118.06	7.06165
1092.27	1124.11	7.06165
1093.8	1130.15	7.06165
1095.41	1136.2	7.06165
1097.21	1142.78	7.11288
1098.82	1148.82	7.11288
1099.91	1154.87	7.11288
1101.2	1160.91	7.11288
1102.81	1166.96	7.11288
1104.72	1173.56	7.16411
1106.67	1179.61	7.16411
1108.2	1185.66	7.16411
1109.56	1192.26	7.21533
1110.8	1197.75	7.16411
1112.29	1203.8	7.16411
1113.82	1209.85	7.16411
1115.3	1215.9	7.16411
1116.65	1221.95	7.16411
1118.13	1228	7.16411
1119.61	1234.63	7.21533
1121.09	1240.68	7.21533
1122.71	1246.73	7.21533
1123.87	1252.79	7.21533
1125.28	1258.84	7.21533
1126.89	1264.3	7.16411
1128.76	1270.94	7.21533
1130.81	1270.94	7.21533
1130.88	1276.99	7.21533
1132.42	1282.44	7.16411
1133.77	1289.7	7.26656
1135.12	1295.15	7.21533
1136.6	1301.81	7.26656
1138.27	1307.87	7.26656
1139.8	1313.92	7.26656
1141.36	1319.98	7.26656
1143.15	1326.66	7.31779
1145.2	1326.66	7.31779
1145.72	1332.09	7.26656
1147.77	1332.71	7.31779
1149.18	1338.77	7.31779
1151.05	1335.85	7.57392
1151.11	1323.71	7.57392
1151.18	1312.18	7.62514
1151.24	1293.96	7.62514
1151.31	1282.41	7.67637
1151.37	1270.25	7.67637
1151.44	1258.1	7.67637
1151.51	1245.94	7.67637
1151.57	1227.71	7.67637
1151.64	1215.55	7.67637
1151.7	1203.4	7.67637
1151.77	1191.8	7.72759
1151.84	1179.09	7.67637
1151.9	1161.4	7.72759
1151.96	1148.7	7.67637
1152.03	1136.54	7.67637
1152.09	1124.39	7.67637
1152.17	1111.71	7.62514
1152.23	1100.08	7.67637
1152.29	1081.84	7.67637
1152.36	1069.69	7.67637
1152.43	1058.03	7.72759
1152.5	1045.87	7.72759
1152.56	1034.2	7.77882
1152.63	1014.99	7.67637
1152.69	1002.83	7.67637
1152.76	991.144	7.72759
1152.83	979.444	7.77882
1152.89	966.821	7.72759
1152.96	948.579	7.72759
1153.02	936.418	7.72759
1153.08	924.257	7.72759
1153.16	912.095	7.72759
1153.22	899.934	7.72759
1153.29	887.773	7.72759
1153.35	869.531	7.72759
1153.41	857.37	7.72759
1153.48	845.209	7.72759
1153.55	833.44	7.77882
1153.61	820.886	7.72759
1153.68	802.644	7.72759
1153.74	790.483	7.72759
1153.81	778.689	7.77882
1153.88	766.521	7.77882
1153.94	753.999	7.72759
1154.01	742.188	7.77882
1154.07	723.596	7.72759
1154.14	711.77	7.77882
1154.21	699.933	7.83005
1154.28	687.436	7.77882
1154.34	675.269	7.77882
1154.41	657.018	7.77882
1154.48	644.851	7.77882
1154.54	632.386	7.72759
1154.6	620.517	7.77882
1154.67	608.35	7.77882
1154.73	590.1	7.77882
1154.81	577.933	7.77882
1154.87	565.499	7.72759
1154.93	553.338	7.72759
1155	541.432	7.77882
1155.06	529.265	7.77882
1155.13	511.014	7.77882
1155.2	498.847	7.77882
1155.26	486.68	7.77882
1155.32	474.737	7.83005
1155.39	462.564	7.83005
1155.46	444.096	7.77882
1155.53	431.929	7.77882
1155.59	419.762	7.77882
1155.65	407.595	7.77882
1155.72	395.428	7.77882
1155.79	377.177	7.77882
1155.85	365.355	7.88127
1155.92	353.01	7.83005
1155.99	340.837	7.83005
1156.05	328.664	7.83005
1156.12	310.405	7.83005
1156.19	298.091	7.77882
1156.25	286.059	7.83005
1156.32	273.758	7.77882
1156.38	261.591	7.77882
1156.45	249.541	7.83005
1156.52	231.282	7.83005
1156.58	219.213	7.88127
1156.64	206.937	7.83005
1156.71	194.764	7.83005
1156.78	182.591	7.83005
1156.84	164.332	7.83005
1156.91	152.231	7.88127
1156.97	139.986	7.83005
1157.04	127.814	7.83005
1157.11	115.641	7.83005
1157.17	97.382	7.83005
1157.24	85.2088	7.83005
1157.3	73.0362	7.83005
1157.36	60.8636	7.83005
1157.44	48.691	7.83005
1157.5	36.5178	7.83005
1157.56	18.2678	7.88127
1157.63	12.1783	7.88127
1158.94	18.2592	7.83005
1159.28	12.1783	7.88127
1160.05	18.2851	7.98373
1161.02	12.1783	7.88127
1163.08	12.1841	7.9325
1163.52	18.2765	7.9325
1163.72	12.1841	7.9325
1163.91	18.2765	7.9325
1165.96	18.2765	7.9325
1168.01	18.3024	8.08618
1169.73	24.3912	8.03495
1171.73	24.3912	8.03495
1173.78	24.4028	8.08618
1173.84	30.5038	8.08618
1175.9	30.5038	8.08618
1177.95	30.5038	8.08618
1180	30.5182	8.1374
1182.05	30.5182	8.1374
1184.08	30.5471	8.23986
1186.13	30.5326	8.18863
1188.17	30.5326	8.18863
1190.22	30.5471	8.23986
1192.27	30.5471	8.23986
1194.32	30.5471	8.23986
1196.37	30.5616	8.29108
1198.42	30.5616	8.29108
1200.47	30.5616	8.29108
1202.52	30.5906	8.39354
1204.52	30.6051	8.44476
1206.56	30.6051	8.44476
1208.61	30.6051	8.44476
1210.66	30.6196	8.49599
1212.71	30.6051	8.44476
1214.76	30.6196	8.49599
1216.81	30.6196	8.49599
1218.85	30.6341	8.54721
1220.9	30.6487	8.59844
1222.96	30.6341	8.54721
1225.01	30.6487	8.59844
1227.05	30.6633	8.64967
1229.11	30.6633	8.64967
1231.16	30.6633	8.64967
1233.2	30.6633	8.64967
1235.25	30.6778	8.70089
1237.3	30.6778	8.70089
1239.35	30.6778	8.70089
1241.4	30.6924	8.75212
1243.44	30.707	8.80334
1245.49	30.707	8.80334
1247.54	30.707	8.80334
1249.59	30.707	8.80334
1251.64	30.7363	8.9058
1253.69	30.7217	8.85457
1255.73	30.7363	8.9058
1257.79	30.7363	8.9058
1259.84	30.7363	8.9058
1261.89	30.751	8.95702
1263.94	30.7656	9.00825
1266	30.8097	9.16193
1268.05	30.7803	9.05948
1270.1	30.7803	9.05948
1272.15	30.7803	9.05948
1274.2	30.7803	9.05948
1276.24	30.7803	9.05948
1278.29	30.8097	9.16193
1280.32	30.7803	9.05948
1282.36	30.8244	9.21315
1284.41	30.8244	9.21315
1286.46	30.8244	9.21315
1288.51	30.8391	9.26438
1290.56	30.8391	9.26438
1292.61	30.8391	9.26438
1294.66	30.8539	9.31561
1296.71	30.8539	9.31561
1298.76	30.8686	9.36683
1300.8	30.8686	9.36683
1302.85	30.8686	9.36683
1304.9	30.8686	9.36683
1306.95	30.8834	9.41806
1309	30.8982	9.46928
1311.05	30.913	9.52051
1313.09	30.913	9.52051
1315.15	30.913	9.52051
1316.17	37.113	9.57174
1318.22	37.113	9.57174
1319.88	43.2988	9.57174
1321.94	49.5083	9.62296
1324	49.5083	9.62296
1324.19	55.6965	9.62296
1326.24	55.7232	9.67419
1328.29	55.7767	9.77664
1330.34	55.7767	9.77664
1332.39	55.7767	9.77664
1333.16	62.0042	9.82787
1335.21	62.0042	9.82787
1337.26	62.0042	9.82787
1337.71	68.2048	9.82787
1339.77	68.2376	9.8791
1340.72	74.4764	9.93032
1342.78	74.4764	9.93032
1343.61	80.6443	9.8791
1345.67	80.7219	9.98155
1347.01	86.9309	9.98155
1349.07	86.9309	9.98155
1350.6	93.1853	10.0328
1352.65	93.2301	10.084
1353.1	99.3979	10.0328
1355.16	99.4457	10.084
1355.73	105.661	10.084
1357.73	105.661	10.084
1359.08	111.876	10.084
1361.13	111.876	10.084
1362.29	118.149	10.1352
1364.01	124.367	10.1352
1365.85	130.648	10.1865
1367.91	130.648	10.1865
1368.74	136.869	10.1865
1370.8	136.869	10.1865
1372.4	143.16	10.2377
1374.44	143.229	10.2889
1374.64	149.384	10.2377
1376.69	149.456	10.2889
1377.13	155.683	10.2889
1379.19	155.683	10.2889
1380.34	161.989	10.3401
1382.39	162.067	10.3914
1382.96	168.22	10.3401
1384.82	174.534	10.3914
1386.68	180.767	10.3914
1388.74	180.767	10.3914
1389.7	187	10.3914
1391.7	187.091	10.4426
1392.66	193.234	10.3914
1394.71	193.327	10.4426
1394.9	199.564	10.4426
1396.96	199.564	10.4426
1397.29	205.899	10.4938
1399.33	205.999	10.545
1399.53	212.242	10.545
1400.82	218.484	10.545
1402.3	224.835	10.5963
1403.65	231.192	10.6475
1404.82	237.555	10.6987
1406.88	237.67	10.7499
1408.93	237.67	10.7499
1410.97	237.785	10.8012
1412.57	231.641	10.8524
1414.63	231.753	10.9036
1415.08	225.38	10.8524
1417.08	219.439	11.0061
1419.13	219.545	11.0573
1419.58	213.272	11.0573
1421.64	213.272	11.0573
1423.68	213.583	11.211
1424.71	207.301	11.211
1426.75	207.301	11.211
1428.8	207.301	11.211
1430.84	207.503	11.3134
1432.89	207.604	11.3647
1434.94	207.807	11.4671
1437	207.604	11.3647
1439.04	207.705	11.4159
1441.09	207.908	11.5183
1443.15	201.608	11.5183
1445.2	201.706	11.5696
1447.24	201.805	11.6208
1449.29	202.002	11.7232
1451.02	195.498	11.6208
1453.07	195.689	11.7232
1455.12	195.689	11.7232
1457.17	195.881	11.8257
1459.23	195.881	11.8257
1461.28	195.881	11.8257
1463.33	195.976	11.8769
1465.38	196.072	11.9281
1467.43	196.168	11.9794
1469.48	196.168	11.9794
1471.53	196.264	12.0306
1473.58	196.457	12.133
1475.63	196.264	12.0306
1477.68	196.361	12.0818
1478.32	190.119	12.133
1480.42	190.119	12.133
1482.47	190.213	12.1843
1482.72	196.65	12.2355
1484.77	196.553	12.1843
1485.35	202.994	12.2355
1487.4	202.994	12.2355
1489.44	203.093	12.2867
1491.49	203.193	12.338
1493.16	196.843	12.338
1495.22	196.843	12.338
1497.27	196.94	12.3892
1497.72	190.68	12.4404
1499.77	190.68	12.4404
1501.81	190.774	12.4916
1503.86	190.774	12.4916
1505.91	190.962	12.5941
1505.97	197.328	12.5941
1507.51	190.868	12.5429
1509.56	190.962	12.5941
1511.61	190.962	12.5941
1513.66	191.056	12.6453
1515.71	191.056	12.6453
1517.76	191.15	12.6965
1519.81	191.15	12.6965
1521.85	191.245	12.7478
1523.9	191.245	12.7478
1525.95	191.245	12.7478
1528	191.339	12.799
1530.04	191.433	12.8502
1532.09	191.433	12.8502
1534.14	191.433	12.8502
1536.19	191.528	12.9014
1538.24	191.528	12.9014
1540.3	191.622	12.9527
1542.35	191.622	12.9527
1543.76	198.108	13.0039
1545.82	198.206	13.0551
1547.87	198.108	13.0039
1549.92	198.206	13.0551
1550.56	191.812	13.0551
1552.61	191.812	13.0551
1554.66	192.002	13.1576
1555.36	198.304	13.1063
1557.4	198.402	13.1576
1559.44	198.599	13.26
1561.36	192.097	13.2088
1563.42	192.097	13.2088
1565.47	192.192	13.26
1567.52	192.287	13.3112
1569.57	192.383	13.3625
1571.62	192.287	13.3112
1573.67	192.383	13.3625
1574.5	185.97	13.3625
1576.56	186.062	13.4137
1578.6	186.062	13.4137
1580.65	186.155	13.4649
1582.7	186.247	13.5162
1584.75	186.155	13.4649
1586.8	186.155	13.4649
1588.84	186.247	13.5162
1590.89	186.155	13.4649
1592.94	186.247	13.5162
1593.75	192.765	13.5674
1595.8	192.765	13.5674
1597.85	192.861	13.6186
1599.9	192.957	13.6698
1600.35	199.29	13.6186
1602.4	199.389	13.6698
1604.44	199.389	13.6698
1605.85	192.957	13.6698
1607.9	193.149	13.7723
1609.95	193.149	13.7723
1612	193.149	13.7723
1614.04	193.245	13.8235
1616.09	193.245	13.8235
1618.14	193.341	13.8747
1619.36	186.897	13.8747
1621.41	186.897	13.8747
1621.93	193.245	13.8235
1623.02	186.99	13.926
1625.08	186.897	13.8747
1626.48	193.341	13.8747
1628.35	186.99	13.926
1628.6	193.437	13.926
1630.65	193.534	13.9772
1632.7	193.534	13.9772
1634.75	193.63	14.0284
1636.8	193.63	14.0284
1638.85	193.727	14.0796
1639.24	187.27	14.0796
1641.3	187.27	14.0796
1643.35	187.457	14.1821
1645.37	187.27	14.0796
1647.42	187.363	14.1309
1649.47	187.457	14.1821
1651.52	187.457	14.1821
1653.56	187.457	14.1821
1655.61	187.551	14.2333
1657.66	187.644	14.2845
1657.85	194.017	14.2333
1659.91	194.017	14.2333
1661.96	194.114	14.2845
1664	194.114	14.2845
1666.05	194.212	14.3358
1668.1	194.212	14.3358
1669.83	187.738	14.3358
1671.89	187.832	14.387
1673.93	187.832	14.387
1675.98	187.832	14.387
1676.24	181.355	14.387
1678.29	181.355	14.387
1679	188.02	14.4894
1681.04	187.926	14.4382
1683.09	188.02	14.4894
1685.14	188.02	14.4894
1687.19	188.02	14.4894
1689.24	188.02	14.4894
1691.29	188.02	14.4894
1693.34	188.209	14.5919
1695.39	188.209	14.5919
1697.44	188.303	14.6431
1699.48	188.115	14.5407
1701.53	188.209	14.5919
1703.58	188.209	14.5919
1705.63	188.303	14.6431
1707.68	188.398	14.6944
1709.72	188.398	14.6944
1711.77	188.398	14.6944
1713.82	188.492	14.7456
1715.87	188.492	14.7456
1717.92	188.398	14.6944
1719.97	188.587	14.7968
1722.02	188.587	14.7968
1724.07	188.587	14.7968
1726.12	188.682	14.848
1728.17	188.682	14.848
1730.21	188.587	14.7968
1732.26	188.777	14.8993
1734.31	188.777	14.8993
1736.36	188.872	14.9505
1738.4	188.777	14.8993
1740.45	188.872	14.9505
1742.5	188.872	14.9505
1744.53	188.967	15.0017
1746.58	188.967	15.0017
1748.63	188.967	15.0017
1750.68	188.967	15.0017
1752.72	188.967	15.0017
1754.77	189.062	15.0529
1756.82	189.157	15.1042
1758.87	189.157	15.1042
1760.92	189.062	15.0529
1762.96	189.157	15.1042
1765.01	189.253	15.1554
1767.05	189.253	15.1554
1769.09	189.253	15.1554
1770.95	182.726	15.1554
1773	182.726	15.1554
1774.72	176.29	15.2066
1776.77	176.201	15.1554
1778.18	169.675	15.1554
1780.18	169.76	15.2066
1782.23	163.148	15.1554
1784.29	163.231	15.2066
1786.34	163.231	15.2066
1788.39	163.148	15.1554
1790.44	163.148	15.1554
1792.48	163.313	15.2578
1794.53	163.231	15.2066
1796.59	163.231	15.2066
1796.92	156.702	15.2066
1798.97	156.702	15.2066
