# Supplementary material for: A temperature- and stress-controlled failure criterion for ice-filledpermafrost rock joints
Source: Copernicus journal article supplement (doi:10.5194/tc-2018-57), 2018-03-28
Supplement: Supplementary file 1 [file tc-2018-57-supplement.zip › Suppl. material_Mamot et al/data_timeseries_shearmachine_exp5b_WSK_spec2_Fig. S3.xlsx]

## Sheet: Sheet1
time_sec	shear_stress_kPa	shear_deform_mm
0.077	0	0.0545067
2.149	0	0.00328067
4.196	0	0.00328067
6.228	0	0.00328067
8.26	0	0.105734
10.293	0	0.00328067
12.333	0	0.0479463
14.357	0	0.00328067
16.389	0	0.00328067
18.421	0	0.00328067
20.453	0	0.00328067
22.508	0	0.00328067
24.54	0	0.00328067
26.573	0	0.00328067
28.621	0	0.00328067
30.653	0	0.0479463
32.693	0	0.00328067
34.725	0	0.00328067
36.757	0	0.0545067
38.788	0	0.00328067
40.82	0	0.00328067
42.868	0	0.00328067
44.901	0	0.0479463
46.933	0	0.00328067
48.973	0	0.0545067
51.005	0	0.0479463
53.069	0	0.00328067
55.109	0	0.00328067
57.14	0	0.00328067
59.18	0	0.0479463
61.213	0	0.0545067
63.253	0	0.00328067
65.285	0	0.00328067
67.333	0	0.0545067
69.365	0	0.00328067
71.397	0	0.00328067
73.436	0	0.0479463
75.436	0	0.0479463
77.46	0	0.00328067
79.493	0	0.00328067
81.541	0	0.00328067
83.581	0	0.00328067
85.613	0	0.00328067
87.645	0	0.00328067
89.677	0	0.00328067
91.708	0	0.00328067
93.748	0	0.0545067
95.78	0	0.00328067
97.813	0	0.00328067
99.845	0	0.00328067
101.877	0	0.00328067
103.917	0	0.00328067
105.949	0	0.0479463
107.996	0	0.00328067
110.036	0	0.0479463
112.084	0	0.0545067
114.125	0	0.00328067
116.157	0	0.00328067
118.189	0	0.00328067
120.221	0	0.0479463
122.253	0	0.00328067
124.317	0	0.00328067
126.348	0	0.00328067
128.38	0	0.0479463
130.412	0	0.00328067
132.445	0	0.00328067
134.485	0	0.0479463
136.517	0	0.00328067
138.549	0	0.00328067
140.581	0	0.00328067
142.637	0	0.0545067
144.676	0	0.00328067
146.708	0	0.00328067
148.741	0	0.0479463
150.773	0	0.00328067
152.805	0	0.0479463
154.845	0	0.00328067
156.877	0	0.00328067
158.909	0	0.00328067
160.94	0	0.0479463
162.972	0	0.00328067
165.02	0	0.0545067
167.053	0	0.00328067
169.093	0	0.00328067
171.125	0	0.0545067
173.181	0	0.0479463
175.221	0	0.0991713
177.253	0	0.00328067
179.284	0	0.00328067
181.316	0	0.00328067
183.349	0	0.00328067
185.389	0	0.00328067
187.445	0	0.00328067
189.485	0	0.00328067
191.517	0	0.00328067
193.549	0	0.00328067
195.588	0	0.00328067
197.62	0	0.0545067
199.652	0	0.00328067
201.709	0	0.00328067
203.741	0	0.00328067
205.781	0	0.0479463
207.781	0	0.00328067
209.821	0	0.0479463
211.853	0	0.00328067
213.884	0	0.00328067
215.916	0	0.00328067
217.956	0	0.00328067
219.997	0	0.00328067
222.029	0	0.00328067
224.061	0	0.00328067
226.093	0	0.00328067
228.133	0	0.00328067
230.173	0	0.0479463
232.228	0	0.0479463
234.26	0	0.0479463
236.293	0	0.00328067
238.333	0	0.0479463
240.365	0	0.00328067
242.397	0	0.00328067
244.429	0	0.00328067
246.429	0	0.0479463
248.46	0	0.00328067
250.5	0	0.00328067
252.532	0	0.00328067
254.565	0	0.0479463
256.597	0	0.0545067
258.629	0	0.00328067
260.669	0	0.00328067
262.725	0	0.0479463
264.757	0	0.00328067
266.788	0	0.0479463
268.82	0	0.00328067
270.861	0	0.0479463
272.893	0	0.00328067
274.933	0	0.00328067
276.965	0	0.0479463
278.997	0	0.0479463
281.037	0	0.00328067
283.068	0	0.00328067
285.1	0	0.00328067
287.132	0	0.0545067
289.165	0	0.00328067
291.229	0	0.0479463
293.261	0	0.00328067
295.293	0	0.00328067
297.325	0	0.00328067
299.357	0	0.00328067
301.396	0	0.0479463
303.452	0	0.00328067
305.484	0	0.0479463
307.517	0	0.00328067
309.557	0	0.00328067
311.597	0	0.0479463
313.629	0	0.00328067
315.661	0	0.0479463
317.692	0	0.00328067
319.724	0	0.00328067
321.724	0	0.00328067
323.765	0	0.0479463
325.797	0	0.00328067
327.829	0	0.00328067
329.877	0	0.00328067
331.909	0	0.00328067
333.949	0	0.00328067
335.981	0	0.00328067
338.012	0	0.00328067
340.044	0	0.0479463
342.077	0	0.0479463
344.117	0	0.00328067
346.149	0	0.0479463
348.181	0	0.00328067
350.221	0	0.0479463
352.245	0	0.00328067
354.308	0	0.00328067
356.356	0	0.00328067
358.413	0	0.0479463
360.461	0	0.00328067
362.509	0	0.00328067
364.557	0	0.00328067
366.605	0	0.00328067
368.661	0	0.0479463
370.709	0	0.0479463
372.772	0	0.0479463
374.788	0	0.00328067
376.837	0	0.0479463
378.885	0	0.00328067
380.933	0	0.0479463
382.981	0	0.00328067
385.037	0	0.00328067
387.085	0	0.00328067
389.132	0	0.00328067
391.188	0	0.00328067
393.237	0	0.00328067
395.285	0	0.0545067
397.333	0	0.00328067
399.381	0	0.00328067
401.237	5.60289	0.0545067
403.285	5.6078	0.15696
404.637	11.2162	0.15696
405.468	16.8246	0.15696
406.236	22.4422	0.208187
407.068	28.053	0.208187
407.916	33.6781	0.259411
408.764	39.3259	0.361864
409.548	44.9441	0.361864
410.589	50.5174	0.259411
412.637	50.5617	0.361864
414.045	44.9638	0.41309
416.045	44.9836	0.464317
418.093	45.0034	0.515543
418.669	39.3604	0.464317
420.725	39.3951	0.56677
422.78	39.3951	0.56677
424.828	39.4297	0.669221
426.3	33.7967	0.669221
428.309	33.8116	0.720447
430.357	33.8414	0.8229
432.413	33.8712	0.925351
434.501	33.8563	0.874127
436.557	33.8712	0.925351
438.557	33.8862	0.976578
440.621	33.8862	0.976578
442.668	33.9012	1.0278
444.668	33.9012	1.0278
446.701	33.9161	1.07903
448.757	33.9311	1.13026
450.805	33.9461	1.18148
452.861	33.9611	1.23271
454.901	33.9611	1.23271
456.917	33.9912	1.33516
458.98	33.9912	1.33516
461.036	33.9912	1.33516
463.061	34.0063	1.38639
465.069	34.0213	1.43761
467.117	34.0364	1.48884
469.165	34.0364	1.48884
471.213	34.0666	1.59129
473.237	34.0666	1.59129
475.285	34.0666	1.59129
477.332	34.0818	1.64252
479.38	34.0969	1.69374
481.429	34.112	1.74497
483.485	34.112	1.74497
485.541	34.1272	1.7962
487.589	34.1272	1.7962
489.637	34.1272	1.7962
491.685	34.1424	1.84742
493.732	34.1424	1.84742
495.204	39.8508	1.89865
497.252	39.8685	1.94987
499.301	39.8685	1.94987
501.349	39.8685	1.94987
501.605	45.5846	2.0011
503.661	45.5846	2.0011
504.237	51.2823	2.0011
505.837	56.9806	2.0011
507.893	62.7347	2.10355
509.893	62.7347	2.10355
510.285	68.4375	2.10355
512.292	68.4681	2.15478
513.188	74.174	2.15478
515.236	74.174	2.15478
516.069	79.9149	2.20601
518.085	79.9149	2.20601
519.565	85.6616	2.25723
521.613	85.6999	2.30846
522.381	91.3726	2.25723
524.381	91.4134	2.30846
525.029	97.083	2.25723
527.029	97.1264	2.30846
528.052	102.886	2.35968
530.084	102.886	2.35968
530.724	108.651	2.41091
532.612	114.369	2.41091
534.341	120.087	2.41091
535.821	125.862	2.46214
536.981	131.583	2.46214
538.325	137.243	2.41091
539.669	143.025	2.46214
540.693	148.746	2.46214
541.725	154.467	2.46214
542.685	160.259	2.51336
543.645	166.057	2.56459
544.541	171.783	2.56459
545.452	177.51	2.56459
546.412	183.236	2.56459
547.508	188.962	2.56459
549.06	194.775	2.61581
550.917	200.504	2.61581
552.973	200.504	2.61581
553.037	206.232	2.61581
555.085	206.325	2.66704
555.597	212.056	2.66704
557.597	212.056	2.66704
559.133	217.885	2.71827
561.189	217.885	2.71827
562.669	223.719	2.76949
564.716	223.719	2.76949
565.868	229.558	2.82072
567.916	229.456	2.76949
569.709	235.297	2.82072
571.765	235.403	2.87195
573.813	235.403	2.87195
575.861	235.403	2.87195
576.565	241.144	2.87195
578.565	241.036	2.82072
580.613	241.253	2.92317
582.66	241.253	2.92317
583.3	247.108	2.9744
585.348	247.108	2.9744
587.333	252.968	3.02562
589.333	252.854	2.9744
591.389	258.717	3.02562
593.437	258.717	3.02562
595.485	264.466	3.02562
597.533	264.704	3.12808
599.452	270.459	3.12808
601.508	270.459	3.12808
602.212	276.213	3.12808
604.261	276.213	3.12808
605.093	281.967	3.12808
607.141	281.967	3.12808
608.549	287.981	3.23053
610.549	287.981	3.23053
611.317	293.741	3.23053
613.325	293.741	3.23053
613.389	299.5	3.23053
615.317	305.26	3.23053
617.38	305.26	3.23053
617.508	311.159	3.28176
619.508	311.159	3.28176
619.636	316.779	3.23053
621.309	322.684	3.28176
623.117	328.446	3.28176
625.133	328.298	3.23053
625.397	334.359	3.33298
627.445	334.209	3.28176
627.637	340.124	3.33298
629.493	345.733	3.28176
631.221	351.812	3.38421
633.157	357.418	3.33298
635.204	363.347	3.38421
637.148	369.281	3.43543
639.157	369.281	3.43543
639.285	375.05	3.43543
641.285	375.05	3.43543
642.565	380.821	3.43543
644.565	380.821	3.43543
645.653	386.765	3.48666
647.325	392.538	3.48666
649.005	398.31	3.48666
650.549	404.083	3.48666
652.588	409.855	3.48666
654.316	416.004	3.58911
656.045	421.591	3.53789
658.093	421.591	3.53789
658.221	427.366	3.53789
660.269	427.559	3.58911
660.461	433.337	3.58911
662.125	439.115	3.58911
663.917	445.094	3.64034
665.653	450.874	3.64034
667.445	456.654	3.64034
669.172	462.435	3.64034
670.964	468.215	3.64034
673.021	468.215	3.64034
673.277	473.996	3.64034
675.277	473.996	3.64034
675.469	479.993	3.69157
677.133	485.556	3.64034
678.861	491.559	3.69157
680.861	491.337	3.64034
680.989	497.342	3.69157
683.037	497.117	3.64034
683.421	503.125	3.69157
685.34	509.138	3.74279
687.276	514.924	3.74279
689.276	514.691	3.69157
689.788	520.945	3.79402
691.837	520.71	3.74279
692.413	526.734	3.79402
694.293	532.521	3.79402
696.149	537.823	3.69157
698.133	543.852	3.74279
700.053	549.886	3.79402
701.909	555.675	3.79402
703.7	561.463	3.79402
705.748	561.463	3.79402
706.068	567.508	3.84524
708.125	567.251	3.79402
708.381	573.299	3.84524
710.189	578.828	3.79402
711.989	584.616	3.79402
714.037	584.881	3.84524
714.101	590.671	3.84524
716.157	590.671	3.84524
716.541	596.462	3.84524
718.589	602.253	3.84524
720.645	602.253	3.84524
720.773	608.044	3.84524
722.82	608.319	3.89647
724.42	613.835	3.84524
726.421	613.835	3.84524
727.829	619.626	3.84524
729.885	619.907	3.89647
730.077	625.7	3.89647
732.125	625.7	3.89647
732.637	631.208	3.84524
734.685	631.78	3.9477
735.389	637.575	3.9477
737.445	637.287	3.89647
738.085	643.08	3.89647
740.14	643.08	3.89647
740.716	648.874	3.89647
742.772	649.168	3.9477
743.613	654.667	3.89647
745.669	654.964	3.9477
747.269	660.76	3.9477
749.317	660.76	3.9477
750.213	666.557	3.9477
752.077	672.352	3.9477
753.997	678.456	3.99892
755.852	684.565	4.05015
757.772	689.741	3.9477
759.444	695.852	3.99892
761.301	701.969	4.05015
762.781	707.77	4.05015
763.941	713.572	4.05015
764.909	719.373	4.05015
765.677	725.175	4.05015
766.525	730.976	4.05015
767.301	736.777	4.05015
768.269	742.579	4.05015
769.109	748.38	4.05015
769.949	754.524	4.10137
770.789	760.328	4.10137
771.629	765.784	4.05015
772.469	771.936	4.10137
773.245	777.739	4.10137
774.084	783.899	4.1526
774.86	789.348	4.10137
775.7	795.512	4.1526
776.54	801.319	4.1526
777.308	807.126	4.1526
778.149	812.932	4.1526
779.109	818.739	4.1526
779.949	824.92	4.20383
780.781	830.352	4.1526
781.621	836.539	4.20383
782.453	841.966	4.1526
783.285	848.157	4.20383
784.189	853.967	4.20383
785.085	859.776	4.20383
785.997	865.978	4.25505
786.829	871.79	4.25505
787.661	877.602	4.25505
788.565	883.414	4.25505
789.461	889.226	4.25505
790.364	895.038	4.25505
791.268	900.85	4.25505
792.18	907.073	4.30628
793.076	912.474	4.25505
793.972	918.702	4.30628
794.804	924.937	4.3575
795.709	930.755	4.3575
796.733	936.146	4.30628
797.629	942.389	4.3575
798.533	948.207	4.3575
799.437	954.023	4.3575
800.469	959.841	4.3575
801.437	965.219	4.30628
802.213	971.475	4.3575
803.301	977.293	4.3575
804.333	983.109	4.3575
805.229	989.377	4.40873
806.149	994.744	4.3575
807.173	1001.02	4.40873
808.14	1006.84	4.40873
809.108	1012.66	4.40873
810.012	1018.48	4.40873
811.172	1024.3	4.40873
812.404	1030.58	4.45996
813.557	1036.41	4.45996
814.581	1042.23	4.45996
815.541	1048.05	4.45996
816.509	1053.87	4.45996
817.405	1059.7	4.45996
818.237	1065.52	4.45996
819.333	1071.83	4.51118
820.301	1077.65	4.51118
821.517	1082.99	4.45996
822.797	1089.3	4.51118
824.213	1094.63	4.45996
825.317	1100.96	4.51118
826.34	1106.78	4.51118
827.428	1113.62	4.61364
828.468	1118.94	4.56241
829.436	1124.77	4.56241
830.461	1130.6	4.56241
831.685	1136.94	4.61364
832.837	1142.25	4.56241
834.189	1148.6	4.61364
835.469	1154.43	4.61364
836.645	1159.73	4.56241
837.869	1166.09	4.61364
839.221	1171.92	4.61364
840.501	1178.29	4.66486
841.725	1183.58	4.61364
843.277	1189.96	4.66486
844.684	1195.25	4.61364
845.972	1201.62	4.66486
847.252	1207.46	4.66486
848.805	1214.4	4.76731
850.469	1219.68	4.71609
852.469	1219.12	4.66486
853.365	1224.96	4.66486
855.413	1225.51	4.71609
856.565	1227.19	4.86977
856.629	1221.91	4.92099
856.693	1210.21	4.92099
856.765	1198.52	4.92099
856.829	1182.06	5.02344
856.893	1169.29	4.92099
856.957	1158.12	4.97222
857.021	1145.9	4.92099
857.117	1134.73	4.97222
857.181	1123.03	4.97222
857.245	1111.84	5.02344
857.309	1099.63	4.97222
857.373	1087.94	4.97222
857.437	1076.24	4.97222
857.501	1064.05	4.92099
857.565	1046.99	4.97222
857.629	1034.82	4.92099
857.693	1023.59	4.97222
857.765	1011.9	4.97222
857.829	1000.2	4.97222
857.893	988.5	4.97222
857.957	977.249	5.02344
858.029	965.987	5.07467
858.101	953.406	4.97222
858.165	942.138	5.02344
858.229	930.434	5.02344
858.293	918.311	4.97222
858.357	901.175	5.02344
858.429	889.472	5.02344
858.493	877.768	5.02344
858.557	866.064	5.02344
858.621	854.361	5.02344
858.685	841.888	4.92099
858.757	830.574	4.97222
858.821	818.876	4.97222
858.885	807.547	5.02344
858.949	795.843	5.02344
859.013	784.139	5.02344
859.085	772.436	5.02344
859.149	754.88	5.02344
859.213	743.177	5.02344
859.277	731.474	5.02344
859.341	719.77	5.02344
859.413	707.743	4.97222
859.477	696.363	5.02344
859.541	684.346	4.97222
859.605	672.956	5.02344
859.669	660.95	4.97222
859.741	649.548	5.02344
859.813	637.845	5.02344
859.877	620.006	4.97222
859.941	608.308	4.97222
860.005	596.882	5.02344
860.077	585.179	5.02344
860.141	573.475	5.02344
860.204	561.772	5.02344
860.269	550.068	5.02344
860.333	538.118	4.97222
860.405	526.661	5.02344
860.469	514.957	5.02344
860.532	503.484	5.07467
860.597	485.699	5.02344
860.66	473.995	5.02344
860.733	462.503	5.07467
860.797	450.588	5.02344
860.861	438.884	5.02344
860.925	427.18	5.02344
860.988	415.477	5.02344
861.061	403.773	5.02344
861.125	392.07	5.02344
861.188	380.366	5.02344
861.252	368.662	5.02344
861.316	351.268	5.07467
861.388	339.404	5.02344
861.452	327.7	5.02344
861.516	316.141	5.07467
861.588	304.293	5.02344
861.652	292.723	5.07467
861.724	281.014	5.07467
861.788	269.305	5.07467
861.852	257.478	5.02344
861.916	245.775	5.02344
861.98	228.428	5.1259
862.052	216.615	5.07467
862.116	204.813	5.02344
862.18	193.109	5.02344
862.244	181.405	5.02344
862.308	169.779	5.07467
862.38	157.998	5.02344
862.444	146.294	5.02344
862.508	134.652	5.07467
862.572	122.944	5.07467
862.636	105.38	5.07467
862.708	93.6286	5.02344
862.772	81.9621	5.07467
862.836	70.2212	5.02344
862.9	58.5445	5.07467
862.964	46.7929	4.97222
863.036	35.1263	5.07467
863.1	23.4176	5.07467
863.164	11.7088	5.07467
863.228	5.85141	5.02344
865.237	5.85409	5.07467
867.293	5.85409	5.07467
869.293	5.85677	5.1259
871.357	5.85677	5.1259
873.357	11.7195	5.17712
875.405	11.7195	5.17712
877.453	11.7195	5.17712
878.284	17.5795	5.17712
880.284	17.5876	5.22835
882.34	17.5876	5.22835
884.389	17.5957	5.27957
886.445	17.5957	5.27957
888.501	17.5957	5.27957
890.501	17.5957	5.27957
892.509	17.5957	5.27957
894.557	17.5957	5.27957
896.604	17.5957	5.27957
897.5	23.4712	5.3308
898.02	17.6037	5.3308
898.796	23.4712	5.3308
900.853	23.4712	5.3308
902.901	23.482	5.38203
904.949	23.482	5.38203
907.005	23.482	5.38203
909.053	23.4928	5.43325
911.101	23.4928	5.43325
913.156	23.4928	5.43325
915.212	23.5035	5.48448
917.268	23.5035	5.48448
919.317	23.5251	5.58693
919.445	29.3932	5.53571
919.509	23.5251	5.58693
919.637	29.3932	5.53571
921.685	29.3932	5.53571
923.741	29.3932	5.53571
925.797	29.4202	5.63816
927.845	29.4067	5.58693
929.893	29.4202	5.63816
931.948	29.4202	5.63816
933.996	29.4338	5.68939
936.053	29.4473	5.74061
938.101	29.4338	5.68939
938.229	35.3202	5.68939
940.277	35.3364	5.74061
942.333	35.3364	5.74061
942.781	41.2451	5.79184
944.805	41.2451	5.79184
945.005	47.1375	5.79184
947.061	47.1375	5.79184
947.253	53.0049	5.74061
949.316	53.0293	5.79184
951.156	58.9217	5.79184
953.157	58.9488	5.84306
955.213	58.9488	5.84306
956.365	64.8738	5.89429
958.421	64.844	5.84306
960.469	64.8738	5.89429
962.517	64.8738	5.89429
962.837	70.7711	5.89429
964.853	70.7711	5.89429
966.908	70.8037	5.94551
968.956	70.869	6.04797
971.005	70.7711	5.89429
973.061	70.8363	5.99674
975.109	70.8363	5.99674
977.133	70.8363	5.99674
979.141	76.775	6.04797
981.197	76.8104	6.09919
983.253	76.8104	6.09919
985.308	76.8104	6.09919
987.356	76.8104	6.09919
989.413	76.8104	6.09919
991.437	76.8814	6.20165
993.485	76.8459	6.15042
995.501	76.8459	6.15042
997.549	76.8459	6.15042
999.573	76.8814	6.20165
1001.63	76.8459	6.15042
1003.63	76.8814	6.20165
1005.68	76.9169	6.25287
1007.68	76.8814	6.20165
1009.73	76.8814	6.20165
1011.73	76.9169	6.25287
1013.79	76.9169	6.25287
1015.84	76.9169	6.25287
1017.91	76.9169	6.25287
1019.92	76.9524	6.3041
1021.96	76.9169	6.25287
1024.02	76.9524	6.3041
1026.08	76.9524	6.3041
1028.08	76.9169	6.25287
1030.13	76.9524	6.3041
1031.34	82.8715	6.3041
1033.4	82.8715	6.3041
1035.4	82.8715	6.3041
1037.46	82.8715	6.3041
1039.46	82.8715	6.3041
1041.46	82.8715	6.3041
1043.51	82.8715	6.3041
1045.56	82.9098	6.35532
1047.56	82.9098	6.35532
1049.61	82.9098	6.35532
1051.66	82.9098	6.35532
1053.72	82.9482	6.40655
1055.72	82.9866	6.45778
1057.73	82.9866	6.45778
1059.74	82.9866	6.45778
1061.74	83.025	6.509
1063.8	83.1019	6.61146
1065.85	83.0634	6.56023
1067.9	83.1019	6.61146
1069.95	83.1405	6.66268
1071.99	83.1405	6.66268
1072.63	77.2022	6.66268
1074.68	77.2022	6.66268
1076.72	77.2739	6.76513
1078.75	77.2739	6.76513
1080.8	77.3816	6.91881
1080.99	83.295	6.86759
1083.04	83.295	6.86759
1085.08	83.3337	6.91881
1087.13	83.3724	6.97004
1087.84	77.3457	6.86759
1089.84	77.4176	6.97004
1091.85	77.4176	6.97004
1093.86	77.4176	6.97004
1095.92	77.4176	6.97004
1097.97	77.4536	7.02126
1100.02	77.4897	7.07249
1100.08	83.4112	7.02126
1102.08	83.45	7.07249
1103.18	89.411	7.07249
1104.81	95.372	7.07249
1105.98	101.332	7.07249
1107.21	107.343	7.12372
1108.45	113.36	7.17494
1109.68	119.27	7.12372
1111.24	125.292	7.17494
1112.93	131.258	7.17494
1114.85	137.225	7.17494
1116.91	143.258	7.22617
1118.96	143.325	7.2774
1119.09	149.296	7.2774
1121.09	149.296	7.2774
1123.02	155.341	7.32862
1125.07	155.341	7.32862
1127.08	155.341	7.32862
1127.41	161.316	7.32862
1129.46	161.391	7.37985
1131.52	161.391	7.37985
1132.48	167.368	7.37985
1134.48	167.446	7.43107
1136.48	167.446	7.43107
1137.44	173.346	7.37985
1139.49	173.427	7.43107
1141.55	173.508	7.4823
1143.6	173.508	7.4823
1144.12	179.658	7.58475
1146.17	179.574	7.53353
1148.22	179.574	7.53353
1149.24	185.473	7.4823
1151.25	185.647	7.58475
1153.31	185.647	7.58475
1155.36	185.647	7.58475
1155.62	191.636	7.58475
1157.68	191.725	7.63598
1159.74	191.905	7.73843
1160.44	197.716	7.63598
1162.46	197.809	7.6872
1164.51	197.901	7.73843
1166.56	197.901	7.73843
1167.95	203.899	7.73843
1169.95	203.994	7.78966
1171.1	209.994	7.78966
1172.72	215.994	7.78966
1174.13	222.098	7.84088
1175.35	216.196	7.89211
1175.55	210.191	7.89211
1175.74	204.09	7.84088
1175.94	198.273	7.94334
1176.13	192.265	7.94334
1176.33	186.256	7.94334
1176.53	180.248	7.94334
1176.72	174.24	7.94334
1176.92	168.231	7.94334
1177.12	162.223	7.94334
1177.31	156.215	7.94334
1177.44	150.206	7.94334
1177.63	144.131	7.89211
1177.83	138.19	7.94334
1178.03	132.182	7.94334
1178.23	126.115	7.89211
1178.36	120.165	7.94334
1178.56	114.157	7.94334
1178.75	108.149	7.94334
1178.95	102.14	7.94334
1179.08	96.1324	7.94334
1179.28	90.1239	7.94334
1179.47	84.1548	7.99456
1179.66	78.1075	7.94334
1179.86	72.099	7.94334
1179.99	66.1221	7.99456
1180.19	60.0826	7.94334
1180.38	54.0994	7.99456
1180.52	48.0662	7.94334
1180.71	42.0774	7.99456
1180.91	36.0661	7.99456
1181.11	30.0554	7.99456
1181.24	24.0441	7.99456
1181.43	18.0334	7.99456
1181.62	12.0164	7.94334
1181.81	6.01071	7.99456
1183.87	6.01071	7.99456
1184.44	12.022	7.99456
1186.49	12.0277	8.04579
1187.28	18.0418	8.04579
1188.62	24.0441	7.99456
1189.72	30.0836	8.09702
1190.69	36.1	8.09702
1191.6	42.1367	8.14824
1192.62	48.1791	8.19947
1193.71	54.2012	8.19947
1194.61	60.2521	8.25069
1195.71	66.2464	8.19947
1196.8	72.2684	8.19947
1198.03	78.291	8.19947
1199.12	84.313	8.19947
1200.41	90.3781	8.25069
1201.94	96.4036	8.25069
1203.53	102.428	8.25069
1205.13	108.454	8.25069
1206.61	114.533	8.30192
1208.21	120.618	8.35314
1209.95	126.649	8.35314
1211.75	132.742	8.40437
1213.8	132.804	8.4556
1214.06	138.776	8.40437
1216.12	138.907	8.50682
1216.31	144.878	8.4556
1218.31	144.878	8.4556
1218.56	151.056	8.55805
1220.56	150.914	8.4556
1222.56	150.985	8.50682
1224.61	151.056	8.55805
1226.67	151.128	8.60928
1227.7	145.083	8.60928
1228.03	139.038	8.60928
1228.41	132.992	8.60928
1228.8	126.947	8.60928
1229.25	120.959	8.6605
1229.64	114.857	8.60928
1230.03	108.863	8.6605
1230.41	102.815	8.6605
1230.86	96.7676	8.6605
1231.33	90.7194	8.6605
1231.79	84.6712	8.6605
1232.24	78.6236	8.6605
1232.69	72.5754	8.6605
1233.2	66.4964	8.60928
1233.72	60.5081	8.71173
1233.98	66.5278	8.6605
1234.96	72.6096	8.71173
1236.12	78.6236	8.6605
1237.15	84.7111	8.71173
1238.49	90.7622	8.71173
1239.71	96.8133	8.71173
1241.63	102.912	8.76296
1243.56	108.966	8.76296
1245.5	115.074	8.81418
1247.32	121.131	8.81418
1249.13	127.248	8.8654
1251.13	127.187	8.81418
1251.71	133.244	8.81418
1253.77	133.307	8.8654
1254.73	139.3	8.81418
1256.78	139.366	8.8654
1257.74	145.426	8.8654
1259.79	145.426	8.8654
1261.2	151.557	8.91663
1263.25	151.557	8.91663
1265.31	151.628	8.96786
1267.36	151.7	9.01908
1269.41	151.7	9.01908
1271.46	151.7	9.01908
1273.51	151.772	9.07031
1275.56	151.772	9.07031
1275.81	145.701	9.07031
1277.48	139.63	9.07031
1279.2	133.622	9.12154
1281.26	133.622	9.12154
1283.31	133.686	9.17276
1285.36	133.622	9.12154
1287.41	133.686	9.17276
1289.45	133.686	9.17276
1290.48	139.763	9.17276
1292.53	139.829	9.22399
1294.39	145.909	9.22399
1296.44	145.978	9.27522
1298.49	146.047	9.32644
1300.54	146.047	9.32644
1301.69	139.895	9.27522
1303.74	140.028	9.37767
1305.79	140.095	9.4289
1305.85	133.94	9.37767
1307.9	134.003	9.4289
1309.95	134.003	9.4289
1312	134.003	9.4289
1314.05	134.067	9.48012
1316.09	134.067	9.48012
1316.35	140.161	9.48012
1316.48	134.067	9.48012
1316.67	140.161	9.48012
1318.72	140.228	9.53135
1320.77	140.228	9.53135
1322.81	140.295	9.58257
1324.09	134.195	9.58257
1325.18	140.295	9.58257
1325.37	134.195	9.58257
1325.63	140.361	9.6338
1325.69	134.195	9.58257
1326.08	140.361	9.6338
1326.14	134.195	9.58257
1326.46	140.295	9.58257
1327.36	134.259	9.6338
1327.42	140.295	9.58257
1327.56	134.195	9.58257
1327.63	140.361	9.6338
1328.97	134.195	9.58257
1329.43	140.428	9.68502
1330.71	134.259	9.6338
1331.22	140.361	9.6338
1331.74	134.259	9.6338
1331.81	140.361	9.6338
1331.87	134.259	9.6338
1331.93	140.361	9.6338
1333.08	134.259	9.6338
1335.13	134.322	9.68502
1337.18	134.322	9.68502
1339.23	134.322	9.68502
1341.29	134.386	9.73625
1343.36	134.386	9.73625
1345.41	134.386	9.73625
1347.46	134.45	9.78748
1349.51	134.386	9.73625
1351.56	134.45	9.78748
1353.61	134.45	9.78748
1355.61	134.515	9.8387
1357.66	134.579	9.88993
1359.71	134.643	9.94116
1361.76	134.579	9.88993
1363.76	134.643	9.94116
1365.81	134.707	9.99238
1367.86	134.643	9.94116
1368.76	128.523	9.94116
1370.8	128.523	9.94116
1372.85	128.646	10.0436
1374.9	128.585	9.99238
1376.95	128.585	9.99238
1379	128.646	10.0436
1379.38	134.707	9.99238
1381.43	134.772	10.0436
1383.48	134.707	9.99238
1385.52	134.772	10.0436
1385.97	140.965	10.0948
1388.02	140.965	10.0948
1390.08	140.898	10.0436
1392.13	140.898	10.0436
1394.18	140.965	10.0948
1396.23	140.965	10.0948
1398.28	141.033	10.1461
1398.41	134.901	10.1461
1400.45	135.03	10.2485
1402.5	135.03	10.2485
1404.55	134.965	10.1973
1406.47	128.892	10.2485
1408.53	128.831	10.1973
1410.57	128.892	10.2485
1412.56	135.03	10.2485
1414.6	135.03	10.2485
1416.66	135.094	10.2997
1418.71	135.094	10.2997
1420.76	135.159	10.351
1422.8	135.159	10.351
1424.85	135.224	10.4022
1426.91	135.224	10.4022
1428.96	135.289	10.4534
1429.15	129.078	10.4022
1429.66	135.224	10.4022
1431.72	135.224	10.4022
1433.77	135.289	10.4534
1435.82	135.289	10.4534
1437.87	135.289	10.4534
1438.83	129.14	10.4534
1440.88	129.14	10.4534
1441.84	135.289	10.4534
1443.84	135.289	10.4534
1445.89	135.354	10.5046
1446.01	129.201	10.5046
1448.07	129.201	10.5046
1450.12	129.201	10.5046
1452.17	129.263	10.5559
1454.22	129.326	10.6071
1456.27	129.263	10.5559
1458.32	129.263	10.5559
1460.36	129.263	10.5559
1462.41	129.263	10.5559
1464.47	129.326	10.6071
1466.53	129.326	10.6071
1467.81	135.483	10.6071
1469.85	135.549	10.6583
1471.9	135.549	10.6583
1473.95	135.483	10.6071
1476	135.549	10.6583
1478.05	135.549	10.6583
1480.09	135.549	10.6583
1482.09	135.549	10.6583
1484.14	135.549	10.6583
1486.19	135.549	10.6583
1488.24	135.614	10.7096
1490.28	135.614	10.7096
1492.28	135.614	10.7096
1494.34	135.679	10.7608
1496.39	135.679	10.7608
1498.48	135.679	10.7608
1500.53	135.679	10.7608
1502.45	129.574	10.812
1504.5	129.574	10.812
1506.55	129.574	10.812
1508.6	129.574	10.812
1510.64	129.574	10.812
1512.69	129.637	10.8632
1514.74	129.637	10.8632
1516.79	129.637	10.8632
1518.84	129.699	10.9145
1520.89	129.699	10.9145
1522.94	129.762	10.9657
1524.99	129.762	10.9657
1527.04	129.824	11.0169
1529.08	129.762	10.9657
1531.08	129.699	10.9145
1533.09	129.824	11.0169
1535.14	129.824	11.0169
1537.19	129.824	11.0169
1539.24	129.887	11.0681
1541.29	129.824	11.0169
1543.34	129.887	11.0681
1545.39	129.887	11.0681
1547.44	129.887	11.0681
1549.48	129.887	11.0681
1551.53	129.949	11.1194
1553.58	129.949	11.1194
1555.63	129.949	11.1194
1557.69	129.949	11.1194
1559.73	129.949	11.1194
1561.78	129.949	11.1194
1563.25	136.268	11.2218
1565.25	136.268	11.2218
1567.25	136.334	11.273
1569.3	136.334	11.273
1571.35	136.334	11.273
1572.01	130.138	11.273
1574.05	130.201	11.3243
1576.05	130.263	11.3755
1578.06	130.263	11.3755
1580.12	130.326	11.4267
1582.17	130.326	11.4267
1584.17	130.39	11.4779
1586.21	130.516	11.5804
1588.26	130.453	11.5292
1590.31	130.39	11.4779
1592.36	130.516	11.5804
1594.41	130.516	11.5804
1596.47	130.579	11.6316
1598.52	130.642	11.6828
1600.18	124.421	11.6828
1602.23	124.481	11.7341
1604.25	124.481	11.7341
1606.3	124.481	11.7341
1608.35	124.542	11.7853
1610.4	124.481	11.7341
1612.45	124.542	11.7853
1614.5	124.663	11.8878
1616.55	124.663	11.8878
1618.6	124.663	11.8878
1620.65	124.663	11.8878
1622.7	124.784	11.9902
1624.75	124.723	11.939
1626.75	124.784	11.9902
1628.8	124.784	11.9902
1630.84	124.845	12.0414
1632.89	124.845	12.0414
1634.94	124.905	12.0927
1636.67	131.151	12.0927
1636.81	124.905	12.0927
1636.87	131.151	12.0927
1638.93	131.151	12.0927
1640.97	131.151	12.0927
1643.02	131.215	12.1439
1644.62	124.966	12.1439
1644.75	131.343	12.2463
1645.27	124.966	12.1439
1647.32	125.027	12.1951
1648.86	131.279	12.1951
1648.99	125.027	12.1951
1649.64	131.215	12.1439
1649.7	125.027	12.1951
1650.08	131.343	12.2463
1650.28	125.027	12.1951
1650.47	131.279	12.1951
1651.17	125.027	12.1951
1652.15	131.279	12.1951
1652.21	125.088	12.2463
1652.28	131.279	12.1951
1654.33	131.343	12.2463
1656.39	131.343	12.2463
1658.44	131.407	12.2976
1660.48	131.407	12.2976
1662.53	131.407	12.2976
1664.59	131.407	12.2976
1666.64	131.471	12.3488
1668.69	131.471	12.3488
1670.75	131.535	12.4
1672.75	131.535	12.4
1674.8	131.599	12.4512
1676.84	131.599	12.4512
1678.89	131.599	12.4512
1680.94	131.663	12.5025
1681.39	125.393	12.5025
1683.44	125.393	12.5025
1685.49	125.455	12.5537
1687.54	125.455	12.5537
1689.59	125.455	12.5537
1691.64	125.516	12.6049
1693.69	125.516	12.6049
1695.73	125.577	12.6561
1697.78	125.577	12.6561
1699.78	125.639	12.7074
1701.84	125.639	12.7074
1703.84	125.639	12.7074
1705.24	119.416	12.7586
1705.44	125.7	12.7586
1707.48	125.7	12.7586
1708.44	119.416	12.7586
1710.49	119.474	12.8098
1711.14	125.762	12.8098
1713.2	125.823	12.861
1715.2	125.823	12.861
1717.26	125.885	12.9123
1719.31	125.885	12.9123
1721.36	125.947	12.9635
1723.41	125.947	12.9635
1725.46	125.947	12.9635
1727.52	125.947	12.9635
1729.56	126.009	13.0147
1731.56	125.947	12.9635
1733.61	126.07	13.066
1735.66	126.07	13.066
1737.71	126.132	13.1172
1739.76	126.194	13.1684
1741.81	126.132	13.1172
1743.85	126.256	13.2196
1745.9	126.194	13.1684
1747.44	119.944	13.2196
1749.48	119.944	13.2196
1751.53	119.944	13.2196
1753.58	119.944	13.2196
1755.63	120.003	13.2709
1757.68	119.944	13.2196
1759.68	120.062	13.3221
1761.72	120.062	13.3221
1763.77	120.121	13.3733
1765.82	120.062	13.3221
1767.87	120.18	13.4245
1769.93	120.18	13.4245
1771.93	120.18	13.4245
1773.94	120.239	13.4758
1775.94	120.299	13.527
1777.94	120.239	13.4758
1779.99	120.299	13.527
1782.04	120.299	13.527
1784.08	120.299	13.527
1786.13	120.358	13.5782
1788.19	120.358	13.5782
1790.24	120.417	13.6294
1792.24	120.477	13.6807
1794.29	120.477	13.6807
1796.33	120.417	13.6294
1798.38	120.536	13.7319
