# Supplementary material for: A temperature- and stress-controlled failure criterion for ice-filledpermafrost rock joints
Source: Copernicus journal article supplement (doi:10.5194/tc-2018-57), 2018-03-28
Supplement: Supplementary file 1 [file tc-2018-57-supplement.zip › Suppl. material_Mamot et al/data_timeseries_shearmachine_exp6b_WSK_spec1_Fig. S3.xlsx]

## Sheet: Sheet1
time_sec	shear_stress_kPa	shear_deform_mm
0.085	0	0.00768341
0.901	5.67834	0.0435406
2.933	5.67659	0.00768341
4.965	5.67659	0.00768341
6.998	5.67659	0.00768341
9.038	5.67834	0.0435406
11.07	5.67834	0.0435406
13.101	5.67659	0.00768341
15.133	5.67834	0.0435406
17.165	5.67659	0.00768341
19.205	5.67659	0.00768341
21.237	5.67834	0.0435406
23.269	5.67659	0.00768341
25.302	5.67659	0.00768341
27.334	5.67909	0.0589104
29.374	5.67659	0.00768341
31.405	5.67834	0.0435406
33.445	5.67909	0.0589104
35.477	5.67659	0.00768341
37.509	5.67659	0.00768341
39.549	5.67909	0.0589104
41.581	5.67659	0.00768341
43.614	5.67834	0.0435406
45.646	5.67659	0.00768341
47.677	5.67659	0.00768341
49.717	5.67659	0.00768341
51.749	5.67659	0.00768341
53.797	5.67659	0.00768341
55.837	5.67659	0.00768341
57.869	5.67659	0.00768341
59.91	5.67659	0.00768341
61.942	5.67659	0.00768341
63.982	5.67834	0.0435406
66.013	5.67659	0.00768341
68.045	5.67659	0.00768341
70.085	5.67659	0.00768341
72.117	5.67659	0.00768341
74.149	5.67659	0.00768341
76.181	5.67659	0.00768341
78.214	5.67909	0.0589104
80.254	5.67659	0.00768341
82.294	5.67659	0.00768341
84.325	5.67834	0.0435406
86.357	5.67834	0.0435406
88.389	5.67909	0.0589104
90.429	5.67659	0.00768341
92.461	5.67659	0.00768341
94.486	5.67659	0.00768341
96.518	5.67834	0.0435406
98.55	5.67659	0.00768341
100.589	5.67659	0.00768341
102.629	5.67659	0.00768341
104.661	5.67834	0.0435406
106.677	5.67659	0.00768341
108.677	5.67659	0.00768341
110.725	5.67659	0.00768341
112.774	5.67909	0.0589104
114.822	5.67909	0.0589104
116.87	5.67659	0.00768341
118.917	5.67659	0.00768341
120.965	5.67659	0.00768341
123.021	5.67659	0.00768341
125.069	5.67659	0.00768341
127.117	5.67659	0.00768341
129.165	5.67659	0.00768341
131.214	5.67659	0.00768341
133.262	5.67659	0.00768341
135.309	5.67909	0.0589104
137.357	5.67659	0.00768341
139.405	5.67659	0.00768341
141.453	5.67659	0.00768341
143.509	5.67659	0.00768341
145.565	5.67659	0.00768341
147.614	5.67659	0.00768341
149.662	5.67659	0.00768341
151.71	5.67834	0.0435406
153.757	5.67659	0.00768341
155.805	5.67659	0.00768341
157.853	5.67659	0.00768341
159.901	5.67659	0.00768341
161.949	5.67659	0.00768341
163.949	5.67659	0.00768341
165.998	5.67659	0.00768341
168.046	5.67659	0.00768341
170.093	5.67659	0.00768341
172.141	5.67659	0.00768341
174.189	5.67659	0.00768341
176.237	5.67909	0.0589104
178.285	5.67659	0.00768341
180.333	5.67659	0.00768341
182.382	5.67834	0.0435406
184.43	5.67834	0.0435406
186.478	5.67659	0.00768341
188.525	5.67659	0.00768341
190.581	5.67834	0.0435406
192.629	5.67659	0.00768341
194.677	5.67659	0.00768341
196.725	5.67659	0.00768341
198.773	5.67659	0.00768341
200.822	5.67834	0.0435406
202.878	5.67659	0.00768341
204.925	5.67659	0.00768341
206.981	5.67659	0.00768341
209.029	5.67659	0.00768341
211.077	5.67659	0.00768341
213.125	5.67834	0.0435406
215.173	5.67659	0.00768341
217.222	5.67834	0.0435406
219.278	5.67659	0.00768341
221.326	5.67659	0.00768341
223.373	5.67659	0.00768341
225.421	5.67834	0.0435406
227.469	5.67659	0.00768341
229.525	5.67659	0.00768341
231.573	5.67659	0.00768341
233.621	5.67659	0.00768341
235.67	5.67834	0.0435406
237.718	5.67659	0.00768341
239.766	5.67659	0.00768341
241.813	5.67834	0.0435406
243.869	5.67659	0.00768341
245.917	5.67659	0.00768341
247.965	5.67659	0.00768341
250.013	5.67909	0.0589104
252.062	5.67659	0.00768341
254.11	5.67659	0.00768341
256.158	5.67659	0.00768341
258.205	5.67909	0.0589104
260.253	5.67834	0.0435406
262.301	5.67659	0.00768341
264.349	5.67659	0.00768341
266.397	5.67659	0.00768341
268.445	5.67659	0.00768341
270.494	5.67659	0.00768341
272.542	5.67659	0.00768341
274.598	5.67659	0.00768341
276.645	5.67834	0.0435406
278.693	5.67659	0.00768341
280.741	5.67659	0.00768341
282.797	5.67659	0.00768341
284.845	5.67834	0.0435406
286.894	5.67659	0.00768341
288.942	5.67659	0.00768341
290.99	5.67659	0.00768341
293.037	5.67834	0.0435406
295.085	5.67659	0.00768341
297.133	5.67659	0.00768341
299.181	5.67659	0.00768341
301.237	5.67909	0.0589104
303.293	5.67659	0.00768341
305.342	5.67659	0.00768341
307.39	5.67659	0.00768341
309.437	5.67659	0.00768341
311.485	5.67659	0.00768341
313.533	5.67834	0.0435406
315.581	5.67834	0.0435406
317.629	5.67659	0.00768341
319.677	5.67659	0.00768341
321.726	5.67659	0.00768341
323.782	5.67909	0.0589104
325.83	5.67659	0.00768341
327.877	5.67659	0.00768341
329.933	5.67659	0.00768341
331.981	5.67659	0.00768341
334.029	5.67909	0.0589104
336.077	5.67659	0.00768341
338.125	5.67659	0.00768341
340.174	5.67909	0.0589104
342.222	5.67659	0.00768341
344.27	5.67834	0.0435406
346.317	5.67834	0.0435406
348.365	5.67659	0.00768341
350.413	5.67659	0.00768341
352.461	5.67909	0.0589104
354.509	5.67659	0.00768341
356.558	5.67909	0.0589104
358.606	5.67659	0.00768341
360.654	5.67909	0.0589104
362.709	5.67659	0.00768341
364.757	5.67909	0.0589104
366.805	5.67834	0.0435406
368.853	5.67659	0.00768341
370.901	5.67659	0.00768341
372.949	5.67834	0.0435406
374.998	5.67834	0.0435406
377.046	5.67909	0.0589104
379.094	5.67659	0.00768341
381.141	5.67659	0.00768341
383.189	5.67834	0.0435406
385.245	5.67834	0.0435406
387.293	5.67659	0.00768341
389.341	5.67659	0.00768341
391.389	5.67659	0.00768341
393.438	5.67834	0.0435406
393.758	11.3623	0.0947676
395.806	11.3623	0.0947676
395.934	17.0437	0.0947676
397.341	22.7246	0.0947676
398.365	28.4185	0.145994
399.453	34.1019	0.145994
400.477	39.8034	0.197221
401.565	45.5099	0.248447
402.861	51.1757	0.197221
404.909	51.1983	0.248447
404.973	56.8872	0.248447
407.021	56.9124	0.299673
409.07	56.9124	0.299673
411.118	56.9124	0.299673
413.166	56.9375	0.350898
415.213	56.9627	0.402125
417.261	56.9879	0.453351
419.309	56.9879	0.453351
421.357	57.0131	0.504577
423.413	57.0131	0.504577
425.461	57.0384	0.555804
426.55	62.7702	0.60703
428.606	62.7425	0.555804
428.99	68.4459	0.555804
430.598	74.1829	0.60703
431.95	79.8889	0.60703
433.237	85.6334	0.658255
434.453	91.3425	0.658255
436.005	97.0511	0.658255
437.413	102.851	0.760708
438.565	108.517	0.709481
439.909	114.229	0.709481
441.389	119.94	0.709481
442.685	125.651	0.709481
444.542	131.421	0.760708
446.414	137.135	0.760708
448.302	142.912	0.811934
450.325	142.849	0.760708
450.773	148.695	0.863161
452.821	148.695	0.863161
453.205	154.414	0.863161
455.125	160.204	0.914387
457.045	165.852	0.863161
459.093	165.926	0.914387
459.285	171.8	1.01684
461.333	171.723	0.965612
461.526	177.369	0.914387
463.518	183.172	0.965612
465.574	183.254	1.01684
465.646	188.98	1.01684
467.701	188.98	1.01684
469.045	194.707	1.01684
471.093	194.793	1.06806
472.053	200.523	1.06806
474.109	200.612	1.11929
474.365	206.343	1.11929
476.413	206.343	1.11929
476.605	212.075	1.11929
478.653	212.075	1.11929
479.422	217.807	1.11929
481.478	217.904	1.17052
481.99	223.638	1.17052
483.934	229.373	1.17052
485.797	235.212	1.22174
487.845	235.212	1.22174
488.165	241.056	1.27297
490.221	241.056	1.27297
490.413	246.686	1.22174
492.141	252.647	1.32419
493.677	258.39	1.32419
495.341	264.131	1.32419
496.942	269.873	1.32419
498.614	275.616	1.32419
500.406	281.483	1.37542
502.325	287.227	1.37542
504.373	292.972	1.37542
506.181	298.716	1.37542
507.781	304.597	1.42665
509.445	310.344	1.42665
511.173	316.091	1.42665
512.773	321.982	1.47787
514.566	327.878	1.5291
516.238	333.63	1.5291
517.966	339.383	1.5291
519.573	345.289	1.58033
521.117	350.887	1.5291
522.813	356.639	1.5291
524.485	362.391	1.5291
526.125	368.308	1.58033
527.933	374.063	1.58033
529.933	374.063	1.58033
530.637	379.818	1.58033
532.694	379.818	1.58033
533.782	385.573	1.58033
535.51	391.502	1.63155
537.262	397.26	1.63155
538.805	403.197	1.68278
540.541	408.774	1.63155
542.285	414.717	1.68278
543.949	420.665	1.734
546.005	420.665	1.734
546.773	426.428	1.734
548.83	426.428	1.734
549.35	432.191	1.734
551.142	438.345	1.83646
552.998	443.914	1.78523
554.853	449.679	1.78523
556.837	455.648	1.83646
558.701	461.21	1.78523
560.629	467.183	1.83646
562.629	467.183	1.83646
563.461	472.951	1.83646
565.509	473.163	1.88768
566.085	478.934	1.88768
568.134	484.704	1.88768
570.126	490.474	1.88768
572.174	490.694	1.93891
572.366	496.466	1.93891
574.413	496.466	1.93891
574.669	502.015	1.88768
576.469	508.013	1.93891
578.397	513.785	1.93891
580.397	514.015	1.99014
581.293	519.558	1.93891
583.349	519.558	1.93891
584.182	525.567	1.99014
586.038	531.342	1.99014
587.702	537.118	1.99014
589.558	542.893	1.99014
590.909	548.914	2.04136
592.389	554.693	2.04136
593.925	560.47	2.04136
595.397	566.249	2.04136
596.869	572.284	2.09259
598.405	578.323	2.14381
599.749	583.583	2.04136
601.037	589.625	2.09259
602.262	595.406	2.09259
603.542	601.457	2.14381
605.022	607.24	2.14381
606.302	613.023	2.14381
607.782	618.806	2.14381
609.317	624.589	2.14381
610.605	630.656	2.19504
612.013	636.441	2.19504
613.293	642.227	2.19504
614.637	647.723	2.14381
616.309	653.799	2.19504
618.117	659.585	2.19504
619.918	665.67	2.24627
621.59	671.458	2.24627
623.198	677.247	2.24627
624.733	683.035	2.24627
626.269	688.823	2.24627
627.805	694.612	2.24627
629.405	700.715	2.29749
631.197	706.189	2.24627
633.197	706.506	2.29749
633.325	712.298	2.29749
635.061	718.088	2.29749
636.598	723.879	2.29749
638.206	729.67	2.29749
639.806	735.461	2.29749
641.47	741.253	2.29749
643.261	747.379	2.34872
645.309	747.379	2.34872
646.333	753.173	2.34872
648.381	753.173	2.34872
649.085	758.967	2.34872
650.749	764.76	2.34872
652.349	770.554	2.34872
654.27	776.697	2.39995
656.326	776.697	2.39995
656.39	782.141	2.34872
658.118	788.29	2.39995
659.909	794.086	2.39995
661.957	794.443	2.45117
662.021	799.882	2.39995
664.077	800.242	2.45117
664.461	805.678	2.39995
666.253	811.84	2.45117
668.237	817.639	2.45117
670.221	823.067	2.39995
672.27	823.437	2.45117
672.47	829.236	2.45117
674.526	829.236	2.45117
674.59	835.035	2.45117
676.637	835.035	2.45117
676.901	840.834	2.45117
678.901	840.834	2.45117
679.925	846.633	2.45117
681.925	847.014	2.5024
683.029	852.816	2.5024
685.029	852.816	2.5024
685.157	858.617	2.5024
687.213	859.004	2.55362
687.277	864.419	2.5024
689.278	864.419	2.5024
689.854	869.828	2.45117
691.902	870.612	2.55362
692.542	876.021	2.5024
694.598	876.416	2.55362
694.853	881.823	2.5024
696.901	882.22	2.55362
697.477	887.624	2.5024
699.525	888.024	2.55362
701.573	888.024	2.55362
702.085	893.828	2.55362
704.133	893.828	2.55362
706.182	893.828	2.55362
706.31	899.633	2.55362
708.366	900.038	2.60485
708.942	895.038	2.7073
709.006	888.825	2.65608
709.07	877.998	2.75853
709.158	872.184	2.75853
709.222	860.555	2.75853
709.286	848.926	2.75853
709.35	843.111	2.75853
709.414	831.482	2.75853
709.486	825.667	2.75853
709.55	814.038	2.75853
709.614	808.224	2.75853
709.678	796.594	2.75853
709.742	790.78	2.75853
709.814	779.151	2.75853
709.878	773.336	2.75853
709.942	761.707	2.75853
710.006	755.893	2.75853
710.07	744.6	2.80975
710.142	738.449	2.75853
710.206	727.148	2.80975
710.27	715.514	2.80975
710.334	709.696	2.80975
710.398	697.747	2.75853
710.47	691.932	2.75853
710.534	680.611	2.80975
710.598	675.098	2.86098
710.67	663.159	2.80975
710.734	657.045	2.75853
710.806	645.416	2.75853
710.87	639.89	2.80975
710.934	627.972	2.75853
710.998	622.439	2.80975
711.062	610.804	2.80975
711.134	599.17	2.80975
711.198	593.621	2.86098
711.262	581.718	2.80975
711.326	575.901	2.80975
711.39	564.267	2.80975
711.462	558.198	2.75853
711.526	546.815	2.80975
711.59	540.998	2.80975
711.654	529.364	2.80975
711.718	523.547	2.80975
711.79	511.912	2.80975
711.854	506.095	2.80975
711.918	494.461	2.80975
711.981	482.826	2.80975
712.046	476.794	2.75853
712.118	465.165	2.75853
712.182	459.557	2.80975
712.246	447.923	2.80975
712.309	442.106	2.80975
712.374	430.472	2.80975
712.446	424.654	2.80975
712.509	413.02	2.80975
712.573	407.203	2.80975
712.637	395.39	2.75853
712.701	384.108	2.86098
712.773	378.117	2.80975
712.837	366.482	2.80975
712.901	360.665	2.80975
712.965	349.031	2.80975
713.029	343.214	2.80975
713.101	331.579	2.80975
713.165	325.762	2.80975
713.229	314.128	2.80975
713.293	308.45	2.86098
713.357	296.677	2.80975
713.429	290.859	2.80975
713.493	279.225	2.80975
713.557	267.59	2.80975
713.621	261.773	2.80975
713.685	250.139	2.80975
713.757	244.322	2.80975
713.821	232.898	2.91221
713.885	226.87	2.80975
713.949	215.333	2.86098
714.013	209.418	2.80975
714.085	197.784	2.80975
714.149	191.967	2.80975
714.221	180.414	2.86098
714.285	174.515	2.80975
714.349	162.954	2.86098
714.421	151.247	2.80975
714.485	145.495	2.86098
714.549	133.855	2.86098
714.613	128.035	2.86098
714.677	116.396	2.86098
714.749	110.577	2.86098
714.813	98.9365	2.86098
714.877	93.075	2.80975
714.941	81.4402	2.80975
715.005	75.6233	2.80975
715.077	64.018	2.86098
715.141	58.198	2.86098
715.205	46.5585	2.86098
715.269	34.9027	2.80975
715.333	29.0859	2.80975
715.405	17.4595	2.86098
715.469	11.6395	2.86098
715.533	5.81681	2.80975
717.541	5.82207	2.91221
719.589	5.81944	2.86098
721.637	5.82207	2.91221
723.686	5.82207	2.91221
725.734	5.82207	2.91221
727.782	5.8247	2.96343
729.79	5.8247	2.96343
731.853	5.8247	2.96343
733.901	5.82734	3.01466
735.949	5.8247	2.96343
737.997	5.82734	3.01466
739.997	5.82998	3.06589
741.406	11.6605	3.06589
743.462	11.6605	3.06589
745.51	11.6605	3.06589
747.565	11.6658	3.11711
749.573	11.6605	3.06589
751.573	11.6711	3.16834
753.637	11.6711	3.16834
755.685	11.6711	3.16834
757.733	11.6711	3.16834
758.437	17.507	3.16834
760.486	17.507	3.16834
762.542	17.507	3.16834
764.59	17.507	3.16834
766.597	17.5149	3.21956
768.597	17.5149	3.21956
770.597	17.5228	3.27079
772.597	17.5228	3.27079
774.653	17.5228	3.27079
776.654	17.5308	3.32202
777.486	23.374	3.32202
777.614	17.5308	3.32202
778.198	23.3634	3.27079
780.246	23.374	3.32202
782.301	23.374	3.32202
784.309	23.374	3.32202
786.309	23.374	3.32202
788.309	23.374	3.32202
790.309	23.3846	3.37324
792.309	23.3846	3.37324
794.358	23.3846	3.37324
796.358	23.3952	3.42447
797.582	29.2443	3.42447
797.646	23.3952	3.42447
799.078	29.2443	3.42447
799.205	23.3952	3.42447
799.27	29.2576	3.4757
801.317	29.2443	3.42447
803.373	29.2576	3.4757
805.421	29.2576	3.4757
807.469	29.2576	3.4757
809.517	29.2576	3.4757
811.566	29.2709	3.52692
813.566	29.2709	3.52692
815.574	29.2709	3.52692
817.637	29.2709	3.52692
819.685	29.2842	3.57815
821.733	29.2709	3.52692
823.781	29.2842	3.57815
825.837	29.2842	3.57815
827.885	29.2842	3.57815
828.205	35.1407	3.57815
830.254	35.1566	3.62937
832.302	35.1566	3.62937
834.35	35.1566	3.62937
836.413	35.1566	3.62937
837.437	41.035	3.6806
839.437	41.035	3.6806
841.485	41.035	3.6806
841.549	46.8974	3.6806
843.549	46.9188	3.73182
845.085	52.7833	3.73182
847.134	52.7593	3.6806
849.182	52.7833	3.73182
851.238	58.6483	3.73182
853.285	58.6483	3.73182
855.333	58.675	3.78305
857.381	58.6483	3.73182
858.213	64.5428	3.78305
860.269	64.5722	3.83428
862.293	64.5428	3.78305
862.613	70.4099	3.78305
864.662	70.4099	3.78305
866.71	70.442	3.83428
867.606	76.3124	3.83428
869.654	76.3472	3.8855
870.109	70.4741	3.8855
872.157	70.4741	3.8855
874.013	64.6016	3.8855
876.061	64.6606	3.98796
878.109	64.6016	3.8855
880.109	64.6311	3.93673
882.158	64.6606	3.98796
884.158	64.6311	3.93673
886.214	64.6606	3.98796
888.237	64.6311	3.93673
890.285	64.6901	4.03918
892.333	64.6606	3.98796
892.909	70.5384	3.98796
894.957	70.5384	3.98796
897.005	70.5706	4.03918
897.325	76.4518	4.03918
899.382	76.4518	4.03918
900.542	82.3699	4.09041
902.542	82.2947	3.98796
904.022	88.2134	4.03918
906.069	88.2537	4.09041
907.093	94.1375	4.09041
909.093	94.1375	4.09041
909.797	100.021	4.09041
911.797	100.021	4.09041
913.525	105.953	4.14164
915.573	105.953	4.14164
917.63	106.001	4.19286
917.758	111.839	4.14164
919.806	111.891	4.19286
921.214	117.779	4.19286
923.261	117.725	4.14164
925.245	123.668	4.19286
927.301	123.668	4.19286
929.349	123.668	4.19286
931.397	123.668	4.19286
932.421	129.616	4.24408
934.47	129.675	4.29531
935.814	135.508	4.24408
937.486	141.529	4.34654
938.926	147.359	4.29531
940.221	153.323	4.34654
941.509	159.294	4.39776
942.805	165.193	4.39776
944.021	171.25	4.50022
945.061	177.073	4.44899
946.173	182.976	4.44899
947.341	188.965	4.50022
948.637	194.959	4.55144
949.861	200.867	4.55144
951.214	206.776	4.55144
952.622	212.878	4.6539
954.222	218.792	4.6539
956.238	218.792	4.6539
958.293	218.993	4.75635
958.613	213.074	4.75635
959.957	207.155	4.75635
960.917	201.329	4.80758
961.821	195.318	4.75635
962.597	189.486	4.80758
963.621	183.565	4.80758
965.029	177.725	4.8588
967.077	177.725	4.8588
967.269	171.801	4.8588
969.326	171.801	4.8588
971.374	171.801	4.8588
973.422	171.959	4.96125
975.477	171.959	4.96125
977.525	171.959	4.96125
979.573	172.117	5.0637
981.629	172.038	5.01248
983.677	172.117	5.0637
985.725	172.196	5.11493
987.774	172.276	5.16616
989.822	172.435	5.26861
991.869	172.276	5.16616
993.917	172.355	5.21738
995.965	172.435	5.26861
998.013	172.435	5.26861
1000.06	172.435	5.26861
1001.28	166.565	5.31984
1003.28	166.565	5.31984
1005.33	166.642	5.37106
1007.38	166.642	5.37106
1009.43	166.719	5.42229
1011.48	166.796	5.47352
1013.53	166.796	5.47352
1015.58	166.796	5.47352
1017.59	166.873	5.52474
1019.6	166.873	5.52474
1021.65	166.951	5.57597
1023.7	167.028	5.62719
1025.75	167.028	5.62719
1027.76	167.105	5.67842
1029.81	167.105	5.67842
1031.86	167.183	5.72965
1033.91	167.183	5.72965
1035.96	167.26	5.78087
1036.47	161.212	5.72965
1038.52	161.212	5.72965
1040.57	161.362	5.8321
1042.61	161.437	5.88332
1044.66	161.362	5.8321
1046.71	161.362	5.8321
1048.76	161.437	5.88332
1050.81	161.586	5.98578
1052.85	161.437	5.88332
1054.9	161.511	5.93455
1056.96	161.661	6.037
1059.01	161.586	5.98578
1061.05	161.661	6.037
1063.1	161.661	6.037
1065.15	167.649	6.037
1067.2	167.726	6.08823
1069.24	167.726	6.08823
1069.69	161.737	6.08823
1070.01	167.726	6.08823
1071.81	161.812	6.13945
1073.02	167.804	6.13945
1075.07	167.804	6.13945
1076.54	161.887	6.19068
1078.21	167.882	6.19068
1079.43	161.962	6.24191
1081.48	161.962	6.24191
1083.53	161.962	6.24191
1083.66	167.882	6.19068
1083.79	162.038	6.29313
1085.84	162.038	6.29313
1087.89	162.038	6.29313
1088.14	168.117	6.34436
1088.33	162.113	6.34436
1088.65	168.117	6.34436
1090.06	162.189	6.39559
1090.19	168.117	6.34436
1092.24	168.195	6.39559
1094.29	168.195	6.39559
1096.34	168.195	6.39559
1098.13	162.34	6.49804
1100.18	162.34	6.49804
1102.24	162.34	6.49804
1104.29	162.34	6.49804
1106.34	162.416	6.54926
1108.39	162.34	6.49804
1110.44	162.416	6.54926
1112.49	162.492	6.60049
1114.53	162.567	6.65172
1116.58	162.567	6.65172
1117.18	168.667	6.70294
1119.23	168.667	6.70294
1119.29	162.567	6.65172
1121.34	162.643	6.70294
1123.34	162.719	6.75417
1125.4	162.719	6.75417
1127.45	162.719	6.75417
1129.49	162.795	6.80539
1131.5	162.872	6.85662
1132.46	168.904	6.85662
1134.52	168.904	6.85662
1136.56	168.983	6.90785
1138.61	169.062	6.95907
1140.66	168.983	6.90785
1142.71	168.983	6.90785
1144.77	169.062	6.95907
1146.82	169.141	7.0103
1148.87	169.141	7.0103
1150.93	169.141	7.0103
1152.97	169.22	7.06153
1155.02	169.22	7.06153
1157.07	169.3	7.11275
1159.12	169.3	7.11275
1161.17	169.3	7.11275
1163.22	169.458	7.21521
1165.22	169.3	7.11275
1167.27	169.3	7.11275
1169.32	169.458	7.21521
1171.36	169.538	7.26643
1172.65	163.483	7.26643
1174.69	163.483	7.26643
1175.14	169.538	7.26643
1177.19	169.618	7.31766
1179.24	169.618	7.31766
1181.29	169.618	7.31766
1183.33	169.618	7.31766
1185.38	169.777	7.42011
1185.77	163.56	7.31766
1187.3	169.697	7.36888
1187.49	163.637	7.36888
1187.75	169.777	7.42011
1187.81	163.637	7.36888
1188.14	169.777	7.42011
1188.2	163.714	7.42011
1188.4	169.857	7.47133
1188.53	163.714	7.42011
1190.57	163.714	7.42011
1192.05	169.857	7.47133
1194.09	169.857	7.47133
1196.14	169.857	7.47133
1198.19	169.857	7.47133
1200.24	170.017	7.57379
1202.29	170.017	7.57379
1204.33	169.937	7.52256
1206.38	170.097	7.62501
1208.43	170.097	7.62501
1208.81	164.022	7.62501
1210.86	164.022	7.62501
1212.91	164.1	7.67624
1214.92	164.1	7.67624
1216.71	170.177	7.67624
1218.77	170.257	7.72747
1220.81	170.257	7.72747
1222.42	164.255	7.77869
1224.47	164.255	7.77869
1226.52	164.332	7.82992
1228.56	164.332	7.82992
1230.61	164.332	7.82992
1232.66	164.332	7.82992
1234.69	164.41	7.88115
1236.74	164.487	7.93237
1238.8	164.41	7.88115
1240.84	164.487	7.93237
1242.89	164.487	7.93237
1244.94	164.487	7.93237
1246.99	164.565	7.98359
1249.04	164.565	7.98359
1251.09	164.565	7.98359
1253.13	164.565	7.98359
1255.18	164.565	7.98359
1257.23	164.799	8.13727
1259.28	164.721	8.08605
1261.32	164.643	8.03482
1263.37	164.643	8.03482
1265.42	164.799	8.13727
1267.47	164.799	8.13727
1269.52	164.799	8.13727
1271.57	164.799	8.13727
1273.61	164.799	8.13727
1273.87	158.77	8.1885
1275.92	158.695	8.13727
1277.96	158.695	8.13727
1280.01	158.695	8.13727
1282.06	158.77	8.1885
1284.11	158.77	8.1885
1284.88	152.591	8.13727
1286.93	152.735	8.23973
1288.98	152.663	8.1885
1291.03	152.735	8.23973
1293.08	152.735	8.23973
1295.13	152.808	8.29095
1297.17	152.808	8.29095
1299.22	152.808	8.29095
1301.27	152.735	8.23973
1303.32	152.88	8.34218
1305.37	152.808	8.29095
1307.37	152.88	8.34218
1308.71	158.996	8.34218
1310.76	158.996	8.34218
1312.81	158.996	8.34218
1314.85	158.996	8.34218
1316.9	159.071	8.39341
1318.95	158.92	8.29095
1321.01	158.996	8.34218
1323.06	158.996	8.34218
1325.12	158.996	8.34218
1327.12	158.92	8.29095
1329.17	158.996	8.34218
1331.22	158.996	8.34218
1333.28	158.996	8.34218
1335.33	158.996	8.34218
1337.35	159.071	8.39341
1337.48	153.025	8.44463
1339.53	152.88	8.34218
1341.53	152.88	8.34218
1343.58	152.953	8.39341
1345.63	152.953	8.39341
1347.68	152.953	8.39341
1349.72	152.953	8.39341
1351.77	153.025	8.44463
1353.82	153.025	8.44463
1355.87	153.025	8.44463
1357.92	152.953	8.39341
1359.96	153.025	8.44463
1362.01	152.953	8.39341
1364.06	159.146	8.44463
1366.11	159.222	8.49586
1368.16	159.071	8.39341
1370.2	159.222	8.49586
1372.25	159.222	8.49586
1372.64	165.346	8.49586
1374.69	165.268	8.44463
1376.73	165.346	8.49586
1378.78	165.425	8.54709
1380.83	165.425	8.54709
1382.88	165.425	8.54709
1383.2	171.551	8.54709
1385.24	171.551	8.54709
1385.5	177.763	8.59831
1386.72	183.892	8.59831
1387.77	190.112	8.64954
1388.86	196.245	8.64954
1390.11	202.474	8.70076
1392.16	202.57	8.75199
1392.29	208.709	8.75199
1394.29	202.763	8.85444
1396.34	202.763	8.85444
1397.17	196.619	8.85444
1398.93	190.474	8.85444
1400.53	184.506	8.95689
1402.57	184.506	8.95689
1402.96	178.356	8.95689
1405.01	178.441	9.00812
1407.06	178.526	9.05935
1407.25	172.37	9.05935
1409.3	172.452	9.11057
1411.35	172.534	9.1618
1413.4	172.534	9.1618
1415.44	172.617	9.21303
1415.89	166.532	9.26425
1417.95	166.532	9.26425
1420	166.611	9.31548
1422.05	166.691	9.3667
1424.09	166.691	9.3667
1425.76	172.947	9.41793
1427.81	172.947	9.41793
1429.86	173.113	9.52038
1431.92	173.113	9.52038
1433.96	173.196	9.57161
1436.01	173.196	9.57161
1438.06	173.362	9.67406
1440.08	173.362	9.67406
1442.06	167.251	9.72529
1444.11	167.331	9.77651
1446.16	167.492	9.87896
1447.76	173.445	9.72529
1448.72	167.331	9.77651
1450.77	167.492	9.87896
1452.81	167.573	9.93019
1454.86	167.573	9.93019
1455.12	173.695	9.87896
1457.17	173.779	9.93019
1459.21	173.779	9.93019
1461.27	173.946	10.0326
1462.04	167.734	10.0326
1464.09	167.734	10.0326
1466.13	167.815	10.0839
1468.18	167.895	10.1351
1470.23	167.976	10.1863
1472.28	167.976	10.1863
1474.32	167.976	10.1863
1476.37	168.138	10.2888
1478.42	168.057	10.2375
1480.47	168.219	10.34
1482.53	168.219	10.34
1484.57	168.301	10.3912
1486.62	168.301	10.3912
1488.67	168.382	10.4425
1490.72	168.382	10.4425
1492.77	168.545	10.5449
1494.82	168.545	10.5449
1496.87	168.626	10.5961
1498.93	168.545	10.5449
1500.97	168.626	10.5961
1503.02	168.626	10.5961
1505.07	168.708	10.6474
1507.08	168.708	10.6474
1509.13	168.789	10.6986
1511.19	168.953	10.801
1513.25	168.871	10.7498
1515.29	168.953	10.801
1517.34	168.789	10.6986
1519.39	168.871	10.7498
1521.44	168.953	10.801
1522.53	162.695	10.801
1524.55	162.774	10.8523
1526.6	162.774	10.8523
1528.65	162.695	10.801
1530.7	162.853	10.9035
1532.75	162.853	10.9035
1534.8	162.853	10.9035
1536.85	163.011	11.0059
1538.9	162.853	10.9035
1540.95	162.932	10.9547
1543	162.932	10.9547
1544.34	169.281	11.0059
1546.39	169.281	11.0059
1548.44	169.281	11.0059
1550.49	169.281	11.0059
1552.54	169.363	11.0572
1554.59	169.363	11.0572
1556.64	169.446	11.1084
1558.69	169.446	11.1084
1560.73	169.446	11.1084
1562.78	169.528	11.1596
1564.83	169.528	11.1596
1566.88	169.61	11.2108
1568.93	169.528	11.1596
1570.98	169.61	11.2108
1573.03	169.61	11.2108
1575.08	169.693	11.2621
1577.13	169.776	11.3133
1579.17	169.776	11.3133
1581.22	169.693	11.2621
1583.27	169.776	11.3133
1585.32	169.858	11.3645
1587.36	169.858	11.3645
1589.41	169.941	11.4157
1591.47	169.941	11.4157
1593.52	169.941	11.4157
1595.56	169.941	11.4157
1597.61	170.024	11.467
1599.67	170.024	11.467
1601.73	170.107	11.5182
1603.77	170.107	11.5182
1605.82	170.19	11.5694
1607.87	170.19	11.5694
1609.92	170.19	11.5694
1611.96	170.19	11.5694
1614.01	170.273	11.6207
1616.03	170.273	11.6207
1618.08	170.439	11.7231
1620.13	170.356	11.6719
1622.17	170.356	11.6719
1624.22	170.439	11.7231
1626.27	170.439	11.7231
1628.32	170.439	11.7231
1630.36	170.439	11.7231
1632.41	170.439	11.7231
1634.46	170.522	11.7743
1635.68	164.207	11.7743
1635.74	170.606	11.8256
1637.79	170.606	11.8256
1639.2	164.287	11.8256
1639.52	170.606	11.8256
1639.65	164.207	11.7743
1641.71	164.367	11.8768
1643.76	164.367	11.8768
1645.81	164.367	11.8768
1647.85	164.448	11.928
1649.77	170.773	11.928
1651.82	170.856	11.9792
1653.87	170.856	11.9792
1655.92	170.856	11.9792
1657.97	170.856	11.9792
1660.03	170.94	12.0305
1662.05	170.94	12.0305
1662.17	164.609	12.0305
1662.24	170.94	12.0305
1663.46	164.609	12.0305
1663.72	170.94	12.0305
1663.78	164.609	12.0305
1663.91	170.94	12.0305
1665.93	170.94	12.0305
1667.93	170.94	12.0305
1669.94	171.108	12.1329
1671.94	171.024	12.0817
1674.01	171.108	12.1329
1674.53	164.77	12.1329
1674.59	171.108	12.1329
1675.18	164.77	12.1329
1676.29	171.108	12.1329
1676.62	164.851	12.1841
1676.69	171.108	12.1329
1677.39	164.932	12.2354
1679.44	164.851	12.1841
1681.48	164.851	12.1841
1683.53	164.932	12.2354
1685.45	171.276	12.2354
1687.5	171.276	12.2354
1689.55	171.36	12.2866
1691.6	171.528	12.389
1693.65	171.444	12.3378
1694.48	165.013	12.2866
1696.48	165.175	12.389
1698.53	165.094	12.3378
1700.57	165.175	12.389
1702.62	165.175	12.389
1704.67	165.256	12.4403
1706.72	165.175	12.389
1708.77	165.256	12.4403
1710.82	165.256	12.4403
1712.87	165.338	12.4915
1714.92	165.338	12.4915
1716.96	165.419	12.5427
1719.01	165.419	12.5427
1721.06	165.5	12.594
1723.11	165.5	12.594
1725.16	165.5	12.594
1727.21	165.5	12.594
1729.26	165.582	12.6452
1731.28	165.582	12.6452
1732.88	159.213	12.6452
1734.93	159.213	12.6452
1736.98	159.135	12.594
1738.65	152.92	12.6964
1740.7	152.845	12.6452
1742.56	146.621	12.7476
1744.6	146.548	12.6964
1746.66	146.548	12.6964
1748.71	146.548	12.6964
1749.41	140.177	12.6964
1751.46	140.177	12.6964
1753.51	140.107	12.6452
1755.57	140.107	12.6452
1757.61	146.621	12.7476
1758.7	153.071	12.7989
1759.53	159.37	12.7476
1760.25	165.827	12.7989
1761.01	172.12	12.7476
1761.67	178.671	12.8501
1762.37	185.052	12.8501
1763.14	191.433	12.8501
1764.11	197.912	12.9013
1766.16	198.108	13.0038
1767.69	191.622	12.9525
1769.49	185.327	13.0038
1771.17	179.024	13.055
1773.22	179.113	13.1062
1773.99	172.716	13.1062
1776.04	172.802	13.1574
1778.09	172.887	13.2087
1778.41	166.484	13.2087
1780.45	166.484	13.2087
1782.5	166.566	13.2599
1784.55	166.732	13.3623
1786.6	166.649	13.3111
1788.65	166.814	13.4136
1789.03	160.319	13.3623
1791.08	160.478	13.4648
1793.13	160.478	13.4648
1795.17	160.557	13.516
1797.22	160.637	13.5672
1799.27	160.717	13.6185
