# Supplementary material for: A temperature- and stress-controlled failure criterion for ice-filledpermafrost rock joints
Source: Copernicus journal article supplement (doi:10.5194/tc-2018-57), 2018-03-28
Supplement: Supplementary file 1 [file tc-2018-57-supplement.zip › Suppl. material_Mamot et al/data_timeseries_shearmachine_exp7b_WSK_spec2_Fig. S3.xlsx]

## Sheet: Sheet1
time_sec	shear_stress_kPa	shear_deform_mm
0.075	0	0.0105704
2.076	0	0.0105704
4.108	0	0.0105704
6.139	0	0.0105704
8.155	0	0.0105704
10.195	0	0.0406556
11.755	5.63857	0.0105704
12.267	0	0.0105704
13.059	5.63857	0.0105704
13.259	0	0.0105704
14.819	5.64105	0.0617974
15.851	0	0.0406556
17.875	0	0.0105704
19.876	0	0.0105704
21.9	0	0.0105704
23.915	0	0.0105704
25.939	0	0.0105704
27.955	0	0.0105704
29.971	0	0.0105704
30.171	5.64002	0.0406556
32.195	5.64105	0.0617974
34.251	5.63857	0.0105704
36.308	5.64002	0.0406556
38.364	5.63857	0.0105704
40.419	5.63857	0.0105704
42.467	0	0.0406556
44.523	0	0.0105704
46.579	0	0.0105704
48.179	5.63857	0.0105704
50.227	5.64002	0.0406556
52.275	5.64105	0.0617974
54.332	5.64105	0.0617974
56.26	0	0.0406556
57.292	5.63857	0.0105704
59.347	5.64105	0.0617974
60.627	0	0.0105704
62.675	5.64002	0.0406556
64.723	5.63857	0.0105704
66.771	5.63857	0.0105704
68.819	5.64002	0.0406556
70.867	5.63857	0.0105704
72.916	5.64002	0.0406556
74.963	5.63857	0.0105704
77.011	5.63857	0.0105704
79.067	5.63857	0.0105704
81.115	5.63857	0.0105704
83.163	5.63857	0.0105704
85.211	5.63857	0.0105704
87.259	5.63857	0.0105704
89.316	5.64002	0.0406556
91.364	5.63857	0.0105704
93.411	5.63857	0.0105704
95.467	5.64105	0.0617974
97.515	5.63857	0.0105704
99.571	5.63857	0.0105704
101.571	5.63857	0.0105704
103.619	5.64002	0.0406556
105.667	5.63857	0.0105704
107.716	5.63857	0.0105704
109.763	5.63857	0.0105704
111.811	5.63857	0.0105704
113.859	5.64002	0.0406556
115.907	5.63857	0.0105704
117.955	5.64105	0.0617974
120.003	5.63857	0.0105704
122.051	5.63857	0.0105704
124.1	5.63857	0.0105704
126.148	5.63857	0.0105704
128.195	5.63857	0.0105704
130.243	5.63857	0.0105704
132.291	5.63857	0.0105704
134.339	5.64105	0.0617974
136.387	5.63857	0.0105704
138.435	5.64002	0.0406556
140.483	5.63857	0.0105704
142.532	5.63857	0.0105704
144.58	5.63857	0.0105704
146.627	5.63857	0.0105704
148.675	5.63857	0.0105704
150.723	5.63857	0.0105704
152.771	5.63857	0.0105704
154.771	5.64002	0.0406556
156.819	5.64002	0.0406556
158.868	5.63857	0.0105704
160.916	5.63857	0.0105704
162.643	0	0.0406556
164.699	0	0.0105704
165.787	5.63857	0.0105704
166.819	0	0.0406556
168.875	0	0.0105704
170.923	0	0.0406556
172.971	0	0.0617974
174.315	5.64002	0.0406556
176.372	5.64105	0.0617974
178.42	5.63857	0.0105704
180.467	5.63857	0.0105704
182.523	5.64105	0.0617974
184.571	5.64105	0.0617974
186.619	5.63857	0.0105704
188.675	5.63857	0.0105704
190.731	5.64002	0.0406556
192.787	5.63857	0.0105704
194.788	5.63857	0.0105704
196.844	5.63857	0.0105704
198.851	5.64105	0.0617974
200.899	5.63857	0.0105704
202.955	5.63857	0.0105704
205.003	5.63857	0.0105704
207.059	5.63857	0.0105704
209.107	5.63857	0.0105704
211.156	5.63857	0.0105704
213.204	5.64105	0.0617974
215.259	5.63857	0.0105704
217.307	5.63857	0.0105704
219.355	5.63857	0.0105704
221.403	5.63857	0.0105704
223.451	5.63857	0.0105704
225.499	5.63857	0.0105704
227.547	5.63857	0.0105704
229.596	5.64105	0.0617974
231.644	5.63857	0.0105704
233.691	5.64105	0.0617974
235.739	5.63857	0.0105704
237.787	5.63857	0.0105704
239.835	5.63857	0.0105704
241.883	5.63857	0.0105704
243.931	5.63857	0.0105704
245.98	5.63857	0.0105704
248.028	5.63857	0.0105704
250.075	5.63857	0.0105704
252.123	5.63857	0.0105704
254.171	5.64002	0.0406556
256.219	5.63857	0.0105704
258.267	5.63857	0.0105704
260.323	5.63857	0.0105704
262.331	5.63857	0.0105704
264.388	5.64002	0.0406556
266.388	5.63857	0.0105704
268.435	5.63857	0.0105704
270.491	5.63857	0.0105704
272.539	5.64105	0.0617974
274.595	5.64105	0.0617974
276.643	5.64002	0.0406556
278.691	5.63857	0.0105704
280.739	5.64105	0.0617974
282.788	5.63857	0.0105704
284.836	5.63857	0.0105704
286.883	5.63857	0.0105704
288.931	5.64105	0.0617974
290.979	5.63857	0.0105704
293.027	5.64002	0.0406556
295.075	5.63857	0.0105704
297.123	5.64002	0.0406556
299.172	5.63857	0.0105704
301.22	5.64002	0.0406556
303.267	5.64105	0.0617974
305.323	5.64002	0.0406556
307.379	5.63857	0.0105704
309.435	5.64002	0.0406556
311.491	5.63857	0.0105704
313.547	5.63857	0.0105704
315.603	5.63857	0.0105704
317.66	5.63857	0.0105704
319.708	5.6425	0.0918826
321.755	5.63857	0.0105704
323.803	5.63857	0.0105704
325.851	5.63857	0.0105704
327.899	5.63857	0.0105704
329.947	5.63857	0.0105704
331.995	5.63857	0.0105704
334.052	5.64105	0.0617974
336.052	5.64105	0.0617974
338.099	5.64002	0.0406556
340.099	5.63857	0.0105704
342.147	5.63857	0.0105704
344.195	5.63857	0.0105704
346.251	5.64002	0.0406556
347.531	0	0.0406556
348.819	5.6406	0.0406556
349.587	11.2905	0.143109
350.291	16.9287	0.0918826
350.932	22.5717	0.0918826
351.58	28.2142	0.0918826
352.156	33.8722	0.143109
352.74	39.5178	0.143109
353.188	45.1628	0.143109
353.708	50.8083	0.143109
354.228	56.4533	0.143109
354.868	62.0989	0.143109
355.523	67.7742	0.194334
356.291	73.4217	0.194334
357.067	79.0697	0.194334
357.779	84.7551	0.24556
358.419	90.405	0.24556
359.059	96.0979	0.296787
359.715	101.75	0.296787
360.355	107.403	0.296787
361.059	113.106	0.348013
361.835	118.761	0.348013
362.611	124.362	0.296787
363.451	130.015	0.296787
364.347	135.727	0.348013
365.499	141.383	0.348013
366.459	147.037	0.348013
367.555	152.693	0.348013
368.644	158.348	0.348013
370.052	164.003	0.348013
371.204	169.734	0.39924
372.691	175.469	0.450466
374.299	181.129	0.450466
375.579	186.789	0.450466
376.739	192.534	0.501691
378.083	198.197	0.501691
379.683	203.86	0.501691
381.291	209.523	0.501691
382.707	215.471	0.65537
384.451	220.946	0.552917
386.06	226.811	0.65537
387.532	232.276	0.552917
388.94	238.046	0.604144
390.155	243.822	0.65537
391.499	249.382	0.604144
393.115	255.163	0.65537
394.971	260.833	0.65537
396.899	266.621	0.706597
398.955	266.739	0.757823
399.467	272.414	0.757823
401.131	266.739	0.757823
401.323	261.064	0.757823
401.515	255.388	0.757823
401.715	249.713	0.757823
401.907	244.038	0.757823
402.099	238.362	0.757823
402.291	232.687	0.757823
402.483	227.012	0.757823
402.675	221.337	0.757823
402.867	215.661	0.757823
403.059	210.079	0.80905
403.187	204.311	0.757823
403.388	198.723	0.80905
403.588	192.96	0.757823
403.78	187.285	0.757823
403.98	181.69	0.80905
404.18	175.934	0.757823
404.38	170.184	0.706597
404.58	164.583	0.757823
404.772	158.979	0.80905
404.972	153.301	0.80905
405.164	147.557	0.757823
405.364	141.945	0.80905
405.564	136.207	0.757823
405.756	130.532	0.757823
405.948	124.967	0.860274
406.14	119.287	0.860274
406.34	113.506	0.757823
406.54	107.878	0.80905
406.796	102.2	0.80905
406.988	96.5229	0.80905
407.188	90.885	0.860274
407.38	85.1674	0.80905
409.243	90.885	0.860274
410.923	96.5656	0.860274
412.715	102.246	0.860274
414.763	102.291	0.911501
415.211	107.974	0.911501
417.259	108.022	0.962727
419.307	107.974	0.911501
421.356	108.022	0.962727
423.404	108.022	0.962727
425.451	108.07	1.01395
426.099	102.381	1.01395
428.155	102.427	1.06518
430.203	102.427	1.06518
432.251	102.427	1.06518
434.299	102.472	1.11641
436.347	102.518	1.16763
438.396	102.518	1.16763
440.444	102.518	1.16763
442.491	102.563	1.21886
444.539	102.563	1.21886
446.587	102.563	1.21886
448.635	102.563	1.21886
450.683	102.609	1.27008
452.739	102.609	1.27008
454.787	102.654	1.32131
456.844	102.746	1.42376
458.892	102.7	1.37254
460.939	102.7	1.37254
462.987	102.746	1.42376
465.035	102.746	1.42376
465.675	97.0379	1.42376
467.731	97.081	1.47499
469.715	102.791	1.47499
469.907	97.081	1.47499
471.955	97.081	1.47499
474.004	97.1242	1.52621
476.052	97.1242	1.52621
478.107	97.1675	1.57744
480.155	97.1675	1.57744
482.203	97.1675	1.57744
484.251	97.2108	1.62867
486.299	97.1675	1.57744
488.347	97.2108	1.62867
490.395	97.2108	1.62867
492.444	97.2541	1.67989
494.492	97.2541	1.67989
496.547	97.2541	1.67989
498.595	97.2974	1.73112
500.643	97.2974	1.73112
502.691	97.2974	1.73112
504.747	97.2974	1.73112
506.411	103.066	1.78234
508.468	103.066	1.78234
510.516	103.112	1.83357
512.563	103.112	1.83357
514.619	103.112	1.83357
516.667	103.158	1.8848
516.987	97.4277	1.8848
519.035	97.3843	1.83357
521.035	97.4277	1.8848
521.099	103.204	1.93602
523.099	103.204	1.93602
525.147	103.204	1.93602
527.204	103.251	1.98725
529.268	103.251	1.98725
531.315	103.251	1.98725
532.979	97.5148	1.98725
535.027	97.5584	2.03848
537.075	97.602	2.0897
539.123	97.5584	2.03848
541.171	97.5584	2.03848
543.22	97.5584	2.03848
545.268	97.602	2.0897
547.316	97.602	2.0897
549.363	97.6457	2.14093
551.411	97.6457	2.14093
553.459	97.602	2.0897
555.507	97.6457	2.14093
557.555	97.6457	2.14093
559.611	97.6894	2.19215
560.908	103.435	2.19215
562.916	103.435	2.19215
563.492	97.6894	2.19215
565.547	97.7331	2.24338
565.803	103.482	2.24338
567.339	97.7769	2.29461
569.387	97.7769	2.29461
569.899	103.528	2.29461
571.947	103.482	2.24338
572.203	97.7769	2.29461
572.395	103.528	2.29461
574.395	103.575	2.34583
576.443	103.528	2.29461
578.492	103.575	2.34583
580.54	103.575	2.34583
582.595	103.621	2.39706
584.643	103.575	2.34583
586.179	97.8207	2.34583
588.099	103.621	2.39706
590.147	103.667	2.44828
590.979	109.427	2.44828
593.027	109.525	2.55074
593.219	103.714	2.49951
595.267	103.761	2.55074
596.228	98.0404	2.60196
598.276	98.0404	2.60196
600.323	98.1286	2.70442
602.371	98.1286	2.70442
603.459	92.3561	2.70442
605.515	92.3976	2.75564
607.563	92.3976	2.75564
609.611	92.4392	2.80687
611.659	92.5225	2.90932
613.66	92.4808	2.85809
615.716	92.5225	2.90932
617.763	92.5642	2.96055
619.811	92.6059	3.01177
621.859	92.6059	3.01177
623.915	92.6894	3.11423
624.363	86.8967	3.11423
626.363	86.9359	3.16545
628.411	86.9359	3.16545
630.459	86.9752	3.21668
632.516	87.0538	3.31913
634.572	87.0538	3.31913
636.619	87.0538	3.31913
638.667	87.1326	3.42158
640.715	87.1326	3.42158
642.763	87.1326	3.42158
644.811	87.172	3.47281
646.859	87.2115	3.52403
648.908	87.2115	3.52403
650.956	87.2905	3.62649
653.003	87.3301	3.67771
655.003	87.2905	3.62649
657.059	87.3697	3.72894
659.107	87.3697	3.72894
661.155	87.4888	3.88262
663.203	87.4888	3.88262
665.203	87.4888	3.88262
667.252	87.5683	3.98507
669.299	87.5683	3.98507
671.347	87.6081	4.0363
673.395	87.648	4.08752
675.443	87.648	4.08752
677.443	87.648	4.08752
679.491	87.6879	4.13875
680.003	93.5333	4.13875
682.059	93.5333	4.13875
684.108	93.6186	4.2412
686.156	93.6186	4.2412
688.211	93.6186	4.2412
690.267	93.704	4.34365
691.035	87.8478	4.34365
693.083	87.8478	4.34365
695.131	87.8879	4.39488
697.179	87.928	4.44611
699.227	87.8879	4.39488
701.276	87.9682	4.49733
703.324	87.9682	4.49733
704.476	82.1785	4.59979
706.531	82.1785	4.59979
708.579	82.1785	4.59979
710.627	82.2161	4.65101
712.675	82.2537	4.70224
714.723	82.2537	4.70224
716.771	82.2537	4.70224
718.82	82.329	4.80469
720.868	82.329	4.80469
722.915	82.4044	4.90714
724.971	82.4044	4.90714
726.971	82.3667	4.85591
729.027	82.4044	4.90714
731.075	82.4422	4.95837
733.123	82.4422	4.95837
735.171	82.4422	4.95837
737.22	82.48	5.00959
739.268	82.5179	5.06082
741.315	82.5179	5.06082
743.363	82.5558	5.11205
745.411	82.5558	5.11205
747.459	82.5558	5.11205
749.507	82.6316	5.2145
751.555	82.5937	5.16327
753.612	82.6316	5.2145
755.66	82.6316	5.2145
757.707	82.6696	5.26573
759.755	82.7076	5.31695
761.811	82.7076	5.31695
763.859	82.7457	5.36817
765.907	82.7457	5.36817
767.955	82.7838	5.4194
770.003	82.7838	5.4194
772.052	82.8219	5.47063
774.1	82.8219	5.47063
776.147	82.86	5.52185
778.195	82.86	5.52185
780.243	82.8982	5.57308
782.291	82.8982	5.57308
784.291	82.9365	5.62431
786.339	82.9365	5.62431
788.388	82.9747	5.67553
790.436	82.9747	5.67553
792.483	83.013	5.72676
794.531	83.013	5.72676
796.555	83.013	5.72676
798.603	83.013	5.72676
800.651	83.0514	5.77799
802.699	83.0514	5.77799
804.747	83.0897	5.82921
806.796	83.0897	5.82921
808.844	83.1281	5.88044
810.907	83.1666	5.93167
812.955	83.1666	5.93167
815.003	83.205	5.98289
817.051	83.1666	5.93167
819.099	83.205	5.98289
821.147	83.2435	6.03412
823.196	83.2435	6.03412
825.244	83.2435	6.03412
827.292	83.2821	6.08534
829.339	83.3207	6.13657
831.387	83.2821	6.08534
833.435	83.3593	6.18779
835.483	83.3207	6.13657
837.531	83.3979	6.23902
839.587	83.3979	6.23902
841.636	83.3979	6.23902
842.924	77.4766	6.29025
844.987	77.5126	6.34147
847.035	77.5126	6.34147
849.091	77.5846	6.44393
851.139	77.5846	6.44393
853.187	77.6206	6.49515
855.235	77.6567	6.54638
857.291	77.6567	6.54638
859.3	77.6567	6.54638
861.348	77.6928	6.5976
863.395	77.729	6.64883
865.443	77.7652	6.70006
867.491	77.7652	6.70006
867.619	83.7473	6.70006
869.667	83.7473	6.70006
871.715	83.7863	6.75128
873.763	83.8254	6.80251
875.812	83.8645	6.85374
876.836	77.9102	6.90496
878.844	77.9102	6.90496
880.891	77.9466	6.95619
882.939	77.9102	6.90496
884.987	77.9466	6.95619
887.035	78.0194	7.05864
889.083	77.983	7.00741
891.139	78.0194	7.05864
893.188	78.0194	7.05864
894.02	84.0996	7.16109
896.076	84.0996	7.16109
898.123	84.0996	7.16109
900.171	84.139	7.21232
902.219	84.0996	7.16109
902.667	78.0923	7.16109
904.667	78.1288	7.21232
906.715	78.2386	7.366
908.763	78.202	7.31477
910.812	78.2386	7.366
912.028	84.2177	7.31477
914.076	84.2572	7.366
916.123	84.2966	7.41722
918.179	84.2572	7.366
920.227	78.2752	7.41722
922.275	78.3486	7.51968
924.331	78.3119	7.46845
926.379	78.3486	7.51968
928.428	78.3486	7.51968
930.484	78.3486	7.51968
932.531	78.3854	7.5709
934.195	84.4153	7.5709
936.195	84.4945	7.67335
938.243	84.4945	7.67335
940.291	84.5342	7.72458
942.347	84.5739	7.77581
943.691	78.5327	7.77581
945.748	78.5696	7.82703
947.796	78.5696	7.82703
949.803	78.6436	7.92948
951.851	78.6436	7.92948
953.899	78.6806	7.98071
955.947	78.6806	7.98071
957.995	78.7548	8.08316
960.043	78.7177	8.03194
962.091	78.7548	8.08316
964.14	78.8291	8.18562
966.188	78.8291	8.18562
968.235	78.8291	8.18562
970.283	78.9035	8.28807
972.339	78.9035	8.28807
974.387	78.9407	8.33929
976.435	78.9407	8.33929
978.491	78.978	8.39052
980.54	78.978	8.39052
982.588	79.0901	8.5442
984.643	79.0527	8.49297
986.651	79.0527	8.49297
988.699	79.0527	8.49297
990.747	79.1276	8.59542
992.795	79.1276	8.59542
994.843	79.0901	8.5442
996.843	79.1276	8.59542
998.892	79.1276	8.59542
1000.94	79.1651	8.64665
1002.99	79.2026	8.69788
1005.03	79.2026	8.69788
1007.08	79.2401	8.7491
1009.13	79.2401	8.7491
1011.18	79.2777	8.80033
1013.23	79.3529	8.90278
1015.28	79.3153	8.85156
1017.28	79.3529	8.90278
1019.33	79.4283	9.00524
1021.38	79.3906	8.95401
1023.43	79.4283	9.00524
1025.47	79.4283	9.00524
1027.52	79.4283	9.00524
1029.57	79.4283	9.00524
1031.62	79.5039	9.10768
1033.68	79.4661	9.05646
1035.72	79.5417	9.15891
1037.77	79.6174	9.26136
1039.82	79.5417	9.15891
1041.87	79.6174	9.26136
1043.92	79.5795	9.21014
1045.97	79.6174	9.26136
1048.02	79.6554	9.31259
1050.07	79.6554	9.31259
1052.12	79.7313	9.41504
1054.17	79.6933	9.36382
1056.22	79.7313	9.41504
1058.27	79.7694	9.46627
1060.31	79.7694	9.46627
1062.36	79.8074	9.5175
1063.13	79.8837	9.61995
1065.18	79.8455	9.56872
1067.23	79.8455	9.56872
1069.28	79.8455	9.56872
1071.32	79.8837	9.61995
1073.37	79.8837	9.61995
1075.42	79.8837	9.61995
1077.47	79.9601	9.7224
1079.52	79.9218	9.67118
1081.56	79.9601	9.7224
1083.61	79.9983	9.77362
1085.66	79.9983	9.77362
1087.72	79.9983	9.77362
1089.76	80.0366	9.82485
1091.81	80.0749	9.87608
1093.83	80.1516	9.97853
1095.88	80.0749	9.87608
1097.92	80.1516	9.97853
1099.97	80.1516	9.97853
1102.02	80.1516	9.97853
1104.07	80.2285	10.081
1106.07	80.2285	10.081
1108.11	80.267	10.1322
1110.16	80.3056	10.1834
1112.21	80.3441	10.2347
1114.26	80.3441	10.2347
1116.31	80.3441	10.2347
1118.35	80.3827	10.2859
1120.4	80.3827	10.2859
1122.45	80.4214	10.3371
1124.51	80.4601	10.3883
1126.56	80.4988	10.4396
1128.61	80.4988	10.4396
1130.66	80.4988	10.4396
1132.71	80.5375	10.4908
1134.76	80.5763	10.542
1136.8	80.6151	10.5932
1138.85	80.5763	10.542
1140.9	80.6151	10.5932
1142.95	80.654	10.6445
1144.99	80.654	10.6445
1147.04	80.654	10.6445
1149.09	80.654	10.6445
1151.14	80.6929	10.6957
1152.99	86.9422	10.7469
1155.04	86.9842	10.7982
1155.17	80.7318	10.7469
1157.22	80.7708	10.7982
1159.26	80.8098	10.8494
1161.27	80.7708	10.7982
1163.31	80.8488	10.9006
1165.36	80.8879	10.9518
1167.41	80.8879	10.9518
1169.42	80.927	11.0031
1171.47	81.0054	11.1055
1173.52	81.0054	11.1055
1175.57	81.0054	11.1055
1177.63	81.0054	11.1055
1179.68	81.0839	11.208
1181.72	81.1232	11.2592
1183.77	81.2019	11.3616
1185.82	81.1625	11.3104
1187.87	81.2019	11.3616
1189.92	81.2413	11.4129
1191.96	81.2808	11.4641
1194.01	81.2808	11.4641
1196.06	81.3598	11.5665
1198.11	81.3202	11.5153
1200.16	81.3598	11.5665
1202.2	81.3993	11.6178
1204.25	81.3993	11.6178
1206.3	81.4389	11.669
1208.35	81.4389	11.669
1210.4	81.4786	11.7202
1212.45	81.4389	11.669
1214.51	81.5182	11.7714
1216.56	81.5182	11.7714
1218.6	81.558	11.8227
1220.65	81.5977	11.8739
1222.66	81.6375	11.9251
1224.71	81.5977	11.8739
1226.76	81.5977	11.8739
1228.76	81.5977	11.8739
1230.8	81.6375	11.9251
1232.85	81.6375	11.9251
1234.9	81.6773	11.9764
1236.95	81.6773	11.9764
1238.99	81.6773	11.9764
1241.04	81.7172	12.0276
1242.39	88.0034	12.0276
1244.44	88.0463	12.0788
1245.08	81.7172	12.0276
1247.12	81.797	12.13
1249.18	81.837	12.1813
1250.4	75.5792	12.2325
1251.36	81.837	12.1813
1253.42	81.9171	12.2837
1255.47	81.9171	12.2837
1257.52	81.9572	12.3349
1259.56	81.9572	12.3349
1261.61	81.9973	12.3862
1263.66	82.0374	12.4374
1265.67	82.0777	12.4886
1267.72	82.1582	12.5911
1269.77	82.1582	12.5911
1271.83	82.1985	12.6423
1273.88	82.1985	12.6423
1275.92	82.2389	12.6935
1277.97	82.2389	12.6935
1280.02	82.2793	12.7447
1282.07	82.3602	12.8472
1284.11	82.3602	12.8472
1286.16	82.3602	12.8472
1288.17	82.4007	12.8984
1290.23	82.4007	12.8984
1292.28	82.4412	12.9496
1294.32	82.4412	12.9496
1296.37	82.4818	13.0009
1298.42	82.5224	13.0521
1300.47	82.5631	13.1033
1302.52	82.5631	13.1033
1304.56	82.6038	13.1546
1306.61	82.6038	13.1546
1308.66	82.6038	13.1546
1310.71	82.6853	13.257
1312.76	82.6853	13.257
1314.8	82.6853	13.257
1316.85	82.7262	13.3082
1318.91	82.767	13.3595
1320.96	82.7262	13.3082
1323.01	82.767	13.3595
1325.06	82.767	13.3595
1327.11	82.8489	13.4619
1329.16	82.8079	13.4107
1331.16	82.8898	13.5131
1333.21	82.8898	13.5131
1335.26	82.9309	13.5644
1337.31	82.8898	13.5131
1339.35	82.9719	13.6156
1341.4	82.9719	13.6156
1343.45	83.0542	13.718
1345.5	83.0542	13.718
1346.07	76.6658	13.718
1348.13	76.7418	13.8205
1350.18	76.7799	13.8717
1352.19	76.818	13.9229
1354.23	76.818	13.9229
1356.28	76.8562	13.9742
1358.3	76.8944	14.0254
1360.35	76.9326	14.0766
1362.4	76.9326	14.0766
1364.44	77.0092	14.1791
1366.49	77.0092	14.1791
1368.55	77.0475	14.2303
1370.59	77.0859	14.2815
1372.64	77.1243	14.3328
1374.7	77.1628	14.384
1376.76	77.2012	14.4352
1378.8	77.2783	14.5377
1380.85	77.2398	14.4864
1382.91	77.2783	14.5377
1384.91	77.3556	14.6401
1386.96	77.4329	14.7426
1389.02	77.3942	14.6913
1391.07	77.4717	14.7938
1393.11	77.5105	14.845
1395.12	77.5105	14.845
1397.17	77.5882	14.9475
1399.22	77.6271	14.9987
1401.27	77.666	15.0499
1403.32	77.705	15.1011
1405.37	77.744	15.1524
1406.97	71.3009	15.2036
1409.02	71.3009	15.2036
1411.07	71.4085	15.3573
1413.11	71.3726	15.3061
1415.16	71.4804	15.4597
1415.23	77.9004	15.3573
1416.31	71.4444	15.4085
1418.37	71.4804	15.4597
1420.42	71.5164	15.511
1422.47	71.5524	15.5622
1424.52	71.5524	15.5622
1426.26	78.0968	15.6134
1428.31	78.1756	15.7159
1430.36	78.2151	15.7671
1432.41	78.1756	15.7159
1433.7	71.7331	15.8183
1435.71	71.7694	15.8695
1437.76	71.8057	15.9208
1439.8	71.842	15.972
1441.85	71.842	15.972
1443.71	78.4527	16.0744
1444.41	71.8783	16.0232
1446.47	71.9512	16.1257
1448.52	71.9876	16.1769
1450.56	72.0241	16.2281
1452.61	72.0241	16.2281
1454.4	78.6119	16.2793
1456.45	78.6518	16.3306
1456.84	72.0972	16.3306
1458.69	78.6917	16.3818
1460.48	72.1338	16.3818
1462.53	72.1705	16.433
1464.58	72.1705	16.433
1466.63	72.2439	16.5355
1468.68	72.2806	16.5867
1470.72	72.3174	16.6379
1472.77	72.2806	16.5867
1474.82	72.3911	16.7404
1476.83	72.428	16.7916
1478.88	72.4649	16.8428
1480.93	72.5388	16.9453
1482.95	72.5388	16.9453
1484.99	72.5759	16.9965
1487.04	72.613	17.0477
1489.1	72.6501	17.099
1491.15	72.6872	17.1502
1493.2	72.6872	17.1502
1495.25	72.7244	17.2014
1497.31	72.7989	17.3039
1499.35	72.7989	17.3039
1501.4	72.8362	17.3551
1503.45	72.8735	17.4063
1505.5	72.9483	17.5088
1507.55	72.9483	17.5088
1509.6	72.9857	17.56
1511.64	73.0232	17.6112
1513.7	73.0607	17.6625
1515.75	73.1358	17.7649
1516.52	66.4186	17.6625
1516.65	73.1735	17.8161
1516.71	66.4869	17.7649
1516.84	73.1358	17.7649
1517.04	66.4869	17.7649
1517.23	73.1358	17.7649
1517.29	66.4869	17.7649
1517.36	73.1735	17.8161
1517.56	66.4869	17.7649
1517.62	73.1735	17.8161
1517.75	66.5211	17.8161
1519.8	66.5553	17.8674
1521.85	66.5896	17.9186
1523.87	66.6239	17.9698
1525.92	66.6582	18.021
1526.24	73.3621	18.0723
1528.25	73.3621	18.0723
1530.31	73.4758	18.2259
1532.31	73.4379	18.1747
1534.35	73.5137	18.2772
1536.41	73.5517	18.3284
1538.47	73.6279	18.4308
1540.52	73.6279	18.4308
1542.56	73.666	18.4821
1544.61	73.7423	18.5845
1546.66	73.7423	18.5845
1548.71	73.7805	18.6358
1550.76	73.8571	18.7382
1552.8	73.8954	18.7894
1554.85	73.9338	18.8407
1556.9	73.9338	18.8407
1558.66	80.6972	18.8919
1560.52	74.0492	18.9943
1562.56	74.0877	19.0456
1563.4	80.8232	19.0456
1565.46	80.8653	19.0968
1565.84	74.1649	19.148
1565.91	80.8653	19.0968
1567.95	80.9495	19.1992
1570	80.9917	19.2505
1572.06	81.1186	19.4041
1574.11	81.161	19.4554
1576.16	81.161	19.4554
1578.21	81.2034	19.5066
1580.26	81.2883	19.6091
1582.31	81.3735	19.7115
1584.35	81.3735	19.7115
1586.4	81.3735	19.7115
1588.45	81.4587	19.814
1590.5	81.5015	19.8652
1592.51	81.5442	19.9164
1594.56	81.6298	20.0189
