# Supplementary material for: A temperature- and stress-controlled failure criterion for ice-filledpermafrost rock joints
Source: Copernicus journal article supplement (doi:10.5194/tc-2018-57), 2018-03-28
Supplement: Supplementary file [file tc-2018-57-RC2-supplement.pdf]

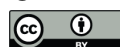

# A temperature- and stress-controlled failure criterion for ice-filled permafrost rock joints

Philipp Mamot<sup>1</sup>, Samuel Weber<sup>2</sup>, Tanja Schröder<sup>1</sup>, Michael Krautblatter<sup>1</sup>

<sup>1</sup>Chair of Landslide Research, Technical University of Munich, 80333 Munich, Germany

5 <sup>2</sup>Department of Geography, University of Zurich, 8057 Zurich, Switzerland

Correspondence to: Philipp Mamot ([philipp.mamot@tum.de](mailto:philipp.mamot@tum.de))

**Abstract.** Instability and failure of permafrost-affected rock slopes have significantly increased coincident to warming in the last decades. Most of the observed failures in permafrost-affected rock walls are likely triggered by the mechanical destabilisation of warming bedrock permafrost including effects in ice-filled joints. The failure of ice-filled rock joints has only been observed in a small number of experiments, often using concrete as a rock analogue. Here, we present a systematic study of the brittle shear failure of ice and rock-ice interfaces, simulating the accelerating phase of rock slope failure. For this, we performed 141 shear experiments with rock-ice-rock "sandwich" samples at constant strain rates provoking ice fracturing ( $10^{-3} \text{ s}^{-1}$ ), under relevant stress conditions ranging from 100 to 800 kPa, i.e. 4–30 m rock overburden, and at temperatures from -10 to -0.5 °C, typical for recent rock slope failures in alpine permafrost. To create close to natural but reproducible conditions, limestone sample surfaces were ground to international rock mechanical standard roughness. Acoustic emission (AE) was successfully applied to describe the fracturing behaviour, anticipating rock-ice failure as all failures are predated by an AE hit increase with peaks immediately prior to failure. We demonstrate that both, the warming and unloading (i.e. reduced overburden) of ice-filled rock joints lead to a significant drop in shear resistance. With a temperature increase from -10 °C to -0.5 °C, the shear stress at failure reduces by 64–78 % for normal stresses of 100–400 kPa. At a given temperature, the shear resistance of rock-ice interfaces decreases with decreasing normal stress. This can lead to a self-enforced rock slope failure propagation: as soon as a first slab has detached, further slabs become unstable through progressive thermal propagation and possibly even faster by unloading. Here, we introduce a new Mohr-Coulomb failure criterion for ice-filled rock joints that is valid for joint surfaces which we assume similar for all rock types, and which applies to temperatures from -8 to -0.5 °C and normal stresses from 100 to 400 kPa. It contains a temperature-dependent friction and cohesion which decrease by 12 %/°C and 10 %/°C respectively due to warming and it applies to temperature and stress conditions of more than 90 % of the recently documented accelerating failure phases in permafrost rock walls.

## 1 Introduction

Rock slope failures in high mountain areas potentially endanger human lives, settlements and alpine infrastructure. The impact of the climate-induced degradation of mountain permafrost on rock slope destabilisation has been inferred from numerous

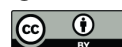

- 30 studies in the last two decades (Fischer et al., 2006; Gruber et al., 2004; Gruber and Haeberli, 2007; Raveland and Deline, 2015). Rock slope failures influenced by permafrost degradation are expected to respond to a warming climate by more frequent events (Gobiet et al., 2014; Raveland and Deline, 2011). The majority of failures in permafrost-affected rock frequently expose ice-filled joints as potential shear and detachment planes (Dramis et al., 1995; Gruber and Haeberli, 2007; Raveland et al., 2010), as e.g. the recent  $3.15 \times 10^6 \text{ m}^3$  rock slope failure at Pizzo Cengalo, Graubünden, CH, on 23 August 2017 (pers. comm.
- 35 with Phillips, 2017). Fractures and fractured zones in mountain bedrock permafrost usually contain ice to depths of several tens of metres (Deline et al., 2015; Gruber and Haeberli, 2007). Ice fillings can contribute to systematically higher shear strengths due to rock-ice-interlocking and adhesion, and thus increase rock slope stability especially when the ice is at a low temperature. This bonding of ice-filled joints is reduced or even lost as the temperature increases (Davies et al., 2001; Gruber and Haeberli, 2007).
- 40 Rock joints that are located within bedrock permafrost (ground that remains permanently frozen for at least two consecutive years; Harris et al., 1988) are referred to as “permafrost rock joints” in this paper. Permafrost conditions are fulfilled below the maximum active layer thaw which typically ranges between 2–8 m in Alpine environments (Böckli et al., 2011; Delaloye et al., 2016) and apply to ice-filled rock fractures, rock pores and microfractures (Gruber and Haeberli, 2007). In this manuscript, both, joints and fractures are used as general terms for rock discontinuities.
- 45 To anticipate failure in a warming climate, we need to improve the understanding of how rock-ice mechanical components control rock slope destabilisation and failure between -10 and 0 °C. Generally, warming of permafrost in rock slopes affects (i) the fracture toughness of rock bridges, (ii) the friction of rock-rock contacts, (iii) the ductile creep behaviour of ice and (iv) the brittle failure of ice infillings (Krautblatter et al., 2013). Whereas the mechanics of frozen rock (Dwivedi et al., 2000; Glamheden and Lindblom, 2002; Kodama et al., 2013; Krautblatter et al., 2013; Mellor, 1973) and the ductile temperature- and stress-dependent creep of ice and ice-rich soils (Arenson and Springman, 2005a; Sanderson, 1988) have been investigated in a number of studies, the brittle failure of ice infillings is still poorly understood. We hypothesise that the brittle failure of ice infillings (i.e. either along rock-ice interfaces or inside the ice) is a common final failure mechanism, which is documented by numerous exposed ice-filled joint surfaces subsequent to failure. It is mechanically dependent on fast deformations (i.e. strain rates) and, thus, is likely to control the final failure of many recent events. This study aims at developing the first
- 55 comprehensive temperature- and stress-dependent brittle failure criterion for ice-filled joints based on 141 mechanical tests on rock-ice-rock samples.
- Fracturing of ice and rock-ice-contacts mainly occurs below a rock overburden  $\leq 20 \text{ m}$  and becomes less important at greater depths, where rock mechanical components take over at greater stresses (Krautblatter et al., 2013). Here, higher confinement suppresses brittle failure and may favour creep deformation of ice (Renshaw and Schulson, 2001; Sanderson, 1988). Shear
- 60 tests on concrete-ice and concrete-ice-concrete “sandwich” samples under constant stress show that fracturing along rock-ice interfaces is the dominant failure process that occurs at a simulated rock overburden of 5–25 m, i.e. 135–630 kPa (Günzel, 2008; Krautblatter et al., 2013). Constant strain experiments show that with rising normal stress levels (from 207 to 562 kPa, i.e. approximately 8–21 m rock overburden), fracturing along rock-ice interfaces is replaced by creep deformation of the ice

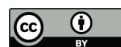

(Günzel, 2008; Krautblatter et al., 2013). In addition, higher normal stresses increasingly cause ice fillings to be squeezed away from “abutments” and preferentially lead to stress concentrations along rock-rock contacts (Krautblatter et al., 2013). Various inventories of rock slope failures in the Mont Blanc Massif show that virtually all of the failures displayed a plate-like shape with an area ranging from 25 to 33.800 m<sup>2</sup> (average of 1.570 m<sup>2</sup>) and scar depths of 1–20 m (average of 4 m) (Ravel et al., 2010; Ravel and Deline, 2008; Ravel and Deline, 2011). Most of the events have been linked to the degradation of bedrock permafrost and ice-filled joints. 97 % of them had volumes  $\leq 30.000 \text{ m}^3$  which correspond to the relevant size of dominantly ice-fracturing-controlled rock slope failures (considering the approx.  $\leq 20 \text{ m}$  rock overburden and the average area of the reported failure planes). 94 % of the failures had volumes  $\leq 23.000 \text{ m}^3$  which also refers to mainly ice-fracturing-controlled rock slope failures (considering the tested 15 m rock overburden in this study and the average area of the documented failures), as will be shown in this paper. However, even larger volumes will be partially influenced by rock-ice fracturing phenomena.

Warming of permafrost in rock slopes reduces the shear resistance along rock joints in a chronological order by (i) reducing the fracture toughness of cohesive rock bridges, (ii) by lowering friction along rock-rock contacts, (iii) by altering the creep of ice infillings and (iv) finally reducing the fracture toughness of the ice itself and of rock-ice contacts (Krautblatter et al., 2013). When ice becomes mechanically stressed, it can deform by (i) elastic or ductile creep without fracture or by (ii) brittle or ductile-brittle fracture including crack formation and propagation (Sanderson, 1988). The deformation and failure behaviour of ice changes from ductile creep to brittle fracture with strain rates  $> 10^{-4}$  and  $10^{-3} \text{ s}^{-1}$  (Arenson and Springman, 2005a; Fellin, 2013; Sanderson, 1988; Schulson and Duval, 2009). Thus, the accelerating final failure along predefined slip surfaces is increasingly likely to be governed by the brittle failure of ice (Krautblatter et al., 2013). When the ice ceases to be able to bear a certain applied load, it fails and then brittle fracture occurs. In this case, the applied load at fracture can be described as “strength” (Sanderson, 1988), an analogue to the strength at fracture in rock mechanics. In this paper, we use the term “strength” when talking about ice-mechanical behaviour as we simulate accelerating final rock slope failure conditions with strain rates that provoke ice fracturing ( $10^{-3} \text{ s}^{-1}$ ).

The temperature-dependence of mechanical properties of ice has been studied in numerous publications up to now (Arakawa and Maeno, 1997; Barnes et al., 1971; Fish and Zaretsky, 1997; Gagnon and Gammon, 1995; Jones and Glen, 1968; Sanderson, 1988; Schulson and Duval, 2009). The unconfined compressive strength of polycrystalline ice decreases by 82 % (from approx. 17 to approx. 3 MPa) with increasing temperature from -50 to 0 °C (Schulson and Duval, 2009). A warming of ice from -10 to 0 °C results in a decrease in the unconfined compressive strength by 50 % (from ca. 4 to ca. 2 MPa) and in tensile strength by 13.3 % (from 1.5 to 1.3 MPa) (Butkovich, 1954b in Hobbs, 1974). The fracture toughness of polycrystalline ice decreases by 27 % (from approx. 110 to approx. 80 kPa/m<sup>-0.5</sup>) when warming from -50 to -2 °C (Schulson and Duval, 2009). The behaviour of sediment-ice mixtures has been investigated in detail by Arenson and Springman (2005a). According to them, the strain rates of frozen soil increase with rising temperature and higher volumetric ice content. The peak shear strength of ice-rich soil (ice content  $> 60 \%$ ) decreases with increasing temperature from -5 to -1 °C.



Laboratory tests on the shear strength of ice-filled rock joints reveal a decreasing shear stress at failure with decreasing normal stress and increasing temperature towards 0 °C (Davies et al., 2000; Davies et al., 2001; Günzel, 2008; Krautblatter et al., 2013). These studies rely on approx. 40 constant stress and 50 constant strain shear experiments at temperatures from -5 to 0 °C, where the joints were composed of concrete and ice (Davies et al., 2000; Günzel, 2008). However, the applied strain rates in constant strain tests were too low to enforce fracturing of ice. Constant stress tests delivered significantly higher strain rates (Günzel, 2008; Krautblatter et al., 2013), but they are difficult to interpret in terms of fracturing initiation due to the rapidly changing strain rate conditions. In these tests, the shear strength of laboratory ice-filled rock joints consisting of concrete and ice could be approximated as

$$\tau_f = 144 \times T_c + \tau_0 \quad (1)$$

$$\tau_0 = 0.42 \times \sigma' + 41.3 \quad (2)$$

where  $\sigma'$  is the effective normal stress,  $T_c$  (°C) is the temperature of the ice at failure,  $\tau_f$  is the shear stress at failure and  $\tau_0$  is the shear strength at 0 °C (Krautblatter et al., 2013). Equation (1) exhibits a shear strength decrease of 144 kPa/°C between -0.5 and -5 °C. Experiments by Davies et al. (2000) demonstrate a reduction in shear strength by 16 or 18 %/°C (i.e. 124 or 69 kPa/°C respectively depending on the normal stress level) due to warming from -5 to -0.5 °C. A similar relation is shown for sandwich samples composed of ice and polished steel plates whose shear strength decreases by 10 %/°C (i.e. 113 kPa/°C) with increasing temperature from -10 to -2 °C (Jellinek, 1959).

We measured acoustic emission (AE) in this study to monitor the strength reduction due to creep or brittle failure of ice and rock-ice contacts and to document the progressive evolution of damage. AE refers to the generation of transient elastic waves generated by a sudden release of energy in a material (Hardy, 2003). AE events can indicate damage increase, i.e. microcrack generation and coalescence, or the shearing of existing fractures (Cox and Meredith, 1993; Scholz, 1968;). AE technology has been used extensively on the laboratory rock sample scale (Düster, 1993; Nechad et al., 2005). Scaling properties of fracturing dynamics have usually been observed during mechanical loading (Alava et al., 2006). In the time domain, the seismic events induced by damage processes display a power-law distribution

$$N(s) \sim s^{-b} \quad (3)$$

where  $N$  is the probability distribution function of the event size estimation  $s$  (e.g. the maximum amplitude of the AE signal or its energy) and  $b$  is a constant (Amitrano et al., 2012). The exponent  $b$ , originally defined in seismology, describes the slope of the magnitude distribution and provides information on the states of fractures (Scholz, 1968). Larger  $b$  exponents indicate the more predominant occurrence of microscopic fractures, while smaller  $b$  exponents indicate the occurrence of macro-fractures. An improved  $b$  exponent approach, defining the number of AE either by accumulation from the starting data or per



130 time unit, enables the application in the acoustic (Shiotani et al., 1994) with an appropriate number of AE data between 50 and 100 (Shiotani et al., 2001).

In this study, we performed 141 shear tests, using limestone-ice-limestone samples with realistic ISRM (International Society for Rock Mechanics and Rock Engineering) rock surface roughness and predefined strain rates provoking fracturing. The onset of fracturing was controlled using the AE technique. To simulate the real-world fracturing of ice and rock-ice-contacts along  
135 discontinuities in alpine permafrost rock slopes, our tests were performed in a temperature-controlled, cooled laboratory shear box with samples collected in the field. Our experiments focus on the impact of temperature and normal stress on the fracturing behaviour of ice-filled rock joints. Temperatures between -10 and -0.5 °C were tested to represent recently observed daily and annual mean temperatures of mountain bedrock permafrost (Böckli et al., 2011; Delaloye et al., 2016). Normal stresses of 100, 200 and 400 kPa (corresponding to rock overburdens of approx. 4, 8 and 15 m) were chosen to reconstruct relevant stress  
140 conditions for ice- and rock-ice-fracturing processes in permafrost rock joints mostly below the annual active layer thaw. Additional tests at 800 kPa (i.e. 30 m rock overburden) were performed to study a potential stress-dependent transition from brittle fracture to creep at stress levels above 400 kPa (Krautblatter et al., 2013; Sanderson, 1988).

So far the failure of ice-filled permafrost rock joints has been studied using concrete as a rock analogue (Davies et al., 2000; Günzel, 2008). For the first time, we use rock to closely reproduce real conditions along rock joints. Synthetic materials  
145 possibly deviate from shear strength values representative for rock joints in the field. For instance, ice sliding on granite shows a friction coefficient  $\mu$  approx. 0.5 higher than ice sliding on glass or metals, all having a similar surface asperity roughness. The higher friction of the granite-ice interfaces is due to a higher effective adhesion (Barnes et al., 1971). We assume that the shear strength of rock-ice interfaces is mostly affected by temperature, normal stress and joint surface roughness while the rock type is less important. Consequently, we use limestone as a representation for all rock types. The thermal conductivity of  
150 rocks varies in a small range of 0.5–7 W m<sup>-1</sup> K<sup>-1</sup> (Clauser and Huenges, 1993). As such, we do not expect any effect of the thermal conductivity on the shear strength which may arise due to facilitated melting along surfaces of heat-insulating solids causing a decrease in friction (Barnes et al., 1971). Further, the standardised preparation of a uniform joint surface roughness for all rock samples in this study prohibits any potential effect of differing rock types. To use rock instead of other materials probably has a greater effect on the shear strength than different rock types.

155 This paper addresses the following questions:

- 1) How does the shear strength of ice-filled rock joints respond to permafrost warming (-10° C to -0.5° C) and sudden changes in rock/ice overburden (i.e. normal stress)?
- 2) Can acoustic emission be applied to decipher precursors of breaking ice and rock-ice interfaces within fractures?
- 3) Can we derive a comprehensive stress- and temperature-dependent failure criterion for ice-filled rock joints?
- 160 4) Which real-world conditions of permafrost rock slope destabilisation can be simulated by the new failure criterion?



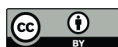

## 2 Methodology

### 2.1 Real-world setting to constrain laboratory tests

The design of the presented laboratory test setup is inspired by a benchmark example of shallow, ice-supported rock instability prior to failure exemplified by an approx.  $10^4$  m<sup>3</sup> large rockslide at the summit crestline (2885 m a.s.l.) of Germany's highest peak, the Zugspitze (2962 m a.s.l.; Fig. 1a and Fig. 1b). Since 2007, the rock mass creeps slowly at an average of 3.75 mm/year with more than five times higher deformation rates in July to October in comparison to the remaining months.

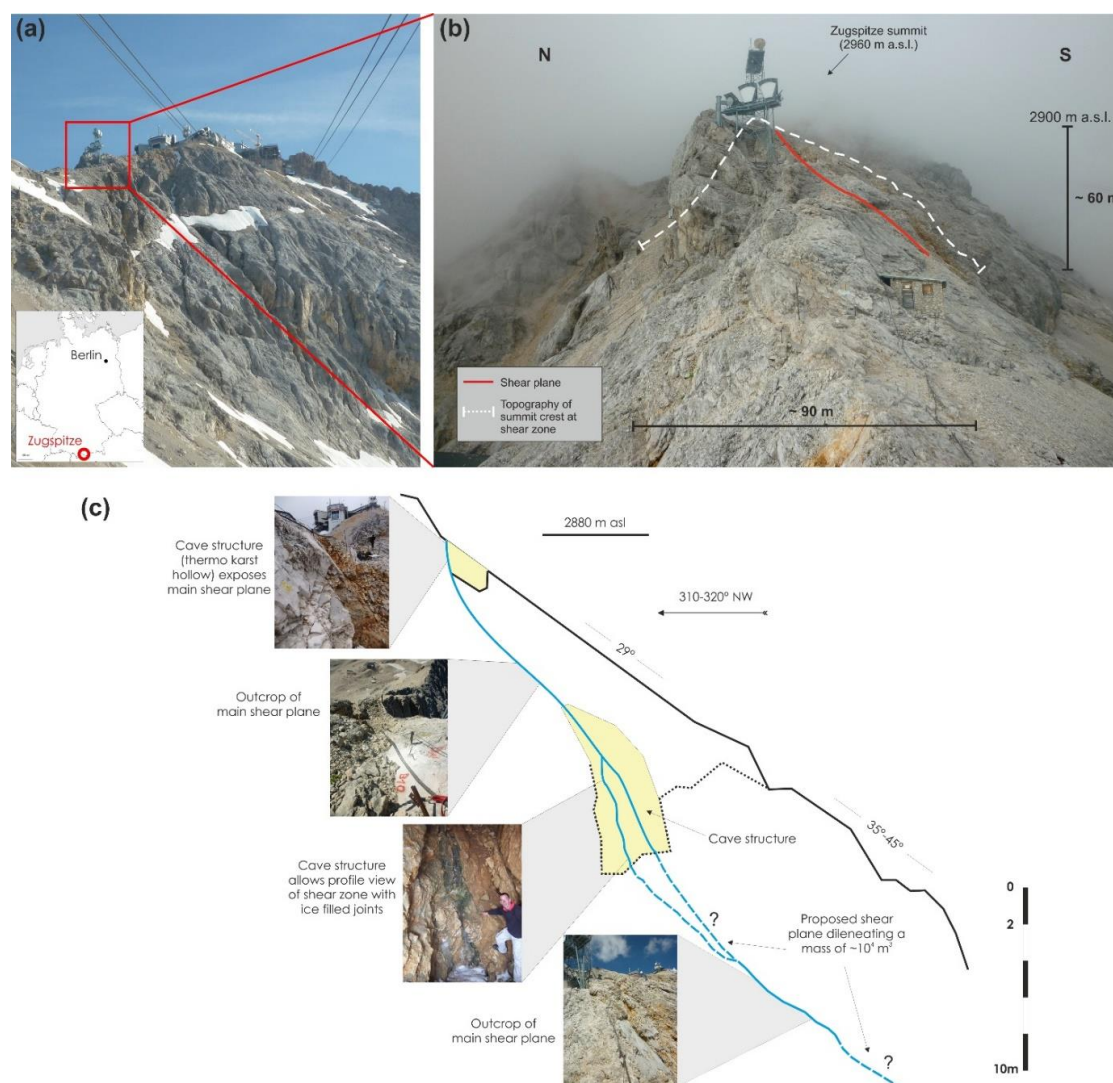

**Figure 1: (a) The Zugspitze summit area with Germany's highest peak (2962 m a.s.l.). (b) Profile view of the Zugspitze summit crest with dimensions of the rockslide. The supposed shear plane is indicated by the red line. (c) Mechanical situation and geometry of the ice-supported rockslide that is used as a real-world exemplification of the simulated temperature and stress-controlled fracturing along rock-ice interfaces in the laboratory.**



The ice-supported rockslide acts as a real-world exemplification of the simulated temperature and stress-controlled fracturing along rock-ice interfaces in our laboratory, and as such, it is a benchmark analogue to constrain temperature and stress conditions for the performed tests: (i) The depth of the main shear plane is assessed to a maximum of 10–15 m due to field mapping (Fig. 1c). The corresponding normal stresses on this shear plane (mostly  $\leq 400$  kPa) lie within the range of the tested stress levels. (ii) The occurrence of permafrost is confirmed by permanent ice-filled caves and fractures along the main shear zone (Fig. 1c). (iii) The Zugspitze summit area is located at the lower permafrost extension limit. Current borehole temperatures at the peak of the Zugspitze average  $-1.3$  °C within the permafrost core area and approach minima of  $-6$  °C at the margins (Böckli et al., 2011; Gallemann et al., 2017; Krautblatter et al., 2010; Noetzli et al., 2010). These temperatures lie well within the range of the tested temperature levels in this study. (iv) A climatic warming in the last century and an even stronger temperature increase since the 1990s can be observed at the Zugspitze, i.e. the mean annual air temperature (MAAT) in 1991–2007 was  $0.8$ – $1.1$  °C warmer than in prior 20th century reference periods (Gallemann et al., 2017; Krautblatter et al., 2010). An ongoing warming may potentially cause the degradation of permafrost in the summit crest leading to an accelerated movement in the future and thus to the fracturing of ice and rock-ice contacts, among other processes.

## 2.2 Sample preparation

The tested rock samples were collected at the Zugspitze summit crest (Fig. 1a), the same site which acts as a real-world exemplification of our laboratory tests. The rock samples consist of Triassic Wetterstein limestone, which builds up the upper part of the Zugspitze (Jerz and Poschinger, 1995). The limestone is fine-grained, dolomised, has a porosity of approximately 4.4 % and shows little heterogeneity in terms of its lithological properties (Krautblatter et al., 2010). Seven pairs of rock cylinders with a diameter of  $148 \pm 1$  mm and a height of  $82 \pm 3$  mm were prepared. Following the ISRM (International Society for Rock Mechanics and Rock Engineering) recommendations standardised tests, the roughness of the specimen's surfaces was produced using abrasive grinding powder with a grit of 80 grains per inch (FEPA, Federation of European Producers of Abrasives Standard) leading to a roughness amplitude equivalent to the mean diameter of the abrasive grains of  $0.185$  mm. Consequently, the rock surfaces are reproducible and close to the conditions of fractures in the field. The uniform joint surface roughness prohibits any potential effect of differing rock types on the shear strength results. Rock cylinders were saturated in a water basin under atmospheric pressure for at least 72 h.

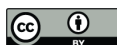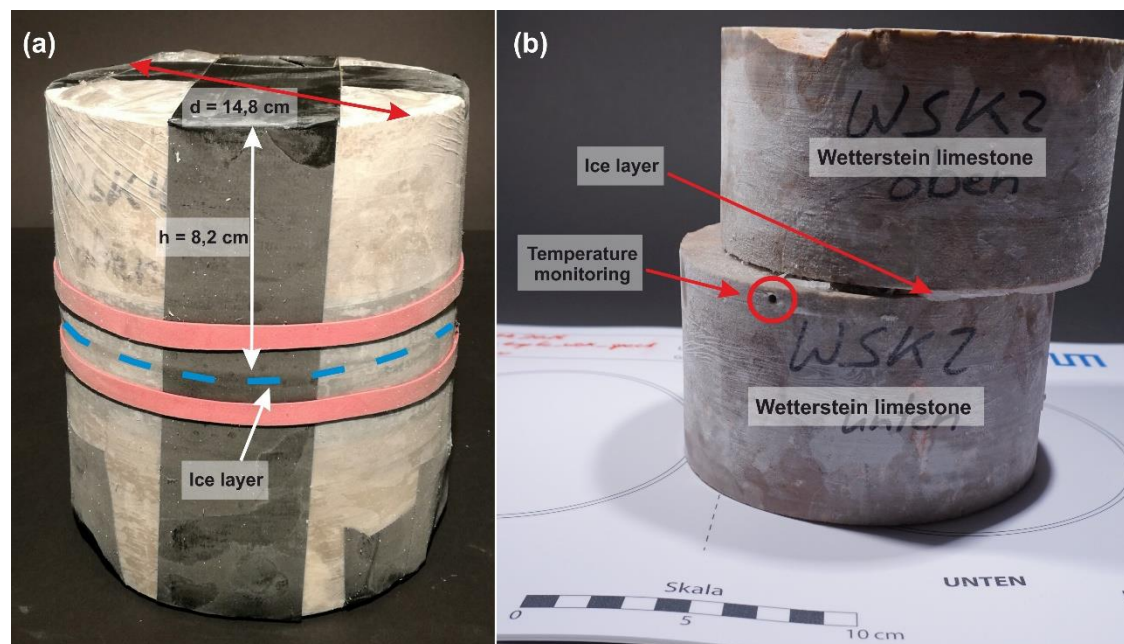

Figure 2: Sandwich sample before (a) and after (b) shearing.

The rock-ice-rock sandwich samples were produced by freezing two cylinders of Wetterstein limestone with a gap filled with tap water, using matchsticks as spacers. The samples were subjected to a number of pre-tests to guarantee uniform conditions. Pre-tests showed that simultaneous freezing of the interlocking rock surface and the ice surface is necessary to generate a firm contact. The gap was wrapped with tape and transparent film to prevent water flowing out (Fig. 2a). The  $3 \pm 1$  mm-thin ice layer resembles the thin nature of most encountered infillings and provokes fracturing, as thicker ice infill produces more creep camouflaging the fracturing behaviour. Our experiments (including the pre-tests) have shown that unavoidable thickness variations of  $\pm 1$  mm yield no significant differences in fracture toughness (Fig. S1a). In other shear experiments, the shear strength of sandwich samples with a 1 mm thick ice layer did also not differ significantly from the results of concrete-ice specimens representing a 25 mm thick ice infilling (Günzel, 2008). samples were frozen for at least 14 h at  $-14$  °C to ensure that the ice layer was entirely frozen and firmly attached to the rock surfaces. During the freezing process, the shear planes and the gap for the ice layer were oriented vertically to make sure that no air bubbles could form in the ice. A hole was drilled into the lower rock cylinder (Fig. 2b) to monitor the rock temperature during the shear test with a  $0.03$  °C precision Pt100 sensor (Greisinger GMH 3750).





## 2.3 Experimental setup

After freezing, the sandwich specimens were fixed within the upper and lower ring of the RDS-100 direct rock shear machine from GCTS (Geotechnical Consulting & Testing Systems; Fig. 3a). The ice layer position then corresponded to the open gap between the upper and the lower shear ring (Fig. 3b). Consequently, failure within the ice layer or along the ice-rock-interface is provoked.

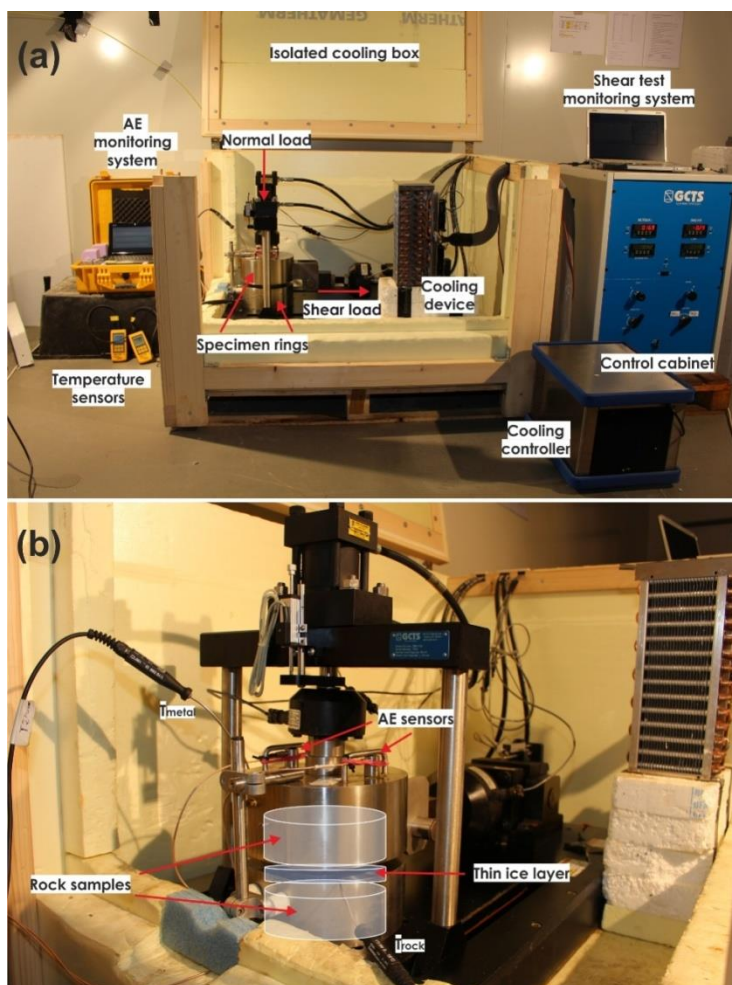

Figure 3: Experimental setup showing the laboratory shear machine, acoustic emission monitoring system, the cooling device and the cooling box.

During the whole test campaign, did not change the constellation of specimen pairs and always placed them identically oriented into the shear frame to prevent effects of variations in the surfaces of the shear planes. The machine is embedded in an isolated box in which temperature can be hold constantly at a specified level between  $-10\text{ }^{\circ}\text{C}$  and  $-0.5\text{ }^{\circ}\text{C}$  by a custom-

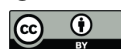

designed FRYKA cooling device. The cooling operation is controlled by a Pt 100 sensor placed inside the rock sample with 0.1 °C accuracy (Fig. 3b). The experiments were performed at temperatures -0.5, -1, -2, -3, -4, -5, -6, -8 and -10 °C. Ventilation prevents thermal layering inside the cooling box. An AE monitoring system with two sensors is fixed at the top of the upper specimen ring (Fig. 3b) to record the elastic waves generated during fracturing events. Due to the external hydraulic control, AE can be better recorded than in servo-controlled devices. The hydraulically driven normal load and shear velocity are adjusted by the rock shear machine and were held at constant levels during the shear tests. Normal stress levels of 100, 200, 400 and 800 kPa were applied. Tests at 800 kPa were performed to study a potential gradual stress-dependent transition from brittle fracture to creep at stress levels above 400 kPa. This transition is observed with increasing confining pressure in triaxial tests (Sanderson, 1988) and with increasing normal stress in uniaxial shear tests (Günzel, 2008) and is expected under the similarly tested normal stress conditions above 400 kPa. The mean horizontal displacement rate was  $0.7 \pm 0.1$  mm/min, corresponding to a mean strain rate of  $0.7 \pm 0.2 \cdot 10^{-3} \text{ s}^{-1}$ . This strain rate provokes brittle failure inside the ice or along rock-ice contacts and corresponds to predefined sliding planes at the accelerating failure stage of rockslides (Arenson and Springman, 2005a; Krautblatter et al., 2013; Sanderson, 1988). As the shear and compressive strength of pure and dirty ice increase with the strain rate (Arenson et al., 2007; Sanderson, 1988; Schulson and Duval, 2009), variations in the shear rate were kept as low as possible (with  $\pm 0.1$  mm/min) and had no measureable influence on the shear strength at failure (Fig. S1b). These conditions were applied to all tested stress and temperature conditions. During the shear tests, normal load, shear load, normal deformation and shear deformation were recorded and used to calculate normal and shear stress considering the changing area of contact  $A_{\text{contact}}$  (Fig. S2):

$$A_{\text{contact}} = 2 \left( r^2 \cos^{-1} \left( \frac{\varepsilon}{2r} \right) - \frac{\varepsilon}{4} (4r^2 - \varepsilon^2)^{1/2} \right) \quad (4)$$

with specimen radius  $r$  (mm) and shear strain  $\varepsilon$  (mm).

Between one and six experiments were performed for each test condition characterised by a specific temperature and normal stress level (Table S1). The total number of tests was 141, significantly more than the cumulative number of the tests in all previously published studies on rock-ice failure. Normal stress levels of 100, 200 and 400 kPa were applied for the whole temperature range whereas 800 kPa was tested for temperatures from -4 to -0.5 °C.

## 2.4 AE monitoring

For measuring the acoustic activity, a two-channel high-frequency acquisition system composed of two USB Acoustic Emission Nodes (Mistras, Physical Acoustics) employing a single channel AE digital signal processor with 16-bit resolution and 10 V maximum amplitude, was used. The AE sensors were coupled to the specimen holder using silicone-free lubricating grease (Glisseal HV, Borer Chemie). The AE piezo-electrical sensors (PK6I) provided an operating frequency range of 40–70 kHz with a resonant frequency of 55 kHz. They included a pre-amplifier of 26 dB and were connected to the USB AE node



with coaxial cables. The system was controlled by AEwin (Mistras, Physical Acoustics), a real-time data acquisition software. The system sampled continuously with 1 MSPS (mega samples per second), while events over a fix threshold of 70 dB were recorded. The signal characteristics (timestamp, rise time, amplitude, pulse count, energy and length) was parameterised according to (Girard et al., 2012, Fig. 1).

## 2.5 Uncertainty analysis of shear strength at failure, cohesion and friction

The linear fitting is estimated by a linear regression model using the LinearModel class of MATLAB. The predictor and response variable are arithmetic means, while only the predictor variable is weighted with the reciprocal value of its variance. Beside the correlation coefficient ( $r$ ) and the coefficient of determination ( $R^2$ ), the MATLAB function returns the regression parameters “intercept” and “slope” with its standard error (MathWorks, 2017).

## 3 Results

### 3.1 Typical behaviour of shear stress, shear deformation and acoustic signals

A representative time series for shear stress, shear deformation and AE activity is shown in Fig. 4. A selection of additional time series is displayed in Fig. S3.

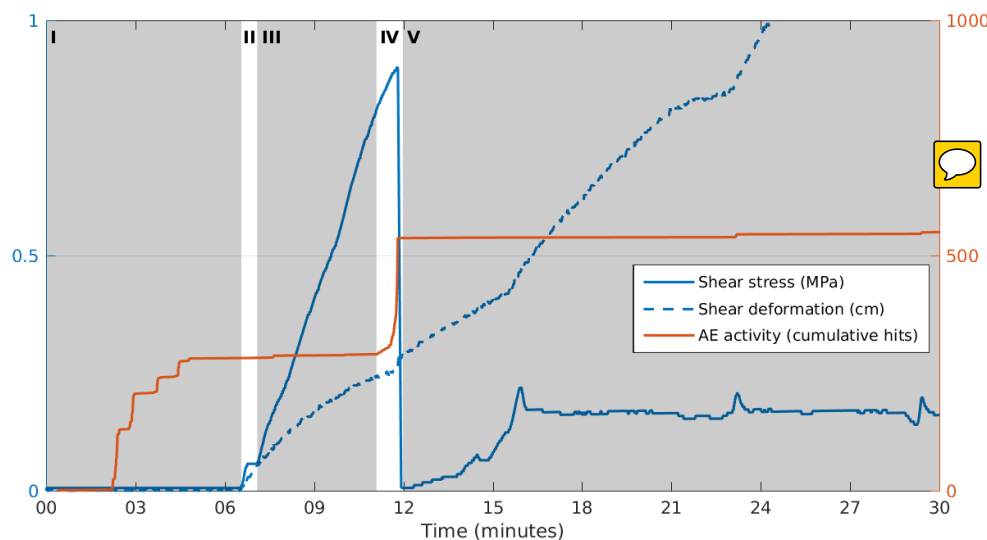

**Figure 4: Typical curves of shear stress at failure, shear deformation and acoustic activity for a shear test at  $T = -3\text{ °C}$  and  $\sigma = 200\text{ kPa}$ . I-V represent the typical stages of each experiment: Consolidation (I), sample fitting to shear rings (II), pre-peak shear deformation (III), shear failure (IV) and post-peak shear strength. Rupture is clearly detectable by the strong decrease in shear stress. An increase in the evolution of the cumulative AE hits can be observed before rupture.**

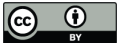

In Stage I, the experiment starts with a consolidation of approximately five minutes applying the specified normal load. After initial AE activity during initial consolidation (starting after 2–3 minutes, Fig. 4), the AE hit rate decreases again to almost zero (after five minutes, Fig. 4) before entering Stage II. Shearing starts, the shear rings gain tight fit to the sample and then start to apply the stress. In Stage III, shear stress increases without significant changes in AE hit rate corresponding to elastic and ductile ice deformation. In Stage IV, a pronounced peak shear stress is observed in all experiments after a few minutes coinciding to a pronounced rise in AE hit rate that indicates brittle deformation. Correspondingly, the ice infill between the rock cylinders fails and shear deformation reaches its maximum value. The moment of failure can also be identified by a clearly audible cracking. In Stage V, just after failure, the shear stress suddenly drops to a minimum, then rises again and quickly reaches a plateau of residual shear stress. In a few experiments (such as in Fig. 4), the post-failure shear stress exhibits several small peaks, which are often accompanied by an increase in AE hits and audible cracking (ice healing).

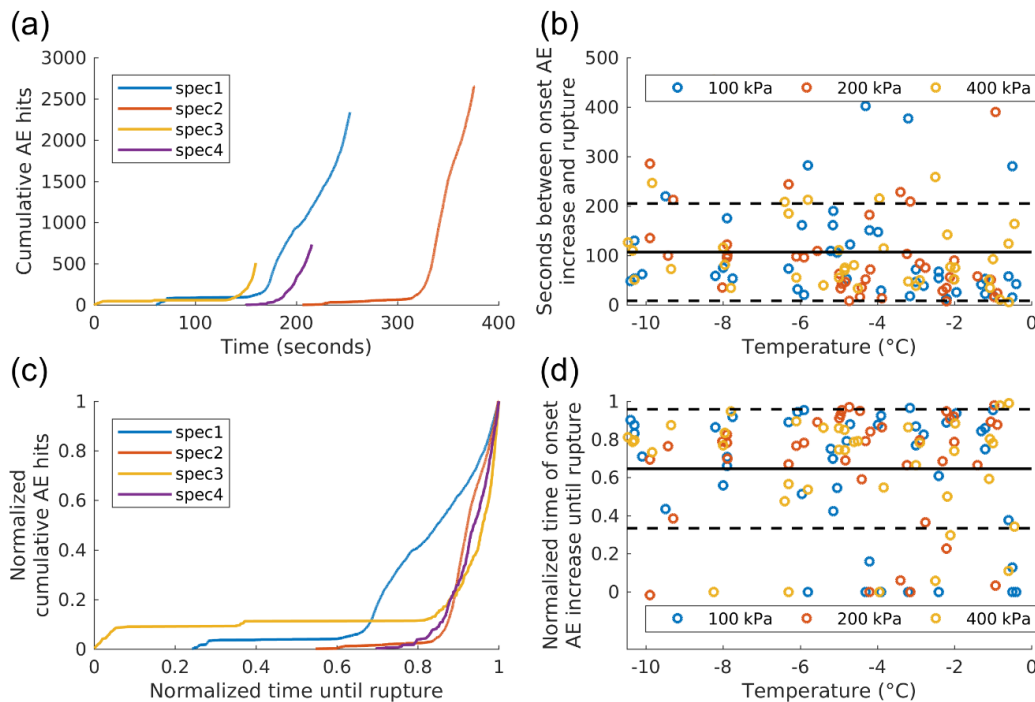

**Figure 5: Time series of (a) cumulative AE hits and (c) normalised cumulative AE hits with 400 kPa normal stress and at -4°C. Further, the temperature-dependent time between onset of AE increase and rupture is displayed in seconds (b) and normalised (d). The black lines indicate the overall mean while the dashed lines indicate the standard deviation range. Tests at 800 kPa were not considered in (b) and (d) because they were only conducted at temperatures between -0.5 and -4 °C.**

The number of AE hits usually increases very suddenly and sharply just before rupture (Fig. 5a and Fig. 5c). The average offset between the onset of AE hit increase and fracturing (i.e. Stage IV) is  $107 \pm 98$  sec (Fig. 5b). In all the experiments, the onset of AE hit increase occurs when  $65 \pm 31$  % (mean value with standard deviation) of the time between shear start and failure has

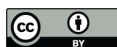

passed (Fig. 5d). However, in some experiments at temperatures between  $-4$  and  $-0.5$  °C, the AE hit increase starts even earlier than within the standard deviation of 31 % (outliers < 34 %). The lag in absolute and relative time shows a weak correlation to temperature, though it is not dependent on normal stress.

To analyse the scaling properties of the AE energy, we calculated the distribution for each experiment condition, combining the data of all experiments with the same condition to enlarge the number of events. The probability density functions (PDFs) of event energy show a power-law behaviour spanning 3–5 orders of magnitude (Fig. S4). The exponent  $b$  is between 1.6 and 1.9 for the different conditions, but it does not show any relation to temperature or normal load. As a result, it does not indicate any stress- or temperature dependence of the size of fracturing events.

### 3.2 Observed failure type and temperature-dependence

Three types of failure could be observed during the shearing tests: i) Fracture along the rock-ice interfaces (Fig. S5a), ii) fracture within the ice layer and iii) a composite fracture type of i) and ii) (Fig. S5b). In the first type, the entire ice infill stuck to either the upper or the lower rock cylinder, whereas in the second case the rock surfaces were unaffected by failure. The last fracture type refers to specimens whose ice layer broke transversely and was separated so that the rear portion remained at the lower cylinder and the front part stuck to the upper one.

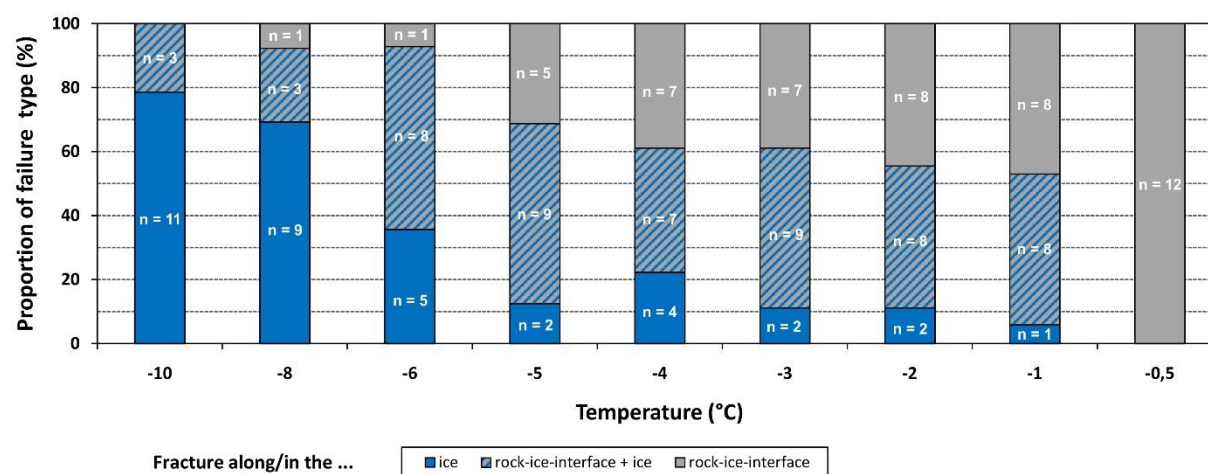

**Figure 6: Proportions and absolute numbers of fracture types plotted at temperatures from  $-10$  °C to  $-0.5$  °C (for tests at 100–800 kPa). Failures inside the ice dominate at low temperatures whereas failure along rock-ice interfaces become more important close to 0 °C.**

With temperatures rising from  $-8$  to  $-0.5$  °C, the percentage of tests with fracture along the rock-ice interface increase from 8 to 100 % (Fig. 6). At  $-0.5$  °C it constitutes the only failure type. However, the lower number of tests at this temperature level has to be considered. Vice versa, the proportion of fracturing within the ice infillings increases with decreasing temperature





from 6 % at -1 °C to 79 % at -10 °C. At -9 and -10 °C, it is the dominating failure type. The composite failure type shows no clear trend, either with decreasing or with increasing temperature. 

### 3.3 Shear stress at failure and temperature-dependence

330 At all classes of normal stress (100–800 kPa) the shear stress at failure decreases with increasing temperature (Fig. S6). The decrease of shear stress at failure when warming is shown in Table 1 for each tested normal stress condition. The calculated total decrease at stresses 100–400 kPa ranges between 63.5 and 78.1 % and refers to a warming from -10 to -0.5 °C. The maximum decrease at 800 kPa measures 60.1 % and refers to temperatures from -4 to -0.5 °C. The coefficients of determination  $R^2$  range from 0.44 to 0.75.

335

Table 1

### 3.4 Developing a temperature-controlled brittle failure criterion for ice-filled permafrost rock joints

340 Shear stress at failure versus normal stress was plotted for temperatures from -10 to -0.5 °C and normal stresses from 100 to 400 kPa (Fig. 7a) and additionally for temperatures from -4 to -0.5 °C and normal stresses from 100 to 800 kPa (Fig. 7b). Tests at 800 kPa were performed to study a potential stress-dependent transition from brittle fracture to creep at stress levels above 400 kPa. For this purpose, a smaller temperature range from -4 to -0.5 °C was tested representing most of the recently measured annual mean temperatures of Alpine and Arctic bedrock permafrost (Delaloye et al., 2016; Gallemann et al., 2017; Harris et al., 2003). In Fig. 7, the peak shear stresses generally increase with increasing normal stresses at all tested temperatures. The  
345 low values of  $R^2$  are partially an effect of the tests clustering around the four predefined stress levels. 

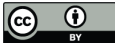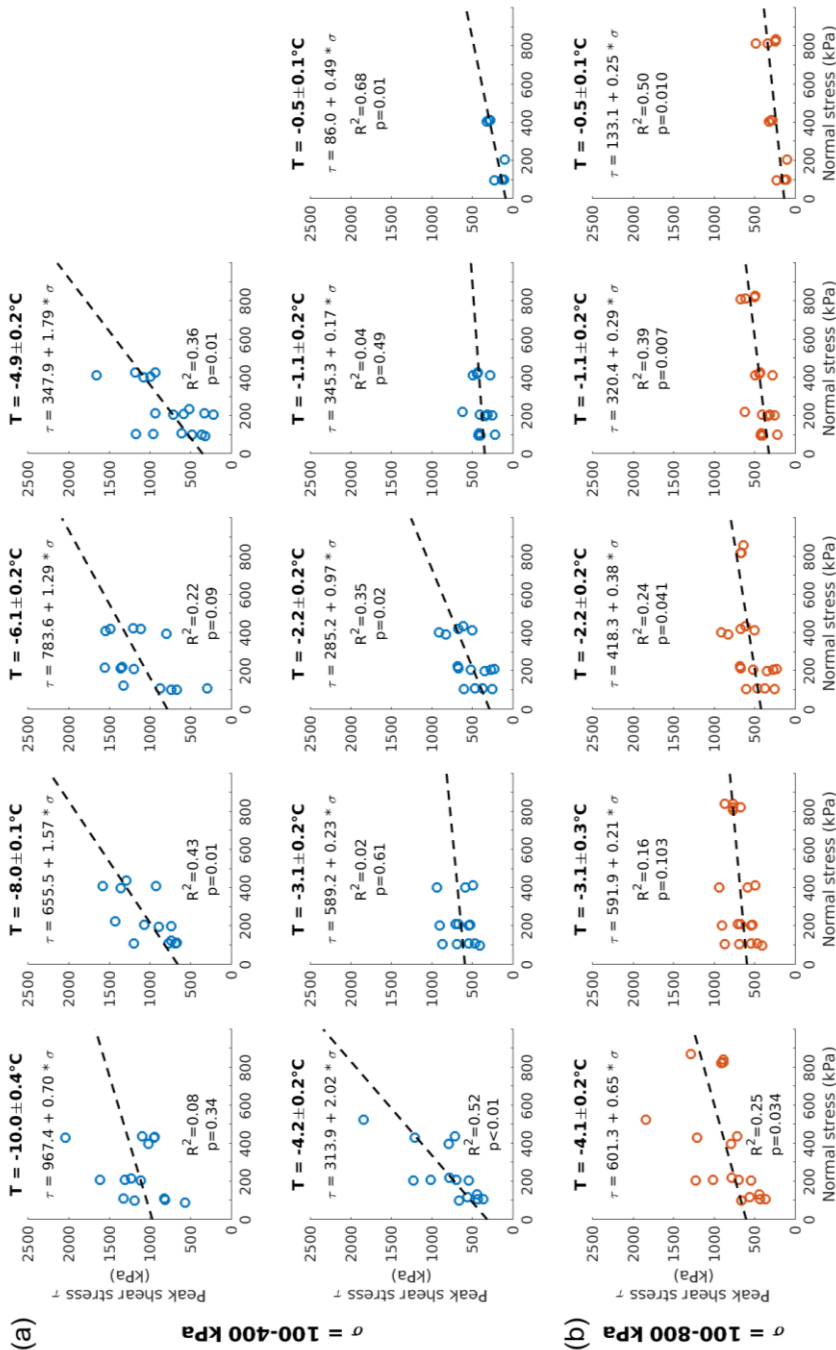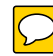

350 Figure 7: Measured peak shear stress at failure as a function of normal stress for temperatures between -10 and -0.5 °C. The temperature values are corrected by the means (including standard deviation) of the respective temperature level. (a) Normal stress levels of 100, 200 and 400 kPa were applied for the whole temperature range (blue circles). (b) 800 kPa was additionally tested between -4 and -0.5 °C (orange circles). The calculated regression lines were used to derive temperature-specific cohesion and friction values. p = Probability of rejecting the null hypothesis ( $H_0$ ) although it is true.



355 To develop a shear strength description of ice-filled permafrost rock joints we used the linear and stress-dependent Mohr-Coulomb failure criterion

$$\tau = \sigma' * \tan(\varphi) + c \quad (5)$$

360 which represents the shear stress at failure  $\tau$  as a function of the effective normal stress  $\sigma'$ , cohesion  $c$  and the friction angle  $\varphi$ . For the cohesion, we utilised Fig. 7 to derive the shear stress values at the intercepts of the regression lines with the abscissas for each temperature level. To determine the friction, we took the slope values from the linear regression functions which correspond to the coefficient of friction  $\mu$ . Values for the friction angle were derived by calculating the respective arctangents of  $\mu$ .

365 A temperature-dependent cohesion and friction for all test temperatures is displayed in Fig. S7. Here,  $R^2$ -values range between 0.61–0.92 for the cohesion and between 0.12–0.40 for the coefficient of friction. P-values measure 0–12 % for the cohesion and 7–57 % for the coefficient of friction. The ranges depend on the included stress levels and the temperature range tested. Due to these high uncertainties, we used only specific temperature levels with a statistical significance level of  $p \leq 5$  % for the elaboration of the Mohr-Coulomb failure criterion. The p-values had been calculated earlier for the relation between peak shear stress and normal stress at the tested temperature levels (Fig. 7). The temperature levels with p-values  $> 5$  % were excluded from further steps of the model development, as the corresponding peak shear stresses are considered to be not significantly dependent on the normal stress. Further, only the shear experiments from 100 to 400 kPa were utilised for the development of the failure criterion, as they cover the whole range of tested temperatures. This leads to a greater valid temperature range for the model and to a more robust correlation between cohesion or friction and temperature.

375

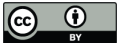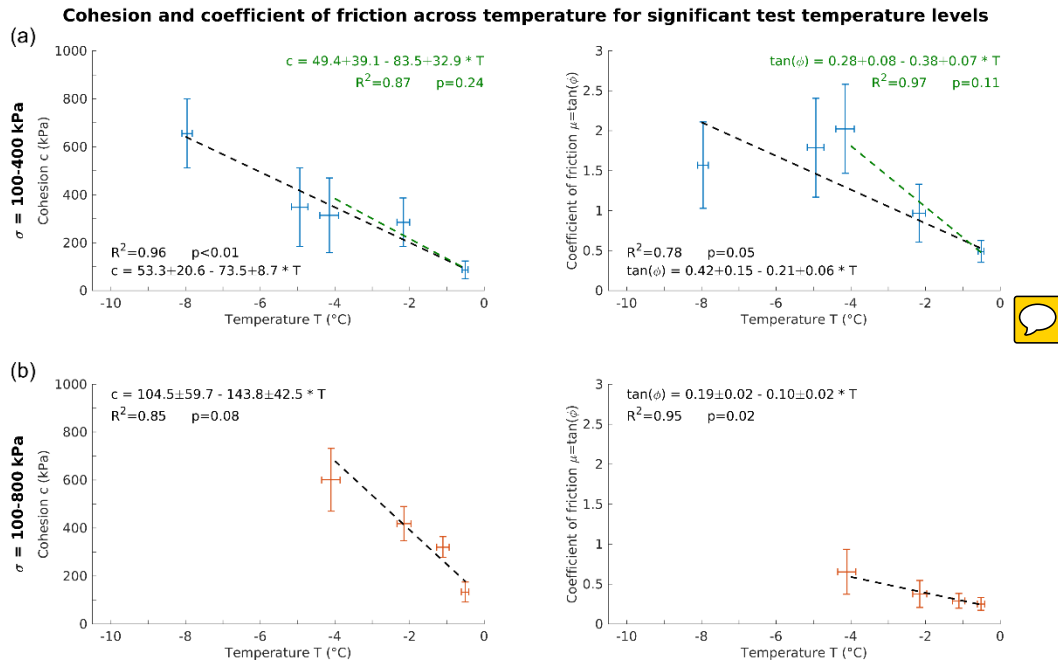

**Figure 8: Cohesion and friction of ice-filled rock joints as a function of temperature for significant temperature levels with a statistical significance level of  $p \leq 5\%$ . The crosses display the means and standard deviations of rock temperature and cohesion or friction, grouped by the tested temperature class. (a) Tests at normal stresses 100–400 kPa and temperatures -8 to -0.5  $^{\circ}\text{C}$  (blue crosses). (b) Tests at normal stresses 100–800 kPa and temperatures -4 to -0.5  $^{\circ}\text{C}$  (orange crosses). The dashed lines represent the linear regression functions, which were inversely weighted with the squared standard errors. The green regression lines in (a) refer to a temperature range from -4 to -0.5  $^{\circ}\text{C}$ .**

Fig. 8 shows the temperature-dependent cohesion and friction of ice-filled rock joints for temperature levels with  $p \leq 5\%$  (Fig. 7). Here, the temperature-dependent loss of cohesion of ice-filled rock joints is described by

$$c [\text{kPa}] = 53.3 - 73.5 * T \quad (6)$$

where  $T$  ( $^{\circ}\text{C}$ ) is the temperature of the ice-filled joint at failure, valid for temperatures from  $-8 \pm 0.1$   $^{\circ}\text{C}$  to  $-0.5 \pm 0.1$   $^{\circ}\text{C}$  and normal stresses from 100 to 400 kPa (Fig. 8a).

Table 2

When approaching the melting point, the cohesion decreases by 86 % from -8  $^{\circ}\text{C}$  to -0.5  $^{\circ}\text{C}$  (Table 2). Equation (6) exhibits a decrease in cohesion of 74 kPa/ $^{\circ}\text{C}$  due to warming, which refers to a reduction by 12 %/ $^{\circ}\text{C}$ . The temperature-dependent friction coefficient can be expressed by



$$\mu = 0.42 - 0.21 * T \quad (7)$$

where  $T$  ( $^{\circ}\text{C}$ ) is the temperature of the ice-filled fracture at failure, valid for temperatures between  $-8 \pm 0.1$   $^{\circ}\text{C}$  to  $-0.5 \pm 0.1$   $^{\circ}\text{C}$  and normal stresses from 100 to 400 kPa (Fig. 8a). The coefficient of friction falls by 75 % with increasing temperature from  $-8$   $^{\circ}\text{C}$  to  $-0.5$   $^{\circ}\text{C}$  (Table 2). The corresponding friction angle decreases by 60 % ( $64.5$ – $27.7^{\circ}$ ). This equation shows a warming-dependent loss of friction of  $0.21/^{\circ}\text{C}$  corresponding to a reduction by 10 %/ $^{\circ}\text{C}$ .

Combining Eq. (6) and (7) in a Mohr-Coulomb failure criterion (Eq. (5)), we can describe a temperature- and normal stress-dependent shear stress at failure  $\tau$  (kPa) for ice-filled rock joints

$$\tau [\text{kPa}] = \sigma' * (0.42 - 0.21 * T) + (53.3 - 73.5 * T) \quad (8)$$

where the friction angle is the arctangent of  $\mu$  while both friction ( $0.42 - 0.21 * T$ ) and cohesion ( $53.3 - 73.5 * T$ ) respond to a temperature increase. This formula is valid for normal stresses between 100 to 400 kPa and temperatures between  $-8 \pm 0.1$   $^{\circ}\text{C}$  to  $-0.5 \pm 0.1$   $^{\circ}\text{C}$ .

### 3.5 Cohesion and friction for normal stresses between 100 and 800 kPa

When comparing the loss of friction and cohesion for normal stresses 100–400 kPa with the loss for 100–800 kPa, both in the same temperature range of  $-4$  and  $-0.5$   $^{\circ}\text{C}$ , the following can be observed (Fig. 8, Table 2): (i) The absolute reduction in cohesion is more pronounced for tests including all normal stress levels. (ii) The absolute decrease in friction is stronger for tests excluding 800 kPa. (iii) Percentage decreases are nearly the same for both groups of tests.

## 4 Discussion

Our experimental results generally show decreasing shear strength of ice-filled rock joints with increasing temperature and decreasing normal stress. We use these data to develop a new brittle failure criterion for ice-filled permafrost rock joints which is based on Mohr-Coulomb and shows that both, the cohesion and the friction angle, are temperature-dependent and decrease with increasing temperature ( $R^2 = 0.96$  for the cohesion and  $R^2 = 0.78$  for the friction). Similar tendencies have been indicated by previous studies of the shear strength of ice-filled rock joints (Davies et al., 2000; Davies et al., 2001; Günzel, 2008; Krautblatter et al., 2013). However, all of these studies were performed with a much smaller number of experiments and with concrete as rock analogue; further, their results have not yet been combined to a comprehensive failure criterion.





#### 4.1 Real-world conditions of permafrost rock slope destabilisation simulated by the new failure criterion

The experiments presented apply to real-world rock-ice fracturing in rock slope failures (i) with ice-filled failure planes in a depth of 4 to 15 m, i.e. mainly below the active layer and shallower than the ice fracturing suppression in favour of creep deformation of ice, (ii) with virtually all realistic Alpine and Arctic permafrost bedrock temperatures between  $-0.5^{\circ}\text{C}$  and  $-10^{\circ}\text{C}$  and (iii) with fast displacements ( $0.7 \pm 0.1$  mm/min) coinciding with the final accelerating failure stage. Rock-ice fracturing certainly dominates rock failure volumes of  $\leq 23.000$  where all ice-filled failure planes are  $\leq 15$  m deep (Sect. 1), but it might also play an important role for larger failures, where just a certain proportion of ice-filled failure planes is  $\leq 15$  m deep. As we assume that the shear strength along ice-filled rock joints is independent of the rock type, the tests presented simulate rock-ice fracturing along joints of all rock types. Anyhow, a potential shear strength dependence on different rock types has to be tested in additional experiments.

Our experiments simulate the final accelerating stage of rock slope failure where the structure of the ice infillings is deformed by intense shear displacement. The ice infill at the start of the shear tests reproduces an ice-filled joint that has already been loaded and deformed by uniaxial compression. This is somehow similar to polycrystalline ice in natural fractures as ice has a high capacity to perform self-healing and thus deletes previous deformation-induced imperfections. At strain relaxation, the ice-bonding heals itself within hours and days due to refreezing and causes a strengthening of the sample (Arenson and Springman, 2005a; Sanderson, 1988); thus a sample with a pre-set normal stress is similar to an ice-filled fracture under similar conditions irrespective of the deformation history.

If we leave the range of considered boundary conditions in terms of (i) lower temperatures, (ii) lower strain rates or (iii) higher normal stresses, fracturing along ice-filled permafrost rock joints will presumably not occur: (i) Tests at temperatures below  $-10^{\circ}\text{C}$  were not performed because measured daily and annual mean temperatures at various Alpine and Arctic permafrost bedrock sites do not drop below  $-10^{\circ}\text{C}$  at depth (Böckli et al., 2011; Delaloye et al., 2016; Harris et al., 2003). (ii) The samples were sheared with high strain rates of  $10^{-3} \text{ s}^{-1}$  provoke brittle failure of ice and rock-ice contacts. At lower strain rates, stress concentrations along the shear zone can be relaxed and the mechanical behaviour changes to ductile creep deformation without fracturing (Arenson and Springman, 2005a; Arenson et al., 2007; Krautblatter et al., 2013; Renshaw and Schulson, 2001; Sanderson, 1988;). (iii) A potential gradual stress-dependent transition from brittle fracture to creep, which is observed with increasing confining pressure in triaxial tests (Sanderson, 1988) and with increasing normal stress in uniaxial shear tests (Günzel, 2008), is expected under the similarly tested normal stress conditions above 400 kPa. In our experiments, all sandwich shear samples, including those at 800 kPa normal stress, only failed by fracturing, presumably due to the elevated strain rate of  $10^{-3} \text{ s}^{-1}$  leading to fracture. It appears that the transition from shear fracturing to creep is not only stress-dependent but also strain-rate-dependent within a certain transition level of normal stress (Sanderson, 1988). Other reasons for the unexceptional fracture-dominated failures are that the simulated rock overburden of 30 m may be still within the transition depth and seems to favour fracturing at elevated strain rates. It is certainly interesting to systematically analyse the strain-rate dependent brittle fracture-creep transition beyond 800 kPa normal stress in detail in an additional study but this is beyond the scope of this study.



460 The joint surface roughness and ice layer thickness may be varied in further studies to assess their influence on the shear strength of ice-filled rock joints and the failure behaviour.

## 4.2 Validation of the new failure criterion for temperature- and stress-dependent fracturing along ice-filled rock joints

465 The new derived failure criterion (Eq. (8)) describes the shear strength of ice-filled fractures in all types of rock and combines a temperature-dependent cohesion and friction angle. A temperature-dependence of both, the cohesion and friction angle, has not been demonstrated yet, but for pure ice (Fish and Zaretzky, 1997). However, other publications have either postulated a temperature-dependence of the cohesion of ice-rich soils (Arenson and Springman, 2005b; Arenson et al., 2007) or a temperature-dependence of the friction coefficient of granite-ice interfaces (Barnes et al., 1971). Here, we develop a failure criterion for rock-ice interfaces that contains both a temperature-dependent coefficient of friction and an even stronger temperature-dependent cohesion.

470 Figure 9 depicts the new Mohr-Coulomb failure criterion (Eq. (8)) with the range of uncertainty for the different temperature levels tested and corrected by their true means (including standard deviation). The means of the measured peak shear stress values, represented by the intersections of the error bars of normal stress and peak shear stress, mostly correlate well with the calculated failure criterion and the respective error ranges. Statistical dispersion measures of the measured peak shear stress values around the failure criterion are shown in Table S2. Best accordance is achieved for the shear stress means used for model calibration (correspond to significant temperature levels with  $p$ -values  $\leq 5\%$ ). The mean absolute deviation (MAD) and coefficient of variation (CV) range between 40–146 kPa and 8.8–24.6 % respectively. The experiments at temperatures -1, -3, -6 and -10 °C (with  $p$ -values  $> 5\%$ ), which had been excluded from the elaboration of the failure criterion, were used for validation. Their shear stress means show higher deviations from the failure criterion, i.e. the MAD and the CV range from 98 to 252 kPa and from 15 to 43.5 % respectively. For normal stresses 100–400 kPa, the model seems to show a robust fit even with values not included in the initial model development data set. The means of peak shear stress at 800 kPa mostly lie within the calculated error margins, but at their lower boundaries. This demonstrates the mechanical parameters controlling the failure behaviour start to change at higher normal stresses (800 kPa) and temperatures close to the melting point.

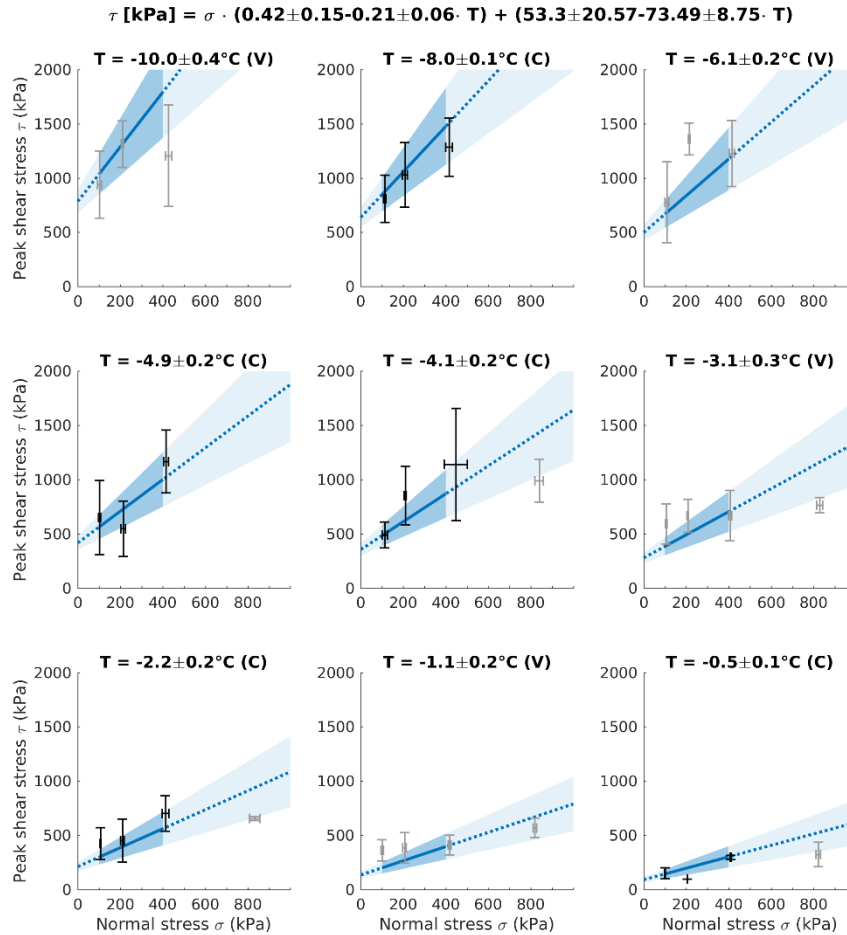

**Figure 9: Validation test for the new Mohr-Coulomb failure criterion for ice-filled rock joints (Eq. (8)).** The black and grey crosses represent means and standard deviations of normal stress and peak shear stress, grouped by the tested normal stress classes 100, 200, 400 and 800 kPa. C = Calibration temperature level that was used for the model as  $p \leq 5\%$  (black crosses). V = Validation temperature level that was excluded from the elaboration of the failure criterion because  $p > 5\%$  (grey crosses). As tests at 800 kPa were excluded from the development of the failure criterion, they also serve as validation (grey crosses). Solid blue lines and dark blue areas represent the calculated failure criterion and respective error ranges within the valid normal stress range. Dotted blue lines and light blue areas are extrapolations of the failure criterion and error margins beyond the valid normal stress range.

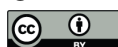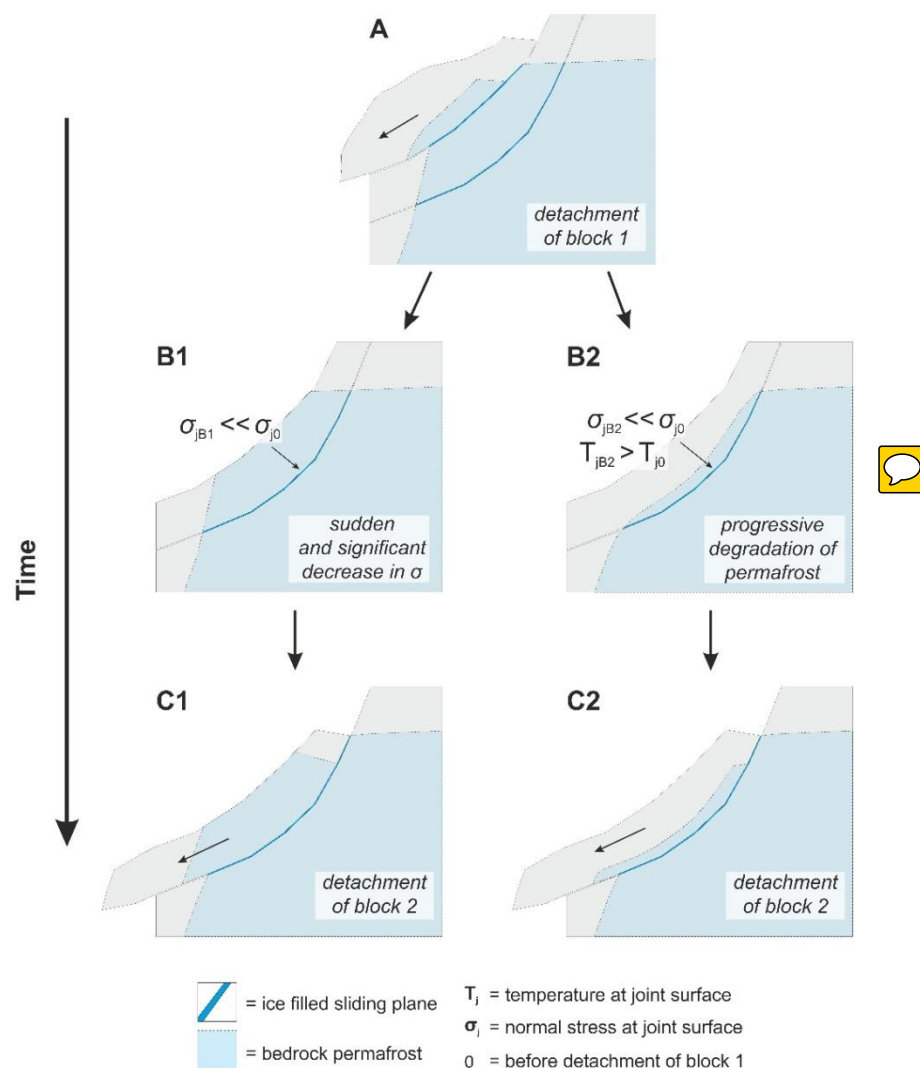

495 **Figure 10: Progressive failure in a warming permafrost rock slope displaying thermal and normal stress conditions before and after detachment of a first slab. Both (B2) progressive thermal warming (i.e. permafrost degradation), but even faster (B1) sudden unloading can initiate failure.**

This study shows that both warming and unloading of ice-filled rock joints, lead to a significant drop in shear resistance, which may cause a self-enforced rock slope failure propagation. The progressive degradation of bedrock permafrost and ice in rock joints may control the cohesion and friction angle of the joints. However, as soon as a first slab has detached from the rock slope (A in Fig. 10), further slabs below can become unstable and finally detach as the shear strength along the ice-filled failure plane is affected by (B2 in Fig. 10) progressive thermal warming (i.e. permafrost degradation), but even faster by (B1 in Fig. 10) sudden unloading. The latter is represented by a significant drop in normal stress in the Mohr-Coulomb failure criterion.



505 A–C1, A–C2 or a combination of both may also be possible scenarios for the observed rockslide at the Zugspitze summit crest, once the movement of the unstable rock mass accelerates.

### 4.3 Failure types

Three types of failure were identified: Fracture along the rock-ice interfaces, fracture within the ice layer and a composite type. From a practical point of view, Eq. (8) has to include all types of failure due to five main reasons: (i) We cannot observe what  
510 types occur in natural systems. (ii) A specific stress, strain or temperature condition could not be assigned explicitly to one of the failure types. (iii) Along spatially extensive rock joints, all these failure types coexist and coincide. (iv) All three types together fit in a failure criterion, showing that they converge to a range of values under given temperature and stress conditions. (v) It is physically impossible to constrain the exact fracturing plane in a sub-millimetre range away from the rock-ice interface. In this study we observe a tendency of temperature-dependence of the distinct failure types: when comparing fractures in the  
515 ice with fractures along the rock-ice contact, tests with the first failure type rather dominate at cold temperatures between -10 to -6 °C, while the proportion of tests with fracture along the rock-ice-interface dominate at higher temperatures between -5 to -0.5 °C. This behaviour is similar to the pattern observed by Jellinek (1959), albeit at lower temperatures, showing “cohesive breaks” (comparable with fracture within the ice infilling) of ice-steel interfaces at temperatures colder than -13 °C and “adhesive breaks” (equal to fracture of rock-ice interfaces) at temperatures warmer than -13 °C. Previous publications highlight  
520 three potential reasons for this pattern that explains the formation of liquids, which may support the failure of rock-ice-contacts at warmer conditions: (i) Above -3 °C the deformation of ice is increasingly influenced by pressure melting (Hobbs, 1974), which can be pronounced in regions of stress concentration along the shear plane (Arenson and Springman, 2005a; Arenson et al., 2007). (ii) In porous media, curvature-induced and interfacial pre-melting (caused by long-range intermolecular forces between different materials and phases) leads to a depressed equilibrium freezing temperature. An unfrozen liquid melt film,  
525 several nanometres thick, forms at the ice-solid-interface at -1 °C, increasing its thickness when approaching 0 °C (Rempel et al., 2004). (iii) Grain boundary sliding occurs at temperatures above approximately -10 °C, which generates heat by friction (Hobbs, 1974) and may additionally support the formation of this liquid like layer along the rock-ice interface.

### 4.4 Cohesion and friction for normal stresses including 800 kPa

~~Due to the fact that at higher stresses significantly exceeding 400 kPa brittle fracturing can be suppressed in favour of creep~~  
530 ~~behavior, we also conducted experiments at 800 kPa.~~ Combining the 100–400 kPa with the 800 kPa tests results in a higher (absolute) reduction of cohesion and a lower (absolute) loss in friction with increasing temperature (Fig. 8). The relatively low peak shear stress values at 800 kPa normal stress flatten the linear regression curves and raise their intercepts with the abscissas (Fig. 7b). This behaviour can presumably be explained due to an enhanced pressure melting effect at higher normal stresses and temperatures close to 0 °C leading to liquid formation along the rock-ice interface and decreasing the friction (see also  
535 Sect. 4.3; Arenson and Springman, 2005a; Barnes and Tabor, 1966; Hobbs, 1974). This hypothesis is supported by two findings: (i) Failures along the rock-ice contact dominate at higher temperatures between -0.5 and -5 °C (Fig. 6). (ii) The





proportion of rock-ice failures to all failure types is 42 % for normal stresses 100–400 kPa and temperatures from -0.5 to -4 °C. The corresponding proportion for the same temperature range and normal stresses 100–800 kPa is 51 %. When tests at 800 kPa are added, particularly the rock-ice failures increase in numbers whereas failures within the ice are not affected. At normal stresses of 800 kPa and temperatures below -4 °C, the enhanced pressure melting effect may reduce and shear stresses are expected to rise significantly.

#### 4.5 AE activity as an indication for correlated damage, potentially preconditioning failure

AE is generally well capable to anticipate rock-ice failure as (i) all failures are predated by an AE hit increase, (ii) the hit rate increases well before brittle failure starts and (iii) it peaks immediately prior to failure. This manuscript clearly shows that precursors before failure can be observed by the AE technique providing complementary information to the displacement measurements. To exceed the AE trigger level, AE events have to be emitted from significantly large evolving microcracks and thus document microcrack generation and coalescence. It is interesting to consider that in ice, even secondary and tertiary creep are constituted by the generation and healing rate of microfractures (Paterson, 1994; Sanderson, 1988). The measured AE activity is, thus, an indication for damage increase, i.e. microcrack generation and coalescence (which can also be observed in the presented tests, Fig. S3) typical for cryospheric damage propagation (Murton et al., 2016). The culmination of progressive damage involves complex interaction between multiple defects and growing microcracks (Eberhardt et al., 1999; Senfaute et al., 2009; Sornette, 2006). An increase in the AE hit rate prior to failure accompanies the evolution of the internal damage and can therefore be used as a precursor signal.

The power-law distribution of the AE event energy, which shows only small variations for all different temperature and load conditions, indicates that strength heterogeneity, a main factor influencing this parameter (Amitrano et al., 2012), is similar for all tests at different conditions. Hence, neither a stress nor a temperature dependence of the size of fracturing events is expected in the tested conditions. A main challenge with AE monitoring is the absolute comparison of the event number and energy. The measured signal is strongly influenced by the coupling of the sensor with the medium. Additionally, the event triggering depends on the selection of an amplitude threshold. However, relative comparison (e.g. evolution of the hit rate) and statistical means (e.g. exponent  $b$ ) are not very sensitive to above-mentioned challenges, as long as enough events are detected.

At temperatures above -4 °C, a higher number of samples displayed an earlier start in fracturing before failure occurred. This trend is visible in the higher number of outliers below the standard deviation range and at temperatures above -4 °C (Fig. 5d). It may be explained by the lower shear strength of samples at warmer temperatures. Accordingly, at colder temperatures failure is increasingly characterised by a later onset of AE events because of higher shear strengths. Challenges remaining for field application of the recorded offset between the onset of AE hit increase and shear failure are (i) the positioning of the sensors and their density, (ii) the strength of the signal and (iii) the missing signal emission history prior to instrumentation.



## 5 Conclusions

570 Most of the observed failures in permafrost-affected rock walls are likely triggered by the mechanical destabilisation of warming bedrock permafrost including effects in ice-filled joints, which may evolve into potential shear planes supporting destabilisation and failure. To anticipate failure in a warming climate, we need to better understand how rock-ice mechanical processes affect rock slope destabilisation and failure with temperatures increasing close to 0 °C.

This paper presents a systematic series of constant strain-rate shear tests on sandwich-like limestone-ice-limestone samples (i) 575 to simulate the brittle failure of ice infillings and rock-ice interfaces along ice-filled shear planes of rockslides, ii) to study its dependence on temperature and normal stress and (iii) to develop a new brittle failure criterion for ice-filled permafrost rock joints. The setup and boundary conditions of our experiments are inspired by a 10<sup>4</sup> m<sup>3</sup>, ice-supported rockslide at the Zugspitze summit crest which potentially accelerates its movement in the future due to climate-induced permafrost degradation causing fracturing of ice and rock-ice contacts, among other processes. Our tests simulate the fracture of ice and rock-ice contacts that 580 may occur during failures of permafrost rock slopes (i) with volumes of ≤ 23.000 m<sup>3</sup>, (ii) with ice-filled shear planes in a depth of 4–15 m, (iii) with bedrock temperatures between -0.5 °C and -10 °C and (iv) with fast strain rates ( $0.7 \pm 0.2 \cdot 10^{-3} \text{ s}^{-1}$ ) coinciding with the accelerating final failure stage. Tests at a rock overburden of 30 m and temperatures from -4 to -0.5 °C were performed to study a potential stress-dependent transition from brittle fracture to creep. Of all the previous laboratory studies on the shear strength of ice-filled joints, the data set presented is the most extensive, containing 141 tests at nine 585 temperature and four normal stress levels. For the first time, pre-conditioned rock from a permafrost-affected rock slope was used.

Monitoring of AE activity during the shear tests was successfully used to describe the fracturing behaviour of rock-ice contacts focusing on the precursors of failure. A strong increase in the AE hit rate was measured shortly before failure ( $107 \pm 98 \text{ sec}$  in advance). The onset of an AE hit increase occurred when 65 % of the time between shear start and failure had passed.

590 The experimental results clearly show a decline in shear strength with decreasing normal stress and increasing temperature. At rock overburdens of 4 to 15 m, warming from -10 to -0.5 °C causes a decrease in shear strength by 64 to 78 %. At a rock overburden of 30 m and warming from -4 to -0.5 °C, shear strength decreases by 60 %. Warming drastically reduces the shear resistance of ice-filled rock joints and is thus a key process contributing to permafrost rock slope failure. We have developed a conceptual model for progressive failure that is initiated as soon as a first slab has detached from a rock slope; further slabs 595 below are subsequently destabilised by progressive thermal warming and even more quickly by sudden unloading.

For the first time, we have introduced a failure criterion for ice-filled permafrost rock joints that includes the fracturing of ice infillings, rock-ice interfaces and a combination of both. It is based on Mohr-Coulomb, it refers to joint surfaces which we assume similar for all rock types and it is valid for normal stresses 100–400 kPa and temperatures from -8 to -0.5 °C. The failure criterion contains a temperature-dependent cohesion and friction which decrease with increasing sub-zero temperatures. 600 Per increase of one °C the cohesion reduces by 12 % and the coefficient of friction by 10 %. The model fits well to the measured calibration means and even to the values excluded from the model development which mostly lie within or close to the

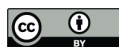

calculated error margin. Further, we show that the failure type depends on the temperature and is also affected by higher normal stresses (i.e. 800 kPa) above -4 °C which can presumably be explained by an enhanced pressure melting effect along the rock-ice interface.

605 The new failure criterion can be applied in numerical modelling and enables scientists and engineers to anticipate more accurately the destabilisation of degrading permafrost rock slopes, as it reproduces better real shear strength conditions along sliding planes. In this way, it may also be used for the assessment of Mohr-Coulomb shear parameters integrated into rock wall stability modelling of the permafrost-affected Zugspitze summit crest.

## 6 Data availability

610 All data concerning the tested samples, test conditions, time series of the shear experiments, acoustic emission and mechanical properties are available in the supplementary material as \*.xlsx or \*.pdf files.

## 7 Supplement link

## 8 Author contribution

Philipp Mamot, Samuel Weber and Michael Krautblatter designed the laboratory experiment. Philipp Mamot and Samuel  
615 Weber prepared the experimental setup as well as the rock samples. The experiment execution was supervised by Philipp Mamot, Samuel Weber and Michael Krautblatter. The tests were mainly carried out by Tanja Schröder. Philipp Mamot and Samuel Weber performed the data analysis and prepared the manuscript, both with a substantial contribution from Michael Krautblatter.

## 9 Competing interests

620 The authors declare that they have no conflict of interest.

## 10 Acknowledgments

The work was funded by the Technical University of Munich and Nano-Tera.ch (ref. no. 530659). We acknowledge Maximilian Marcus Rau, who supported the experiment execution in the context of his Bachelor's Thesis, and we thank Christina Utz for her support in performing experiments in the course of her student research project.

625



## 11 References

- Alava, M. J., Nukala, P. K. V. V. and Zapperi, S.: Statistical model of fracture, *Adv. Phys.*, 55, 349–476, doi: 10.1080/00018730300741518, 2006.
- Amitrano, D., Gruber, S. and Girard, L.: Evidence of frost-cracking inferred from acoustic emissions in a high-alpine rock-  
630 wall, *Earth Planet. Sc. Lett.*, 341–344, 86–93, doi: 10.1016/j.epsl.2012.06.014, 2012.
- Arakawa, M. and Maeno, N.: Mechanical strength of polycrystalline ice under uniaxial compression, *Cold Reg. Sci. Technol.*, 26, 215–229, 1997.
- Arenson, L. U. and Springman, S. M.: Triaxial constant stress and constant strain rate tests on ice-rich permafrost samples, *Can. Geotech. J.*, 42, 412–430, doi: 10.1139/t04-111, 2005a.
- 635 Arenson, L. U. and Springman, S. M.: Mathematical descriptions for the behaviour of ice-rich frozen soils at temperatures close to 0 °C, *Can. Geotech. J.*, 42, 431–442, doi: 10.1139/t04-109, 2005b.
- Arenson, L. U., Springman, S. M. and Sego, D. C.: The rheology of frozen soils, *Appl. Rheol.*, 17, 12147, 1–14, doi: 10.3933/ApplRheol-17-12147, 2007.
- Barnes, P. and Tabor, D.: Plastic flow and pressure melting in the deformation of ice I, *Nature*, 210, 878–&,  
640 doi:10.1038/210878a0, 1966.
- Barnes, P., Tabor, D. and Walker, J. C. F.: The friction and creep of polycrystalline ice, *P. R. Soc. London. Series A*, 127–155, 1971.
- Böckli, L., Nötzli, J. and Gruber, S.: PermaNET-BY: Untersuchung des Permafrosts in den Bayerischen Alpen. Teilprojekt PermaNET (EU Alpine Space Interreg IVb), Zürich, 60 pp., 2011.
- 645 Clauser, C. and Huenges, E.: Thermal conductivity of rocks and minerals, in: *Rock Physics & Phase Relations: A Handbook of Physical Constants*, Ahrens, T. J. (Eds.), American Geophysical Union, Washington, D. C., 105–126, 1995.
- Cox, S. J. D. and Meredith, P. G.: Microcrack formation and material softening in rock measured by monitoring acoustic emissions, *Int. J. Rock Mech. Min.*, 30, 11–24, doi: 10.1016/0148-9062(93)90172-A, 1993.
- Davies, M. C.R., Hamza, O., Lumsden, B. W. and Harris, C.: Laboratory measurement of the shear strength of ice-filled rock  
650 joints, *Ann. Glaciol.*, 31, 463–467, doi: 10.3189/172756400781819897, 2000.
- Davies, M. C.R., Hamza, O. and Harris, C.: The effect of rise in mean annual temperature on the stability of rock slopes containing ice-filled discontinuities, *Permafrost Periglac.*, 12, 137–144, doi: 10.1002/ppp.378, 2001.
- Delaloye, R., Hilbich, C., Lüthi, R., Nötzli, J., Phillips, M. and Staub, B.: Permafrost in Switzerland 2010/2011 to 2013/2014, *Glaciological Report (Permafrost) No. 12–15*, PERMOS, Cryospheric Commission of the Swiss Academy of Sciences,  
655 Fribourg, 85 pp., 2016.
- Deline, P., Gruber, S., Delaloye, R., Fischer, L., Geertsema, M., Giardino, M., Hasler, A., Kirkbride, M., Krautblatter, M., Magnin, F., McColl, S., Ravanel, L. and Schoeneich, P.: Ice Loss and Slope Stability in High-Mountain Regions, in: *Snow*



- and Ice-Related Hazards, Risks and Disasters, Shroder, J. F., Haeberli, W., Whiteman, C. (Eds.), Academic Press, Boston, 521–561, 2015.
- 660 Dramis, F., Govi, M., Guglielmin, M. and Mortara, G.: Mountain permafrost and slope instability in the Italian Alps: The Val Pola Landslide, *Permafrost Periglac.*, 6, 73–81, doi: 10.1002/ppp.3430060108, 1995.
- Dwivedi, R. D., Soni, A. K., Goel, R. K. and Dube, A. K.: Fracture toughness of rocks under sub-zero temperature conditions, *Int. J. Rock Mech. Min.*, 37, 1267–1275, 2000.
- Eberhardt, E., Stead, D. and Stimpson, B.: Quantifying progressive pre-peak brittle fracture damage in rock during uniaxial  
665 compression, *Int. J. Rock Mech. Min.*, 36, 361–380, 1999.
- Fellin, W.: Einführung in die Eis-, Schnee- und Lawinenmechanik, Springer Vieweg, Berlin, Heidelberg, 2013.
- Fischer, L., Käab, A., Huggel, C. and Noetzi, J.: Geology, glacier retreat and permafrost degradation as controlling factors of slope instabilities in a high-mountain rock wall. The Monte Rosa east face, *Nat. Hazard. Earth Sys.*, 6, 761–772, 2006.
- Fish, A. M. and Zaretsky, Y. K.: Ice strength as a function of hydrostatic pressure and temperature, in: CRREL Report, 97, 1–  
670 13, 1997.
- Gagnon, R. E. and Gammon, P. H.: Triaxial experiments on iceberg and glacier ice, *J. Glaciol.*, 41, 528–540, 1995.
- Galleman, T., Haas, U., Teipel, U., Poschinger, A. von, Wagner, B., Mahr, M. and Bäse, F.: Permafrost-Messstation am Zugspitzgipfel: Ergebnisse und Modellberechnungen, *Geologica Bavarica*, 115, 1–77, 2017.
- Girard, L., Beutel, J., Gruber, S., Hunziker, J., Lim, R. and Weber, S.: A custom acoustic emission monitoring system for harsh  
675 environments. Application to freezing-induced damage in alpine rock walls, *Geosci. Instrum. Meth.*, 1, 155–167, doi: 10.5194/gi-1-155-2012, 2012.
- Glamheden, R. and Lindblom, U.: Thermal and mechanical behaviour of refrigerated caverns in hard rock, *Tunn. Undergr. Sp. Tech.*, 17, 341–353, 2002.
- Gobiet, A., Kotlarski, S., Beniston, M., Heinrich, G., Rajczak, J. and Stoffel, M.: 21st century climate change in the European  
680 Alps-A review, *Sci. Total Environ.*, 493, 1138–1151, doi: 10.1016/j.scitotenv.2013.07.050, 2014.
- Gruber, S., Hoelzle, M. and Haeberli, W.: Permafrost thaw and destabilization of Alpine rock walls in the hot summer of 2003, *Geophys. Res. Lett.*, 31, L13504, doi: 10.1029/2004GL020051, 2004.
- Gruber, S. and Haeberli, W.: Permafrost in steep bedrock slopes and its temperature-related destabilization following climate change, *J. Geophys. Res.*, 112, 1–10, doi: 10.1029/2006JF000547, 2007.
- 685 Günzel, F. K.: Shear strength of ice-filled rock joints, in: Proceedings of the 9th International Conference on Permafrost, Fairbanks, Alaska, 28 June–3 July 2008, 581–586, 2008.
- Hardy, H. R.: Acoustic Emission/Microseismic Activity - Volume 1. Principles, Techniques and Geotechnical Applications, A.A. Balkema Publisher, a member of Swets & Zeitlinger Publishers, 2003.
- Harris, C., Vonder Mühll, D., Isaksen, K., Haeberli, W., Sollid, J. L., King, L., Holmlund, P., Dramis, F., Guglielmin, M. and  
690 Palacios, D.: Warming permafrost in European mountains, *Global Planet. Change*, 39, 215–225, doi: 10.1016/j.gloplacha.2003.04.001, 2003.





- Harris, S. A., French, H. M., Heginbottom, J. A., Johnston, G. H., Ladanyi, B., Sego, D. C. and van Erdingen, R. O.: Glossary of Permafrost and Related Ground-Ice Terms, Technical Memorandum No. 142, Permafrost-Subcommittee, Associate Committee on Geotechnical Research, National Research Council Canada, Ottawa, 159 pp., doi: 10.4224/20386561, 1988.
- 695 Hobbs, P. V.: Ice Physics, Oxford University Press, Oxford, New York, 837 pp., 1974.
- Jellinek, H. H. G.: Adhesive properties of ice, J. Coll. Sci. Imp. U. Tok., 14, 268–280, 1959
- Jerz, H. and Poschinger, A. von: Neuere Ergebnisse zum Bergsturz Eibsee-Grainau, Geologica Bavarica, 99, 383–398, 1995.
- Jones, S. J. and Glen, J. W.: The mechanical properties of single crystals of ice at low temperatures, International Association of Hydrological Sciences Publ., 79, 326–340, 1968.
- 700 Kodama, J., Goto, T., Fujii, Y. and Hagan P.: The effects of water content, temperature and loading rate on strength and failure process of frozen rocks, Int. J. Rock Mech. Min., 62, 1–13, 2013.
- Krautblatter, M., Verleysdonk, S., Flores-Orozco, A. and Kemna, A.: Temperature-calibrated imaging of seasonal changes in permafrost rock walls by quantitative electrical resistivity tomography (Zugspitze, German/Austrian Alps), J. Geophys. Res., 115, 1–15, 2010.
- 705 Krautblatter, M., Funk, D. and Günzel, F. K.: Why permafrost rocks become unstable: a rock-ice-mechanical model in time and space, Earth Surf. Proc. Land., 38, 876–887, 2013.
- Lockner, D.: The role of acoustic emission in the study of rock, Int. J. Rock Mech. Min., 30(7), 883–899, 1993.
- MathWorks: Statistics and machine learning toolbox, regression, model building and assessment, coefficient standard errors and confidence intervals (R2017a): [https://ch.mathworks.com/help/stats/coefficient-standard-errors-and-confidence-](https://ch.mathworks.com/help/stats/coefficient-standard-errors-and-confidence-intervals.html?searchHighlight=standard%20error%20estimate%20linearmodel&s_tid=doc_srchtile)
- 710 [intervals.html?searchHighlight=standard%20error%20estimate%20linearmodel&s\\_tid=doc\\_srchtile](https://ch.mathworks.com/help/stats/coefficient-standard-errors-and-confidence-intervals.html?searchHighlight=standard%20error%20estimate%20linearmodel&s_tid=doc_srchtile)
- Mellor, M.: Mechanical properties of rocks at low temperatures, in: Proceedings of the 2nd International Conference on Permafrost, Yakutsk, Siberia, 13–28 July 1973, 334–344, 1973.
- Murton, J., Kuras, O., Krautblatter, M., Cane, T., Tschöfen, D., Uhlemann, S., Schober, S. and Watson, P.: Monitoring rock freezing and thawing by novel geoelectrical and acoustic techniques, J. Geophys. Res., 121, 2309–2332, doi: 10.1002/2016JF003948, 2016.
- 715 Nechad, H., Helmstetter, A., Guerjouma, R. El and Sornette, D.: Creep rupture in heterogeneous materials, Phys. Rev. Lett., 94, 45501, doi: 10.1103/PhysRevLett.94.045501, 2005.
- Noetzli, J., Gruber, S. and Poschinger, A. von: Modellierung und Messung von Permafrosttemperaturen im Gipfelgrat der Zugspitze, Deutschland, Geographica Helvetica, 65, 113–123, 2010.
- 720 Paterson, W. S. B.: The physics of glaciers, 3rd edition, Butterworth Heinemann, Oxford, 496 pp., 1994.
- Ravanel, L. and Deline, P.: La face ouest des Drus (massif du Mont-Blanc): évolution de l’instabilité d’une paroi rocheuse dans la haute montagne alpine depuis la fin du petit âge glaciaire, Geomorphologie, 4, 261–272, 2008.
- Ravanel, L., Allignol, F., Deline, P., Gruber, S. and Ravello, M.: Rock falls in the Mont Blanc Massif in 2007 and 2008, Landslides, 7, 493–501, 2010.



- 725 Ravanel, L. and Deline, P.: Climate influence on rockfalls in high-Alpine steep rockwalls. The north side of the Aiguilles de  
Chamonix (Mont Blanc massif) since the end of the ‘Little Ice Age’, *Holocene*, 21, 357–365, doi: 10.1177/0959683610374887,  
2011.
- Ravanel, L. and Deline, P.: Rockfall Hazard in the Mont Blanc Massif Increased by the Current Atmospheric Warming, in:  
Engineering Geology for Society and Territory - Volume 1: Climate Change and Engineering Geology, Springer International  
730 Publishing, Cham, 425–428, 2015.
- Rempel, A. W., Wettlaufer, J. S. and Worster, M. G.: Premelting dynamics in a continuum model of frost heave, *J. Fluid  
Mech.*, 498, 227–244, 2004.
- Renshaw, C. E. and Schulson, E. M.: Universal behaviour in compressive failure of brittle materials, *Nature*, 412, 897–900,  
doi: 10.1038/35091045, 2001.
- 735 Sanderson, T. J. O.: Ice Mechanics. Risks to offshore structures, Graham & Trotman, 253 pp., 1988.
- Scholz, C. H.: Microfracturing and the inelastic deformation of rock in compression, *J. Geophys. Res.*, 73, 1417–1432, doi:  
10.1029/JB073i004p01417, 1968.
- Schulson, E. M. and Duval, P.: Creep and Fracture of Ice, Cambridge University Press, 401 pp., 2009.
- Senfaute, G., Duperret, A. and Lawrence, J. A.: Micro-seismic precursory cracks prior to rock-fall on coastal chalk cliffs. A  
740 case study at Mesnil-Val, Normandie, NW France, *Nat. Hazard. Earth Sys.*, 9, 1625–1641, 2009.
- Shiotani, T., Fujii, K., Aoki, T. and Amou, K.: Evaluation of progressive failure using AE sources and improved b-value on  
slope model tests, *Progress in AE VII*, 529–534, 1994.
- Shiotani, T., Li, Z., Yuyama, S. and Ohtsu, M.: Application of the AE improved b-value to quantitative evaluation of fracture  
proces in concrete materials, *Journal of AE*, 19, 118–133, 2001.
- 745 Sornette, D.: Critical Phenomena in Natural Sciences, Springer Verlag, Berlin, 2006.



## Tables

**Table 1: Calculated decrease in shear stress at failure with increasing temperature.**

| Normal stress<br>class [kPa] | Temperature range used<br>for calculation [°C] | Calculated percentage decrease due to<br>warming [%] |                      | R <sup>2</sup> | p-value |
|------------------------------|------------------------------------------------|------------------------------------------------------|----------------------|----------------|---------|
|                              |                                                | Total                                                | Per increase of 1 °C |                |         |
| 100                          | -10 to -0.5                                    | 70.2                                                 | 7.4                  | 0.47           | < 0.01  |
| 200                          | -10 to -0.5                                    | 78.1                                                 | 8.2                  | 0.58           | < 0.01  |
| 400                          | -10 to -0.5                                    | 63.5                                                 | 6.7                  | 0.44           | < 0.01  |
| 800                          | -4 to -0.5                                     | 60.1                                                 | 17.2                 | 0.75           | < 0.01  |

750

**Table 2: Calculated absolute and percentage decrease of cohesion and friction due to warming for various normal stress- and temperature ranges.**

| Valid normal<br>stress range<br>[kPa] | Valid temperature<br>range [°C] | Mechanical<br>parameter | Decrease due to warming |      |                      |      | R <sup>2</sup> | p-value |
|---------------------------------------|---------------------------------|-------------------------|-------------------------|------|----------------------|------|----------------|---------|
|                                       |                                 |                         | total                   |      | per increase of 1 °C |      |                |         |
|                                       |                                 |                         | absolute                | %    | absolute             | %    |                |         |
| 100 to 400                            | -8 to -0.5                      | c [kPa]                 | 551.3                   | 86.0 | 73.5                 | 11.5 | 0.96           | 0.00    |
|                                       |                                 | μ                       | 1.58                    | 75.0 | 0.21                 | 10.0 | 0.78           | 0.05    |
|                                       | -4 to -0.5                      | c [kPa]                 | 257.3                   | 74.1 | 83.5                 | 21.2 | 0.87           | 0.24    |
|                                       |                                 | μ                       | 0.74                    | 58.3 | 0.38                 | 16.7 | 0.97           | 0.11    |
| 100 to 800                            | -4 to -0.5                      | c [kPa]                 | 503.3                   | 74.1 | 143.8                | 21.2 | 0.85           | 0.08    |
|                                       |                                 | μ                       | 0.35                    | 59.3 | 0.10                 | 17.0 | 0.95           | 0.02    |
